# Supplementary material for: Photoinduced C(sp3)–H sulfination empowers the direct and chemoselective introduction of the sulfonyl group
Source: Royal Society of Chemistry journal article supplement (doi:10.1039/d1sc04245a), 2021-01-01
Supplement: d1sc04245a1.pdf [file d1sc04245a1.pdf]

## Supporting Information

# Photoinduced C(sp<sup>3</sup>)-H Sulfination Empowers a Direct, Chemo- and Regioselective Introduction of the Sulfonyl Group

Shengfei Jin,<sup>§</sup> Graham C. Haug,<sup>†</sup> Ramon Trevino,<sup>†</sup> Viet D. Nguyen,<sup>†</sup> Hadi D. Arman, and  
Oleg V. Larionov\*

Department of Chemistry, The University of Texas at San Antonio, San Antonio, Texas  
78249, United States  
oleg.larionov@utsa.edu

## Contents

|                                          |      |
|------------------------------------------|------|
| Materials and experimental details ..... | S1   |
| General procedures .....                 | S3   |
| C-H Sulfination products .....           | S5   |
| Sulfonyl derivatives .....               | S39  |
| Computational data .....                 | S53  |
| X-ray crystallographic data .....        | S142 |
| NMR spectroscopic data .....             | S150 |
| References .....                         | S288 |

## Materials and experimental details

**Materials:** Acetonitrile and dichloromethane were dried over 3 Å molecular sieves. Deionized water was thoroughly degassed prior to use. *N*-Butyl-2,2,2-trifluoroacetamide, <sup>1</sup> methyl (2,2,2-trifluoroacetyl)-*D*-valinate, <sup>2</sup> methyl 2-(4-isobutylphenyl)propanoate<sup>3</sup> were prepared as described elsewhere. All other chemicals were obtained from commercial sources and used without further purification.

<sup>†</sup> These authors contributed equally to this work.

<sup>§</sup> Current address: Wuya College of Innovation, Shenyang Pharmaceutical University, Shenyang, Liaoning 110016, P. R. China

**Experimental equipment:** The photochemical reactions were conducted in quartz test-tubes (typically 6 or 10 mL capacity with GL14 and GL16 screw caps, Quartz Scientific, Inc.) in a Rayonet RPR-100 photochemical reactor equipped with 16 Rayonet RPR-300 or Ushio 8W T5 UV-C lamps with the fan on. Given the higher molar absorptivity of sulfur dioxide at 300 nm, RPR-300 were more efficient light sources. The efficiency of the lamps was found to decrease over time, and new lamps gave the best results. The chamber temperature was 25 °C. The reaction test-tubes were placed ~2 cm from the UV lamps on a stirplate. For heterogenous reactions, efficient stirring was key to achieving high yields, and rare-earth stirbars in combination with a high and stable stirring rate (2500 rpm) served best to prevent a loss in yields due to poor mixing. Reaction mixtures should be thoroughly deoxygenated to prevent side reactions. Cyclic voltammetry (CV) measurements were performed on a CHI 650D potentiostat using a three-electrode cell with a glassy-carbon working electrode, a Ag|AgCl (1M KCl) reference electrode and a Pt counter electrode. CV was conducted at a scan rate of 100 mV s<sup>-1</sup> for tetrabutylammonium methanesulfinate (0.4mM) in anhydrous degassed acetonitrile with tetrabutylammonium hexafluorophosphate (0.2M) as an electrolyte. Inflection-point potentials were used to characterize irreversible redox processes, since they were shown to provide the best approximation of standard electrochemical potentials for irreversible redox systems.<sup>4</sup>

**Purification:** Purification was carried out by means of flash chromatography. Thin layer chromatography was carried out on silica gel-coated glass plates (Merck Kieselgel 60 F254). Plates were visualized under ultraviolet light (254 nm) and using a potassium permanganate stain.

**Characterization:** <sup>1</sup>H, <sup>13</sup>C, and <sup>19</sup>F NMR spectra were recorded at 500 MHz or 300 MHz (<sup>1</sup>H), 125 MHz or 75 MHz (<sup>13</sup>C), 470 (<sup>19</sup>F) MHz on an Agilent Inova 500 or 300, and Bruker AVANCE III 500 instruments in CDCl<sub>3</sub> or other specified deuterated solvents with and without tetramethylsilane (TMS) as an internal standard at 25 °C, unless specified

[Go back to table of contents](#)

otherwise. Chemical shifts ( $\delta$ ) are reported in parts per million (ppm) from tetramethylsilane ( $^1\text{H}$  and  $^{13}\text{C}$ ) and  $\text{CFCl}_3$  ( $^{19}\text{F}$ ). Coupling constants ( $J$ ) are in Hz. Proton multiplicity is assigned using the following abbreviations: singlet (s), doublet (d), triplet (t), quartet (q), quintet (quint.), septet (sept.), multiplet (m), broad (br).

Infrared measurements were carried out neat on a Bruker Vector 22 FT-IR spectrometer fitted with a Specac diamond attenuated total reflectance (ATR) module.

## Experimental Procedures

### General procedure for the photoinduced C–H sulfination (GP1)

Acetonitrile or dichloromethane or hexafluoroisopropanol (HFIP) (3–5 mL) and  $\text{Na}_2\text{S}_2\text{O}_5$  (0.2–3 mmol) were placed in a quartz test-tube equipped with a stirbar. Argon was bubbled through a glass pipet reaching to the bottom of the test-tube while vigorous stirring was maintained for 5 min. The C–H substrate (0.2–1 mmol) and water (0.75–1 mL) were then added, and the test-tube was sealed with a rubber septum. The solution was stirred for 5 min, and the septum on the quartz test-tube was additionally secured with Parafilm<sup>®</sup> tape to minimize exposure of the solution to air. The reaction mixture was irradiated with vigorous stirring at 25 °C for the specified time in a Rayonet RPR-100 photochemical reactor.

### General procedure for the photoinduced C–H sulfination (GP2)

Acetonitrile (5 mL) or HFIP (3 mL) or trifluoroethanol (TFE) (3 mL) and  $\text{Na}_2\text{S}_2\text{O}_5$  (1.5–3 mmol) were placed in a quartz test-tube equipped with a stirbar. Argon was bubbled through a glass pipet reaching to the bottom of the test-tube while vigorous stirring was maintained for 5 min. The C–H substrate (0.2–0.3 mmol) and 12M aqueous HCl (0.1–0.25 mL) were then added, and the test-tube was sealed with a rubber septum. The solution was stirred for 5 min, and the septum on the quartz test-tube was additionally secured with Parafilm<sup>®</sup> tape to minimize exposure of the solution to air. The reaction mixture was

irradiated with vigorous stirring at 25 °C for the specified time in a Rayonet RPR-100 photochemical reactor.

#### **General procedure for the alkylation of sulfinate salts obtained by GP1 (GP3)**

A pressure tube equipped with a stirbar was purged with argon, and the reaction mixture obtained in GP1 was quickly transferred into the flask. Iodomethane (2–5 mmol) or allyl bromide (2–3 mmol) was added, and the reaction mixture was stirred at 60 °C for 4 h. The reaction mixture was extracted with EtOAc (3 × 15 mL). The organic phases were combined, dried over anhydrous Na<sub>2</sub>SO<sub>4</sub> and concentrated under reduced pressure. The crude product was concentrated and purified by flash chromatography on silica gel or neutral aluminum (EtOAc/hexane) to give the desired sulfone.

#### **General procedure for the alkylation of sulfinate salts obtained by GP2 (GP4)**

A pressure tube equipped with a stirbar was purged with argon, and the reaction mixture obtained in GP2 was quickly transferred into the flask. *N,N*-Diisopropylethylamine (3 mmol), iodomethane or allyl bromide (2–3 mmol) were added, and the reaction mixture was stirred at 60 °C for 4 h. The reaction mixture was extracted with EtOAc (3 × 15 mL). The organic phases were combined, dried over anhydrous Na<sub>2</sub>SO<sub>4</sub> and concentrated under reduced pressure. The crude product was purified by flash chromatography on silica gel (EtOAc/hexane) to give the desired sulfone.

### **Quantum yield measurement**

The photon flux of the photochemical setup was determined using the azoxybenzene chemical actinometer system.<sup>5</sup> Incident photon flux: 3.04 μmol photons per second. The direct photoinduced C–H sulfination of cyclohexane was carried out as described in GP1. Yield was determined by <sup>1</sup>H NMR spectroscopy, using lactic acid as an internal standard.  $\Phi = 0.0051$ .

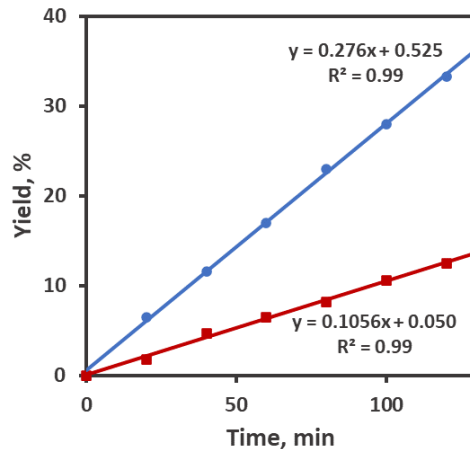

**Figure S1.** Kinetic isotope effect in the C–H sulfination of cyclohexane. Parallel reactions were performed as described in GP1 with cyclohexane (●) and *d*<sub>12</sub>-cyclohexane (■).

### C–H Sulfination products

#### Photoinduced C–H sulfination of cyclohexane: sodium cyclohexanesulfinate (**1**)<sup>6</sup>

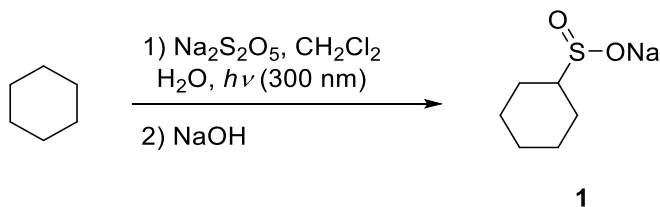

According to GP1, a stirred mixture of acetonitrile (4 mL) and Na<sub>2</sub>S<sub>2</sub>O<sub>5</sub> (114 mg, 0.6 mmol) was degassed with Ar for 5 min in a quartz test-tube. Cyclohexane (42 mg, 0.5 mmol) and water (1 mL, degassed prior to use) were then added. The solution was stirred vigorously and irradiated at 25 °C for 36 h in a Rayonet RPR-100 photochemical reactor., 1 M NaOH in methanol solution (1 mL) was added, and the reaction mixture was stirred at room temperature for 10 min. The reaction mixture was concentrated under nitrogen to dryness. The crude product was purified by flash chromatography on silica gel (MeOH/DCM, 1 : 10 v/v) to give sulfinate **1** (70 mg, 82%) as a white solid.

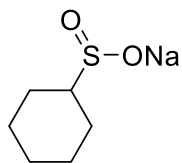

m.p. >250 °C. – <sup>1</sup>H NMR (500 MHz, CD<sub>3</sub>OD): 1.98–1.75 (5 H, m), 1.65 (1 H, d, *J* = 11.8 Hz), 1.37–1.12 (5 H, m) ppm. – <sup>13</sup>C NMR (125 MHz, CD<sub>3</sub>OD): 67.6, 27.2, 26.8, 26.2 ppm. – IR: 3325, 2919, 1650, 1452, 982, cm<sup>-1</sup>.

### Photoinduced C–H sulfination of cyclopentane: sulfone **2**<sup>7</sup>

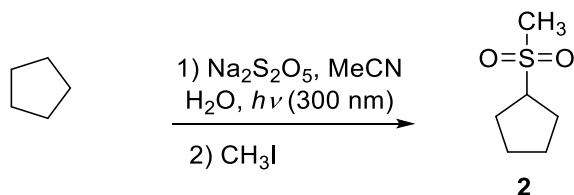

According to GP1, a stirred mixture of MeCN (4.25 mL) and Na<sub>2</sub>S<sub>2</sub>O<sub>5</sub> (114 mg, 0.6 mmol) was degassed with Ar for 5 min in a quartz test-tube. Cyclopentane (35 mg, 0.5 mmol) and water (0.75 mL, degassed prior to use) were then added. The solution was stirred vigorously and irradiated at 25 °C for 16 h in a Rayonet RPR-100 photochemical reactor. The reaction mixture was transferred into a pressure tube, iodomethane (0.3 mL, 5 mmol) and MeOH (1 mL) were added, and the reaction mixture was stirred at 60 °C for 4 h according to GP3. The reaction mixture was then extracted with EtOAc (3 × 15 mL). The organic phases were combined, dried over anhydrous Na<sub>2</sub>SO<sub>4</sub> and concentrated under reduced pressure to give sulfone **2** (58 mg, 78%) as a colorless oil.

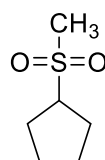
<sup>1</sup>H NMR (300 MHz, C<sub>6</sub>D<sub>6</sub>): 2.86 – 2.64 (1 H, m), 2.27–2.09 (3 H, m), 1.94–1.74 (2 H, m), 1.60–1.32 (4 H, m), 1.29–1.11 (2 H, m) ppm. – <sup>13</sup>C NMR (75 MHz, C<sub>6</sub>D<sub>6</sub>): 62.5, 38.8, 27.0, 26.1 ppm. – IR: 3594, 2959, 2873, 1449, 1289, 1124, 966, 763, 596, 538 cm<sup>-1</sup>.

### Photoinduced C–H sulfination of cyclohexane: (methylsulfonyl)cyclohexane (3)<sup>8</sup>

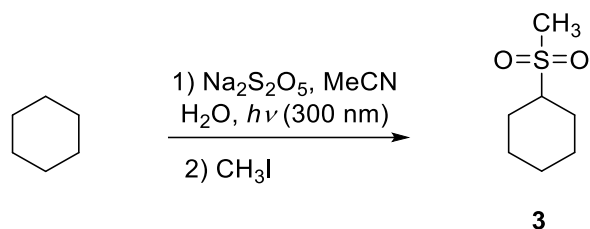

According to GP1, a stirred mixture of MeCN (4.25 mL) and Na<sub>2</sub>S<sub>2</sub>O<sub>5</sub> (114 mg, 0.6 mmol) was degassed with Ar for 5 min in a quartz test-tube. Cyclohexane (42 mg, 0.5 mmol) and water (0.75 mL, degassed prior to use) were then added. The solution was stirred vigorously and irradiated at 25 °C for 16 h in a Rayonet RPR-100 photochemical reactor. The reaction mixture was transferred into a pressure tube, iodomethane (0.3 mL, 5 mmol) was added, and the reaction mixture was stirred at 60 °C for 4 h according to GP3. The reaction mixture was then extracted with EtOAc (3 × 15 mL). The organic phases were combined, dried over anhydrous Na<sub>2</sub>SO<sub>4</sub> and concentrated under reduced pressure to give sulfone **3** (77 mg, 95%) as a colorless oil.

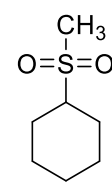 <sup>1</sup>H NMR (500 MHz, CDCl<sub>3</sub>): 2.84–2.60 (4 H, m), 2.10 (2 H, d, *J* = 12.0 Hz), 1.84 (2 H, d, *J* = 12.7 Hz), 1.65 (1 H, d, *J* = 12.5 Hz), 1.49–1.31 (2 H, m), 1.31–1.01 (3 H, m) ppm. – <sup>13</sup>C NMR (125 MHz, CDCl<sub>3</sub>): 62.3, 37.2, 25.4, 25.0 ppm. – IR: 3530, 2932, 2858, 1639, 1453, 1416, 1295, 1266, 1129, 1111, 961, 895, 864, 763, 646, 602, 545 cm<sup>-1</sup>.

### Photoinduced C–H sulfination of cycloheptane: (methylsulfonyl)cycloheptane (4)

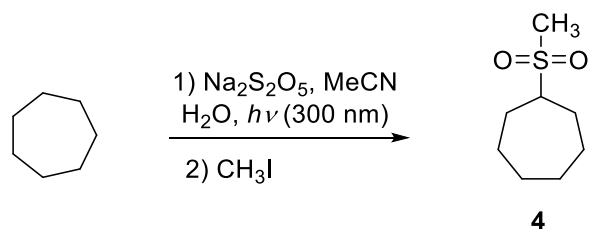

According to GP1, a stirred mixture of MeCN (4.25 mL) and Na<sub>2</sub>S<sub>2</sub>O<sub>5</sub> (114 mg, 0.6 mmol) was degassed with Ar for 5 min in a quartz test-tube. Cycloheptane (49 mg, 0.5 mmol) and water (0.75 mL, degassed prior to use) were then added. The solution was stirred

vigorously and irradiated at 25 °C for 16 h in a Rayonet RPR-100 photochemical reactor. The reaction mixture was transferred into a pressure tube, iodomethane (0.3 mL, 5 mmol) and MeOH (1 mL) were added, and the reaction mixture was stirred at 60 °C for 4 h according to GPXX. The reaction mixture was then extracted with EtOAc (3 × 15 mL). The organic phases were combined, dried over anhydrous Na<sub>2</sub>SO<sub>4</sub> and concentrated under reduced pressure to give sulfone **4** (64 mg, 73%) as a colorless oil.

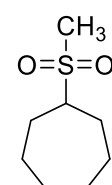
<sup>1</sup>H NMR (300 MHz, C<sub>6</sub>D<sub>6</sub>): 2.64–2.39 (1 H, m), 2.23 (3 H, s), 2.11–1.90 (2 H, m), 1.60–1.37 (4 H, m), 1.36–0.91 (6 H, m) ppm. – <sup>13</sup>C NMR (75 MHz, C<sub>6</sub>D<sub>6</sub>): 64.0, 37.0, 28.3, 27.4, 26.0 ppm. – IR: 2926, 2857, 1709, 1463, 1363, 1281, 1131, 963, 766, 653, 594, 538, 519 cm<sup>-1</sup>. – HRMS calcd for C<sub>8</sub>H<sub>17</sub>O<sub>2</sub>S: 177.0944, found 177.0945 [M+H<sup>+</sup>].

#### Photoinduced C–H sulfination of cyclooctane: (methylsulfonyl)cyclooctane (**5**)

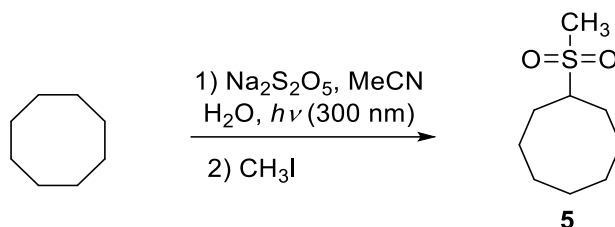

According to GP1, a stirred mixture of MeCN (4.25 mL) and Na<sub>2</sub>S<sub>2</sub>O<sub>5</sub> (114 mg, 0.6 mmol) was degassed with Ar for 5 min in a quartz test-tube. Cyclooctane (56 mg, 0.5 mmol) and water (0.75 mL, degassed prior to use) were then added. The solution was stirred vigorously and irradiated at 25 °C for 16 h in a Rayonet RPR-100 photochemical reactor. The reaction mixture was transferred into a pressure tube, iodomethane (0.3 mL, 5 mmol) and MeOH (1 mL) were added, and the reaction mixture was stirred at 60 °C for 4 h according to GP3. The reaction mixture was then extracted with EtOAc (3 × 15 mL). The organic phases were combined, dried over anhydrous Na<sub>2</sub>SO<sub>4</sub> and concentrated under reduced pressure to give sulfone **5** (62 mg, 65%) as a colorless oil.



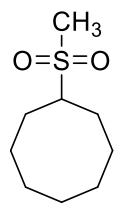

$^1\text{H}$  NMR (300 MHz,  $\text{C}_6\text{D}_6$ ): 2.75–2.50 (1 H, m), 2.21 (3 H, s), 2.11–1.87 (2 H, m), 1.58–1.01 (12 H, m) ppm. –  $^{13}\text{C}$  NMR (75 MHz,  $\text{C}_6\text{D}_6$ ): 62.3, 37.2, 25.4, 25.0 ppm.  
– IR: 2927, 1748, 1292, 1135, 651, 538  $\text{cm}^{-1}$ . – HRMS calcd for  $\text{C}_9\text{H}_{19}\text{O}_2\text{S}$ : 191.11, found 191.1099  $[\text{M}+\text{H}^+]$ .

### Photoinduced C–H sulfonation of pentane: sulfone 6a-c

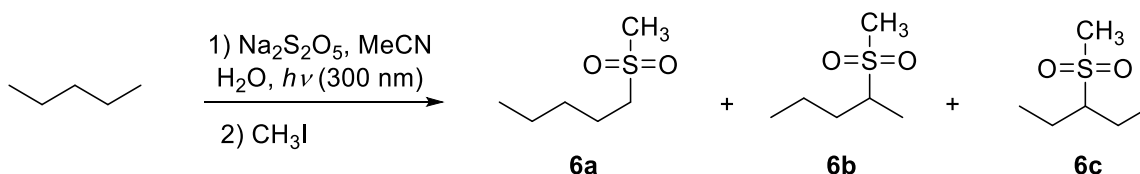

According to GP1, a stirred mixture of acetonitrile (4.25 mL) and  $\text{Na}_2\text{S}_2\text{O}_5$  (95 mg, 0.5 mmol) was degassed with Ar for 5 min in a quartz test-tube. Pentane (36 mg, 0.5 mmol) and water (0.75 mL, degassed prior to use) were then added. The solution was stirred vigorously and irradiated at 25 °C for 16 h in a Rayonet RPR-100 photochemical reactor. The reaction mixture was then transferred into a pressure tube, iodomethane (0.3 mL, 5 mmol) and MeOH (1 mL) were added, and the reaction mixture was stirred at 60 °C for 4 h according to GP3. The reaction mixture was then extracted with EtOAc ( $3 \times 15$  mL). The organic phases were combined, dried over anhydrous  $\text{Na}_2\text{SO}_4$  and concentrated under reduced pressure to give three regioisomers (61 mg, 81%, 1 : 8 : 5 ratio of isomers **6a-c**) as a colorless oil.

**6a:**  $^1\text{H}$  NMR (300 MHz,  $\text{C}_6\text{D}_6$ ): 3.01–2.91 (2 H, m), 2.88 (3 H, s), 1.76–0.98 (6 H, m), 0.40 (3 H, t,  $J = 9.0$  Hz) ppm.

**6b:**  $^1\text{H}$  NMR (300 MHz,  $\text{C}_6\text{D}_6$ ): 3.01–2.91 (1 H, m), 2.78 (3 H, s), 1.76–0.98 (4 H, m), 0.99 (3 H, d,  $J = 8.7$  Hz), 0.46 (3 H, t,  $J = 8.9$  Hz) ppm.

**6c:**  $^1\text{H}$  NMR (300 MHz,  $\text{C}_6\text{D}_6$ ): 2.80 (3 H, s), 2.62 (1 H, tt,  $J = 9.0, 6.1$  Hz), 1.76–0.98 (4 H, m), 0.62 (6 H, t,  $J = 9.4$  Hz) ppm.

$^{13}\text{C}$  NMR (75 MHz,  $\text{C}_6\text{D}_6$ , mixture of regioisomers): 66.3, 59.0, 54.8, 40.5, 38.6, 37.2, 31.2, 30.5, 22.2, 20.7, 19.9, 13.8, 13.2, 11.4 ppm. – IR: 2933, 2876, 1468, 1293, 1134, 1120, 958, 768, 635, 533  $\text{cm}^{-1}$ . – HRMS calcd for  $\text{C}_6\text{H}_{15}\text{O}_2\text{S}$ : 151.0787, found 151.0787 [ $\text{M}+\text{H}^+$ ].

**Photoinduced C–H sulfination of 2,3-dimethylbutane: sulfone 7a,b**

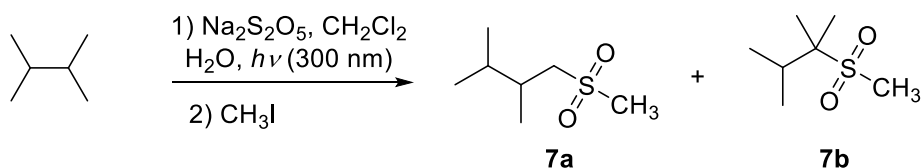

According to GP1, a stirred mixture of dichloromethane (3 mL) and  $\text{Na}_2\text{S}_2\text{O}_5$  (190 mg, 1 mmol) was degassed with Ar for 5 min in a quartz test-tube. 2,3-Dimethylbutane (56 mg, 0.5 mmol) and water (1.5 mL, degassed prior to use) were then added. The solution was stirred vigorously and irradiated at 25 °C for 16 h in a Rayonet RPR-100 photochemical reactor. The reaction mixture was transferred into a pressure tube, iodomethane (0.6 mL, 10 mmol) and MeOH (1 mL) were added, and the reaction mixture was stirred at 60 °C for 4 h according to GP3. The reaction mixture was then extracted with EtOAc (3 × 15 mL). The organic phases were combined, dried over anhydrous  $\text{Na}_2\text{SO}_4$  and concentrated under reduced pressure to give two regioisomers (131 mg, 80%, 5 : 1 ratio of **6b** and **6a**) as a colorless oil.

**7a**:  $^1\text{H}$  NMR (300 MHz,  $\text{C}_6\text{D}_6$ ): 2.54 (1 H, dd,  $J = 13.9, 3.5$  Hz), 2.34–2.25 (1 H, m), 2.21 (3 H, s), 1.52–1.36 (1 H, m), 1.09–1.00 (1 H, m), 0.91 (3 H, d,  $J = 6.8$  Hz), 0.62 (6 H, dd,  $J = 10.0, 6.9$  Hz) ppm.

**7b**:  $^1\text{H}$  NMR (300 MHz,  $\text{C}_6\text{D}_6$ ): 2.75–2.50 (1 H, m), 2.21 (3 H, s), 2.11–1.87 (2 H, m), 1.58–1.01 (12 H, m) ppm.

$^{13}\text{C}$  NMR (75 MHz,  $\text{C}_6\text{D}_6$ , mixture of regioisomers): 64.6, 58.6, 41.3, 35.8, 33.7, 32.5, 32.1, 19.3, 19.0, 18.8, 17.9, 16.0 ppm. – IR: 2965, 1470, 1385, 1285, 1135, 1110, 958, 776, 587  $\text{cm}^{-1}$ . – HRMS calcd for  $\text{C}_7\text{H}_{17}\text{O}_2\text{S}$ : 165.0944, found 165.0944 [ $\text{M}+\text{H}^+$ ].

**Photoinduced C–H sulfination of Pinacolone: 3,3-dimethyl-4-(methylsulfonyl)butan-2-one (8)**

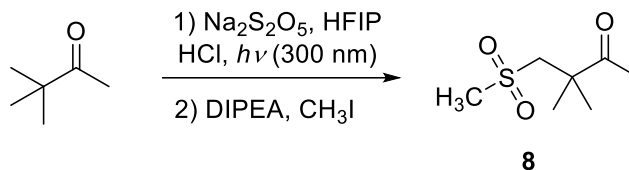

According to GP2, a stirred mixture of hexafluoroisopropanol (3 mL) and  $\text{Na}_2\text{S}_2\text{O}_5$  (570 mg, 3 mmol) was degassed with Ar for 5 min in a quartz test-tube. Pinacolone (20 mg, 0.2 mmol) and 12M aqueous HCl (0.25 mL) were then added. The solution was stirred vigorously and irradiated at 25 °C for 16 h in a Rayonet RPR-100 photochemical reactor. The reaction mixture was transferred into a pressure tube, *N,N*-diisopropylethylamine (0.5 mL, 3 mmol) and iodomethane (0.1 mL, 2 mmol) were added, and the reaction mixture was stirred at 60 °C for 4 h according to GP4. The reaction mixture was then extracted with EtOAc (3 × 15 mL). The organic phases were combined, dried over anhydrous  $\text{Na}_2\text{SO}_4$  and concentrated under reduced pressure. The crude product was purified by flash chromatography on silica gel (EtOAc/hexane, 1 : 5 v/v) to give sulfone **8** (14 mg, 40%) as a colorless oil.

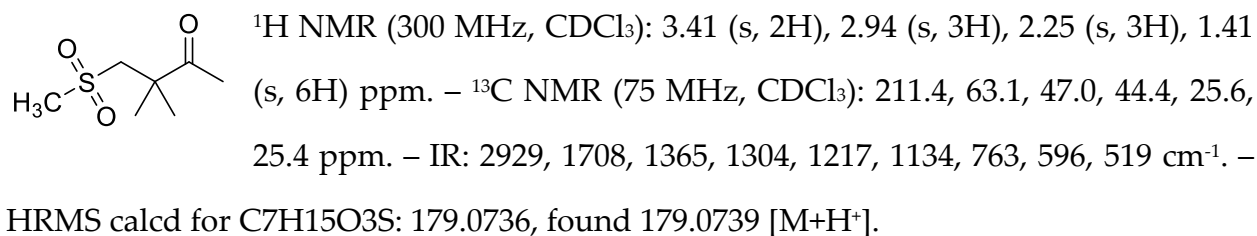

**Photoinduced C–H sulfination of pentan-3-one: 1-(allylsulfonyl)pentan-3-one (9)**

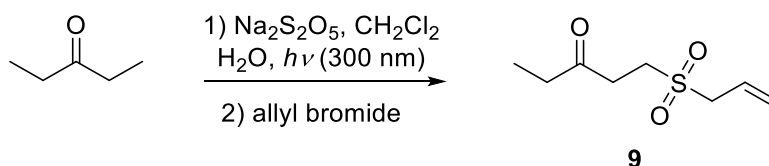

According to GP1, a stirred mixture of dichloromethane (3 mL) and Na<sub>2</sub>S<sub>2</sub>O<sub>5</sub> (152 mg, 0.8 mmol) was degassed with Ar for 5 min in a quartz test-tube. Pentan-3-one (17 mg, 0.2 mmol) and water (0.75 mL, degassed prior to use) were then added. The solution was stirred vigorously and irradiated at 25 °C for 16 h in a Rayonet RPR-100 photochemical reactor. The reaction mixture was transferred into a pressure tube, allyl bromide (0.2 mL, 2 mmol) was added, and the reaction mixture was stirred at 60 °C for 4 h according to GP3. The reaction mixture was then extracted with EtOAc (3 × 15 mL). The organic phases were combined, dried over anhydrous Na<sub>2</sub>SO<sub>4</sub> and concentrated under reduced pressure. The crude product was purified by flash chromatography on silica gel (EtOAc/hexane, 1 : 5 v/v) to give sulfone **9** (21 mg, 55%) as a colorless oil.

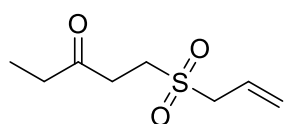

<sup>1</sup>H NMR (500 MHz, CDCl<sub>3</sub>): 5.94 (1 H, ddt, *J* = 17.6, 10.3, 7.4 Hz), 5.55–5.38 (2 H, m), 3.74 (2 H, d, *J* = 7.4 Hz), 3.27 (2 H, t, *J* = 7.3 Hz), 2.97 (2 H, t, *J* = 7.3 Hz), 2.52 (2 H, q, *J* = 7.3 Hz), 1.09 (3 H, t, *J* = 7.3 Hz) ppm. – <sup>13</sup>C NMR (125 MHz, CDCl<sub>3</sub>): 207.2, 125.2, 124.9, 58.8, 45.8, 36.2, 33.8, 7.8 ppm. – IR: 3337, 2935, 1716, 1640, 1460, 1416, 1370, 1320, 1276, 1244, 1127, 989, 925, 795, 665, 631, 530 cm<sup>-1</sup>. – HRMS calcd for C<sub>8</sub>H<sub>15</sub>O<sub>3</sub>S: 191.0736, found 191.0737 [M+H<sup>+</sup>].

#### Photoinduced C–H sulfination of pentan-2-one: sulfone **10a,b**

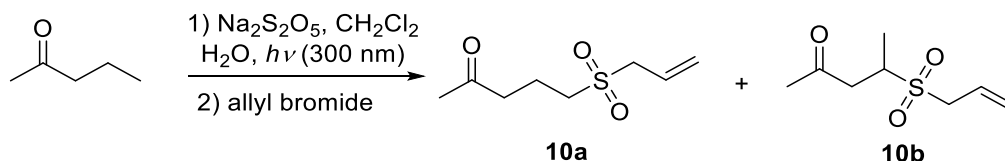

According to GP1, a stirred mixture of dichloromethane (3 mL) and Na<sub>2</sub>S<sub>2</sub>O<sub>5</sub> (152 mg, 0.8 mmol) was degassed with Ar for 5 min in a quartz test-tube. Pentan-2-one (17 mg, 0.2 mmol) and water (1.5 mL, degassed prior to use) were then added. The solution was stirred vigorously and irradiated at 25 °C for 16 h in a Rayonet RPR-100 photochemical

reactor. The reaction mixture was transferred into a pressure tube, allyl bromide (0.2 mL, 2 mmol) was added, and the reaction mixture was stirred at 60 °C for 4 h according to GP3. The reaction mixture was then extracted with EtOAc (3 × 15 mL). The organic phases were combined, dried over anhydrous Na<sub>2</sub>SO<sub>4</sub> and concentrated under reduced pressure. The crude product was purified by flash chromatography on silica gel (EtOAc/hexane, 1 : 5 v/v) to give two separable regioisomers (32 mg, 85%, 1 : 3 ratio of sulfones **10a** and **10b**) as a colorless oil.

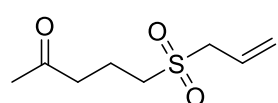

**10a:** <sup>1</sup>H NMR (500 MHz, CDCl<sub>3</sub>): 6.02–5.83 (1 H, m), 5.56–5.38 (2 H, m), 3.70 (2 H, d, *J* = 7.4 Hz), 2.99 (2 H, t, *J* = 6.7 Hz), 2.68 (2 H, t, *J* = 6.7 Hz), 2.15 (3 H, s), 2.13–2.01 (2 H, m) ppm. – <sup>13</sup>C NMR (125 MHz, CDCl<sub>3</sub>): 207.2, 125.1, 124.9, 57.8, 50.1, 41.2, 30.1, 16.3 ppm. – IR: 3583, 3004, 1708, 1421, 1358, 1220, 1092, 900, 678, 627, 528 cm<sup>-1</sup>. – HRMS calcd for C<sub>8</sub>H<sub>15</sub>O<sub>3</sub>S: 191.0736, found 191.074 [M+H<sup>+</sup>].

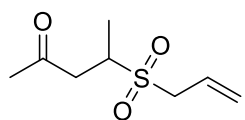

**10b:** <sup>1</sup>H NMR (500 MHz, CDCl<sub>3</sub>): 6.00–5.82 (1 H, m), 5.52–5.41 (2 H, m), 3.79–3.62 (3 H, m), 3.19 (1 H, dd, *J* = 18.3, 3.9 Hz), 2.60 (1 H, dd, *J* = 18.3, 8.8 Hz), 2.20 (3 H, s), 1.35 (3 H, d, *J* = 6.9 Hz) ppm. – <sup>13</sup>C NMR (125 MHz, CDCl<sub>3</sub>): 204.2, 124.9, 124.6, 55.6, 51.6, 41.8, 30.5, 14.5 ppm. – IR: 3003, 2357, 1709, 1421, 1358, 1220, 1092, 901, 685, 629, 529 cm<sup>-1</sup>. – HRMS calcd for C<sub>8</sub>H<sub>15</sub>O<sub>3</sub>S: 191.0736, found 191.0738 [M+H<sup>+</sup>].

#### Photoinduced C–H sulfination of hexan-2-one: sulfone **11a-c**

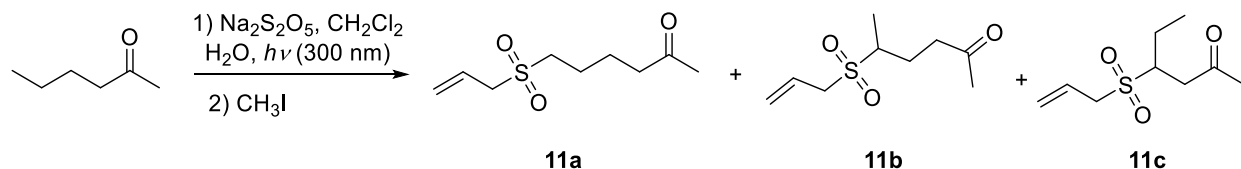

According to GP1, a stirred mixture of dichloromethane (3 mL) and Na<sub>2</sub>S<sub>2</sub>O<sub>5</sub> (114 mg, 0.6 mmol) was degassed with Ar for 5 min in a quartz test-tube. Hexan-2-one (20 mg, 0.2 mmol) and water (0.75 mL, degassed prior to use) were then added. The solution was stirred vigorously and irradiated at 25 °C for 16 h in a Rayonet RPR-100 photochemical reactor. The reaction mixture was transferred into a pressure tube, allyl-bromide (0.2 mL,

2 mmol) was added, and the reaction mixture was stirred at 60 °C for 4 h according to GP3. The reaction mixture was then extracted with EtOAc (3 × 15 mL). The organic phases were combined, dried over anhydrous Na<sub>2</sub>SO<sub>4</sub> and concentrated under reduced pressure. The crude product was purified by flash chromatography on silica gel (EtOAc/hexane, 1 : 5 v/v) to give three separable regioisomers (33 mg, 80%, 1: 12 : 2 ratio of isomers **11a**, **11b**, and **11c**) as a colorless oil.

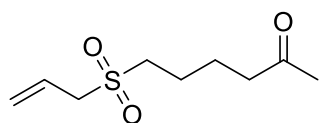

**11a:** <sup>1</sup>H NMR (500 MHz, CDCl<sub>3</sub>): 6.02–5.81 (1 H, m), 5.58–5.37 (2 H, m), 3.70 (2 H, d, *J* = 7.4 Hz), 3.03–2.85 (2 H, m), 2.49 (2 H, t, *J* = 7.0 Hz), 2.14 (3 H, s), 1.87–1.78 (2 H, m), 1.74–1.66 (2 H, m) ppm. – <sup>13</sup>C NMR (125 MHz, CDCl<sub>3</sub>): 207.8, 77.4, 77.2, 76.9, 57.9, 51.1, 42.8, 30.1, 22.5, 21.4 ppm. – IR: 3004, 1709, 1421, 1358, 1220, 1092, 920, 735, 647, 625, 528 cm<sup>-1</sup>. – HRMS calcd for C<sub>9</sub>H<sub>17</sub>O<sub>3</sub>S: 205.0893, found 205.0894 [M+H<sup>+</sup>].

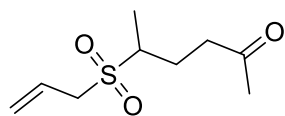

**11b:** <sup>1</sup>H NMR (500 MHz, CDCl<sub>3</sub>): 5.89 (1 H, ddt, *J* = 17.5, 10.4, 7.4 Hz), 5.51 – 5.34 (2 H, m), 3.71 (2 H, d, *J* = 7.3 Hz), 3.19 – 3.00 (1 H, m), 2.73 (1 H, dt, *J* = 18.3, 6.9 Hz), 2.58 (1 H, dt, *J* = 18.3, 7.2 Hz), 2.24 – 2.15 (1 H, m), 2.13 (3 H, s), 1.82 (1 H, td, *J* = 14.2, 7.5 Hz), 1.32 (3 H, d, *J* = 7.0 Hz) ppm. – <sup>13</sup>C NMR (125 MHz, CDCl<sub>3</sub>): 207.3, 124.7, 124.6, 55.16, 54.9, 39.7, 30.1, 23.3, 13.2 ppm. – IR: 3599, 3005, 1708, 1421, 1359, 1221, 1133, 1092, 920, 734, 625, 528 cm<sup>-1</sup>. – HRMS calcd for C<sub>9</sub>H<sub>17</sub>O<sub>3</sub>S: 205.0893, found 205.0896 [M+H<sup>+</sup>].

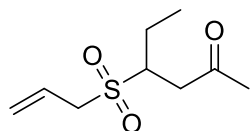

**11c:** <sup>1</sup>H NMR (500 MHz, CDCl<sub>3</sub>): 5.97–5.83 (1 H, m), 5.47 (2 H, ddd, *J* = 18.2, 13.6, 0.8 Hz), 3.70 (2 H, d, *J* = 7.3 Hz), 3.68–3.60 (1 H, m), 3.16 (1 H, dd, *J* = 18.5, 6.0 Hz), 2.62 (1 H, dd, *J* = 18.5, 5.8 Hz), 2.23 (3 H, s), 1.97 (1 H, ddd, *J* = 14.4, 7.5, 4.7 Hz), 1.72–1.60 (1 H, m), 0.99 (3 H, t, *J* = 7.5 Hz) ppm. – <sup>13</sup>C NMR (125 MHz, CDCl<sub>3</sub>): 204.5, 124.9, 124.7, 57.0, 40.7, 30.3, 22.2, 11.1 ppm. – IR: 3005, 1709, 1419, 1359, 1220, 1092, 820, 735, 648, 626, 528 cm<sup>-1</sup>. – HRMS calcd for C<sub>9</sub>H<sub>17</sub>O<sub>3</sub>S: 205.0893, found 205.0895 [M+H<sup>+</sup>].

**Photoinduced C–H sulfonation of 5-methylhexan-2-one: sulfone 12a-c**

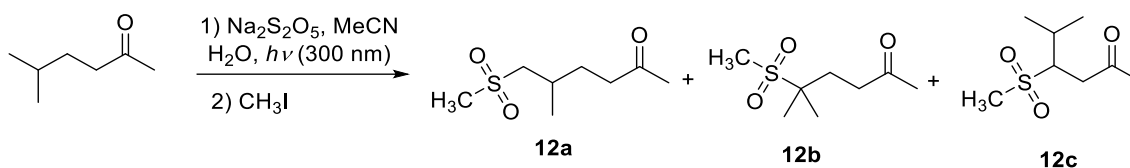

According to GP1, a stirred mixture of MeCN (3 mL) and Na<sub>2</sub>S<sub>2</sub>O<sub>5</sub> (57 mg, 0.3 mmol) was degassed with Ar for 5 min in a quartz test-tube. 5-Methylhexan-2-one (23 mg, 0.2 mmol) and water (0.75 mL, degassed prior to use) were then added. The solution was stirred vigorously and irradiated at 25 °C for 16 h in a Rayonet RPR-100 photochemical reactor. The reaction mixture was transferred into a pressure tube, iodomethane (0.1 mL, 2 mmol) was added, and the reaction mixture was stirred at 60 °C for 4 h according to GP3. The reaction mixture was then extracted with EtOAc (3 × 15 mL). The organic phases were combined, dried over anhydrous Na<sub>2</sub>SO<sub>4</sub> and concentrated under reduced pressure. The crude product was purified by flash chromatography on silica gel (EtOAc/hexane, 1 : 5 v/v) to give three separable regioisomers (30 mg, 78%, 1: 13 : 2 ratio of isomers **12a**, **12b**, and **12c**) as a colorless oil.

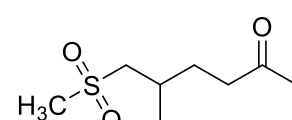
**12a:** <sup>1</sup>H NMR (500 MHz, CDCl<sub>3</sub>): 3.00 (1 H, dd, *J* = 14.0, 5.1 Hz), 2.92 (3 H, s), 2.88 (1 H, dd, *J* = 14.1, 7.5 Hz), 2.58 – 2.42 (2 H, m), 2.26 – 2.18 (1 H, m), 2.16 (2 H, s), 1.84 (1 H, ddd, *J* = 14.2, 8.6, 6.1 Hz), 1.64 – 1.53 (2 H, m), 1.14 (3 H, d, *J* = 6.7 Hz) ppm. – <sup>13</sup>C NMR (125 MHz, CDCl<sub>3</sub>): 208.2, 61.0, 42.0, 40.7, 30.4, 30.1, 28.1, 20.1 ppm. – IR: 3005, 1709, 1419, 1359, 1220, 1092, 919, 735, 629, 529 cm<sup>-1</sup>. – HRMS calcd for C<sub>8</sub>H<sub>17</sub>O<sub>3</sub>S: 193.0893, found 193.0894 [M+H<sup>+</sup>].

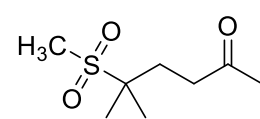
**12b:** <sup>1</sup>H NMR (500 MHz, CDCl<sub>3</sub>): 2.72 (3 H, s), 2.57 (2 H, t, *J* = 10.0 Hz), 2.08 (3 H, s), 1.94 (2 H, t, *J* = 10.0 Hz), 1.27 (6 H, s) ppm. – <sup>13</sup>C NMR (125 MHz, CDCl<sub>3</sub>): 207.1, 60.6, 38.0, 34.6, 30.0, 29.2, 21.0 ppm. – IR: 2935, 1713, 1417,

1369, 1282, 1173, 1109, 958, 631, 533  $\text{cm}^{-1}$ . – HRMS calcd for  $\text{C}_8\text{H}_{17}\text{O}_3\text{S}$ : 193.0893, found 193.0894  $[\text{M}+\text{H}^+]$ .

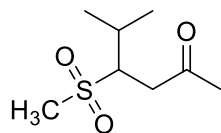

**12c:**  $^1\text{H}$  NMR (500 MHz,  $\text{CDCl}_3$ ): 3.64–3.57 (1 H, m), 3.10 (1 H, dd,  $J = 19.0, 7.7$  Hz), 2.81 (3 H, s), 2.62 (1 H, dd,  $J = 19.0, 3.4$  Hz), 2.53 (1 H, dtd,  $J = 13.7, 6.9, 3.0$  Hz), 2.24 (3 H, s), 0.98 (6 H, dd,  $J = 16.4, 6.9$  Hz) ppm. –

$^{13}\text{C}$  NMR (125 MHz,  $\text{CDCl}_3$ ): 205.1, 62.8, 41.6, 37.5, 30.2, 26.8, 21.4, 17.7 ppm. – IR: 2967, 1717, 1365, 1295, 1123, 803, 753, 630, 530  $\text{cm}^{-1}$ . – HRMS calcd for  $\text{C}_8\text{H}_{17}\text{O}_3\text{S}$ : 193.0893, found 193.0894  $[\text{M}+\text{H}^+]$ .

#### Photoinduced C–H sulfination of 2,6-dimethylheptan-4-one: sulfone **13a,b**

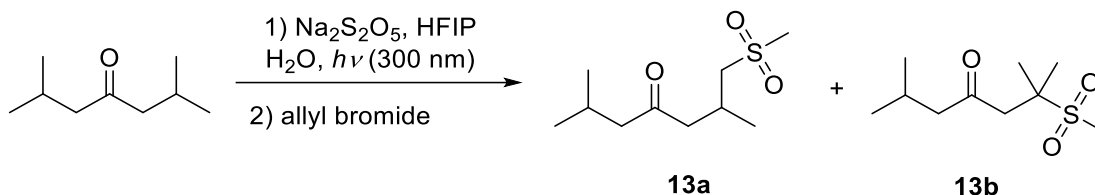

According to GP1, a stirred mixture of hexafluoroisopropanol (3 mL) and  $\text{Na}_2\text{S}_2\text{O}_5$  (76 mg, 0.4 mmol) was degassed with Ar for 5 min in a quartz test-tube. 2,6-Dimethylheptan-4-one (28 mg, 0.2 mmol) and water (0.75 mL, degassed prior to use) were then added. The solution was stirred vigorously and irradiated at 25 °C for 16 h in a Rayonet RPR-100 photochemical reactor. The reaction mixture was transferred into a pressure tube, iodomethane (0.1 mL, 2 mmol) was added, and the reaction mixture was stirred at 60 °C for 4 h according to GP3. The reaction mixture was then extracted with EtOAc ( $3 \times 15$  mL). The organic phases were combined, dried over anhydrous  $\text{Na}_2\text{SO}_4$  and concentrated under reduced pressure. The crude product was purified by flash chromatography on silica gel (EtOAc/hexane, 1 : 5 v/v) to give two separable regioisomers (33 mg, 76%, 1 : 8.5 ratio of sulfones **13a** and **13b**) as a colorless oil.



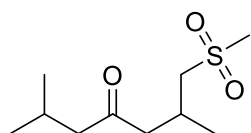

**13a:**  $^1\text{H}$  NMR (500 MHz,  $\text{CDCl}_3$ ): 3.09 (1 H, dd,  $J = 14.2, 5.5$  Hz), 2.93 (3 H, s), 2.87 (1 H, dd,  $J = 14.1, 6.7$  Hz), 2.71–2.58 (2 H, m), 2.47 (1 H, dd,  $J = 17.1, 5.1$  Hz), 2.25 (2 H, d,  $J = 7.0$  Hz), 2.10 (1 H, dp,  $J = 13.5, 6.6$  Hz), 1.15 (3 H, d,  $J = 6.7$  Hz), 0.88 (6 H, d,  $J = 6.7$  Hz) ppm. –  $^{13}\text{C}$  NMR (125 MHz,  $\text{CDCl}_3$ ):

209.3, 59.7, 52.2, 48.7, 41.5, 24.8, 24.7, 22.6, 20.5 ppm. – IR: 3020, 1708, 1306, 1214, 1133, 908, 748, 670, 650, 633, 531  $\text{cm}^{-1}$ . – HRMS calcd for  $\text{C}_{10}\text{H}_{21}\text{O}_3\text{S}$ : 221.1206, found 221.1208 [ $\text{M}+\text{H}^+$ ].

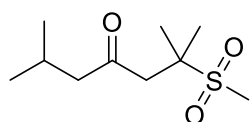

**13b:**  $^1\text{H}$  NMR 2.86 (2 H, s), 2.82 (3 H, s), 2.32 (2 H, d,  $J = 6.9$  Hz), 2.12 (1 H, dt,  $J = 13.5, 6.7$  Hz), 1.54 (6 H, s), 0.91 (6 H, d,  $J = 6.7$  Hz) ppm. –  $^{13}\text{C}$  NMR (125 MHz,  $\text{CDCl}_3$ ): 206.9, 61.3, 53.6, 44.8, 34.4, 24.6, 22.4, 20.4

ppm. – IR: 3019, 1214, 908, 749, 670, 651, 632, 535  $\text{cm}^{-1}$ . – HRMS calcd for  $\text{C}_{10}\text{H}_{21}\text{O}_3\text{S}$ : 221.1206, found 221.1208 [ $\text{M}+\text{H}^+$ ].

### Photoinduced C–H sulfonation of adamantan-2-one: sulfone 14a-d

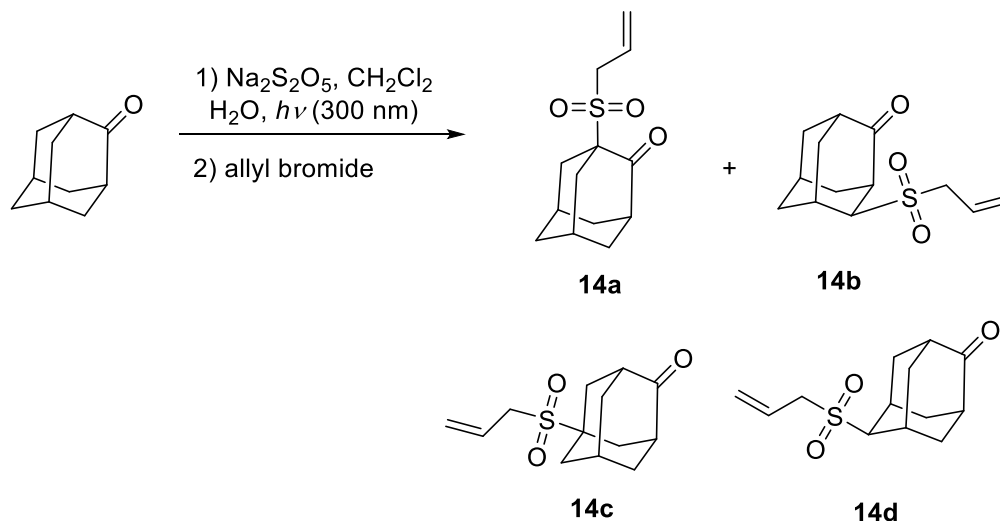

According to GP1, a stirred mixture of dichloromethane (3 mL) and Na<sub>2</sub>S<sub>2</sub>O<sub>5</sub> (190 mg, 1 mmol) was degassed with Ar for 5 min in a quartz test-tube. Adamantan-2-one (30 mg, 0.2 mmol) and water (0.75 mL, degassed prior to use) were then added. The solution was stirred vigorously and irradiated at 25 °C for 16 h in a Rayonet RPR-100 photochemical reactor. The reaction mixture was transferred into a pressure tube, allyl bromide (0.2 mL, 2 mmol) were added, and the reaction mixture was stirred at 60 °C for 4 h according to GP3. The reaction mixture was then extracted with EtOAc (3 × 15 mL). The organic phases were combined, dried over anhydrous Na<sub>2</sub>SO<sub>4</sub> and concentrated under reduced pressure. The crude product was purified by flash chromatography on silica gel (EtOAc/hexane, 1:3 v/v) to give four separable regioisomers (35 mg, 70%, 36.7 : 8.8 : 5.3 : 1 ratio of sulfones **14a**, **14b**, **14c**, and **14d**) as a colorless solid (**14a**) and colorless liquids (**14b-c**).

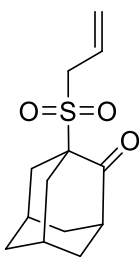

**14a:** m.p. 78–80 °C. – <sup>1</sup>H NMR (500 MHz, CDCl<sub>3</sub>): 6.02–5.86 (1 H, m), 5.50–5.42 (2 H, m), 4.02 (2 H, d, *J* = 7.4 Hz), 2.71 (1 H, s), 2.46 (2 H, d, *J* = 12.6 Hz), 2.37–2.27 (4 H, m), 2.10–1.97 (4 H, m), 1.93 (2 H, s) ppm. – <sup>13</sup>C NMR (125 MHz, CDCl<sub>3</sub>): 208.7, 124.9, 123.8, 72.2, 55.3, 47.7, 38.3, 37.7, 34.7, 27.7 ppm. – IR: 2922, 2852, 1737, 1721, 1454, 1365, 1216, 1139, 629, 535 cm<sup>-1</sup>. – HRMS calcd

for C<sub>13</sub>H<sub>18</sub>O<sub>3</sub>S: 255.1049, found 255.1051 [M+H<sup>+</sup>].

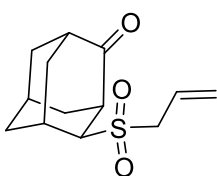

**14b:** <sup>1</sup>H NMR (500 MHz, CDCl<sub>3</sub>): 5.95 (1 H, dddd, *J* = 16.9, 10.1, 8.2, 6.6 Hz), 5.47 (2 H, ddd, *J* = 18.2, 13.6, 0.8 Hz), 3.76 (2 H, ddd, *J* = 20.8, 14.2, 7.4 Hz), 3.60 (1 H, d, *J* = 2.0 Hz), 2.97 (1 H, s), 2.80–2.63 (3 H, m), 2.24–

1.90 (8 H, m) ppm. – <sup>13</sup>C NMR (125 MHz, CDCl<sub>3</sub>): 212.2, 125.3, 124.7, 67.1, 56.8, 46.6, 45.9, 40.7, 40.3, 38.0, 33.5, 27.2, 26.9 ppm. – IR: 2926, 2857, 1726, 1454, 1318, 1216, 1131, 627 cm<sup>-1</sup>. – HRMS calcd for C<sub>13</sub>H<sub>18</sub>O<sub>3</sub>S: 255.1049, found 215.1049 [M+H<sup>+</sup>].

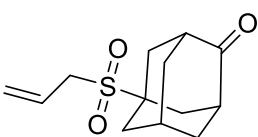

**14c:** <sup>1</sup>H NMR (500 MHz, CDCl<sub>3</sub>): 5.94 (1 H, td, *J* = 17.1, 7.3 Hz), 5.54–5.42 (2 H, m), 3.71 (2 H, d, *J* = 7.1 Hz), 2.72 (2 H, s), 2.45–2.25 (8 H, m), 2.13–1.97 (4 H, m) ppm. – <sup>13</sup>C NMR (125 MHz, CDCl<sub>3</sub>): 214.0,

125.0, 124.0, 60.3, 51.8, 45.5, 37.9, 36.7, 34.2, 27.7 ppm. – IR: 2920, 2855, 1725, 1456, 1365, 1289, 1216, 1135, 634 cm<sup>-1</sup>. – HRMS calcd for C<sub>13</sub>H<sub>18</sub>O<sub>3</sub>S: 255.1049, found 255.1052 [M+H<sup>+</sup>].

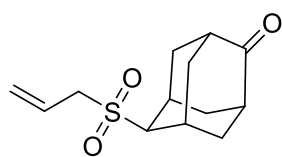

**14d:** <sup>1</sup>H NMR (500 MHz, CDCl<sub>3</sub>): 6.08–5.84 (1 H, m), 5.49 (2 H, dd, *J* = 26.3, 13.7 Hz), 3.80 (2 H, d, *J* = 7.4 Hz), 3.37 (1 H, s), 2.84 (2 H, d, *J* = 13.7 Hz), 2.64–2.52 (4 H, m), 2.19 (2 H, d, *J* = 13.7 Hz), 2.07–1.99 (2 H, m), 1.97–1.84 (2 H, m) ppm. – <sup>13</sup>C NMR (125 MHz, CDCl<sub>3</sub>): 215.4, 125.7, 124.6, 62.4, 57.4, 45.6, 45.4, 39.9, 33.4, 27.4 ppm. – IR: 2918, 2853, 1713, 1363, 1223, 914, 732, 648 cm<sup>-1</sup>. – HRMS calcd for C<sub>13</sub>H<sub>18</sub>O<sub>3</sub>S: 255.1049, found 255.1050 [M+H<sup>+</sup>].

### Photoinduced C–H sulfination of methyl butyrate: sulfone **15a,b**

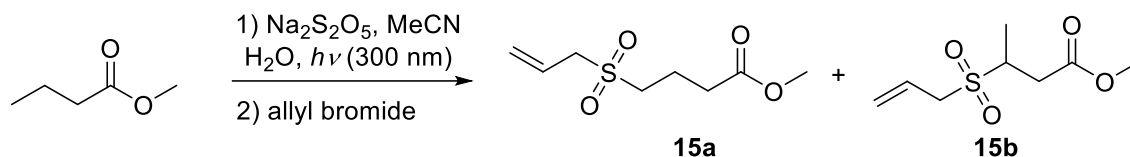

According to GP1, a stirred mixture of MeCN (3 mL) and Na<sub>2</sub>S<sub>2</sub>O<sub>5</sub> (38 mg, 0.2 mmol) was degassed with Ar for 5 min in a quartz test-tube. Methyl butyrate (20 mg, 0.2 mmol) and water (0.75 mL, degassed prior to use) were then added. The solution was stirred vigorously and irradiated at 25 °C for 16 h in a Rayonet RPR-100 photochemical reactor. The reaction mixture was transferred into a pressure tube, allyl bromide (0.2 mL, 2 mmol) was added, and the reaction mixture was stirred at 60 °C for 4 h according to GP3. The reaction mixture was then extracted with EtOAc (3 × 15 mL). The organic phases were combined, dried over anhydrous Na<sub>2</sub>SO<sub>4</sub> and concentrated under reduced pressure. The crude product was purified by flash chromatography on silica gel (EtOAc/hexane, 1 : 5 v/v) to give two separable regioisomers (28 mg, 68%, 1 : 3.5 ratio of isomers **15a** and **15b**) as a colorless oil.

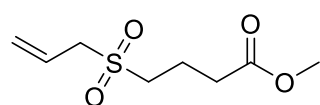

**15a:** <sup>1</sup>H NMR (500 MHz, CDCl<sub>3</sub>): 5.94 (1 H, ddt, *J* = 17.4, 10.1, 7.4 Hz), 5.48 (2 H, dd, *J* = 17.3, 13.8 Hz), 3.72 (2 H, d, *J* = 7.5 Hz), 3.69 (3 H, s), 3.11–3.00 (2 H, m), 2.53 (2 H, t, *J* = 7.0 Hz), 2.18–2.08 (2 H, m) ppm. – <sup>13</sup>C NMR

(125 MHz, CDCl<sub>3</sub>): 172.7, 125.1, 124.9, 57.9, 52.0, 50.2, 32.2, 17.6 ppm. – IR: 2920, 1732, 1438, 1312, 1124, 891, 711, 631, 534 cm<sup>-1</sup>. – HRMS calcd for C<sub>8</sub>H<sub>15</sub>O<sub>4</sub>S: 207.0686, found 207.0687 [M+H<sup>+</sup>].

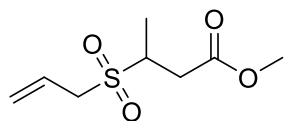

**15b**: <sup>1</sup>H NMR (500 MHz, CDCl<sub>3</sub>): 5.93 (1 H, ddt, *J* = 17.4, 10.1, 7.4 Hz), 5.49 (2 H, dd, *J* = 18.7, 13.7 Hz), 3.84 – 3.66 (5 H, m), 3.60 (1 H, ddd, *J* = 9.4, 6.9, 4.4 Hz), 3.06 (1 H, dd, *J* = 16.7, 4.3 Hz), 2.50 (1 H, dd, *J* = 16.7, 9.3 Hz), 1.43 (3 H, d, *J* = 6.9 Hz) ppm. – <sup>13</sup>C NMR (125 MHz, CDCl<sub>3</sub>): 170.8, 77.4, 77.2, 76.9, 55.6, 52.8, 52.5, 33.7, 14.2 ppm. – IR: 3504, 3005, 1706, 1422, 1362, 1223, 1134, 1092, 657, 615, 526 cm<sup>-1</sup>. – HRMS calcd for C<sub>8</sub>H<sub>15</sub>O<sub>4</sub>S: 207.0686, found 207.0687 [M+H<sup>+</sup>].

### Photoinduced C–H sulfination of ethyl cyclobutanecarboxylate: sulfone **16a,b**

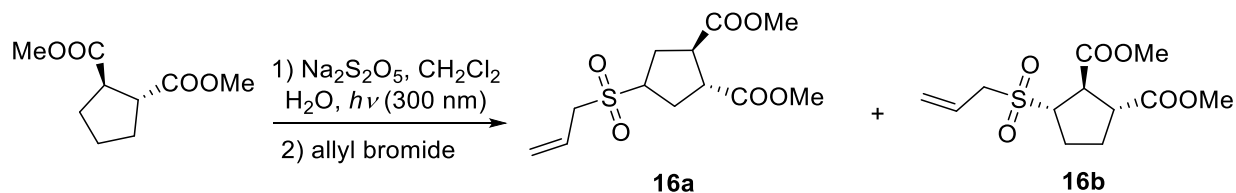

According to GP1, a stirred mixture of dichloromethane (4 mL) and Na<sub>2</sub>S<sub>2</sub>O<sub>5</sub> (380 mg, 2 mmol) was degassed with Ar for 5 min in a quartz test-tube. Ethyl cyclobutanecarboxylate (37 mg, 0.2 mmol) and water (1.5 mL, degassed prior to use) were then added. The solution was stirred vigorously and irradiated at 25 °C for 16 h in a Rayonet RPR-100 photochemical reactor. The reaction mixture was transferred into a pressure tube, allyl bromide (0.2 mL, 2 mmol) was added, and the reaction mixture was stirred at 60 °C for 4 h according to GP3. The reaction mixture was then extracted with EtOAc (3 × 15 mL). The organic phases were combined, dried over anhydrous Na<sub>2</sub>SO<sub>4</sub> and concentrated under reduced pressure. The crude product was purified by flash chromatography on silica gel (EtOAc/hexane, 1 : 5 v/v) to give two separable regioisomers (43 mg, 75%, 1 : 1.3 ratio of sulfones **16a** and **16b**) as a colorless oil.

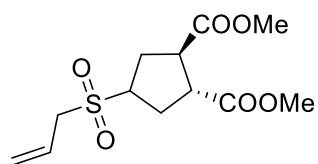

**16a:**  $^1\text{H}$  NMR (500 MHz,  $\text{CDCl}_3$ ): 5.96–5.81 (1 H, m), 5.46 (2 H, dd,  $J = 21.6, 13.6$  Hz), 3.74–3.66 (8 H, m), 3.66–3.56 (1 H, m), 3.36 (1 H, dd,  $J = 16.6, 8.6$  Hz), 3.19 (1 H, dd,  $J = 18.3, 8.5$  Hz), 2.57–2.29 (3 H, m), 2.24 (1 H, dt,  $J = 14.2, 8.8$  Hz) ppm. –  $^{13}\text{C}$  NMR (125 MHz,  $\text{CDCl}_3$ ): 173.8, 172.6, 124.8, 58.1, 56.9, 52.5, 52.5, 47.0, 45.9, 30.0, 29.7 ppm. – IR: 3019, 1732, 1214, 1133, 908, 750, 733, 670, 651, 632, 534  $\text{cm}^{-1}$ . – HRMS calcd for  $\text{C}_{12}\text{H}_{19}\text{O}_6\text{S}$ : 291.0897, found 291.0909 [ $\text{M}+\text{H}^+$ ].

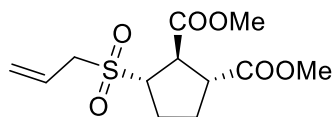

**16b:**  $^1\text{H}$  NMR (500 MHz,  $\text{CDCl}_3$ ): 5.89 (1 H, dq,  $J = 10.0, 7.4$  Hz), 5.44 (2 H, dd,  $J = 19.7, 13.8$  Hz), 3.92–3.81 (1 H, m), 3.82–3.62 (9 H, m), 3.10 (1 H, q,  $J = 8.3$  Hz), 2.36 (1 H, dd,  $J = 5.0, 1.4$  Hz), 2.14–2.00 (3 H, m) ppm. –  $^{13}\text{C}$  NMR (125 MHz,  $\text{CDCl}_3$ ): 172.8, 172.6, 124.9, 124.6, 62.3, 56.8, 52.9, 52.5, 49.0, 47.8, 29.8, 26.7 ppm. – IR: 2954, 1728, 1640, 1437, 1640, 1437, 1377, 1291, 1265, 1223, 1199, 1173, 1128, 1083, 997, 939, 878, 792, 633, 530  $\text{cm}^{-1}$ . – HRMS calcd for  $\text{C}_{12}\text{H}_{19}\text{O}_6\text{S}$ : 291.0897, found 291.0905 [ $\text{M}+\text{H}^+$ ].

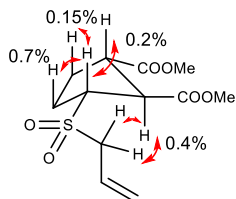

### Photoinduced C–H sulfination of isobutyl acetate: sulfone 17a-c

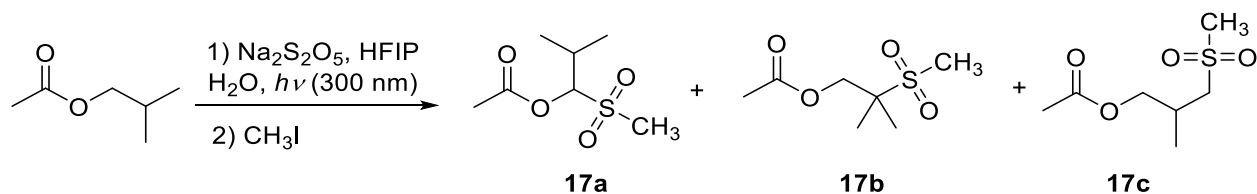

According to GP1, a stirred mixture of hexafluoroisopropanol (3 mL) and  $\text{Na}_2\text{S}_2\text{O}_5$  (57 mg, 0.3 mmol) was degassed with Ar for 5 min in a quartz test-tube. Isobutyl acetate (23 mg, 0.2 mmol) and water (0.75 mL, degassed prior to use) were then added. The solution was stirred vigorously and irradiated at 25 °C for 16 h in a Rayonet RPR-100 photochemical reactor. The reaction mixture was transferred into a pressure tube, iodomethane (0.1 mL, 2 mmol) was added, and the reaction mixture was stirred at 60 °C for 4 h according to GP3. The reaction mixture was then extracted with EtOAc ( $3 \times 15$  mL). The organic phases

were combined, dried over anhydrous Na<sub>2</sub>SO<sub>4</sub> and concentrated under reduced pressure to give regioisomers **17a-c** (26 mg, 66%, 16 : 8 : 1 ratio of isomers **17b**, **17c**, and **17a**) as a colorless oil.

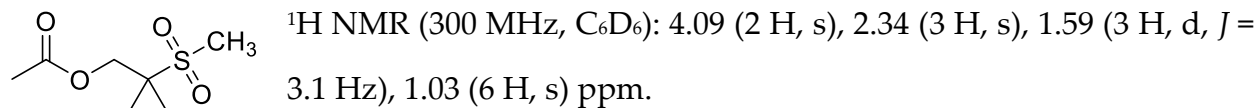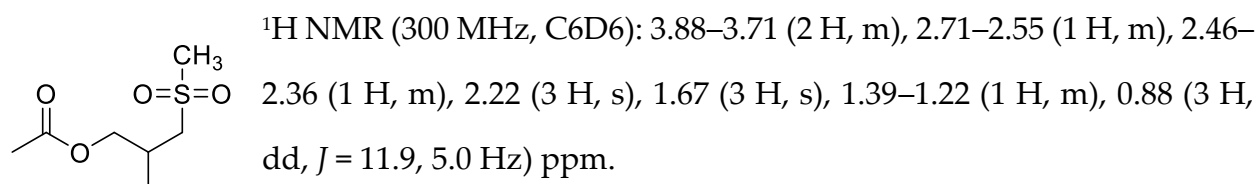

<sup>13</sup>C NMR (75 MHz, C<sub>6</sub>D<sub>6</sub>, mixture of isomers): 170.0, 169.3, 169.1, 88.5, 67.5, 66.8, 60.8, 57.3, 41.3, 39.2, 37.2, 28.5, 28.0, 20.4, 20.2, 19.8, 19.7, 18.3, 17.3, 17.0 ppm. – IR: 3529, 2934, 1743, 1709, 1645, 1368, 1291, 1231, 1117, 1046, 957, 764, 645, 597, 528 cm<sup>-1</sup>. – HRMS calcd for C<sub>7</sub>H<sub>15</sub>O<sub>4</sub>S: 195.0686, found 195.0685 [M+H<sup>+</sup>].

### Photoinduced C–H sulfination of pentanenitrile: sulfone **18a,b**

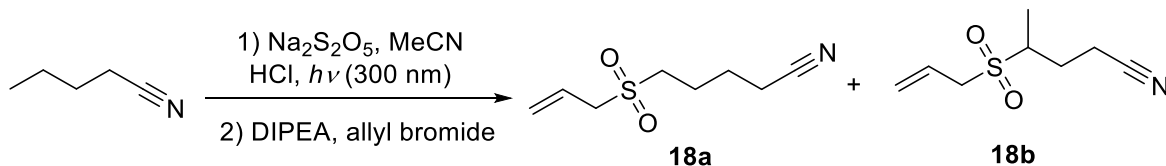

According to GP2, a stirred mixture of MeCN (5 mL) and Na<sub>2</sub>S<sub>2</sub>O<sub>5</sub> (570 mg, 3 mmol) was degassed with Ar for 5 min in a quartz test-tube. Pentanenitrile (21 mg, 0.25 mmol) and 12M aqueous HCl (0.25 mL) were then added. The solution was stirred vigorously and irradiated at 25 °C for 16 h in a Rayonet RPR-100 photochemical reactor. The reaction mixture was transferred into a pressure tube, *N,N*-diisopropylethylamine (0.5 mL, 3 mmol) and allyl bromide (0.2 mL, 2 mmol) were added, and the reaction mixture was stirred at 60 °C for 4 h according to GP4. The reaction mixture was then extracted with EtOAc (3 × 15 mL). The organic phases were combined, dried over anhydrous Na<sub>2</sub>SO<sub>4</sub> and concentrated under reduced pressure. The crude product was purified by flash

chromatography on silica gel (EtOAc/hexane, 1 : 5 v/v) to give two separable regioisomers (28 mg, 60%, 2 : 1 ratio of isomers **18b** and **18a**) as colorless oils.

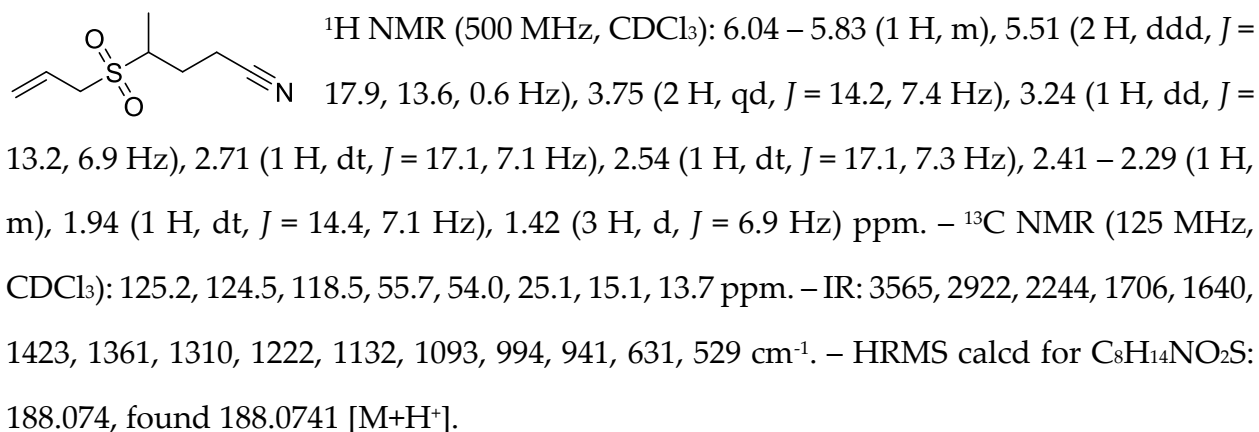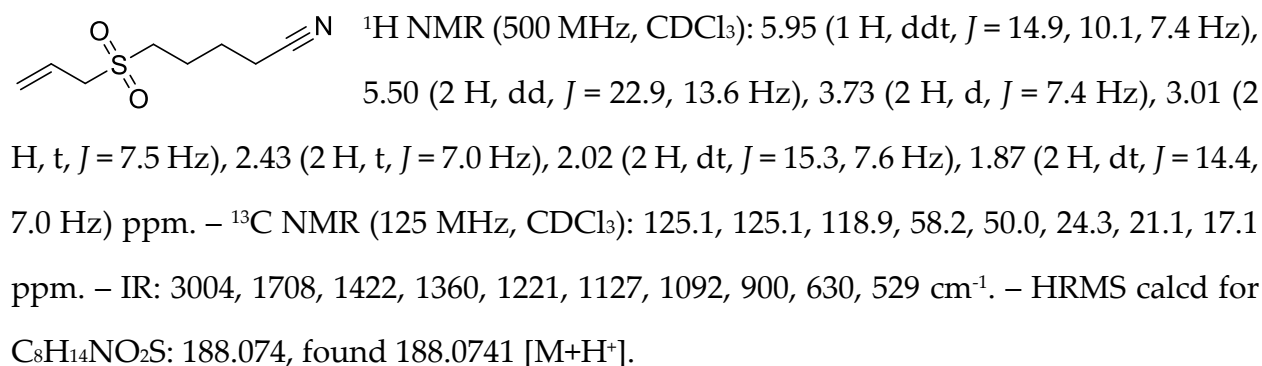

### Photoinduced C–H sulfination of cyclopentanecarbonitrile: sulfone **19a-c**

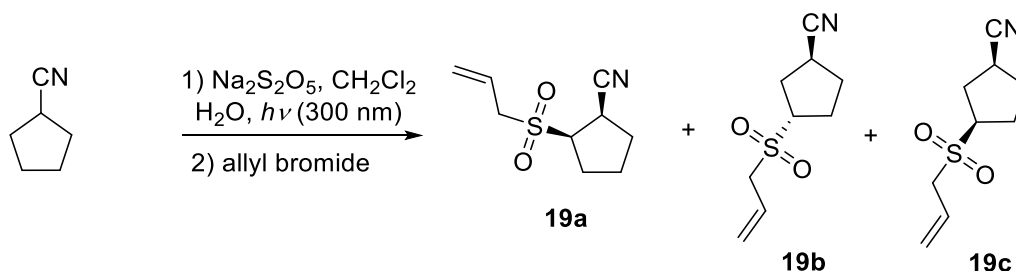

According to GP1, a stirred mixture of dichloromethane (4 mL) and Na<sub>2</sub>S<sub>2</sub>O<sub>5</sub> (380 mg, 2 mmol) was degassed with Ar for 5 min in a quartz test-tube. Cyclopentanecarbonitrile (19 mg, 0.2 mmol) and water (1.5 mL, degassed prior to use) were then added. The solution was stirred vigorously and irradiated at 25 °C for 16 h in a Rayonet RPR-100 photochemical reactor. The reaction mixture was transferred into a pressure tube, allyl

bromide (0.2 mL, 2 mmol) was added, and the reaction mixture was stirred at 60 °C for 4 h according to GP3. The reaction mixture was then extracted with EtOAc (3 × 15 mL). The organic phases were combined, dried over anhydrous Na<sub>2</sub>SO<sub>4</sub> and concentrated under reduced pressure. The crude product was purified by flash chromatography on silica gel (EtOAc/hexane, 1 : 5 v/v) to give three separable regioisomers (28 mg, 70%, 1 : 3.3 : 1.3 ratio of sulfones **19a**, *trans*-**19b**, and *cis*-**19b**) as a colorless oil.

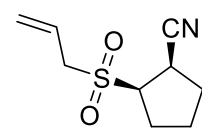 **19a**: <sup>1</sup>H NMR (500 MHz, CDCl<sub>3</sub>): 5.95 (1 H, ddt, *J* = 17.4, 10.1, 7.4 Hz), 5.61–5.52 (2 H, m), 3.88–3.67 (3 H, m), 3.32 (1 H, dd, *J* = 15.1, 7.2 Hz), 2.38–2.10 (3 H, m), 2.05 (1 H, td, *J* = 14.3, 7.2 Hz), 1.91 (2 H, p, *J* = 7.0 Hz) ppm. – <sup>13</sup>C NMR (125 MHz, CDCl<sub>3</sub>): 125.8, 124.3, 120.5, 62.7, 57.5, 32.5, 30.0, 26.6, 25.4 ppm. – IR: 3006, 1709, 1421, 1359, 1220, 1092, 902, 756, 665, 627, 529 cm<sup>-1</sup>. – HRMS calcd for C<sub>9</sub>H<sub>14</sub>NO<sub>2</sub>S: 200.074, found 200.0744 [M+H<sup>+</sup>].

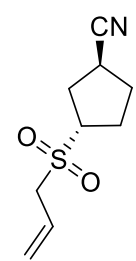 *trans*-**19b**: <sup>1</sup>H NMR (500 MHz, CDCl<sub>3</sub>): 5.92 (1 H, ddt, *J* = 17.4, 10.1, 7.4 Hz), 5.63–5.35 (2 H, m), 3.72 (2 H, d, *J* = 8.0 Hz), 3.70–3.64 (1 H, m), 3.12–3.01 (1 H, m), 2.55 (1 H, ddd, *J* = 14.0, 7.9, 5.9 Hz), 2.34 – 2.19 (4 H, m), 2.07–1.96 (1 H, m) ppm. – <sup>13</sup>C NMR (125 MHz, CDCl<sub>3</sub>): 125.0, 124.8, 121.2, 57.9, 56.9, 31.4, 31.0, 28.6, 25.8 ppm. – IR: 3019, 1710, 1362, 1215, 909, 751, 670, 632, 531 cm<sup>-1</sup>. – HRMS calcd for C<sub>9</sub>H<sub>14</sub>NO<sub>2</sub>S: 200.074, found 200.0741 [M+H<sup>+</sup>].

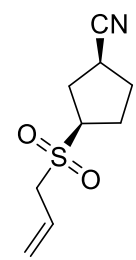 *cis*-**19b**: <sup>1</sup>H NMR (500 MHz, CDCl<sub>3</sub>): 5.93 (1 H, ddt, *J* = 17.4, 10.1, 7.4 Hz), 5.48 (2 H, ddd, *J* = 18.1, 13.6, 0.8 Hz), 3.72 (2 H, d, *J* = 7.4 Hz), 3.58–3.46 (1 H, m), 2.82 (1 H, ddd, *J* = 15.1, 8.6, 4.9 Hz), 2.55–2.44 (1 H, m), 2.42–2.31 (2 H, m), 2.24–1.95 (3 H, m). – <sup>13</sup>C NMR (125 MHz, CDCl<sub>3</sub>): 124.9, 124.8, 120.5, 58.3, 57.0, 31.2, 30.7, 28.5, 26.0 ppm. – IR: 3019, 1709, 1418, 1360, 1220, 1091, 912, 751, 734, 665, 648, 623, 529 cm<sup>-1</sup>. – HRMS HMRS calcd for C<sub>9</sub>H<sub>14</sub>NO<sub>2</sub>S: 200.074, found 200.0743 [M+H<sup>+</sup>].



**Photoinduced C–H sulfination of 1-ethyl-4-fluorobenzene: 1-(1-(allylsulfonyl)ethyl)-4-fluorobenzene (20)**

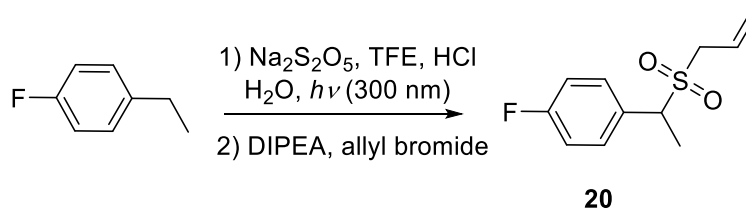

According to GP2, a stirred mixture of trifluoroethanol (3 mL) and Na<sub>2</sub>S<sub>2</sub>O<sub>5</sub> (285 mg, 1.5 mmol) was degassed with Ar for 5 min in a quartz test-tube. 1-Ethyl-4-fluorobenzene (29 mg, 0.2 mmol), water (1.5 mL, degassed prior to use) and 12M aqueous HCl (0.13 mL) were then added. The solution was stirred vigorously and irradiated at 25 °C for 16 h in a Rayonet RPR-100 photochemical reactor. The reaction mixture was transferred into a pressure tube, *N,N*-diisopropylethylamine (0.5 mL, 3 mmol) and allyl bromide (0.2 mL, 2 mmol) were added, and the reaction mixture was stirred at 60 °C for 4 h according to GP4. The reaction mixture was then extracted with EtOAc (3 × 15 mL). The organic phases were combined, dried over anhydrous Na<sub>2</sub>SO<sub>4</sub> and concentrated under reduced pressure. The crude product was purified by flash chromatography on silica gel (EtOAc/hexane, 1 : 5 v/v) to give sulfone **20** (29 mg, 64%) as a colorless oil.

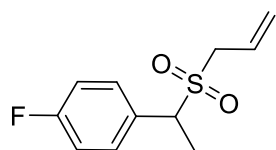

<sup>1</sup>H NMR (500 MHz, CDCl<sub>3</sub>): 7.42 (2 H, dd, *J* = 7.5, 5.3 Hz), 7.09 (1 H, t, *J* = 8.3 Hz), 5.97 – 5.70 (1 H, m), 5.46 (1 H, d, *J* = 10.0 Hz), 5.32 (1 H, d, *J* = 17.1 Hz), 4.24 (1 H, dd, *J* = 13.7, 6.7 Hz), 3.50 (2 H, d, *J* = 4.7 Hz), 1.75 (3 H, d, *J* = 7.0 Hz) ppm. – <sup>13</sup>C NMR (125 MHz, CDCl<sub>3</sub>): 164.2, 162.2, 131.1, 131.1, 130.1, 130.0, 124.8, 124.7, 116.2, 116.1, 61.2, 55.1, 14.3 ppm. – <sup>19</sup>F NMR (471 MHz, CDCl<sub>3</sub>): –112.0 ppm. – IR: 3003, 1709, 1421, 1359, 1220, 1092, 901, 684, 629, 529 cm<sup>-1</sup>. – HRMS calcd for C<sub>11</sub>H<sub>14</sub>FO<sub>2</sub>S: 229.0693, found 229.0696 [M+H<sup>+</sup>].

### Photoinduced C–H sulfination of 1-chlorobutane: sultine 21a,b<sup>9</sup>

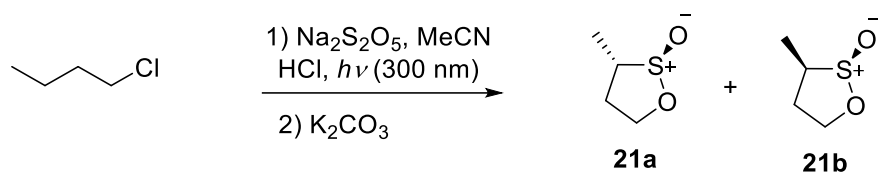

According to GP2, a stirred mixture of MeCN (5 mL) and Na<sub>2</sub>S<sub>2</sub>O<sub>5</sub> (570 mg, 3 mmol) was degassed with Ar for 5 min in a quartz test-tube. 1-Chlorobutane (28 mg, 0.3 mmol) and 12M aqueous HCl (0.25 mL) were then added. The solution was stirred vigorously and irradiated at 25 °C for 16 h in a Rayonet RPR-100 photochemical reactor. The reaction mixture was transferred into a pressure tube, potassium carbonate (828 mg, 5 mmol) was added, and the reaction mixture was stirred at 80 °C for 8 h. The reaction mixture was then filtered. The organic phases was dried over anhydrous Na<sub>2</sub>SO<sub>4</sub> and concentrated under reduced pressure. The crude product was purified by flash chromatography on silica gel (EtOAc/hexane, 1 : 5 v/v) to give two separable isomers (18 mg, 52%, 1 : 3.2 ratio of  $\gamma$ -sultines **21b** and **21a** as a colorless oil.

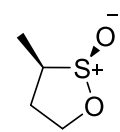 **21b**: <sup>1</sup>H NMR (500 MHz, CDCl<sub>3</sub>): 4.85–4.74 (1 H, m), 4.51 (2 H, dd, *J* = 15.7, 8.3 Hz), 3.40–3.29 (1 H, m), 2.75 (1 H, dq, *J* = 12.9, 8.3 Hz), 1.95–1.82 (1 H, m), 1.22 (3 H, d, *J* = 7.4 Hz) ppm. – <sup>13</sup>C NMR (125 MHz, CDCl<sub>3</sub>): 74.9, 66.8, 30.3, 13.3 ppm. – IR: 3004, 2359, 1709, 1421, 1358, 1220, 1092, 901, 685, 628, 528 cm<sup>-1</sup>.

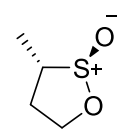 **21a**: <sup>1</sup>H NMR (500 MHz, CDCl<sub>3</sub>): 4.77 (1 H, td, *J* = 8.6, 2.5 Hz), 4.32 (2 H, ddd, *J* = 10.0, 8.6, 7.0 Hz), 3.14–2.99 (1 H, m), 2.33–2.11 (2 H, m), 1.40 (3 H, d, *J* = 6.7 Hz) ppm. – <sup>13</sup>C NMR (125 MHz, CDCl<sub>3</sub>): 75.4, 62.8, 29.9, 11.3 ppm. – IR: , 2931, 2858, 1455, 1318, 1261, 1173, 1120, 1072, 1021, 952, 927, 865, 766, 715, 664, 646, 631, 614, 593, 584, 561, 555, 536, 523 cm<sup>-1</sup>.

## Photoinduced C–H sulfination of *N*-butyl-2,2,2-trifluoroacetamide: sulfone **22a-c**

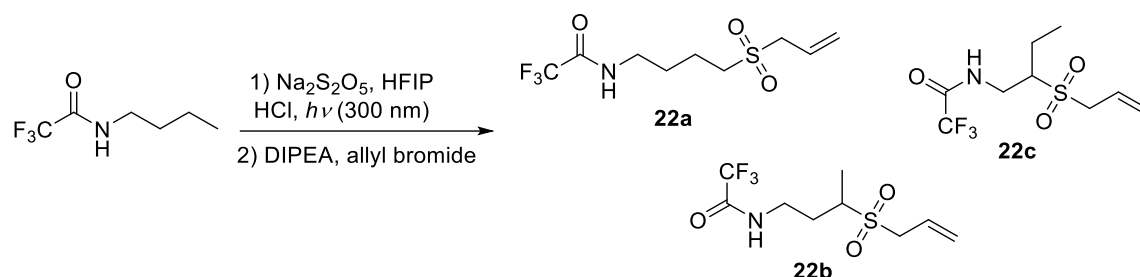

According to GP2, a stirred mixture of hexafluoroisopropanol (5 mL) and  $\text{Na}_2\text{S}_2\text{O}_5$  (570 mg, 3 mmol) was degassed with Ar for 5 min in a quartz test-tube. *N*-butyl-2,2,2-trifluoroacetamide (51 mg, 0.3 mmol) and 12M aqueous HCl (0.25 mL) were then added. The solution was stirred vigorously and irradiated at 25 °C for 16 h in a Rayonet RPR-100 photochemical reactor. The reaction mixture was transferred into a pressure tube, *N,N*-diisopropylethylamine (0.5 mL, 3 mmol) and allyl bromide (0.26 mL, 3 mmol) were added, and the reaction mixture was stirred at 60 °C for 4 h according to GP4. The reaction mixture was then extracted with EtOAc (3 × 15 mL). The organic phases were combined, dried over anhydrous  $\text{Na}_2\text{SO}_4$  and concentrated under reduced pressure. The crude product was purified by flash chromatography on silica gel (EtOAc/hexane, 1 : 5 v/v) to give three separable isomers (51 mg, 62%, 1 : 2.9 : 1.2 ratio of sulfones **22a**, **22b**, and **22c**) as a colorless oil.

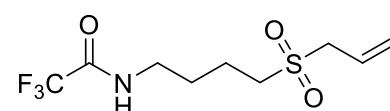 **22a**:  $^1\text{H}$  NMR (500 MHz,  $\text{CDCl}_3$ ): 6.66 (1 H, s), 6.01 – 5.83 (1 H, m), 5.62 – 5.33 (2 H, m), 3.72 (2 H, d,  $J = 7.4$  Hz), 3.42 (2 H, q,  $J = 6.5$  Hz), 3.01 (2 H, t,  $J = 7.5$  Hz), 1.94 – 1.85 (2 H, m), 1.84 – 1.73 (2 H, m) ppm. –  $^{13}\text{C}$  NMR (125 MHz,  $\text{CDCl}_3$ ): 157.8, 157.5, 125.0, 119.7, 117.1, 114.8, 112.6, 100.1, 58.3, 50.3, 39.2, 27.8, 19.0 ppm. –  $^{19}\text{F}$  NMR (471 MHz,  $\text{CDCl}_3$ ): –75.9 ppm. – IR: 3003, 1709, 1422, 1358, 1220, 1092, 900, 685, 629, 528  $\text{cm}^{-1}$ . – HRMS calcd for  $\text{C}_9\text{H}_{15}\text{F}_3\text{NO}_3\text{S}$ : 274.0719, found 274.0723  $[\text{M}+\text{H}^+]$ .

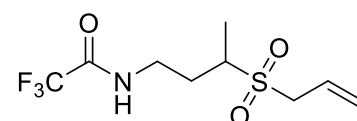 **22b**:  $^1\text{H}$  NMR (500 MHz,  $\text{CDCl}_3$ ): 6.93 (1 H, s), 6.04 – 5.79 (1 H, m), 5.50 (2 H, dd,  $J = 21.6, 13.6$  Hz), 3.75 (2 H, qd,  $J = 14.2, 7.4$  Hz).

Hz), 3.66 – 3.45 (2 H, m), 3.14 (1 H, dd,  $J = 13.4, 6.7$  Hz), 2.24 (1 H, dt,  $J = 21.1, 6.6$  Hz), 1.96 (1 H, td,  $J = 13.2, 6.6$  Hz), 1.44 (3 H, d,  $J = 6.9$  Hz) ppm. –  $^{13}\text{C}$  NMR (125 MHz,  $\text{CDCl}_3$ ): 158.2, 157.9, 157.6, 157.3, 125.1, 124.5, 119.3, 117.0, 114.8, 112.5, 55.4, 53.7, 37.1, 28.4, 14.4. ppm. –  $^{19}\text{F}$  NMR (471 MHz,  $\text{CDCl}_3$ ): –75.9 ppm. – IR: 3004, 1709, 1421, 1358, 1220, 1092, 901, 683, 627, 528  $\text{cm}^{-1}$ . – HRMS calcd for  $\text{C}_9\text{H}_{15}\text{F}_3\text{NO}_3\text{S}$ : 274.0719, found 274.0722  $[\text{M}+\text{H}^+]$ .

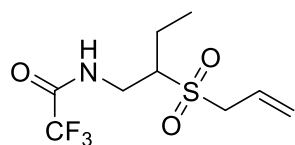

**22c:**  $^1\text{H}$  NMR (500 MHz,  $\text{CDCl}_3$ ): 7.32 (1 H, s), 6.07–5.79 (1 H, m), 5.52 (2 H, dd,  $J = 33.9, 13.8$  Hz), 3.91 (ddd,  $J = 15.0, 6.0, 2.2$  Hz, 1H), 3.85–3.68 (3 H, m), 3.13–2.99 (1 H, m), 2.04–1.89 (1 H, m), 1.79–1.62 (1 H, m), 1.12 (3 H, t,  $J = 7.5$  Hz) ppm. –  $^{13}\text{C}$  NMR (125 MHz,  $\text{CDCl}_3$ ): 157.7, 157.4, 125.7, 124.2, 119.2, 116.9, 114.6, 112.4, 61.0, 56.8, 36.2, 19.7, 11.1 ppm. –  $^{19}\text{F}$  NMR (471 MHz,  $\text{CDCl}_3$ ): –76.1 ppm. – IR: 3586, 3004, 2364, 1708, 1421, 1358, 1220, 1092, 920, 734, 667, 626, 529  $\text{cm}^{-1}$ . – HRMS calcd for  $\text{C}_9\text{H}_{15}\text{F}_3\text{NO}_3\text{S}$ : 274.0719, found 274.0718  $[\text{M}+\text{H}^+]$ .

### Photoinduced C–H sulfination of methyl (2,2,2-trifluoroacetyl)-D-valinate: methyl C<sup>4</sup>-(allylsulfonyl)(2,2,2-trifluoroacetyl)-L-valinate (**23**)

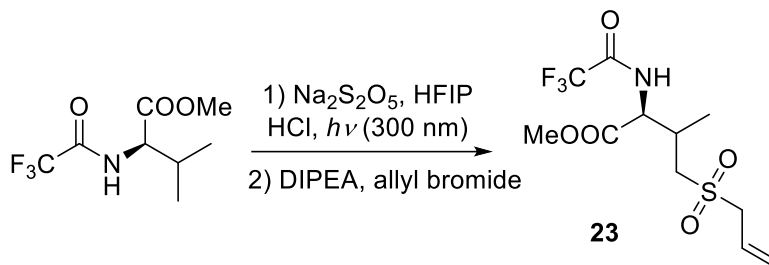

According to GP2, a stirred mixture of hexafluoroisopropanol (5 mL) and  $\text{Na}_2\text{S}_2\text{O}_5$  (570 mg, 3 mmol) was degassed with Ar for 5 min in a quartz test-tube. Methyl (2,2,2-trifluoroacetyl)-D-valinate (45 mg, 0.2 mmol) and 12M aqueous HCl (0.25 mL) were then added. The solution was stirred vigorously and irradiated at 25 °C for 24 h in a Rayonet RPR-100 photochemical reactor. The reaction mixture was transferred into a pressure tube, *N,N*-diisopropylethylamine (0.5 mL, 3 mmol) and allyl bromide (0.2 mL, 2 mmol) were added, and the reaction mixture was stirred at 60 °C for 4 h according to GP4. The

reaction mixture was then extracted with EtOAc (3 × 15 mL). The organic phases were combined, dried over anhydrous Na<sub>2</sub>SO<sub>4</sub> and concentrated under reduced pressure. The crude product was purified by flash chromatography on silica gel (EtOAc/hexane, 1 : 5 v/v) to give the product (34 mg, 52%) as a colorless oil.

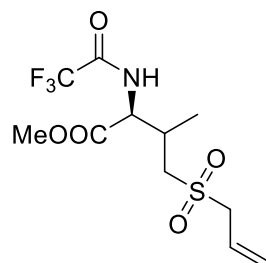

<sup>1</sup>H NMR (500 MHz, CDCl<sub>3</sub>): 7.34 (1 H, s), 6.00–5.83 (1 H, m), 5.60–5.41 (2 H, m), 4.75 (1 H, ddd, *J* = 12.3, 7.7, 3.9 Hz), 3.86–3.68 (5 H, m), 3.26 (1 H, ddd, *J* = 76.7, 14.2, 5.3 Hz), 3.04–2.66 (2 H, m), 1.18 (3 H, dd, *J* = 6.9, 4.2 Hz) ppm. – <sup>13</sup>C NMR (125 MHz, CDCl<sub>3</sub>): 169.8, 169.6, 157.9, 157.6, 157.6, 157.2, 125.5, 125.4, 125.1, 124.9, 124.8, 123.7, 118.6, 116.9, 116.8, 114.6, 114.5, 112.3, 59.3, 58.4, 56.3, 56.29, 53.7, 53.5, 53.4, 31.0, 30.9, 17.0, 16.2 ppm. – <sup>19</sup>F NMR (471 MHz, CDCl<sub>3</sub>): –75.7 ppm. – IR: 2957, 1737, 1465, 1373, 1242, 1047, 914, 758, 735, 632, 609, 534 cm<sup>-1</sup>. – HRMS calcd for C<sub>11</sub>H<sub>17</sub>F<sub>3</sub>NO<sub>5</sub>S: 332.0774, found 332.0781 [M+H<sup>+</sup>].

### Photoinduced C–H sulfination of methyl 2-(4-isobutylphenyl)propanoate: sulfone 24a,b

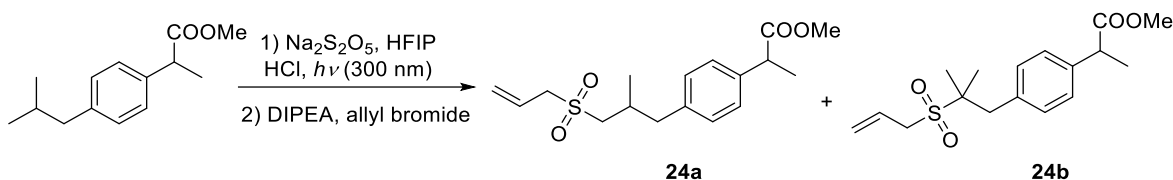

According to GP1, a stirred mixture of hexafluoroisopropanol (4.5 mL) and Na<sub>2</sub>S<sub>2</sub>O<sub>5</sub> (570 mg, 3 mmol) was degassed with Ar for 5 min in a quartz test-tube. Methyl 2-(4-isobutylphenyl)propanoate (66 mg, 0.3 mmol) and 12M aqueous HCl (0.25 mL) were then added. The solution was stirred vigorously and irradiated at 25 °C for 16 h in a Rayonet RPR-100 photochemical reactor. The reaction mixture was transferred into a pressure tube, *N,N*-diisopropylethylamine (0.5 mL, 3 mmol) and allyl bromide (0.26 mL, 3 mmol) were added, and the reaction mixture was stirred at 60 °C for 4 h according to GP3. The reaction mixture was then extracted with EtOAc (3 × 15 mL). The organic phases were combined, dried over anhydrous Na<sub>2</sub>SO<sub>4</sub> and concentrated under reduced pressure. The

crude product was purified by flash chromatography on silica gel (EtOAc/hexane, 1:3 v/v) to give inseparable product (63 mg, 65%, 1:1.2 ratio of isomers **24a** and **24b**) as a colorless oil.

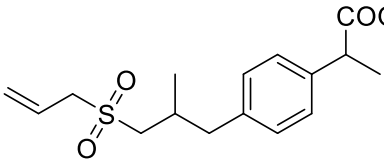
**24a:** <sup>1</sup>H NMR (500 MHz, CDCl<sub>3</sub>): 7.26–7.22 (2 H, m), 7.17–7.09 (2 H, m), 5.81 (1 H, ddd, *J* = 24.6, 9.8, 7.5 Hz), 5.31 (2 H, dd, *J* = 59.3, 13.6 Hz), 3.74–3.69 (1 H, m), 3.66 (3 H, s), 3.61 (2 H, d, *J* = 7.4 Hz), 3.00 (1 H, dd, *J* = 14.0, 4.5 Hz), 2.77–2.63 (3 H, m), 2.46 (1 H, dt, *J* = 19.0, 6.8 Hz), 1.49 (3 H, d, *J* = 7.1 Hz), 1.17 (3 H, d, *J* = 6.7 Hz) ppm.

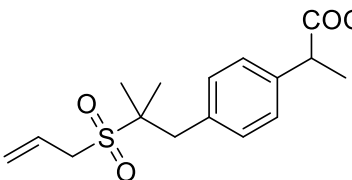
**24b:** <sup>1</sup>H NMR (500 MHz, CDCl<sub>3</sub>): 7.27–7.21 (2 H, m), 7.18–7.08 (2 H, m), 5.99 (1 H, ddt, *J* = 17.3, 10.1, 7.2 Hz), 5.47 (2 H, dd, *J* = 29.3, 13.6 Hz), 3.71 (2 H, d, *J* = 6.5 Hz), 3.77–3.65 (1 H, m), 3.67 (3 H, s), 3.07 (2 H, s), 1.50 (3 H, d, *J* = 7.1 Hz), 1.34 (6 H, s) ppm.

<sup>13</sup>C NMR (125 MHz, CDCl<sub>3</sub>, mixture of regioisomers): 175.1, 175.0, 139.7, 139.0, 137.9, 133.8, 131.4, 129.7, 127.8, 127.6, 125.3, 124.6, 124.5, 64.0, 58.9, 56.2, 52.5, 52.2, 52.18, 45.2, 42.6, 40.2, 30.4, 20.7, 20.3, 18.7 ppm. – IR: 2922, 1732, 1512, 1455, 1290, 1208, 1162, 1106, 936, 645, 619 cm<sup>-1</sup>. – HRMS calcd for C<sub>17</sub>H<sub>24</sub>O<sub>4</sub>S: 325.1468, found 325.1467 [M+H<sup>+</sup>].

### Photoinduced C–H sulfination of 1,4-dioxane: 2-(allylsulfonyl)-1,4-dioxane (**25**)

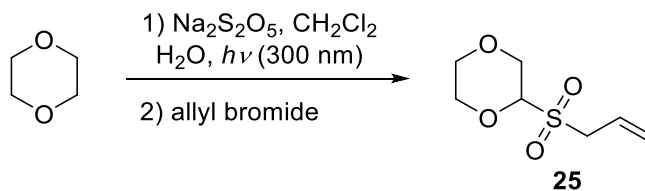

According to GP1, a stirred mixture of dichloromethane (3 mL) and Na<sub>2</sub>S<sub>2</sub>O<sub>5</sub> (76 mg, 0.4 mmol) was degassed with Ar for 5 min in a quartz test-tube. 1,4-Dioxane (18 mg, 0.2 mmol) and water (0.75 mL, degassed prior to use) were then added. The solution was stirred vigorously and irradiated at 25 °C for 16 h in a Rayonet RPR-100 photochemical

reactor. The reaction mixture was transferred into a pressure tube, allyl bromide (0.2 mL, 2 mmol) were added, and the reaction mixture was stirred at 60 °C for 4 h according to GP3. The reaction mixture was then extracted with EtOAc (3 × 15 mL). The organic phases were combined, dried over anhydrous Na<sub>2</sub>SO<sub>4</sub> and concentrated under reduced pressure. The crude product was purified by flash chromatography on neutral aluminum (EtOAc/hexane, 1:3 v/v) to give sulfone **25** (33 mg, 85%) as a colorless oil.

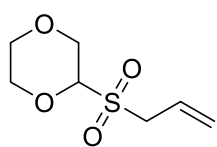

<sup>1</sup>H NMR (500 MHz, CDCl<sub>3</sub>): 5.92–5.79 (1 H, m), 5.49–5.38 (2 H, m), 4.56 (1 H, dd, *J* = 6.5, 3.7 Hz), 4.23–4.16 (1 H, m), 4.03 (2 H, ddd, *J* = 16.0, 12.3, 5.1 Hz), 3.90 (1 H, dd, *J* = 14.1, 8.5 Hz), 3.75–3.62 (4 H, m) ppm. – <sup>13</sup>C NMR (125 MHz, CDCl<sub>3</sub>): 125.2, 124.1, 83.4, 66.0, 65.5, 62.4, 54.7 ppm. – IR: 2957, 2925, 2873, 1743, 1458, 1373, 1237, 1113, 1047, 916, 848, 736, 632, 608, 537 cm<sup>-1</sup>. – HRMS calcd for C<sub>7</sub>H<sub>12</sub>NaO<sub>4</sub>S: 215.0349, found 215.0354 [M+Na<sup>+</sup>].

### Photoinduced C–H sulfination of tetrahydrofuran: 2-(allylsulfonyl)tetrahydrofuran (**26**)

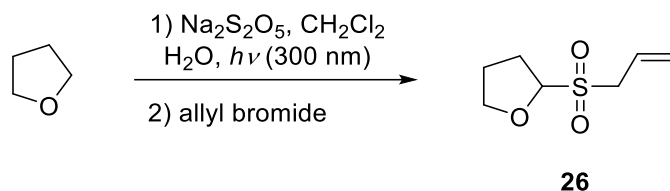

According to GP1, a stirred mixture of dichloromethane (3 mL) and Na<sub>2</sub>S<sub>2</sub>O<sub>5</sub> (76 mg, 0.4 mmol) was degassed with Ar for 5 min in a quartz test-tube. Tetrahydrofuran (14 mg, 0.2 mmol) and water (0.75 mL, degassed prior to use) were then added. The solution was stirred vigorously and irradiated at 25 °C for 16 h in a Rayonet RPR-100 photochemical reactor. The reaction mixture was transferred into a pressure tube, allyl bromide (0.2 mL, 2 mmol) was added, and the reaction mixture was stirred at 60 °C for 4 h according to GPXX. The reaction mixture was then extracted with EtOAc (3 × 15 mL). The organic phases were combined, dried over anhydrous Na<sub>2</sub>SO<sub>4</sub> and concentrated under reduced

pressure. The crude product was purified by flash chromatography on neutral aluminum (EtOAc/hexane, 1:3 v/v) to give sulfone **26** (21 mg, 60%) as a colorless oil.

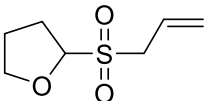 <sup>1</sup>H NMR (500 MHz, CDCl<sub>3</sub>): 5.99 – 5.80 (1 H, m), 5.53 – 5.40 (2 H, m), 4.95 (1 H, dd, *J* = 7.9, 3.9 Hz), 4.15 (1 H, dd, *J* = 15.0, 7.2 Hz), 4.05 (1 H, dt, *J* = 13.2, 6.7 Hz), 3.93 (1 H, dd, *J* = 14.0, 8.6 Hz), 3.69 (1 H, dd, *J* = 13.9, 6.2 Hz), 2.67 – 2.47 (1 H, m), 2.31 – 2.13 (2 H, m), 2.02 – 1.88 (1 H, m) ppm. – <sup>13</sup>C NMR (125 MHz, CDCl<sub>3</sub>): 124.9, 124.6, 89.9, 71.2, 54.2, 25.2, 24.6 ppm. – IR: 1739, 1716, 1364, 1218, 758, 749, 710, 697, 630, 589, 555 cm<sup>-1</sup>. – HRMS calcd for C<sub>7</sub>H<sub>12</sub>NaO<sub>3</sub>S: 199.0399, found 199.0401 [M+Na<sup>+</sup>].

**Photoinduced C–H sulfination of dimethoxymethane: 3-  
(((methoxymethoxy)methyl)sulfonyl)prop-1-ene (27)**

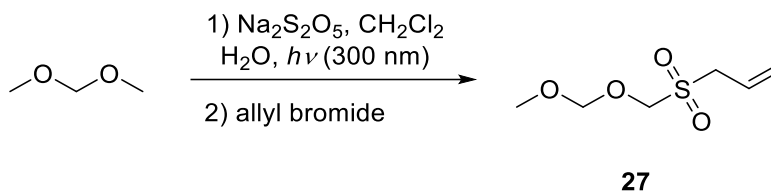

According to GP1, a stirred mixture of dichloromethane (3 mL) and Na<sub>2</sub>S<sub>2</sub>O<sub>5</sub> (152 mg, 0.8 mmol) was degassed with Ar for 5 min in a quartz test-tube. Dimethoxymethane (16 mg, 0.2 mmol) and water (0.75 mL, degassed prior to use) were then added. The solution was stirred vigorously and irradiated at 25 °C for 16 h in a Rayonet RPR-100 photochemical reactor. The reaction mixture was transferred into a pressure tube, allyl bromide (0.2 mL, 2 mmol) were added, and the reaction mixture was stirred at 60 °C for 4 h according to GPXX. The reaction mixture was then extracted with EtOAc (3 × 15 mL). The organic phases were combined, dried over anhydrous Na<sub>2</sub>SO<sub>4</sub> and concentrated under reduced pressure. The crude product was purified by flash chromatography on neutral aluminum (EtOAc/hexane, 1:2 v/v) to give sulfone **27** (28 mg, 78%) as a colorless oil.

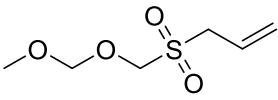 <sup>1</sup>H NMR (500 MHz, CDCl<sub>3</sub>): 5.63 (1 H, ddt, *J* = 16.9, 10.3, 7.4 Hz), 4.99 (2 H, dd, *J* = 12.1, 5.8 Hz), 4.52 (2 H, s), 4.12 (2 H, s), 3.31 (2 H,



d,  $J = 7.4$  Hz), 2.98 (3 H, s) ppm. –  $^{13}\text{C}$  NMR (125 MHz,  $\text{CDCl}_3$ ): 125.4, 123.8, 97.0, 77.2, 55.8, 54.7 ppm. – IR: 2970, 2279, 1712, 1422, 1361, 1219, 1092, 1048, 814, 639, 608, 521  $\text{cm}^{-1}$ . – HRMS calcd for  $\text{C}_6\text{H}_{12}\text{NaO}_4\text{S}$ : 203.0349, found 203.0348 [ $\text{M}+\text{Na}^+$ ].

**Photoinduced C–H sulfination of methyl *tert*-butyl ether: 3-((*tert*-butoxymethyl)sulfonyl)prop-1-ene (28)**

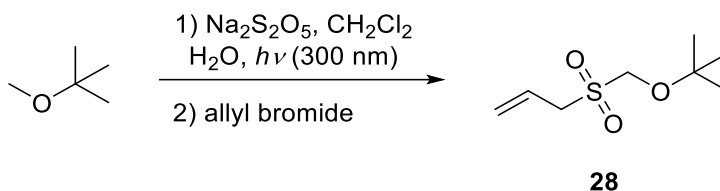

According to GP1, a stirred mixture of dichloromethane (3 mL) and  $\text{Na}_2\text{S}_2\text{O}_5$  (38 mg, 0.2 mmol) was degassed with Ar for 5 min in a quartz test-tube. Methyl *tert*-butyl ether (17 mg, 0.2 mmol) and water (0.75 mL, degassed prior to use) were then added. The solution was stirred vigorously and irradiated at 25 °C for 16 h in a Rayonet RPR-100 photochemical reactor. The reaction mixture was transferred into a pressure tube, allyl bromide (0.2 mL, 2 mmol) were added, and the reaction mixture was stirred at 60 °C for 4 h according to GP3. The reaction mixture was then extracted with EtOAc (3 × 15 mL). The organic phases were combined, dried over anhydrous  $\text{Na}_2\text{SO}_4$  and concentrated under reduced pressure. The crude product was purified by flash chromatography on neutral aluminum (EtOAc/hexane, 1:2 v/v) to give sulfone **28** (19 mg, 50%) as a colorless oil.

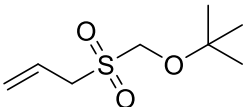

$^1\text{H}$  NMR (500 MHz,  $\text{CDCl}_3$ ): 5.71 (1 H, ddt,  $J = 17.4, 10.0, 7.4$  Hz), 5.03 (2 H, dd,  $J = 21.6, 5.6$  Hz), 4.03 (2 H, s), 3.38 (2 H, d,  $J = 7.4$  Hz), 0.90 (9 H, s) ppm. –  $^{13}\text{C}$  NMR (125 MHz,  $\text{CDCl}_3$ ): 125.7, 123.6, 77.0, 75.6, 54.3, 27.3 ppm. – IR: 3017, 2280, 1712, 1419, 1361, 1330, 1219, 1093, 813, 753, 665, 632, 601, 529  $\text{cm}^{-1}$ . – HRMS calcd for  $\text{C}_8\text{H}_{16}\text{NaO}_3\text{S}$ : 215.0712, found 215.0713 [ $\text{M}+\text{Na}^+$ ].

**Photoinduced C–H sulfination of 15-crown-5: 2-(allylsulfonyl)-1,4,7,10,13-pentaoxacyclopentadecane (**29**)**

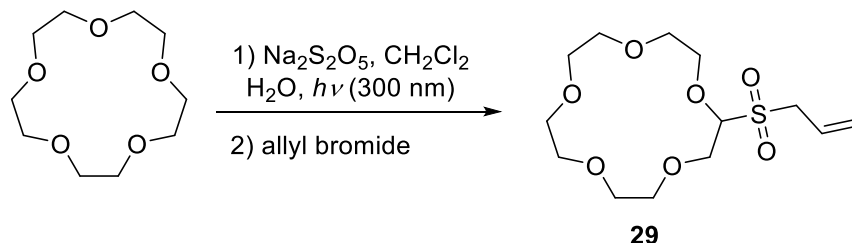

According to GP1, a stirred mixture of dichloromethane (3 mL) and  $\text{Na}_2\text{S}_2\text{O}_5$  (114 mg, 0.6 mmol) was degassed with Ar for 5 min in a quartz test-tube. 15-Crown-5 (44 mg, 0.2 mmol) and water (0.75 mL, degassed prior to use) were then added. The solution was stirred vigorously and irradiated at 25 °C for 16 h in a Rayonet RPR-100 photochemical reactor. The reaction mixture was transferred into a pressure tube, allyl bromide (0.2 mL, 2 mmol) were added, and the reaction mixture was stirred at 60 °C for 4 h according to GP3. The reaction mixture was then extracted with EtOAc (3 × 15 mL). The organic phases were combined, dried over anhydrous  $\text{Na}_2\text{SO}_4$  and concentrated under reduced pressure. The crude product was purified by flash chromatography on neutral aluminum (EtOAc/hexane, 1:1 v/v) to give sulfone **29** (41 mg, 64%) as a colorless oil.

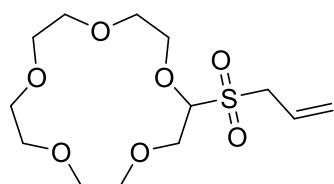

$^1\text{H}$  NMR (500 MHz,  $\text{C}_6\text{D}_6$ ): 5.88 (1 H, ddt,  $J = 17.3, 10.1, 7.4$  Hz), 5.22–5.03 (2 H, m), 4.54 (1 H, t,  $J = 4.8$  Hz), 4.08–3.99 (2 H, m), 3.99–3.92 (1 H, m), 3.90–3.79 (1 H, m), 3.73 (1 H, dd,  $J = 13.8, 7.1$  Hz), 3.61 (1 H, dd,  $J = 13.8, 7.7$  Hz), 3.45–3.16 (14 H, m) ppm. –  $^{13}\text{C}$  NMR (125 MHz,  $\text{C}_6\text{D}_6$ ): 125.1, 123.8, 94.6, 73.1, 71.0, 70.9, 70.88, 70.8, 70.7, 70.64, 69.62, 55.8 ppm. – IR: 2983, 1737, 1446, 1372, 1234, 1096, 1044, 938, 847, 636, 607  $\text{cm}^{-1}$ . – HRMS calcd for  $\text{C}_{13}\text{H}_{24}\text{NaO}_5$ : 347.1135, found 347.1134 [ $\text{M}+\text{Na}^+$ ].

**Photoinduced C–H sulfination of 18-crown-6: 2-(allylsulfonyl)-1,4,7,10,13,16-hexaoxacyclooctadecane (30)**

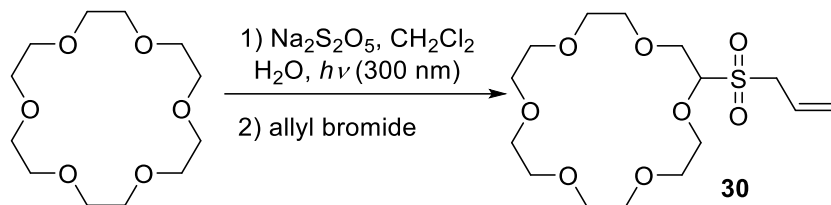

According to GP1, a stirred mixture of dichloromethane (3 mL) and  $\text{Na}_2\text{S}_2\text{O}_5$  (114 mg, 0.6 mmol) was degassed with Ar for 5 min in a quartz test-tube. 18-Crown-6 (53 mg, 0.2 mmol) and water (0.75 mL, degassed prior to use) were then added. The solution was stirred vigorously and irradiated at 25 °C for 16 h in a Rayonet RPR-100 photochemical reactor. The reaction mixture was transferred into a pressure tube, allyl bromide (0.2 mL, 2 mmol) were added, and the reaction mixture was stirred at 60 °C for 4 h according to GP3. The reaction mixture was then extracted with EtOAc (3 × 15 mL). The organic phases were combined, dried over anhydrous  $\text{Na}_2\text{SO}_4$  and concentrated under reduced pressure. The crude product was purified by flash chromatography on neutral aluminum (EtOAc/hexane, 1:1 v/v) to give sulfone **42** (43 mg, 58%) as a colorless oil.

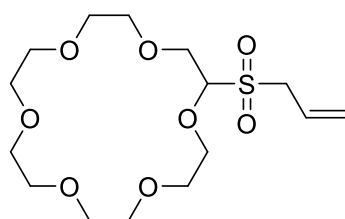

$^1\text{H}$  NMR (500 MHz,  $\text{C}_6\text{D}_6$ ): 5.97 (1, ddt,  $J = 17.4, 10.1, 7.4$  Hz), 5.29–5.15 (2 H, m), 4.52 (1 H, t,  $J = 3.9$  Hz), 4.15–4.01 (2 H, m), 4.01–3.91 (2 H, m), 3.90–3.73 (2 H, m), 3.49–3.16 (18 H, m) ppm.

–  $^{13}\text{C}$  NMR (125 MHz,  $\text{C}_6\text{D}_6$ ): 125.1, 124.0, 94.8, 72.4, 71.3, 71.0,

70.97, 70.93, 70.85, 70.81, 70.76, 69.79, 56.0 ppm. – IR: 3335, 2944, 2831, 1707, 1449, 1230, 1111, 1021, 816, 736, 610, 536  $\text{cm}^{-1}$ . – HRMS calcd for  $\text{C}_{15}\text{H}_{28}\text{NaO}_8\text{S}$ : 391.1397, found 391.1399  $[\text{M}+\text{Na}^+]$ .

**Photoinduced C–H sulfination of (3*R*,3*aR*,6*R*,6*aR*)-3,6-dimethoxyhexahydrofuro[3,2-*b*]furan: sulfone 31a-c**

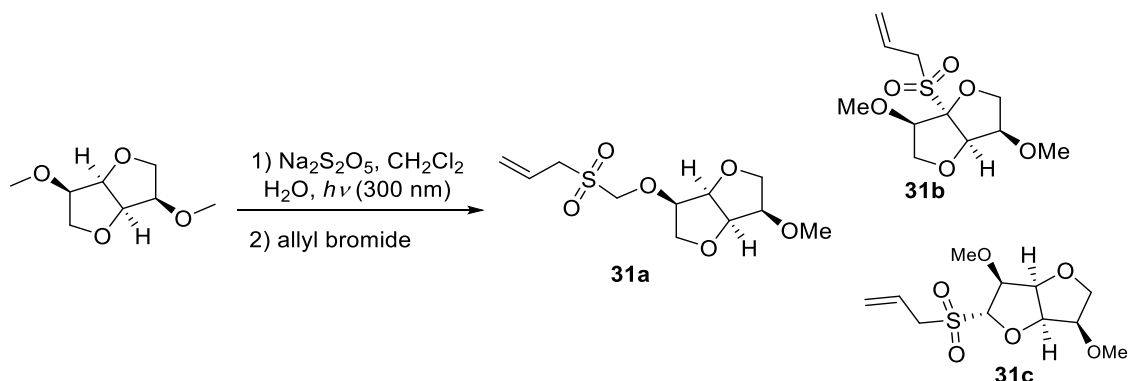

According to GP1, a stirred mixture of dichloromethane (3 mL) and  $\text{Na}_2\text{S}_2\text{O}_5$  (190 mg, 1 mmol) was degassed with Ar for 5 min in a quartz test-tube. (3*R*,3*aR*,6*R*,6*aR*)-3,6-Dimethoxyhexahydrofuro[3,2-*b*]furan (52 mg, 0.3 mmol) and water (0.75 mL, degassed prior to use) were then added. The solution was stirred vigorously and irradiated at 25 °C for 16 h in a Rayonet RPR-100 photochemical reactor. The reaction mixture was transferred into a pressure tube, allyl bromide (0.26 mL, 3 mmol) were added, and the reaction mixture was stirred at 60 °C for 4 h according to GP3. The reaction mixture was then extracted with EtOAc (3 × 15 mL). The organic phases were combined, dried over anhydrous  $\text{Na}_2\text{SO}_4$  and concentrated under reduced pressure. The crude product was purified by flash chromatography on silica gel (EtOAc/hexane, 1:3 v/v) to give three separable regioisomers (51 mg, 61%, 4:3.2:1 ratio of sulfones 31a, 31b, and 31c) as a colorless oil.

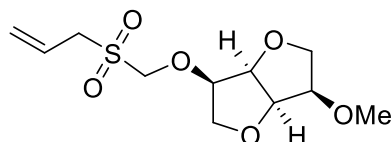

**31a:**  $[\alpha]_D^{21} = -5.0$  (*c* 0.2,  $\text{CDCl}_3$ ). –  $^1\text{H}$  NMR (500 MHz,  $\text{C}_6\text{D}_6$ ): 5.62 (1 H, ddt,  $J = 17.4, 10.1, 7.4$  Hz), 5.06–4.91 (2 H, m), 4.17–4.12 (4 H, m), 3.95 (1 H, t,  $J = 4.9$  Hz), 3.67 (4 H, dtd,  $J = 11.6, 8.5, 6.2$  Hz), 3.47–3.24 (3 H, m), 3.15 (3 H, s) ppm. –  $^{13}\text{C}$  NMR (125 MHz,  $\text{C}_6\text{D}_6$ ): 125.2, 124.1, 82.2, 81.6, 81.4, 80.8, 80.4, 71.5, 71.4, 57.7, 54.3 ppm. – IR: 2930, 1295, 1241, 1221, 1143, 1120, 1091, 1040, 940, 878, 802, 744, 630, 597, 534  $\text{cm}^{-1}$ . – HRMS calcd for  $\text{C}_{11}\text{H}_{19}\text{O}_6\text{S}$ : 279.0897, found 279.0897  $[\text{M}+\text{H}^+]$ .

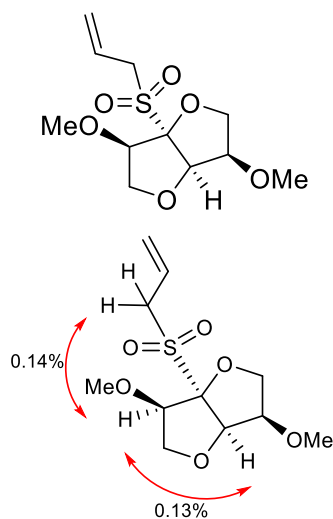

**31b:**  $[\alpha]_D^{21} = +93.9$  (*c* 0.14,  $\text{CDCl}_3$ ). –  $^1\text{H}$  NMR (500 MHz,  $\text{C}_6\text{D}_6$ ): 5.86 (1 H, ddt,  $J = 17.4, 10.1, 7.4$  Hz), 5.15–5.05 (3 H, m), 4.29 (1 H, dd,  $J = 7.3, 6.5$  Hz), 4.21 (1 H, dd,  $J = 9.1, 6.3$  Hz), 3.97 (1 H, dd,  $J = 9.1, 5.6$  Hz), 3.89 (1 H, dd,  $J = 8.5, 6.2$  Hz), 3.83–3.76 (2 H, m), 3.70 (1 H, q,  $J = 5.8$  Hz), 3.59 (1 H, dd,  $J = 13.8, 7.5$  Hz), 3.06 (3 H, s), 2.86 (3 H, s) ppm. –  $^{13}\text{C}$  NMR (125 MHz,  $\text{C}_6\text{D}_6$ ): 124.5, 123.8, 105.9, 82.1, 81.4, 81.2, 75.9, 72.3, 58.3, 58.2, 54.2 ppm. – IR: 2925, 1459, 1327, 1204, 1085, 631, 537  $\text{cm}^{-1}$ . – HRMS calcd for  $\text{C}_{11}\text{H}_{19}\text{O}_6\text{S}$ : 279.0897, found 279.0898  $[\text{M}+\text{H}^+]$ .

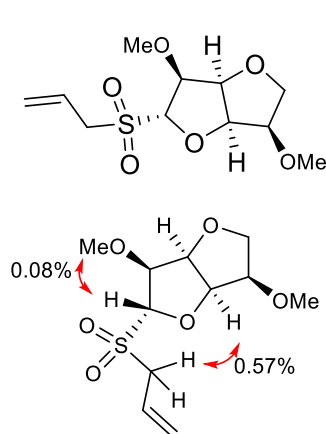

**31c:**  $[\alpha]_D^{21} = +100$  (*c* 0.03,  $\text{CDCl}_3$ ). –  $^1\text{H}$  NMR (500 MHz,  $\text{C}_6\text{D}_6$ ): 5.67–5.53 (1 H, m), 5.05–4.88 (3 H, m), 4.63 (1 H, t,  $J = 4.3$  Hz), 4.49–4.40 (1 H, m), 4.37–4.27 (1 H, m), 3.78 (2 H, dt,  $J = 17.5, 8.2$  Hz), 3.44 (1 H, dd,  $J = 14.0, 8.5$  Hz), 3.34–3.19 (5 H, m), 3.02 (3 H, s) ppm. –  $^{13}\text{C}$  NMR (125 MHz,  $\text{C}_6\text{D}_6$ ): 124.6, 124.4, 95.3, 83.4, 82.0, 81.3, 80.8, 69.8, 58.8, 57.7, 54.5 ppm. – IR: 2923, 1712, 1463, 1315, 1223, 1145, 1092, 995, 733, 631, 535  $\text{cm}^{-1}$ . – HRMS calcd for  $\text{C}_{11}\text{H}_{19}\text{O}_6\text{S}$ : 279.0897, found 279.0897  $[\text{M}+\text{H}^+]$ .

### Photoinduced C–H sulfination of methylpentan-2-one: sulfone 33-34

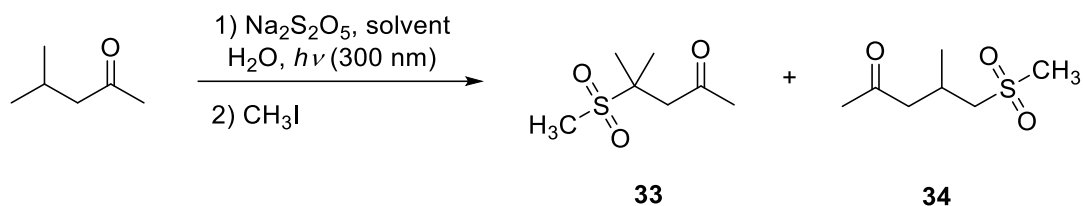

*In dichloromethane:* According to GP1, a stirred mixture of dichloromethane (4 mL) and Na<sub>2</sub>S<sub>2</sub>O<sub>5</sub> (114 mg, 0.6 mmol) was degassed with Ar for 5 min in a quartz test-tube. 4-Methylpentan-2-one (30 mg, 0.2 mmol) and water (0.5 mL, degassed prior to use) were then added. The solution was stirred vigorously and irradiated at 25 °C for 16 h in a Rayonet RPR-100 photochemical reactor. The reaction mixture was transferred into a pressure tube, iodomethane (0.1 mL, 2 mmol) was added, and the reaction mixture was stirred at 60 °C for 4 h according to GP3. The reaction mixture was then extracted with EtOAc (3 × 15 mL). The organic phases were combined, dried over anhydrous Na<sub>2</sub>SO<sub>4</sub> and concentrated under reduced pressure. The crude product was purified by flash chromatography on silica gel (EtOAc/hexane, 1 : 5 v/v) to give two separable regioisomers (28 mg, 79%, 1.4 : 1 ratio of sulfones **33** and **34**) as a colorless oil.

*In HFIP:* According to GP1, a stirred mixture of hexafluoroisopropanol (3 mL) and Na<sub>2</sub>S<sub>2</sub>O<sub>5</sub> (48 mg, 0.25 mmol) was degassed with Ar for 5 min in a quartz test-tube. 4-Methylpentan-2-one (30 mg, 0.2 mmol) and water (0.75 mL, degassed prior to use) were then added. The solution was stirred vigorously and irradiated at 25 °C for 16 h in a Rayonet RPR-100 photochemical reactor. The reaction mixture was transferred into a pressure tube, iodomethane (0.1 mL, 2 mmol) was added, and the reaction mixture was stirred at 60 °C for 4 h according to GP3. The reaction mixture was then extracted with EtOAc (3 × 15 mL). The organic phases were combined, dried over anhydrous Na<sub>2</sub>SO<sub>4</sub> and concentrated under reduced pressure. The crude product was purified by flash chromatography on silica gel (EtOAc/hexane, 1:3 v/v) to give two separable regioisomers (27 mg, 75%, 1 : 10 ratio of sulfones **33** and **34**) as a colorless oil.

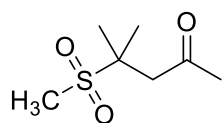

**33:**  $^1\text{H}$  NMR (500 MHz,  $\text{CDCl}_3$ ): 2.92 (2 H, s), 2.83 (3 H, s), 2.21 (3 H, s), 1.55 (6 H, s) ppm. –  $^{13}\text{C}$  NMR (125 MHz,  $\text{CDCl}_3$ ): 204.8, 61.4, 45.3, 34.5, 32.2, 20.5 ppm. – IR: 3004, 1708, 1420, 1359, 1220, 1092, 902, 625, 528  $\text{cm}^{-1}$ .

$^1$ . – HRMS calcd for  $\text{C}_7\text{H}_{15}\text{O}_3\text{S}$ : 179.0736, found 179.074 [M+H $^+$ ].

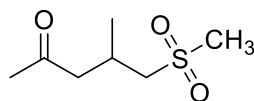

**34:**  $^1\text{H}$  NMR (500 MHz,  $\text{CDCl}_3$ ): 3.09 (1 H, dd,  $J = 14.1, 6.0$  Hz), 2.93 (3 H, s), 2.89 (1 H, dd,  $J = 14.2, 6.7$  Hz), 2.75 (1 H, dd,  $J = 17.7, 6.6$  Hz),

2.63 (1 H, dq,  $J = 12.8, 6.4$  Hz), 2.53 (1 H, dd,  $J = 17.7, 5.7$  Hz), 2.13 (3 H, s), 1.16 (3 H, d,  $J = 6.8$  Hz) ppm. –  $^{13}\text{C}$  NMR (125 MHz,  $\text{CDCl}_3$ ): 207.2, 59.6, 49.0, 41.5, 30.5, 24.8, 20.5 ppm. – IR: 3999, 2928, 1706, 1415, 1366, 1291, 1223, 1190, 1128, 967, 851, 637, 603, 525  $\text{cm}^{-1}$ . – HRMS calcd for  $\text{C}_7\text{H}_{15}\text{O}_3\text{S}$ : 179.0736, found 179.0738 [M+H $^+$ ].

### Photoinduced C–H sulfination of heptan-4-one: sulfones **S1**-**S2**

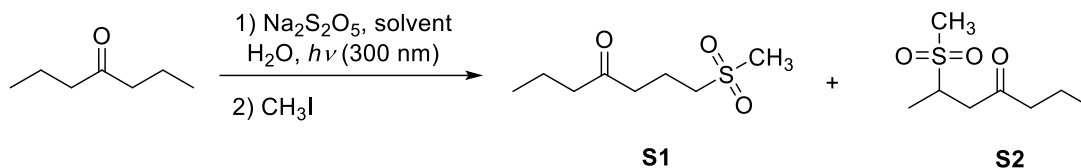

**In dichloromethane:** According to GP1, a stirred mixture of dichloromethane (3 mL) and  $\text{Na}_2\text{S}_2\text{O}_5$  (114 mg, 0.6 mmol) was degassed with Ar for 5 min in a quartz test-tube. Heptan-4-one (23 mg, 0.2 mmol) and water (0.5 mL, degassed prior to use) were then added. The solution was stirred vigorously and irradiated at 25 °C for 16 h in a Rayonet RPR-100 photochemical reactor. The reaction mixture was transferred into a pressure tube, iodomethane (0.1 mL, 2 mmol) was added, and the reaction mixture was stirred at 60 °C for 4 h according to GPXX. The reaction mixture was then extracted with EtOAc (3  $\times$  15 mL). The organic phases were combined, dried over anhydrous  $\text{Na}_2\text{SO}_4$  and concentrated under reduced pressure. The crude product was purified by flash chromatography on silica gel (EtOAc/hexane, 1 : 5 v/v) to give two separable isomers (24 mg, 62%, 1 : 2.6 ratio of sulfone **S1** and **S2**) as a colorless oil.

**In HFIP:** According to GP1, a stirred mixture of hexafluoro-2-propanol (3 mL) and  $\text{Na}_2\text{S}_2\text{O}_5$  (114 mg, 0.6 mmol) was degassed with Ar for 5 min in a quartz test-tube. Heptan-4-one (23 mg, 0.2 mmol) and water (0.75 mL, degassed prior to use) were then added. The solution was stirred vigorously and irradiated at 25 °C for 16 h in a Rayonet RPR-100 photochemical reactor. The reaction mixture was transferred into a pressure tube, iodomethane (0.1 mL, 2 mmol) was





on silica gel (EtOAc/hexane, 1 : 5 v/v) to give three separable isomers (37 mg, 75%, 3 : 1 : 1 ratio of isomers **S3**, **S4**, **S5**) as a colorless oil.

**In HFIP:** According to GP1, a stirred mixture of hexafluoro-2-propanol (3 mL) and Na<sub>2</sub>S<sub>2</sub>O<sub>5</sub> (57 mg, 0.3 mmol) was degassed with Ar for 5 min in a quartz test-tube. Ethyl cyclopentanecarboxylate (26 mg, 0.2 mmol) and water (0.75 mL, degassed prior to use) were then added. The solution was stirred vigorously and irradiated at 25 °C for 16 h in a Rayonet RPR-100 photochemical reactor. The reaction mixture was transferred into a pressure tube, allyl bromide (0.2 mL, 2 mmol) was added, and the reaction mixture was stirred at 60 °C for 4 h. The reaction mixture was then extracted with EtOAc (3 × 15 mL). The organic phases were combined, dried over anhydrous Na<sub>2</sub>SO<sub>4</sub> and concentrated under reduced pressure. The crude product was purified by flash chromatography on silica gel (EtOAc/hexane, 1 : 5 v/v) to give three separable isomers (37 mg, 75%, 1.1 : 1.4 : 1 ratio of isomers **S3**, **S4**, **S5**) as a colorless oil.

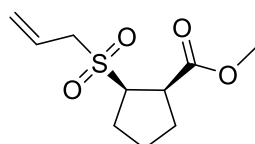

<sup>1</sup>H NMR (500 MHz, CDCl<sub>3</sub>): 5.95–5.77 (1H, m), 5.47–5.31 (2H, m), 3.89 (1H, dt, *J* = 9.2, 6.4 Hz), 3.74–3.64 (5H, m), 3.30 (1H, dt, *J* = 8.6, 6.5 Hz), 2.20–2.01 (3H, m), 1.90–1.66 (3H, m) ppm. – <sup>13</sup>C NMR (125 MHz, CDCl<sub>3</sub>): 174.2, 124.7, 124.6, 62.1, 57.0, 52.5, 44.7, 31.8, 27.4, 25.9 ppm. – IR: 2954, 2875, 1731, 1639,

1437, 1370, 1305, 1227, 1198, 1177, 1130, 1083, 1032, 995, 938, 879, 768, 631, 535 cm<sup>-1</sup>. – HRMS calcd for C<sub>10</sub>H<sub>17</sub>O<sub>4</sub>S: 233.0842, found 233.0847 [M+H<sup>+</sup>].

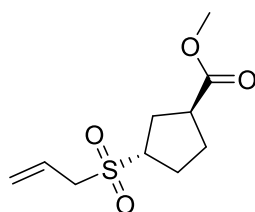

<sup>1</sup>H NMR (500 MHz, CDCl<sub>3</sub>): 5.99–5.80 (1H, m), 5.52–5.36 (2H, m), 3.73–3.56 (6H, m), 3.05–2.98 (1H, m), 2.35–2.18 (2H, m), 2.19–2.05 (3H, m), 1.92–1.82 (1H, m) ppm. – <sup>13</sup>C NMR (125 MHz, CDCl<sub>3</sub>): 175.2, 125.0, 124.6, 58.8, 56.8, 52.1, 43.4, 29.9, 29.8, 26.1 ppm. – IR: 3003, 1708, 1422, 1359, 1311, 1221, 1131, 1092, 901, 630, 529 cm<sup>-1</sup>. – HRMS calcd for C<sub>10</sub>H<sub>17</sub>O<sub>4</sub>S: 233.0842, found

233.0849 [M+H<sup>+</sup>].

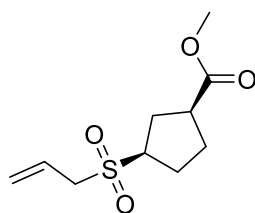

<sup>1</sup>H NMR (500 MHz, CDCl<sub>3</sub>): 5.96–5.82 (1H, m), 5.48–5.37 (2H, m), 3.70–3.61 (5H, m), 3.52–3.41 (1H, m), 2.88–2.73 (1H, m), 2.30 (2H, t, *J* = 8.9 Hz), 2.24–2.15 (1H, m), 2.04–1.91 (3H, m) ppm. – <sup>13</sup>C NMR (125 MHz, CDCl<sub>3</sub>): 174.0, 125.0, 124.4, 59.0, 56.6, 52.0, 43.9, 30.0, 28.9, 25.7 ppm. – IR: 2954, 1731, 1713,

1640, 1437, 1398, 1363, 1291, 1243, 1221, 1172, 1129, 1087, 1029, 995, 913, 756, 734, 631, 593, 532 cm<sup>-1</sup>. – HRMS HMRS calcd for C<sub>10</sub>H<sub>17</sub>O<sub>4</sub>S: 233.0842, found 233.0847 [M+H<sup>+</sup>].

## Sulfonyl derivatives

### Photoinduced C–H sulfination of cycloheptane: cycloheptanesulfinic acid (37)

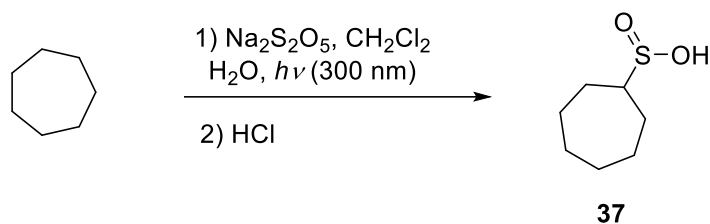

According to GP1, a stirred mixture of dichloromethane (3 mL) and  $\text{Na}_2\text{S}_2\text{O}_5$  (190 mg, 1 mmol) was degassed with Ar for 5 min in a quartz test-tube. Cycloheptane (49 mg, 0.5 mmol) and water (0.75 mL, degassed prior to use) were then added. The solution was stirred vigorously and irradiated at 25 °C for 16 h in a Rayonet RPR-100 photochemical reactor., 12M aqueous HCl (0.1 mL) was added, and the reaction mixture was stirred at room temperature for 10 min. The reaction mixture was concentrated under nitrogen to dryness. EtOAc (15 mL) was added to the flask and the flask was sonicated, filtered through celite, the organic phases were concentrated under nitrogen to give sulfinic acid **37** (64 mg, 80%) as a colorless oil.

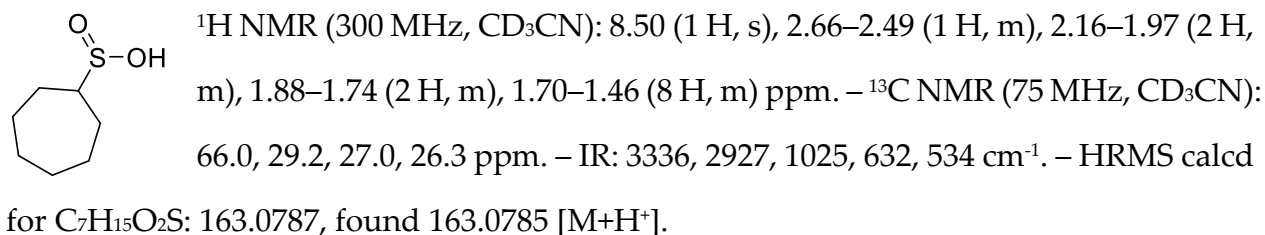

### Photoinduced C–H sulfination of cycloheptane: sodium cycloheptanesulfinate (38)

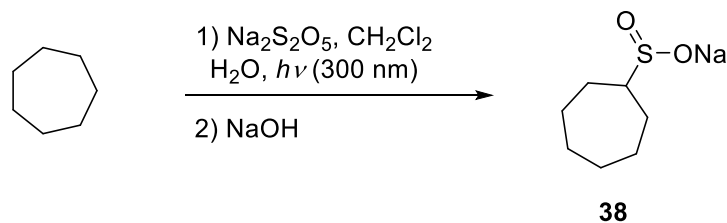

According to GP1, a stirred mixture of dichloromethane (3 mL) and  $\text{Na}_2\text{S}_2\text{O}_5$  (190 mg, 1 mmol) was degassed with Ar for 5 min in a quartz test-tube. Cycloheptane (49 mg, 0.5

mmol) and water (0.75 mL, degassed prior to use) were then added. The solution was stirred vigorously and irradiated at 25 °C for 16 h in a Rayonet RPR-100 photochemical reactor., 1M NaOH in methanol solution (1 mL) was added, and the reaction mixture was stirred at room temperature for 10 min. The reaction mixture was concentrated under nitrogen to dryness. The crude product was purified by flash chromatography on silica gel (MeOH/DCM, 1:10 v/v) to give sulfinate **38** (69 mg, 75%) as a white solid.

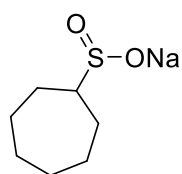

m.p. >250 °C. – <sup>1</sup>H NMR (300 MHz, CD<sub>3</sub>OD): 2.06–1.88 (3 H, m), 1.83–1.68 (2 H, m), 1.66–1.25 (8 H, m) ppm. – <sup>13</sup>C NMR (75 MHz, CD<sub>3</sub>OD): 68.2, 29.4, 27.5, 26.9 ppm. – IR: 3327, 2926, 1646, 1458, 953, 814, 632, 534 cm<sup>-1</sup>. – HRMS calcd for C<sub>7</sub>H<sub>15</sub>O<sub>2</sub>S: 163.0787, found 163.0787 [M+H<sup>+</sup>].

#### Photoinduced C–H sulfination of cyclohexane: 4-(cyclohexylsulfonyl)morpholine (**39**)

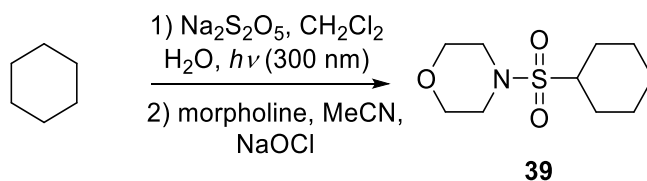

According to GP1, a stirred mixture of dichloromethane (3 mL) and Na<sub>2</sub>S<sub>2</sub>O<sub>5</sub> (190 mg, 1 mmol) was degassed with Ar for 5 min in a quartz test-tube. Cyclohexane (42 mg, 0.5 mmol) and water (0.75 mL, degassed prior to use) were then added. The solution was stirred vigorously and irradiated at 25 °C for 16 h in a Rayonet RPR-100 photochemical reactor. The reaction mixture was concentrated under nitrogen to remove the dichloromethane, 3 mL MeCN was added. Morpholine (131 mg, 1.5 mmol) and a 1.41 M NaOCl solution (1.06 mL) were added dropwise at 0 °C, and the reaction mixture was stirred at room temperature for 8 h. The reaction mixture was then extracted with EtOAc (3 × 15 mL). The organic phases were combined, dried over anhydrous Na<sub>2</sub>SO<sub>4</sub> and concentrated under reduced pressure. The crude product was purified by flash

chromatography on silica gel (EtOAc/hexane, 1 : 5 v/v) to give sulfonamide **39** (88 mg, 76%) as a white solid.

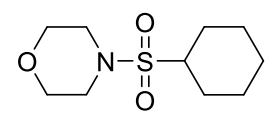 m.p. 66–68 °C. – <sup>1</sup>H NMR (500 MHz, CDCl<sub>3</sub>): 3.87–3.48 (4 H, m), 3.33–3.15 (4 H, m), 2.96–2.67 (1 H, m), 2.06 (2 H, d, *J* = 12.0 Hz), 1.83 (2 H, d, *J* = 13.2 Hz), 1.65 (1 H, d, *J* = 12.2 Hz), 1.45 (2 H, qd, *J* = 12.4, 2.6 Hz), 1.30–1.06 (3 H, m) ppm. – <sup>13</sup>C NMR (125 MHz, CDCl<sub>3</sub>): 67.02, 61.23, 46.35, 26.54, 25.16, 25.12. ppm. – IR: 3003, 1709, 1421, 1358, 1261, 1220, 1147, 1116, 1092, 953, 901, 676, 627, 577, 528 cm<sup>-1</sup>. – HRMS calcd for C<sub>10</sub>H<sub>20</sub>NO<sub>3</sub>S: 234.1158, found 234.1161 [M+H<sup>+</sup>].

**Photoinduced C–H sulfination of cyclopentane: 2-(cyclopentylsulfonyl)-1,2,3,4-tetrahydroisoquinoline (40)**

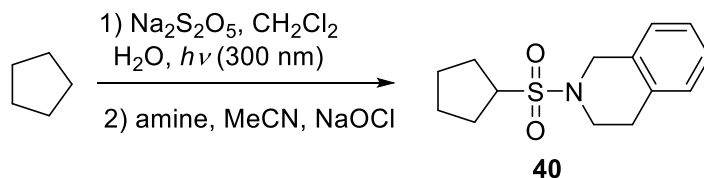

According to GP1, a stirred mixture of dichloromethane (3 mL) and Na<sub>2</sub>S<sub>2</sub>O<sub>5</sub> (190 mg, 1 mmol) was degassed with Ar for 5 min in a quartz test-tube. Cyclopentane (35 mg, 0.5 mmol) and water (0.75 mL, degassed prior to use) were then added. The solution was stirred vigorously and irradiated at 25 °C for 16 h in a Rayonet RPR-100 photochemical reactor. The reaction mixture was concentrated under nitrogen to remove the dichloromethane, 3 mL MeCN was added. 1,2,3,4-Tetrahydroisoquinoline (133 mg, 1 mmol) and a 1.41 M NaOCl solution (1.06 mL) were added dropwise at 0 °C, and the reaction mixture was stirred at room temperature for 8 h. The reaction mixture was then extracted with EtOAc (3 × 15 mL). The organic phases were combined, dried over anhydrous Na<sub>2</sub>SO<sub>4</sub> and concentrated under reduced pressure. The crude product was purified by flash chromatography on silica gel (EtOAc/hexane, 1 : 5 v/v) to give sulfonamide **40** (90 mg, 68%) as a white solid.

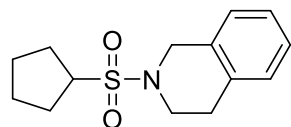

m.p. 55–57 °C. – <sup>1</sup>H NMR (500 MHz, CDCl<sub>3</sub>): 7.20–7.09 (3 H, m), 7.09–7.01 (1 H, m), 4.51 (s, 2H), 3.61 (2 H, t, *J* = 5.9 Hz), 3.52 (1 H, p, *J* = 8.1 Hz), 2.93 (2 H, t, *J* = 5.8 Hz), 2.12–1.88 (4 H, m), 1.84–1.72 (2 H, m), 1.66–1.52 (2 H, m) ppm. – <sup>13</sup>C NMR (125 MHz, CDCl<sub>3</sub>): 133.5, 132.4, 129.1, 126.8, 126.4, 126.2, 60.9, 47.5, 43.7, 29.4, 28.1, 25.7. ppm. – IR: 2954, 2868, 1497, 1452, 1318, 1141, 1022, 1101, 954, 759 cm<sup>-1</sup>. – HRMS calcd for C<sub>14</sub>H<sub>19</sub>NO<sub>2</sub>S: 266.1209, found 266.1207 [M+H<sup>+</sup>].

**Photoinduced C–H sulfination of cyclopentane: (*R*)-*N*-(1-(4-methoxyphenyl)ethyl)cyclopentanesulfonamide (**41**)**

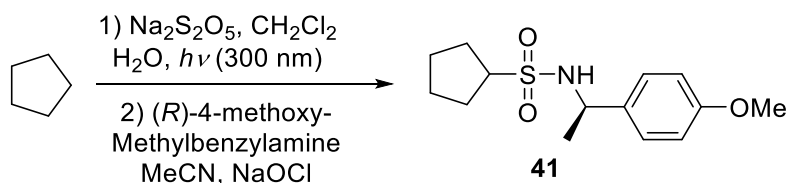

According to GP1, a stirred mixture of dichloromethane (3 mL) and Na<sub>2</sub>S<sub>2</sub>O<sub>5</sub> (190 mg, 1 mmol) was degassed with Ar for 5 min in a quartz test-tube. Cyclopentane (35 mg, 0.5 mmol) and H<sub>2</sub>O (0.75 mL, degassed prior to use) were then added. The solution was stirred vigorously and irradiated at 25 °C for 16 h in a Rayonet RPR-100 photochemical reactor. The reaction mixture was concentrated under nitrogen to remove the dichloromethane, 3 mL MeCN was added. (*R*)-(+)-4-methoxy- $\alpha$ -methylbenzylamine (151 mg, 1 mmol) and 1.41 M NaOCl solution (1.06 mL) were added dropwise at 0 °C, and the reaction mixture was stirred at room temperature for 8 h. The reaction mixture was then extracted with EtOAc (3 × 15 mL). The organic phases were combined, dried over anhydrous Na<sub>2</sub>SO<sub>4</sub> and concentrated under reduced pressure. The crude product was purified by flash chromatography on silica gel (EtOAc/hexane, 1:5 v/v) to give sulfonamide **41** (93.5 mg, 66%) as a white solid.

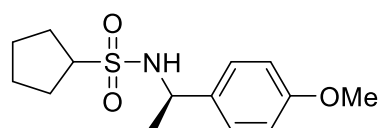

m.p. 112–114 °C. – <sup>1</sup>H NMR (500 MHz, CDCl<sub>3</sub>): 7.25 (2H, d, *J* = 8.6 Hz), 6.88 (2H, d, *J* = 8.6 Hz), 4.75–4.39 (2H, m), 3.81 (3H,

s), 3.14–2.92 (1H, m), 2.05–1.92 (1H, m), 1.87 (2H, dt,  $J = 13.3, 6.8$  Hz), 1.76–1.62 (3H, m), 1.58–1.41 (5H, m) ppm. –  $^{13}\text{C}$  NMR (125 MHz,  $\text{CDCl}_3$ ): 159.2, 135.3, 127.5, 114.2, 62.4, 55.4, 53.3, 28.4, 27.8, 26.2, 25.9, 24.6. ppm. – IR: 3274, 2957, 2870, 1612, 1514, 1449, 1305, 1246, 1145, 601  $\text{cm}^{-1}$ . – HRMS calcd for  $\text{C}_{14}\text{H}_{21}\text{NaNO}_3\text{S}$ : 306.1134, found 306.1136  $[\text{M}+\text{Na}^+]$ .

**Photoinduced C–H sulfination of 2,6-dimethyl-4-heptanone: 2,6-dimethyl-1-(morpholinosulfonyl)heptan-4-one (42)**

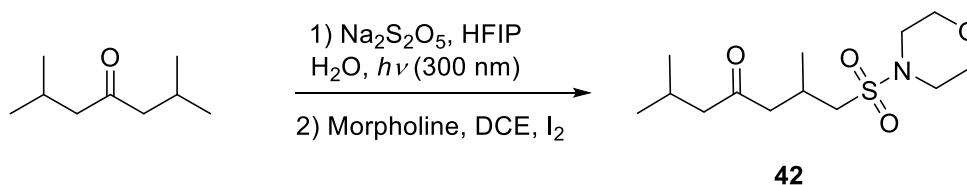

According to GP1, a stirred mixture of hexafluoroisopropanol (3 mL) and  $\text{Na}_2\text{S}_2\text{O}_5$  (114 mg, 0.6 mmol) was degassed with Ar for 5 min in a quartz test-tube. 2,6-Dimethyl-4-heptanone (28 mg, 0.2 mmol) and water (0.75 mL, degassed prior to use) were then added. The solution was stirred vigorously and irradiated at 25 °C for 16 h in a Rayonet RPR-100 photochemical reactor. The reaction mixture was concentrated under nitrogen to dryness, 5 mL 1,2-dichloroethane was added. Morpholine (9 mg, 0.1 mmol) and iodine (42 mg, 0.4 mmol) were added, and the reaction mixture was stirred under air at room temperature for 16 h. The reaction mixture was then washed with saturated sodium thiosulfate (10 mL) and extracted with EtOAc ( $3 \times 15$  mL). The organic phases were combined, dried over anhydrous  $\text{Na}_2\text{SO}_4$  and concentrated under reduced pressure. The crude product was purified by flash chromatography on silica gel (EtOAc/hexane, 1 : 5 v/v) to give sulfonamide **42** (16 mg, 56%) as a colorless oil.

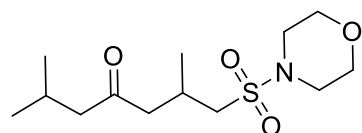

$^1\text{H}$  NMR (500 MHz,  $\text{CDCl}_3$ ): 3.77–3.70 (4 H, m), 3.23 (4 H, dd,  $J = 5.7, 3.6$  Hz), 3.02 (1 H, dd,  $J = 13.8, 6.0$  Hz), 2.79 (1 H, dd,  $J = 13.8, 6.5$  Hz), 2.67 (1 H, dd,  $J = 17.3, 6.2$  Hz), 2.59 (1 H, dd,  $J = 12.8, 6.4$  Hz), 2.48 (1 H, dd,  $J = 17.3, 6.0$  Hz), 2.25 (2 H, d,  $J = 7.0$  Hz), 2.11 (1 H, dt,  $J = 13.5,$

6.7 Hz), 1.14 (3 H, d,  $J = 6.8$  Hz), 0.89 (6 H, d,  $J = 6.6$  Hz) ppm. –  $^{13}\text{C}$  NMR (125 MHz,  $\text{CDCl}_3$ ): 209.4, 66.6, 53.1, 52.3, 48.4, 45.8, 25.3, 24.7, 22.6, 20.3 ppm. – IR: 3023, 2982, 1731, 1373, 1241, 1045, 912, 847, 750, 670, 636, 608  $\text{cm}^{-1}$ . – HRMS calcd for  $\text{C}_{13}\text{H}_{26}\text{NO}_4\text{S}$ : 292.1577, found 292.158  $[\text{M}+\text{H}^+]$ .

**Photoinduced C–H sulfination of 2,6-dimethyl-4-heptanone: 1-((3,4-Dihydroisoquinolin-2(1H)-yl)sulfonyl)-2,6-dimethylheptan-4-one (43)**

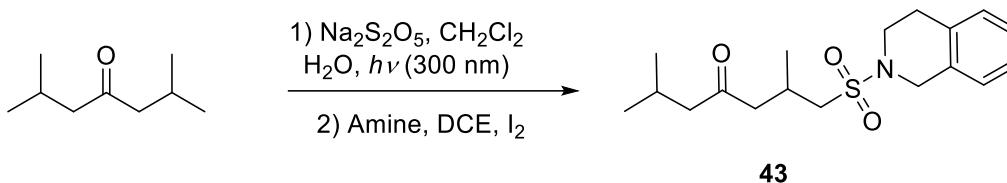

According to GP1, a stirred mixture of hexafluoroisopropanol (3 mL) and  $\text{Na}_2\text{S}_2\text{O}_5$  (114 mg, 0.6 mmol) was degassed with Ar for 5 min in a quartz test-tube. 2,6-Dimethyl-4-heptanone (28 mg, 0.2 mmol) and water (0.75 mL, degassed prior to use) were then added. The solution was stirred vigorously and irradiated at 25 °C for 16 h in a Rayonet RPR-100 photochemical reactor. The reaction mixture was concentrated under nitrogen to dryness, 5 mL 1,2-dichloroethane was added. 1,2,3,4-Tetrahydroisoquinoline (13.3 mg, 0.1 mmol) and iodine (42 mg, 0.4 mmol) were added, and the reaction mixture was stirred under air at room temperature for 16 h. The reaction mixture was then washed with saturated sodium thiosulfate (10 mL) and extracted with EtOAc ( $3 \times 15$  mL). The organic phases were combined, dried over anhydrous  $\text{Na}_2\text{SO}_4$  and concentrated under reduced pressure. The crude product was purified by flash chromatography on silica gel (EtOAc/hexane, 1 : 5 v/v) to give sulfonamide **43** (18 mg, 54%) as a colorless oil.

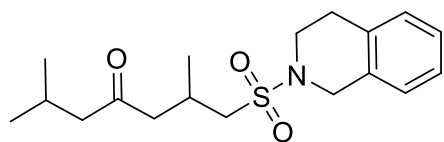

$^1\text{H}$  NMR (300 MHz,  $\text{CDCl}_3$ ): 7.21–7.12 (3 H, m), 7.11–7.04 (1 H, m), 3.64–3.48 (1 H, m), 3.09 (2 H, dd,  $J = 13.9, 6.2$  Hz), 2.95 (2 H, dd,  $J = 14.3, 8.6$  Hz), 2.88 (1 H, dd,  $J = 13.9, 6.3$  Hz), 2.72 (2 H, dd,  $J = 17.3, 6.0$  Hz), 2.62 (1 H, tt,  $J = 12.9, 6.4$  Hz), 2.49 (1 H, dd,  $J = 17.3,$

6.4 Hz), 2.26 (2 H, d,  $J = 7.0$  Hz), 2.18 – 2.07 (1 H, m), 1.16 (3 H, d,  $J = 11.5$  Hz), 0.90 (6 H, d,  $J = 6.6$  Hz) ppm. –  $^{13}\text{C}$  NMR (75 MHz,  $\text{CDCl}_3$ ): 209.6, 133.5, 132.1, 129.2, 127.0, 126.6, 126.4, 54.6, 52.4, 48.5, 47.2, 43.5, 29.2, 25.5, 24.7, 22.7, 20.3 ppm. – IR: 3390, 2953, 2871, 1453, 1376, 1307, 1240, 1101, 1017, 969, 922  $\text{cm}^{-1}$ . – HRMS calcd for  $\text{C}_{18}\text{H}_{28}\text{NO}_3\text{S}$ : 338.1784, found 338.1785  $[\text{M}+\text{H}^+]$ .

**Photoinduced C–H sulfination of 2,6-dimethyl-4-heptanone: 2,6-dimethyl-4-oxoheptane-1-sulfonyl fluoride (44)**

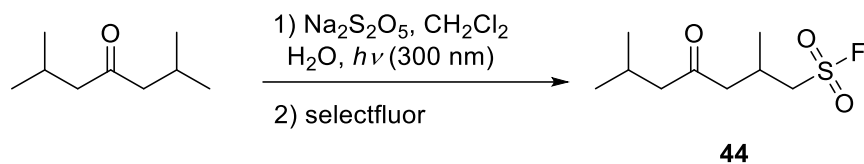

According to GP1, a stirred mixture of hexafluoroisopropanol (3 mL) and  $\text{Na}_2\text{S}_2\text{O}_5$  (114 mg, 0.6 mmol) was degassed with Ar for 5 min in a quartz test-tube. 2,6-Dimethyl-4-heptanone (28 mg, 0.2 mmol) and water (0.75 mL, degassed prior to use) were then added. The solution was stirred vigorously and irradiated at 25 °C for 16 h in a Rayonet RPR-100 photochemical reactor. The reaction mixture was concentrated under nitrogen to remove the hexafluoroisopropanol, 3 mL 1,4-dioxane was added. The reaction mixture was transferred into a 20 mL vial, selectfluor (212 mg, 0.6 mmol) was added, and the reaction mixture was stirred at room temperature for 4 h. The reaction mixture was then extracted with EtOAc (3 × 15 mL). The organic phases were combined, dried over anhydrous  $\text{Na}_2\text{SO}_4$  and concentrated under reduced pressure. The crude product was purified by flash chromatography on silica gel (EtOAc/hexane, 1 : 5 v/v) to give sulfonyl fluoride **44** (28 mg, 63%) as a colorless oil.

$^1\text{H}$  NMR (500 MHz,  $\text{CDCl}_3$ ): 3.58 (1 H, ddd,  $J = 14.7, 5.1, 4.3$  Hz), 3.38 (1 H, ddd,  $J = 14.6, 6.5, 3.0$  Hz), 2.78–2.48 (3 H, m), 2.27 (2 H, d,  $J = 7.0$  Hz), 2.12 (1 H, dt,  $J = 13.5, 6.7$  Hz), 1.19 (3 H, d,  $J = 6.6$  Hz), 0.90 (6 H, d,  $J = 6.7$  Hz) ppm. –  $^{13}\text{C}$  NMR (125 MHz,  $\text{CDCl}_3$ ): 208.6, 55.8, 55.7, 52.3, 47.4, 25.6, 24.7, 22.6, 19.4 ppm. –  $^{19}\text{F}$  NMR (471 MHz,  $\text{CDCl}_3$ ): 59.8 ppm. – IR: 2961, 1710, 1465, 1402, 1215, 908, 803, 754,



732, 670, 850, 631, 580, 534  $\text{cm}^{-1}$ . – HRMS calcd for  $\text{C}_9\text{H}_{18}\text{FO}_3\text{S}$ : 225.0955, found 225.0957 [M+H<sup>+</sup>].

**Photoinduced C–H sulfination of 3-pentanone: 3-oxopentane-1-sulfonyl fluoride (45)**

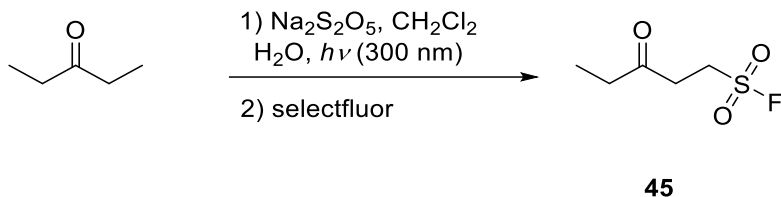

According to GP1, a stirred mixture of dichloromethane (3 mL) and  $\text{Na}_2\text{S}_2\text{O}_5$  (190 mg, 1 mmol) was degassed with Ar for 5 min in a quartz test-tube. 3-Pentanone (26 mg, 0.3 mmol) and water (0.75 mL, degassed prior to use) were then added. The solution was stirred vigorously and irradiated at 25 °C for 16 h in a Rayonet RPR-100 photochemical reactor. The reaction mixture was transferred into a 20mL vial, Selectfluor (318 mg, 0.9 mmol) was added, and the reaction mixture was stirred at room temperature for 4 h. The reaction mixture was then extracted with EtOAc (3 × 15 mL). The organic phases were combined, dried over anhydrous  $\text{Na}_2\text{SO}_4$  and concentrated under reduced pressure. The crude product was purified by flash chromatography on silica gel (EtOAc/hexane, 1 : 5 v/v) to give sulfonyl fluoride **45** (29 mg, 57%) as a colorless oil.

$^1\text{H}$  NMR (500 MHz,  $\text{CDCl}_3$ ): 3.70 (2 H, td,  $J = 7.3, 5.1$  Hz), 3.05 (2 H, t,  $J = 7.4$  Hz), 2.53 (2 H, q,  $J = 7.3$  Hz), 1.12 (3 H, t,  $J = 7.3$  Hz) ppm. –  $^{13}\text{C}$  NMR (125 MHz,  $\text{CDCl}_3$ ): 205.2, 45.4, 45.3, 36.1, 35.5, 7.8. ppm. – IR: 2984, 2255, 1732, 1446, 1373, 1238, 1096, 1045, 916, 847, 732, 648, 631, 608, 530  $\text{cm}^{-1}$ . – HRMS calcd for  $\text{C}_5\text{H}_9\text{FNaO}_3\text{S}$ : 191.0149, found 191.0151 [M+H<sup>+</sup>].

**Photoinduced C–H sulfonation of cyclohexane: 7-chloro-4-(cyclohexylsulfonyl)quinoline (46)**

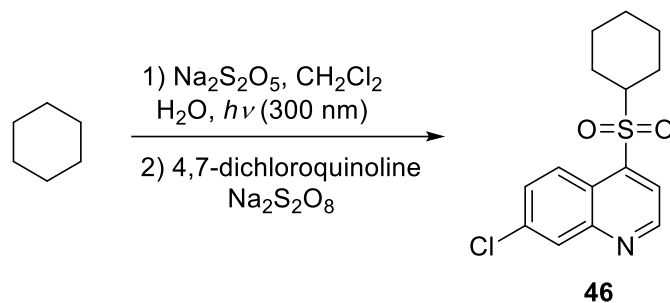

According to GP1, a stirred mixture of dichloromethane (3 mL) and  $\text{Na}_2\text{S}_2\text{O}_5$  (190 mg, 1 mmol) was degassed with Ar for 5 min in a quartz test-tube. Cyclohexane (42 mg, 0.5 mmol) and water (0.75 mL, degassed prior to use) were then added. The solution was stirred vigorously and irradiated at 25 °C for 16 h in a Rayonet RPR-100 photochemical reactor. The reaction mixture was transferred into a 20 mL vial, 4,7-dichloroquinoline (50 mg, 0.25 mmol) and  $\text{Na}_2\text{S}_2\text{O}_8$  (238 mg, 1 mmol) were added, and the reaction mixture was stirred at room temperature for 2 h. The reaction mixture was then extracted with EtOAc (3 × 15 mL). The organic phases were combined, dried over anhydrous  $\text{Na}_2\text{SO}_4$  and concentrated under reduced pressure. The crude product was purified by flash chromatography on silica gel (EtOAc/hexane, 1 : 5 v/v) to give sulfone **46** (49 mg, 64%) as a white solid.

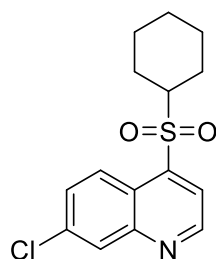

m.p. 169–171 °C. –  $^1\text{H}$  NMR (300 MHz,  $\text{CDCl}_3$ ): 9.12 (1 H, d,  $J = 4.1$  Hz), 8.69 (1 H, d,  $J = 9.2$  Hz), 8.24 (1 H, d,  $J = 2.1$  Hz), 7.99 (1 H, d,  $J = 4.4$  Hz), 7.68 (1 H, dd,  $J = 9.2, 2.2$  Hz), 3.23–2.91 (1 H, m), 2.08–1.78 (4 H, m), 1.78–1.40 (3 H, m), 1.34–1.01 (3 H, m) ppm. –  $^{13}\text{C}$  NMR (75 MHz,  $\text{CDCl}_3$ ): 150.7, 149.9, 141.8, 136.7, 130.0, 129.6, 125.9, 123.5, 63.9, 25.1, 25.0 ppm. – IR: 3344, 2940, 1723, 1606, 1490, 1453, 1373, 1315, 1244, 1204, 1184, 1156, 1133, 1067, 974, 927, 849, 829, 756, 688, 633, 618, 575, 563, 537  $\text{cm}^{-1}$ . – HRMS  $\text{C}_{15}\text{H}_{17}\text{ClNO}_2\text{S}$ : 310.0663, found 310.0659 [ $\text{M}+\text{H}^+$ ].

### Photoinduced C–H sulfination of cyclopentane: sodium $^{18}\text{O}_2$ -cyclopentanesulfinate

(47)

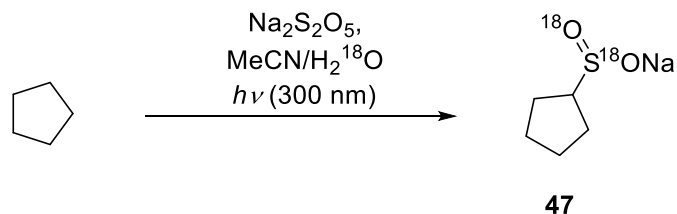

According to GP1, a stirred mixture of acetonitrile (2.5 mL) and  $\text{Na}_2\text{S}_2\text{O}_5$  (68 mg, 0.36 mmol) was degassed with Ar for 5 min in a quartz test-tube. Cyclopentane (21 mg, 0.3 mmol) and  $\text{H}_2^{18}\text{O}$  (0.5 mL) were then added. The solution was stirred vigorously and irradiated at 25 °C for 36 h in a Rayonet RPR-100 photochemical reactor. The reaction mixture was concentrated under nitrogen to dryness. The crude product was purified by flash chromatography on silica gel (MeOH/DCM, 1 : 10 v/v) to give sulfinate **45** (30 mg, 64%, 95%  $^{18}\text{O}$  isotopic purity determined by HRMS) as a white solid.

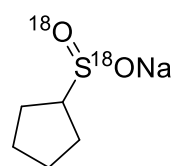 m.p. >250 °C. –  $^1\text{H}$  NMR (500 MHz,  $\text{CD}_3\text{OD}$ ): 3.25 (1 H, p,  $J = 8.0$  Hz), 1.96 (4 H, tdd,  $J = 7.6, 5.0, 1.8$  Hz), 1.80–1.70 (2 H, m), 1.59 (2 H, dddd,  $J = 12.1, 9.8, 6.6, 4.0$  Hz) ppm. –  $^{13}\text{C}$  NMR (125 MHz,  $\text{CD}_3\text{OD}$ ): 61.1, 29.9, 27.0 ppm. – IR: 3328, 2935, 1662, 1425, 994, 985,  $\text{cm}^{-1}$ . – HRMS calcd for  $\text{C}_5\text{H}_9^{18}\text{O}_2\text{S}$ : 137.0403, found 137.0407 [M].

**Photoinduced C–H sulfination of cyclopentane: 7-chloro-4-<sup>18</sup>O<sub>2</sub>-  
(cyclopentylsulfonyl)quinoline (48)**

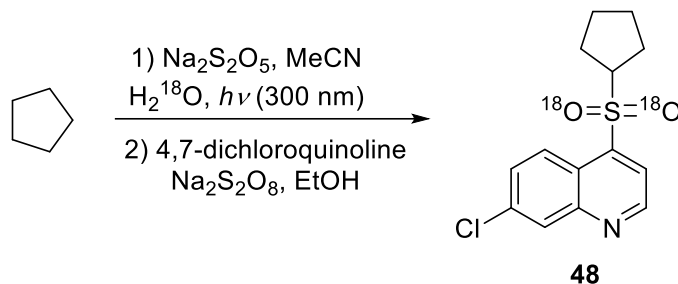

According to GP1, a stirred mixture of MeCN (1.7 mL) and Na<sub>2</sub>S<sub>2</sub>O<sub>5</sub> (46 mg, 0.24 mmol) was degassed with Ar for 5 min in a quartz test-tube. Cyclopentane (14 mg, 0.2 mmol) and H<sub>2</sub><sup>18</sup>O (0.3 mL) were then added. The solution was stirred vigorously and irradiated at 25 °C for 16 h in a Rayonet RPR-100 photochemical reactor. The reaction mixture was transferred into a 20 mL vial, 4,7-dichloroquinoline (20 mg, 0.1 mmol), Na<sub>2</sub>S<sub>2</sub>O<sub>8</sub> (71 mg, 0.3 mmol) and ethanol (2 mL) were added, and the reaction mixture was stirred at room temperature for 2 h. The reaction mixture was then extracted with EtOAc (3 × 15 mL). The organic phases were combined, dried over anhydrous Na<sub>2</sub>SO<sub>4</sub> and concentrated under reduced pressure. The crude product was purified by flash chromatography on silica gel (EtOAc/hexane, 1 : 5 v/v) to give sulfone **48** (23 mg, 75%, 95% <sup>18</sup>O isotopic purity determined by HRMS) as a white solid.

m.p. 163–165 °C. – <sup>1</sup>H NMR (500 MHz, CDCl<sub>3</sub>): 9.13 (1 H, d, *J* = 4.4 Hz), 8.70 (1 H, d, *J* = 9.1 Hz), 8.26 (1 H, d, *J* = 2.1 Hz), 8.03 (1 H, d, *J* = 4.3 Hz), 7.69 (1 H, dd, *J* = 9.2, 2.2 Hz), 3.68 (1 H, tt, *J* = 8.1, 6.8 Hz), 2.16–2.05 (2 H, m), 1.82 (4 H, tdd, *J* = 8.9, 7.0, 4.1 Hz), 1.67–1.57 (2 H, m) ppm. – <sup>13</sup>C NMR (125 MHz, CDCl<sub>3</sub>): 151.0, 150.1, 143.1, 136.8, 130.1, 129.8, 125.8, 122.8, 121.5, 64.4, 27.3, 26.1 ppm. – IR: 3335, 2928, 1802, 1615, 1482, 1463, 1362, 1325, 1223, 1205, 1195, 1165, 1162, 1035, 982 cm<sup>-1</sup>. – HRMS C<sub>14</sub>H<sub>14</sub>ClN<sup>18</sup>O<sub>2</sub>S: 300.0591, found 300.0591 [M+H<sup>+</sup>].

## Computational data

### 1. Software

Quantum chemical calculations were performed using the Stampede2 supercomputer at the Texas Advanced Computing Center (TACC) hosted by the University of Texas in Austin, Texas.<sup>10</sup> DFT geometry optimization, vibrational frequency, and IRC calculations were conducted using Gaussian 16 (rA.03).<sup>11</sup> The CREST utility<sup>12</sup> of the xTB software suite<sup>13,14</sup> was used in conjunction with manual conformational searching to locate initial starting geometries for optimization via DFT. Final images of minima and transition state geometries were rendered using CYLview.<sup>15</sup> ORCA<sup>16,17</sup> version 4.2.1 was used to calculate DLPNO<sup>18</sup>-CCSD(T)<sup>19, 20</sup> / cc-pVTZ<sup>21</sup> single point energies. Energy decomposition analysis was performed with Q-Chem 5.4.0.<sup>22</sup> NBO and SOPT analyses were performed with the NBO 7.0 program suite.<sup>23</sup> Routine visualization and monitoring of calculations was performed with Chemcraft.<sup>24</sup> Plots of the noncovalent interactions (NCIs) were generated using Multiwfn<sup>25</sup> and rendered in VMD.<sup>26</sup>

### 2. Details of Computational Methods

#### Gaussian 16 DFT calculations

Geometries of ground state minima and transition states were optimized without constraints using the D3<sup>27</sup> dispersion-corrected M06-2X<sup>28</sup> DFA and the def2-TZVP<sup>29</sup> basis set in the PCM solvation model.<sup>30,31,32</sup> Separate geometry optimizations were conducted in DCM (“dichloromethane”), MeCN (“acetonitrile”), and HFIP (generic;  $\epsilon = 16.7$ ,<sup>33</sup>  $\epsilon_{\text{inf}} = 1.625625$ <sup>34</sup>) to account for solvent-dependent energy differences. Convergence criteria for these calculations was set to “tight” and an ultrafine grid was selected. Frequency calculations at the same level of theory were used to confirm the nature of the isolated stationary points. The quasi-harmonic approximation from Grimme<sup>35</sup> was applied via GoodVibes<sup>36</sup> to all structures to correct for potential errors associated with low



## Gaussian 16 M06-2X(D3) / def2-TZVP gas phase geometries

### CH<sub>4</sub>

E(RM062X) = -40.5002842996

Charge = 0 Multiplicity = 1

|   |              |              |              |
|---|--------------|--------------|--------------|
| C | -0.254074785 | -1.202515287 | -1.439874969 |
| H | 0.177115389  | -2.198073448 | -1.35870327  |
| H | -0.799607519 | -1.118234137 | -2.377416127 |
| H | 0.540571107  | -0.459983086 | -1.414803165 |
| H | -0.934927752 | -1.033198412 | -0.608298498 |

### <sup>3</sup>SO<sub>2</sub>

E(UM062X) = -548.512391044

Charge = 0 Multiplicity = 3

|   |               |              |               |
|---|---------------|--------------|---------------|
| S | -1.7801057043 | 0.5034266337 | 0.1543253008  |
| O | -3.2533388259 | 0.4285891145 | -0.0096854142 |
| O | -1.0643797899 | 0.8367126417 | 1.4110805836  |

### <sup>3</sup>TS<sub>A</sub>

E(UM062X) = -589.007500802

Charge = 0 Multiplicity = 3

|   |               |               |               |
|---|---------------|---------------|---------------|
| C | -0.2004082766 | -1.3325906449 | -1.4266472288 |
| H | -0.3046449572 | -1.8740299098 | -2.3638436352 |
| H | -0.8931650962 | -0.5005475625 | -1.3489119117 |
| H | 0.849687804   | -0.8941177289 | -1.4385951271 |
| H | -0.2640024544 | -1.9850551426 | -0.5614536959 |
| S | 2.2254784853  | 0.5505867779  | 0.1467515497  |
| O | 0.9528272996  | 0.399098485   | 0.8633196049  |
| O | 2.2381871956  | -0.2037442742 | -1.2492195559 |

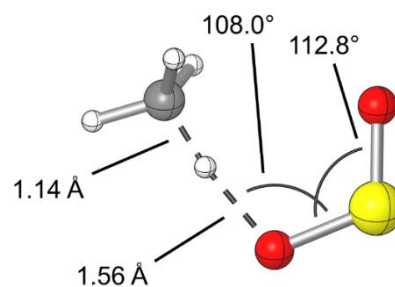

### CH<sub>3</sub>

E(UM062X) = -39.8240152694

Charge = 0    Multiplicity = 2

|   |               |               |               |
|---|---------------|---------------|---------------|
| C | -1.9647807545 | -1.480366792  | -1.1951321375 |
| H | -1.7984865952 | -1.9475311102 | -2.1512325274 |
| H | -2.3799050376 | -0.4876470431 | -1.1446459886 |
| H | -1.7136336128 | -2.0039880547 | -0.2879193466 |

### SO<sub>2</sub>H

E(UM062X) = -549.204348331

Charge = 0    Multiplicity = 2

|   |               |              |              |
|---|---------------|--------------|--------------|
| S | -1.7328236953 | 0.0083702296 | 0.177054192  |
| O | -2.8650023496 | 0.9373769293 | 0.163400545  |
| O | -0.5347874063 | 0.6945567178 | 1.0317970537 |
| H | -0.8098451858 | 1.5873122473 | 1.2934123833 |

### Q-Chem 5.4 M06-2X(D3) / def2-TZVP gas phase geometries

### CH<sub>4</sub>

E(RM062X) = -40.5001891867

Charge = 0    Multiplicity = 1

|   |             |              |              |
|---|-------------|--------------|--------------|
| C | 2.30396724  | -0.183860075 | -0.001021382 |
| H | 3.162743295 | 0.482884728  | -0.004084343 |
| H | 2.251385995 | -0.796167039 | -0.895679124 |
| H | 1.387974897 | 0.491654081  | -0.003862412 |
| H | 2.251735877 | -0.788271397 | 0.899017761  |



<sup>3</sup>SO<sub>2</sub>

E(UM062X) = -548.5054166

Charge = 0    Multiplicity = 3

|   |               |              |               |
|---|---------------|--------------|---------------|
| S | -1.7801057043 | 0.5034266337 | 0.1543253008  |
| O | -3.2533388259 | 0.4285891145 | -0.0096854142 |
| O | -1.0643797899 | 0.8367126417 | 1.4110805836  |

<sup>3</sup>TS<sub>A</sub>

E(UM062X) = -589.0003823

Charge = 0    Multiplicity = 3

|   |              |              |              |
|---|--------------|--------------|--------------|
| C | 2.30396724   | -0.183860075 | -0.001021382 |
| H | 3.162743295  | 0.482884728  | -0.004084343 |
| H | 2.251385995  | -0.796167039 | -0.895679124 |
| H | 1.387974897  | 0.491654081  | -0.003862412 |
| H | 2.251735877  | -0.788271397 | 0.899017761  |
| S | -1.133120695 | 0.11971034   | 0.002925564  |
| O | -0.600975712 | -1.248833254 | 0.005831246  |
| O | 0.007966842  | 1.222500262  | -0.003458666 |

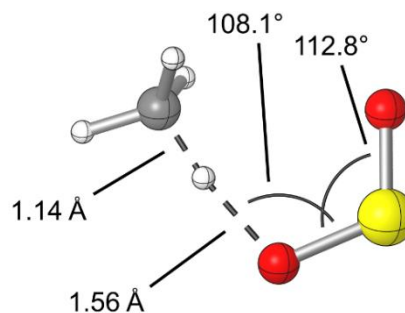

### 3.1 - Distortion/Interaction-Activation Strain Analysis of <sup>3</sup>TS<sub>A</sub>

A distortion/interaction-activation strain analysis<sup>41</sup> was performed on the <sup>3</sup>TS<sub>A</sub> transition state geometry optimized in Q-Chem at the M06-2X(D3) / def2-TZVP level of theory. The electronic activation energy associated with HAT from CH<sub>4</sub> to <sup>3</sup>SO<sub>2</sub>, ΔE<sup>‡</sup>, was partitioned into two terms:

$$\Delta E^{\ddagger} = \Delta E_{dist}^{\ddagger} + \Delta E_{int}^{\ddagger} \quad (1)$$

where ΔE<sup>‡</sup><sub>dist</sub> is the sum of the strain energy required for CH<sub>4</sub> and <sup>3</sup>SO<sub>2</sub> to achieve their respective distorted geometries at the <sup>3</sup>TS<sub>A</sub> transition state structure:

$$\Delta E_{dist}^{\ddagger} = \Delta E_{dist}^{\ddagger}(CH_4) + \Delta E_{dist}^{\ddagger}(^3SO_2) \quad (2)$$

$$\Delta E_{dist}^{\ddagger}(CH_4) = \Delta E_{dist}(CH_4) - \Delta E(CH_4) \quad (3)$$

$$\Delta E_{dist}^{\ddagger}(^3SO_2) = \Delta E_{dist}(^3SO_2) - \Delta E(^3SO_2) \quad (4)$$

and  $\Delta E_{int}^{\ddagger}$  is the interaction energy between the two distorted fragments at the transition state geometry:

$$\Delta E_{int}^{\ddagger} = \Delta E^{\ddagger} - \Delta E_{dist}^{\ddagger} \quad (5)$$

### 3.2 - Energy decomposition analysis of $^3TS_A$ $\Delta E_{int}^{\ddagger}$ term (ALMO-EDA2)

The second generation Absolutely Localized Molecular Orbital Energy Decomposition Analysis (ALMO-EDA2) method of Head-Gordon and co-workers<sup>42</sup> was employed to gain insight into the intermolecular forces underlying the HAT reaction of  $CH_4$  and  $^3SO_2$  at the  $^3TS_A$  transition state. This method decomposes the interaction energy,  $\Delta E_{int}^{\ddagger}$  into three initial terms:

$$\Delta E_{int}^{\ddagger} = \Delta E_{Frz} + \Delta E_{Pol} + \Delta E_{CT} \quad (1)$$

where  $\Delta E_{Frz}$  is the difference between the energy of the isolated, non-interacting fragments and the “frozen density” energy, the energy associated with bringing the fragments together in the transition state geometry without allowing intrafragment orbital relaxation nor interfragment delocalization, thus isolating the  $\Delta E_{Frz}$  term from polarization and charge transfer. The  $\Delta E_{Pol}$  term is the energy contribution associated with polarization obtained by allowing the frozen fragment-localized orbitals to relax without interfragment orbital delocalization. Finally, the  $\Delta E_{CT}$  term arises from the energy lowering effects of donor/acceptor interactions resulting from interfragment orbital delocalization(s).

Using ALMO-EDA2, the  $\Delta E_{Frz}$  term can be further decomposed into three constituent terms:

$$\Delta E_{Frz} = \Delta E_{Pauli} + \Delta E_{Elec} + \Delta E_{Disp} \quad (2)$$

Where  $\Delta E_{Pauli}$  represents Pauli repulsion,  $\Delta E_{Elec}$  represents permanent electrostatic contribution, and  $\Delta E_{Disp}$  represents attractive interactions associated with dispersion. ALMO-EDA2 was employed at the M06-2X(D3) / def2-TZVP level of theory in Q-Chem 5.4 using the  ${}^3\text{TS}_A$  geometry optimized at the same level of theory.

### 3.3 – Decomposition of the $\Delta E_{CT}$ term via Complementary Occupied-Virtual orbital Pairs (COVPs)

ALMO-EDA2 analysis of the  ${}^3\text{TS}_A$  transition state revealed that the most dominant contribution to the total interaction energy,  $\Delta E_{int}^\ddagger$ , arose from the Pauli repulsion term ( $\Delta E_{Pauli} = 36.6$  kcal/mol). The second greatest contribution to  $\Delta E_{int}^\ddagger$  resulted from the charge transfer term ( $\Delta E_{CT} = -18.6$  kcal/mol). To gain insight into the dominant donor/acceptor orbital interactions giving rise to  $\Delta E_{CT}$ , a Charge Decomposition Analysis (CDA) was performed using the Complementary Occupied-Virtual orbital Pairs (COVP) method<sup>43</sup> in tandem with the ALMO-EDA2 method at the M06-2X(D3) / def2-TZVP level of theory. This analysis revealed two major COVP contributions, with minor contributions from all other COVPs.

### 3.4 - NBO-derived SOPT analysis of ${}^3\text{TS}_A$

Evaluation of the intramolecular interactions between the  $\text{CH}_4$  and  ${}^3\text{SO}_2$  fragments was performed at the  ${}^3\text{TS}_A$  transition state geometry using NBO and second-order perturbative theory (SOPT) analyses (M06-2X(D3) / def2-TZVP) to identify the principal donor/acceptor NBO interactions. Two higher energy donor/acceptor pairs were identified. The first donor/acceptor pair, depicted below as **NBO-1**, corresponds with an interaction between a C–H  $\sigma$ -bonding NBO and an “LV” type NBO (signifying a “lone vacancy” type orbital) on the nearby oxygen atom (46.3 kcal/mol). The second highest

energy donor/acceptor pair corresponds to a donation from the same oxygen's LP (identified as LP (3) – corresponding to the  $^3\text{SO}_2$  SOMO-1) NBO to the C–H  $\sigma$  antibonding NBO of methane. A summary of the major donor/acceptor NBOs revealed through SOPT analysis of the Fock matrix in the NBO basis is provided in **Scheme S1**.

**Scheme S1. Summary of principal donor/acceptor NBOs in  $^3\text{TS}_A$  via SOPT**

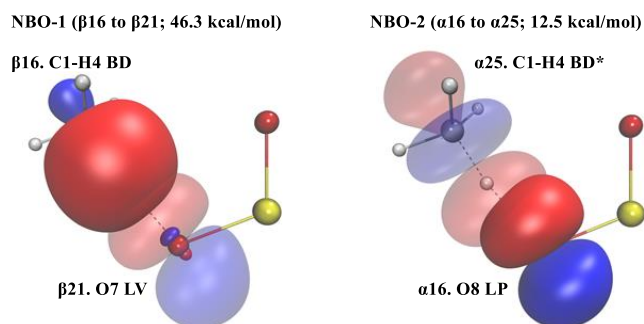

| <i>Entry</i> | <i>Donor NBO</i>              | <i>Acceptor NBO</i>             | $\Delta E$ (kcal/mol) |
|--------------|-------------------------------|---------------------------------|-----------------------|
| 1            | $\beta_{16}$ . BD (1) C1 - H4 | $\beta_{21}$ . LV (1) O8        | 46.27                 |
| 2            | $\alpha_{16}$ . LP (3) O8     | $\alpha_{25}$ . BD* (1) C1 - H4 | 12.45                 |
| 3            | $\alpha_{15}$ . LP (2) O8     | $\alpha_{25}$ . BD* (1) C1 - H4 | 4.83                  |
| 4            | $\beta_{12}$ . LP (1) O8      | $\beta_{24}$ . BD* (1) C1 - H4  | 4.96                  |
| 5            | $\beta_{11}$ . LP (2) O7      | $\beta_{22}$ . BD* (1) C1 - H2  | 0.28                  |
| 6            | $\alpha_{13}$ . LP (3) O7     | $\alpha_{23}$ . BD* (1) C1 - H2 | 0.21                  |
| 7            | $\alpha_{11}$ . LP (1) O7     | $\alpha_{23}$ . BD* (1) C1 - H2 | 0.12                  |
| 8            | $\beta_{10}$ . LP (1) O7      | $\beta_{22}$ . BD* (1) C1 - H2  | 0.10                  |

NBO images were rendered in VMD with an isosurface value of  $\pm 0.03$ . The opaque orbitals correspond to donor NBOs whereas translucent orbitals correspond to acceptor NBOs.

### 3.5 – ${}^3\text{TS}_A$ NCI Plot and analysis of other interactions

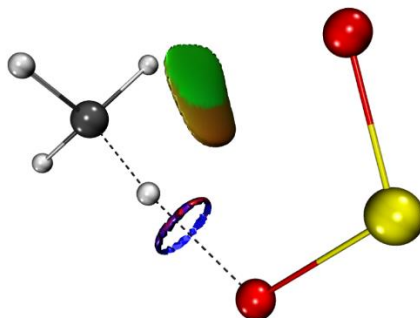

The noncovalent interactions of the  ${}^3\text{TS}_A$  transition state were calculated at the M06-2X(D3) / def2-TZVP level of theory and subsequently plotted using Multiwfn and VMD. The NCI plot reveals, in addition to the strong interaction corresponding to the forming O–H bond, an additional favorable interaction between the second  $\text{SO}_2$  oxygen atom (O7) and the methane moiety. This secondary stabilization can be rationalized by referring to the donor/acceptor NBO interactions described in entries 5 and 6 of **Scheme S1** which describe favorable interactions between the lone pair of O7 and antibonding C1-H2 NBOs. NBO plots for entries 5 and 6 of **Scheme S2**, below, show the favorable NBO donor/acceptor interactions corresponding to the stabilization revealed in the NCI plot.

#### Scheme S2. NBOs corresponding to LP / C-H $\sigma^*$ stabilization

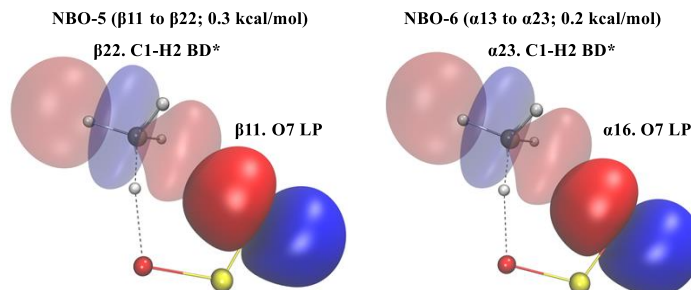

#### 4. Calculation of the reduction potentials of the sulfur dioxide species involved in the deactivation process

The reduction potentials of the O/R  $^3\text{SO}_2/\text{SO}_2^-$  and  $\text{SO}_2/\text{SO}_2^-$  couples were calculated by taking the absolute difference in free energies of the optimized structures calculated at the  $\omega\text{B97XD} / \text{def2-QZVPP} / \text{PCM}(\text{MeCN})//\text{M06-2X(D3)} / \text{def2-TZVP} / \text{PCM}(\text{MeCN})$  level of theory, converting the free energy value to units of eV, and subtracting the value of the absolute potential of the saturated calomel electrode (SCE) in MeCN.<sup>44</sup>

$$E_{\text{O/R,MeCN}}^{\ominus} = E_{\text{O/R,MeCN}}^{\ominus} - 4.43 \text{ V}$$

#### 5. Calculation of Boltzmann average $\Delta G$ and $\Delta G^\ddagger$ for the HAT steps in Figure 5

To improve the accuracy of the DFT computational analysis of the regioselectivity of the C–H sulfination of ketone **32** in DCM and HFIP, the  $\Delta G$  and  $\Delta G^\ddagger$  for the HAT steps in Figure 5 were calculated as Boltzmann averages of the conformers found for each compound. The Boltzmann average  $G$  values were calculated following equations (1), (2), and (3):

$$G_{av} = \sum_i (G_i * p_i) \quad (1)$$

$$p_i = \frac{e^{\left(\frac{-\Delta G}{RT}\right)}}{\sum_i \left[ e^{\left(\frac{-\Delta G}{RT}\right)} \right]} \quad (2)$$

$$\Delta G = G_i - G_o \quad (3)$$

where  $G_i$  is the free energy of conformer  $i$ ,  $G_o$  is the free energy of the lowest conformer, and  $p_i$  is the probability for conformer  $i$  at 298.15 K.

The Gibbs free energy and Boltzmann average values are given below in kcal/mol. The Boltzmann averaged  $\Delta\Delta G^\ddagger$  ( $\Delta G^\ddagger_{33} - \Delta G^\ddagger_{34}$ ) are in agreement with the experimentally derived values for products **33** and **34** in DCM (–1.3 kcal/mol) and HFIP (0.3 kcal/mol).

| <sup>3</sup> TS <sub>B</sub> | G(kcal/mol)         |
|------------------------------|---------------------|
| a                            | -539396.3359        |
| b                            | -539396.5551        |
| c                            | -539396.5085        |
| d                            | -539396.3845        |
| e                            | -539396.1699        |
| f                            | -539396.0755        |
| g                            | -539395.8721        |
| <b>G<sub>av</sub></b>        | <b>-539396.3501</b> |

| S1                    | G(kcal/mol)         |
|-----------------------|---------------------|
| a                     | -195163.2175        |
| b                     | -195163.1319        |
| c                     | -195163.0701        |
| d                     | -195162.8402        |
| e                     | -195162.8258        |
| f                     | -195162.8042        |
| g                     | -195161.261         |
| h                     | -195160.8733        |
| <b>G<sub>av</sub></b> | <b>-195163.0023</b> |

| S6                    | G(kcal/mol)        |
|-----------------------|--------------------|
| a                     | -690867.0882       |
| b                     | -690867.0695       |
| c                     | -690867.0641       |
| d                     | -690866.9479       |
| e                     | -690865.6221       |
| f                     | -690865.5923       |
| g                     | -690865.1013       |
| h                     | -690864.2254       |
| <b>G<sub>av</sub></b> | <b>-690866.964</b> |

| <sup>3</sup> TS <sub>C</sub> | G(kcal/mol)         |
|------------------------------|---------------------|
| a                            | -859.5855945        |
| b                            | -859.5830385        |
| c                            | -859.5828361        |
| <b>G<sub>av</sub></b>        | <b>-539397.5181</b> |

| <sup>3</sup> TS <sub>E</sub> | G(kcal/mol)         |
|------------------------------|---------------------|
| a                            | -1035099.600        |
| b                            | -1035099.292        |
| c                            | -1035099.202        |
| d                            | -1035099.173        |
| e                            | -1035098.927        |
| f                            | -1035098.642        |
| g                            | -1035098.505        |
| h                            | -1035098.437        |
| i                            | -1035098.187        |
| j                            | -1035097.591        |
| k                            | -1035097.245        |
| l                            | -1035097.213        |
| <b>G<sub>av</sub></b>        | <b>-1035099.146</b> |

| <sup>3</sup> TS <sub>D</sub> | G(kcal/mol)         |
|------------------------------|---------------------|
| a                            | -1035099.978        |
| b                            | -1035099.936        |
| c                            | -1035099.801        |
| d                            | -1035099.639        |
| e                            | -1035099.567        |
| f                            | -1035099.512        |
| g                            | -1035099.323        |
| h                            | -1035099.124        |
| i                            | -1035098.928        |
| j                            | -1035098.804        |
| k                            | -1035098.537        |
| l                            | -1035098.535        |
| m                            | -1035098.111        |
| n                            | -1035097.758        |
| <b>G<sub>av</sub></b>        | <b>-1035099.616</b> |

## 6. DFT-Optimized Geometries

### 6.1 – $\omega$ B97XD / def2-QZVPP / PCM (DCM) // M06-2X (D3) / def2-TZVP / PCM (DCM)

#### S1-a

E(RM062X) = -311.068414670

E(R $\omega$ B97XD) = -311.148747020

Charge = 0    Multiplicity = 1

|   |                 |                 |                 |
|---|-----------------|-----------------|-----------------|
| H | -3.417876322400 | -0.208812416200 | -0.229267577600 |
| C | -2.498949087600 | -0.689225527200 | -0.554916174600 |
| H | -2.507754194300 | -1.748304549700 | -0.294336984400 |
| H | -2.421097360300 | -0.626363881900 | -1.642868248300 |
| C | 1.251317923600  | 0.110729739400  | 0.222126852900  |
| H | 1.085308030300  | 0.608287549800  | 1.180923377500  |
| C | -1.302184899300 | -0.005559170000 | 0.051765827200  |
| O | -1.399284886400 | 1.055957974000  | 0.623849931300  |
| C | 0.018256054200  | -0.730851636500 | -0.081714390600 |
| H | 0.079768975000  | -1.164550957900 | -1.086018279900 |
| H | -0.044368829300 | -1.586749630500 | 0.601743699100  |
| C | 2.483337966500  | -0.781239365500 | 0.337228269400  |
| H | 3.372425505600  | -0.189272878900 | 0.559745441800  |
| H | 2.363878826900  | -1.525752765000 | 1.126213560600  |
| C | 1.457870087700  | 1.179718775300  | -0.847285865600 |
| H | 0.587517856000  | 1.830469971400  | -0.932941349700 |
| H | 2.324331854200  | 1.800190239300  | -0.613393725100 |
| H | 1.634656738700  | 0.711019958900  | -1.819413550700 |
| H | 2.660841688400  | -1.311322868300 | -0.602363064700 |

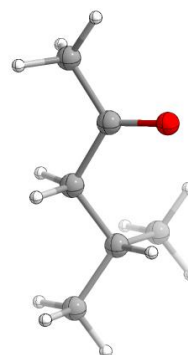



### S1-b

E(RM062X) = -311.068417279

E(RωB97XD) = -311.148753609

Charge = 0    Multiplicity = 1

|   |               |               |               |
|---|---------------|---------------|---------------|
| H | -2.8643967015 | 1.8293492133  | -1.1513297811 |
| C | -1.8565068807 | 1.8396750312  | -0.7446955392 |
| H | -1.2698800767 | 2.6412464756  | -1.1951070263 |
| H | -1.8993993136 | 2.036969753   | 0.329095178   |
| C | 0.9026886247  | -0.9299827307 | -0.5944752567 |
| H | 0.556656146   | -1.5141716398 | -1.450865966  |
| C | -1.1864894858 | 0.5084290021  | -0.9598253808 |
| O | -1.8081161491 | -0.4644954529 | -1.3210753951 |
| C | 0.3052802555  | 0.4664414676  | -0.7145305743 |
| H | 0.5310849993  | 1.0649480663  | 0.1750209977  |
| H | 0.7574558502  | 1.0101033592  | -1.5534113432 |
| C | 2.425810684   | -0.8563281031 | -0.6323162712 |
| H | 2.8651939534  | -1.8518285132 | -0.5528487389 |
| H | 2.7797944732  | -0.4009979095 | -1.5588238873 |
| C | 0.4282643135  | -1.6177978435 | 0.6825369164  |
| H | 0.7632293726  | -1.0570022072 | 1.5596214458  |
| H | -0.658854662  | -1.6902058586 | 0.7155462905  |
| H | 0.8380465789  | -2.6264145997 | 0.7546897112  |
| H | 2.800638018   | -0.2576375101 | 0.2021946206  |

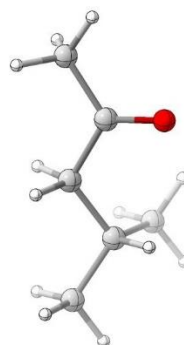

### S1-c

E(RM062X) = -311.068426387

E(RωB97XD) = -311.148747123

Charge = 0    Multiplicity = 1

|   |              |               |               |
|---|--------------|---------------|---------------|
| H | -2.738950664 | -0.5007637446 | -1.3151247224 |
|---|--------------|---------------|---------------|

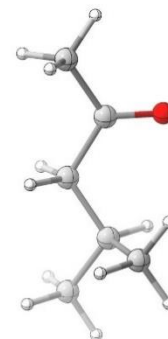

[Go back to table of contents](#)

|   |               |               |               |
|---|---------------|---------------|---------------|
| C | -2.4937471115 | -0.8477028226 | -0.3106521764 |
| H | -3.3428662492 | -0.7193581915 | 0.3555416636  |
| H | -2.2492530261 | -1.9098129078 | -0.3878886273 |
| C | 1.1859515292  | 0.4631217935  | -0.0909521084 |
| H | 0.9812934043  | 1.3302733842  | 0.5418950861  |
| C | -1.2895557516 | -0.1172785114 | 0.2222013835  |
| O | -1.2628301543 | 0.327898853   | 1.3467700588  |
| C | -0.1285145557 | 0.0395953038  | -0.7342577559 |
| H | -0.4540649002 | 0.7808126531  | -1.474738661  |
| H | -0.0061376521 | -0.8949687529 | -1.2929870471 |
| C | 1.7473914551  | -0.6525654865 | 0.7859279445  |
| H | 1.0419568932  | -0.9390799543 | 1.5660028084  |
| H | 1.9668763809  | -1.5350912946 | 0.1785072084  |
| C | 2.1935474786  | 0.8635594745  | -1.1637687353 |
| H | 1.8197417711  | 1.6876216157  | -1.7739127997 |
| H | 3.1375609162  | 1.1744428545  | -0.7136518671 |
| H | 2.4011766444  | 0.0198794532  | -1.8274251195 |
| H | 2.6754893054  | -0.3386237841 | 1.266070592   |

### S1-d

E(RM062X) = -311.067895079

E(RωB97XD) = -311.148682715

Charge = 0    Multiplicity = 1

|   |              |               |               |
|---|--------------|---------------|---------------|
| H | 0.0434008225 | -0.143549593  | 0.0002672932  |
| C | 1.1277496944 | -0.2164247243 | 0.0059137272  |
| H | 1.5757931397 | 0.7352646195  | 0.293164275   |
| H | 1.4304089007 | -0.9547461134 | 0.7527554515  |
| C | 3.9883860308 | -1.2226295273 | -0.5979313791 |
| H | 3.7877628166 | -0.7977571069 | 0.3902644414  |

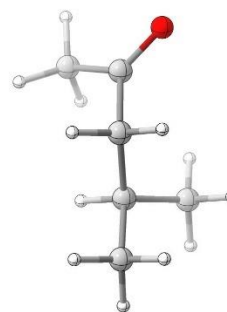

[Go back to table of contents](#)

|   |              |               |               |
|---|--------------|---------------|---------------|
| C | 1.6230034224 | -0.6582821711 | -1.3474191975 |
| O | 0.8684780909 | -1.125471283  | -2.1710450275 |
| C | 3.0993256855 | -0.5047943353 | -1.6230556852 |
| H | 3.3297031072 | 0.5655746012  | -1.612024768  |
| H | 3.2992739368 | -0.8878139488 | -2.6258234959 |
| C | 3.6767682191 | -2.7158035431 | -0.5627993927 |
| H | 4.3116497586 | -3.2276801749 | 0.1614853865  |
| H | 2.6363434559 | -2.9114497758 | -0.2941677556 |
| C | 5.4573585561 | -0.9829190422 | -0.9287372152 |
| H | 5.6954239184 | -1.3906395301 | -1.9142458737 |
| H | 5.6933098094 | 0.0822846082  | -0.9372422473 |
| H | 6.1040325854 | -1.4706575964 | -0.1979611967 |
| H | 3.8557280494 | -3.1609053632 | -1.5448973405 |

### S1-e

E(RM062X) = -311.067891266

E(R $\omega$ B97XD) = -311.148683711

Charge = 0    Multiplicity = 1

|   |               |               |               |
|---|---------------|---------------|---------------|
| H | -1.3875419913 | 1.7227966821  | -0.451943951  |
| C | -1.9504454502 | 0.7876652419  | -0.5076976128 |
| H | -2.9552435594 | 0.9570688622  | -0.1296679354 |
| H | -1.9786800465 | 0.4903048432  | -1.5563594533 |
| C | 1.0822364268  | 0.2000259985  | -0.5774396189 |
| H | 0.6683235492  | 0.8795254294  | -1.3285755615 |
| C | -1.2518836994 | -0.2537568987 | 0.3286669322  |
| O | -1.6855034647 | -0.5872009141 | 1.4087771863  |
| C | 0.0158527206  | -0.8496837942 | -0.2343096669 |
| H | -0.2516769284 | -1.4011244083 | -1.1416312872 |
| H | 0.4101186977  | -1.5605283285 | 0.4947215298  |

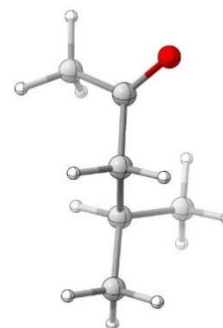

[Go back to table of contents](#)

|   |              |               |               |
|---|--------------|---------------|---------------|
| C | 1.462705741  | 1.0090289477  | 0.6589289667  |
| H | 1.8685098078 | 0.3496085556  | 1.4303519074  |
| H | 2.2219246082 | 1.753755324   | 0.4167319672  |
| C | 2.3067870997 | -0.4818690193 | -1.1776098717 |
| H | 2.7466322005 | -1.1752735983 | -0.4565782688 |
| H | 2.0465941206 | -1.0462041169 | -2.074384585  |
| H | 3.067720589  | 0.2528053959  | -1.444781411  |
| H | 0.6044962206 | 1.531815819   | 1.0867840399  |

### S1-f

E(RM062X) = -311.067890040

E(RωB97XD) = -311.148689384

Charge = 0    Multiplicity = 1

|   |               |               |               |
|---|---------------|---------------|---------------|
| H | -1.7450497711 | -1.6008629856 | 1.0395700561  |
| C | -1.8839606828 | -0.524781273  | 0.9310831334  |
| H | -2.9367906342 | -0.2648508227 | 1.0027858674  |
| H | -1.3427922399 | -0.0450419325 | 1.7504558011  |
| C | 1.1265539764  | -0.3463031175 | 0.2513667545  |
| H | 0.8331581992  | -0.8452106596 | 1.1799267644  |
| C | -1.3200879803 | -0.0384657929 | -0.3795143474 |
| O | -1.9193623787 | 0.7609552981  | -1.063462074  |
| C | 0.0264402919  | -0.5820967846 | -0.79290955   |
| H | 0.3038916604  | -0.1174482128 | -1.7412254709 |
| H | -0.0873702879 | -1.6584558313 | -0.9585741971 |
| C | 2.4358282845  | -0.9643755836 | -0.2268363076 |
| H | 2.3262336182  | -2.0346814206 | -0.4079495841 |
| H | 2.7591014526  | -0.4942704277 | -1.1588634226 |
| C | 1.2995694418  | 1.1440152232  | 0.5285394133  |
| H | 2.0819594189  | 1.3125505434  | 1.2695594575  |

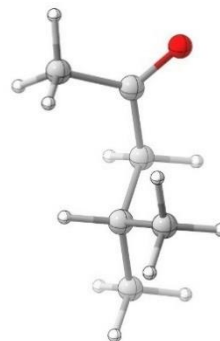

|   |              |               |               |
|---|--------------|---------------|---------------|
| H | 1.582804587  | 1.6671111419  | -0.3884147805 |
| H | 0.3804276266 | 1.60134202    | 0.9011975115  |
| H | 3.2249376451 | -0.8217848869 | 0.5128200804  |

### S1-g

E(RM062X) = -311.065694264

E(RωB97XD) = -311.145800992

Charge = 0    Multiplicity = 1

|   |              |               |               |
|---|--------------|---------------|---------------|
| H | 0.1196548881 | 0.3379216503  | -0.0862290667 |
| C | 1.1634871745 | 0.0310583323  | -0.0157851051 |
| H | 1.7663664635 | 0.9413631674  | 0.0214629252  |
| H | 1.3296577307 | -0.5475734596 | 0.8891581145  |
| C | 1.6631306565 | -0.8603897715 | -3.829240339  |
| H | 1.2561235373 | -0.2722327223 | -4.6577168163 |
| C | 1.571747656  | -0.7675537992 | -1.2289152059 |
| O | 2.2146766613 | -1.7866073848 | -1.1208576203 |
| C | 1.129524209  | -0.1978672761 | -2.559340204  |
| H | 1.3864374819 | 0.8669929581  | -2.5481978922 |
| H | 0.0334543112 | -0.2254614712 | -2.5506288618 |
| C | 3.1857738577 | -0.7856911991 | -3.9214287578 |
| H | 3.5261624969 | -1.1560484007 | -4.889845223  |
| H | 3.5361534445 | 0.2429381522  | -3.8133116655 |
| C | 1.1599197312 | -2.2925835264 | -3.9980410516 |
| H | 1.5671741236 | -2.9405951199 | -3.2231120899 |
| H | 0.0700875899 | -2.3344288975 | -3.9436621948 |
| H | 1.4626645402 | -2.6876822611 | -4.9693271621 |
| H | 3.6514034459 | -1.3904589708 | -3.1435817837 |

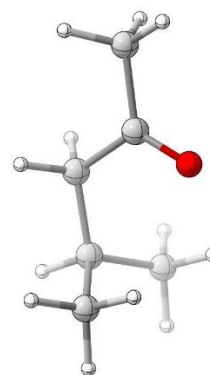

### S1-h

E(RM062X) = -311.065904099

E(R $\omega$ B97XD) = -311.146315150

Charge = 0    Multiplicity = 1

|   |               |               |               |
|---|---------------|---------------|---------------|
| H | -2.906225195  | -1.104703366  | -0.4471290344 |
| C | -2.1828274183 | -1.8643863607 | -0.1478796329 |
| H | -2.0246702251 | -1.7445936227 | 0.9270434381  |
| H | -2.5658082656 | -2.8607513873 | -0.3529183644 |
| C | -0.5084532581 | 0.4954741524  | -2.1704563512 |
| H | -0.138308241  | 1.510883493   | -2.0052562329 |
| C | -0.8687517216 | -1.6461052388 | -0.8483492541 |
| O | -0.2865747044 | -2.5544673517 | -1.3990784612 |
| C | -0.2979845225 | -0.2451068169 | -0.8322881686 |
| H | 0.7723809874  | -0.3229891329 | -0.6334952303 |
| H | -0.7619492357 | 0.3291792654  | -0.0282977504 |
| C | 0.3018609636  | -0.123227262  | -3.3046833241 |
| H | 1.3620275259  | -0.1739469739 | -3.0518552581 |
| H | -0.039377661  | -1.1363258115 | -3.522143647  |
| C | -1.984706645  | 0.5876398344  | -2.5469831311 |
| H | -2.5794724225 | 1.0220525554  | -1.7410242414 |
| H | -2.1128532217 | 1.2087585648  | -3.4343574977 |
| H | -2.3923080719 | -0.4005849842 | -2.7777803446 |
| H | 0.1943765693  | 0.4737544645  | -4.211864829  |

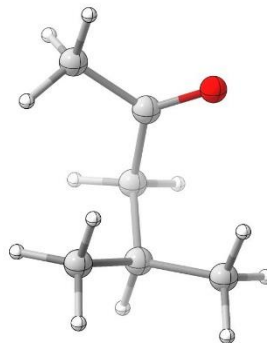

### <sup>3</sup>SO<sub>2</sub>

E(UM062X) = -548.515729039

E(U $\omega$ B97XD) = -548.568257334

Charge = 0    Multiplicity = 3

|   |               |              |              |
|---|---------------|--------------|--------------|
| S | -1.7776107479 | 0.5025751827 | 0.1507253422 |
|---|---------------|--------------|--------------|

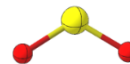

O -3.2523449425 0.4294325772 -0.0064312776  
O -1.0678686296 0.8367206301 1.4114264054

### <sup>3</sup>T<sub>B-a</sub>

E(UM062X) = -859.583389402

E(UωB97XD) = -859.714244089

Charge = 0 Multiplicity = 3

C 0.0539761616 -1.3079862153 3.7814995762  
H 0.6764015311 -0.4632739303 4.0789707248  
H 0.080264574 -2.0305988411 4.6006030029  
C 2.5854952577 -3.1597062982 1.4554614508  
H -0.9708008077 -0.9875010712 3.6139122356  
C 0.6095668632 -1.96618853 2.5479990106  
O -0.096061272 -2.2843280662 1.6191569659  
C 2.1062240919 -2.1941321707 2.5323723594  
H 2.4203341927 -2.5313230102 3.5262080705  
H 2.5567664375 -1.2024878371 2.3992486582  
C 4.0858296775 -3.0644660062 1.2689949198  
H 4.470043455 -3.7608092439 0.5225569327  
H 4.4319348943 -2.0533036771 1.0510949774  
O 5.0483608524 -3.3405089926 3.7958057286  
O 5.7700717004 -1.7310704747 5.4256526344  
S 5.4736757378 -1.792749824 3.9850692572  
H 4.5910934838 -3.3853687868 2.2351037073  
H 2.1197991194 -2.8583644981 0.5106735135  
C 2.1634012821 -4.5914554865 1.7703860186  
H 2.6240467001 -4.9207494907 2.7056463374  
H 1.08142705 -4.6672213839 1.8738655015  
H 2.4788430172 -5.2733201653 0.9798274168

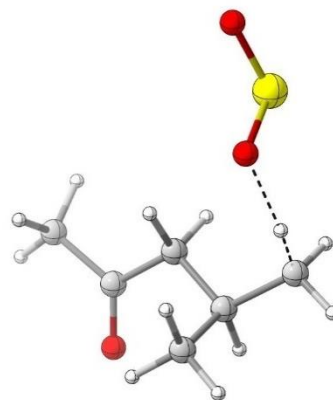

### **<sup>3</sup>TS<sub>B</sub>-b**

E(UM062X) = -859.583575678

E(UωB97XD) = -859.714424753

Charge = 0    Multiplicity = 3

|   |               |               |               |
|---|---------------|---------------|---------------|
| C | 1.9059254194  | 0.4807807684  | 2.0166409088  |
| H | 1.44512248    | 0.5433113092  | 3.0030099076  |
| H | 1.100401441   | 0.5393674258  | 1.2808256605  |
| C | 2.4630928611  | -3.3928565673 | 1.877238282   |
| H | 1.287901577   | -3.5595767316 | 0.0698058777  |
| C | 2.6142799791  | -0.8356937388 | 1.8457007245  |
| O | 3.7259273891  | -0.9068685325 | 1.373990146   |
| C | 1.8588279686  | -2.0624858756 | 2.3071761538  |
| H | 0.8189581929  | -1.9821237893 | 1.9707478985  |
| H | 1.8163481742  | -1.9987115063 | 3.4006428406  |
| C | 2.3819041674  | -3.5766666781 | 0.3739936448  |
| H | 2.8410004366  | -2.7655301067 | -0.1903792403 |
| H | 2.7850335717  | -4.5352481998 | 0.0455049118  |
| O | -0.2579546806 | -4.0332835217 | -0.1230418558 |
| O | -1.506912136  | -6.054149954  | -0.4648969809 |
| S | -0.1027239788 | -5.6256057177 | -0.3554231043 |
| H | 2.5959410221  | 1.3064050662  | 1.8641890773  |
| C | 1.7937859678  | -4.547286918  | 2.6155634048  |
| H | 0.7165155561  | -4.5467085621 | 2.4300928744  |
| H | 2.1938122945  | -5.5077604099 | 2.2864477241  |
| H | 1.9470622214  | -4.4643571948 | 3.6921193931  |
| H | 3.5276655762  | -3.3781622138 | 2.1352990048  |

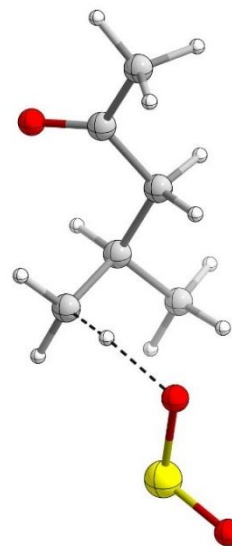



**<sup>3</sup>TS<sub>B-c</sub>**

E(UM062X) = -859.583304359

E(UωB97XD) = -859.714223146

Charge = 0    Multiplicity = 3

|   |               |               |               |
|---|---------------|---------------|---------------|
| C | -0.2531643858 | -0.5670682248 | 2.1943403268  |
| H | 0.0351230498  | -0.044423325  | 1.2791961805  |
| H | 0.1618073716  | -0.0030831418 | 3.030557298   |
| C | 2.4196009075  | -3.4079539322 | 1.9733443491  |
| H | 4.4623879761  | -2.6965134385 | 2.0412050861  |
| C | 0.3257209843  | -1.9552046359 | 2.1546655024  |
| O | -0.3670239868 | -2.9325538087 | 1.9894712016  |
| C | 1.822511901   | -2.0583547852 | 2.351286128   |
| H | 1.9998486259  | -1.836909103  | 3.4105279094  |
| H | 2.3097736142  | -1.2496124562 | 1.7957830871  |
| C | 3.8365140131  | -3.5294657982 | 2.4955918069  |
| H | 3.922227938   | -3.3774667151 | 3.5723886937  |
| H | 4.3120794001  | -4.4688075083 | 2.2115248853  |
| O | 5.3091447896  | -1.8566031962 | 0.9423278612  |
| O | 6.7260381754  | -2.2558290591 | -0.9545265675 |
| S | 6.0003650701  | -3.0273760685 | 0.0677967098  |
| H | -1.3369831306 | -0.608628528  | 2.2619950496  |
| C | 2.3627255635  | -3.6371278443 | 0.4661411194  |
| H | 2.9118695029  | -2.849207927  | -0.0565197229 |
| H | 2.8108305493  | -4.5958384498 | 0.1999894672  |
| H | 1.3338361299  | -3.6304414679 | 0.108537484   |
| H | 1.8249879867  | -4.1865885802 | 2.4641200834  |

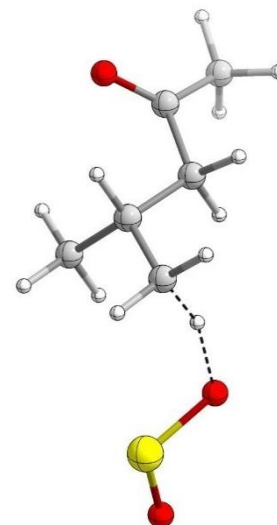

### <sup>3</sup>TS<sub>B-d</sub>

E(UM062X) = -859.583551165

E(UωB97XD) = -859.714397696

Charge = 0    Multiplicity = 3

|   |               |               |               |
|---|---------------|---------------|---------------|
| C | -0.1730106787 | -0.5366424    | 2.1935557753  |
| H | 0.1045056265  | -0.033783719  | 1.264071157   |
| H | 0.281896249   | 0.0250388479  | 3.01037498    |
| C | 2.4243825382  | -3.448387452  | 1.9511173846  |
| H | 3.9834221125  | -3.3856400574 | 3.4634220961  |
| C | 0.3642036344  | -1.9420989763 | 2.1548328033  |
| O | -0.3617667823 | -2.8986479698 | 2.0097403595  |
| C | 1.8597492996  | -2.0859336398 | 2.3286952428  |
| H | 2.0495348549  | -1.872889916  | 3.3885747641  |
| H | 2.3637917203  | -1.2852712206 | 1.7774632551  |
| C | 3.8826741435  | -3.5551993336 | 2.3635081792  |
| H | 4.2962775776  | -4.5469407571 | 2.1745593946  |
| H | 4.4992941855  | -2.8029952499 | 1.8699451299  |
| O | 4.0245222704  | -2.6771769418 | 5.0847646801  |
| O | 4.6683946798  | -0.673938556  | 3.6417264917  |
| S | 4.4641346632  | -1.1618003893 | 5.0147142832  |
| H | -1.2553381684 | -0.5452511482 | 2.2915103376  |
| C | 2.3019437579  | -3.6970633166 | 0.445996777   |
| H | 2.8658949739  | -2.9425441306 | -0.1081038866 |
| H | 2.6993598249  | -4.6775189027 | 0.1813839174  |
| H | 1.2599061881  | -3.6535118212 | 0.1301980337  |
| H | 1.8470453292  | -4.2122579499 | 2.4768488439  |

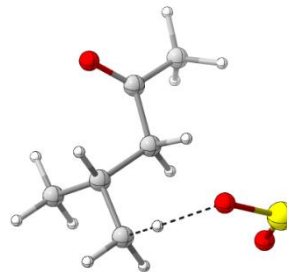

**<sup>3</sup>TS<sub>B-e</sub>**

E(UM062X) = - 859.583575678

E(UωB97XD) = -859.713484271

Charge = 0    Multiplicity = 3

|   |               |               |               |
|---|---------------|---------------|---------------|
| C | 1.9059254194  | 0.4807807684  | 2.0166409088  |
| H | 1.44512248    | 0.5433113092  | 3.0030099076  |
| H | 1.100401441   | 0.5393674258  | 1.2808256605  |
| C | 2.4630928611  | -3.3928565673 | 1.877238282   |
| H | 1.287901577   | -3.5595767316 | 0.0698058777  |
| C | 2.6142799791  | -0.8356937388 | 1.8457007245  |
| O | 3.7259273891  | -0.9068685325 | 1.373990146   |
| C | 1.8588279686  | -2.0624858756 | 2.3071761538  |
| H | 0.8189581929  | -1.9821237893 | 1.9707478985  |
| H | 1.8163481742  | -1.9987115063 | 3.4006428406  |
| C | 2.3819041674  | -3.5766666781 | 0.3739936448  |
| H | 2.8410004366  | -2.7655301067 | -0.1903792403 |
| H | 2.7850335717  | -4.5352481998 | 0.0455049118  |
| O | -0.2579546806 | -4.0332835217 | -0.1230418558 |
| O | -1.506912136  | -6.054149954  | -0.4648969809 |
| S | -0.1027239788 | -5.6256057177 | -0.3554231043 |
| H | 2.5959410221  | 1.3064050662  | 1.8641890773  |
| C | 1.7937859678  | -4.547286918  | 2.6155634048  |
| H | 0.7165155561  | -4.5467085621 | 2.4300928744  |
| H | 2.1938122945  | -5.5077604099 | 2.2864477241  |
| H | 1.9470622214  | -4.4643571948 | 3.6921193931  |
| H | 3.5276655762  | -3.3781622138 | 2.1352990048  |

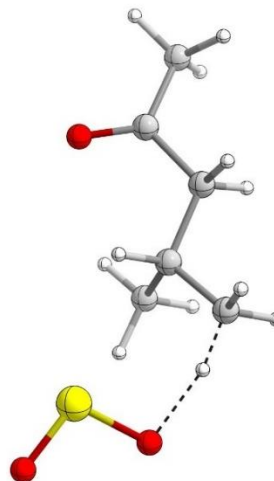

### <sup>3</sup>TS<sub>B-f</sub>

E(UM062X) = -859.582507520

E(UωB97XD) = -859.713451817

Charge = 0    Multiplicity = 3

|   |               |               |               |
|---|---------------|---------------|---------------|
| C | -0.3007349884 | -0.585625078  | 2.1612994151  |
| H | 0.0113789747  | -0.0464271585 | 1.2636944841  |
| H | 0.0808111518  | -0.0303445412 | 3.0188865065  |
| C | 2.4126740789  | -3.3925427261 | 1.9979740111  |
| H | 3.8672771014  | -3.337017974  | 3.6170147369  |
| C | 0.2934668579  | -1.9672376557 | 2.1195778217  |
| O | -0.3816615774 | -2.9481722506 | 1.9100970666  |
| C | 1.7824543684  | -2.0583518202 | 2.3749265201  |
| H | 1.9059510238  | -1.8626447439 | 3.4473691332  |
| H | 2.2824266359  | -1.2287698626 | 1.8628373591  |
| C | 3.8460373006  | -3.467923148  | 2.4875852008  |
| H | 4.3121425787  | -4.4377054586 | 2.3106692418  |
| H | 4.4710020047  | -2.6773236711 | 2.0656023018  |
| O | 3.9525244049  | -2.5756720201 | 5.0322288429  |
| O | 4.5975482429  | -0.440725038  | 5.9293567289  |
| S | 4.6701465629  | -1.1770478876 | 4.65693611    |
| H | -1.3857015075 | -0.6388758725 | 2.1926166912  |
| C | 2.3902718568  | -3.607720634  | 0.4820124486  |
| H | 2.9594778342  | -2.8218794785 | -0.0203861666 |
| H | 2.8333711831  | -4.5685452443 | 0.2188576743  |
| H | 1.36672545    | -3.5890980337 | 0.1089174358  |
| H | 1.8329124617  | -4.188587703  | 2.4695634362  |

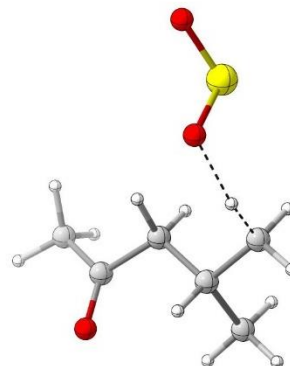

### <sup>3</sup>TS<sub>B-g</sub>

E(UM062X) = -859.582600458

E(UωB97XD) = -859.713451817

Charge = 0    Multiplicity = 3

|   |               |               |              |
|---|---------------|---------------|--------------|
| C | 0.2634737363  | -0.7376355103 | 3.6028363636 |
| H | 0.9552642306  | 0.0727974836  | 3.8346910439 |
| H | 0.1126521875  | -1.3062275649 | 4.5235310407 |
| C | 2.7615117812  | -3.2266165548 | 1.9188966155 |
| H | -0.6892318432 | -0.3412803458 | 3.2618097957 |
| C | 0.8513249697  | -1.6567076321 | 2.5659355574 |
| O | 0.2081519349  | -2.0517747005 | 1.6224400952 |
| C | 2.302090927   | -2.0439245647 | 2.7701921234 |
| H | 2.4699975798  | -2.2399567754 | 3.8342044433 |
| H | 2.8855205558  | -1.1451426966 | 2.5381359859 |
| O | 5.0615585553  | -5.6834017469 | 0.9467677187 |
| O | 5.6206498291  | -7.7732969795 | 1.9930876867 |
| S | 5.3003295286  | -6.3893758251 | 2.3798910735 |
| C | 4.2739238845  | -3.3154105745 | 1.9802088526 |
| H | 4.6389456408  | -3.5040738914 | 2.9925655794 |
| H | 4.6173003914  | -4.1918346747 | 1.3423057492 |
| H | 4.7843036535  | -2.4482512856 | 1.5595110361 |
| C | 2.1139207202  | -4.5257970624 | 2.3870889659 |
| H | 2.3962390052  | -5.3556994892 | 1.7373532106 |
| H | 2.4367045386  | -4.7665910294 | 3.4039571062 |
| H | 1.0273565732  | -4.4469903084 | 2.3799121073 |
| H | 2.4577516201  | -3.0312422714 | 0.8885008491 |

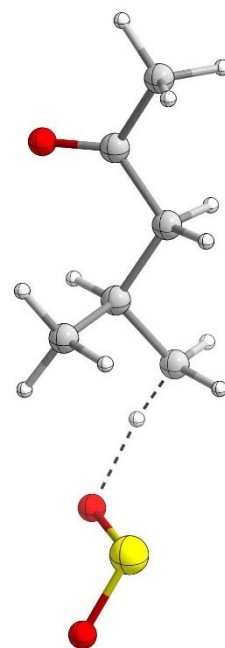

### <sup>3</sup>TSc-a

E(UM062X) = -859.587174533

E(UωB97XD) = -859.716968504

Charge = 0    Multiplicity = 3

|   |               |               |               |
|---|---------------|---------------|---------------|
| C | -0.2219128604 | -0.5374743724 | 2.08675713    |
| H | 0.1489653338  | 0.0265819762  | 1.2275358343  |
| H | 0.1114361376  | -0.0110888257 | 2.9823476854  |
| C | 2.5171668233  | -3.2781966248 | 1.8011087065  |
| H | -1.3068498229 | -0.5855300069 | 2.0521517347  |
| C | 0.3707892369  | -1.916406198  | 2.0428710178  |
| O | -0.2961859365 | -2.8962252154 | 1.7967838409  |
| C | 1.8488804591  | -2.028843246  | 2.3525669744  |
| H | 1.9274435085  | -1.9958412396 | 3.4467132161  |
| H | 2.3648657697  | -1.1335993063 | 1.9907632132  |
| O | 1.3733486497  | -5.5137962037 | 3.0124132951  |
| O | 0.348403593   | -5.8154405799 | 5.1593072746  |
| S | 0.3885313236  | -4.8081454054 | 4.0818771391  |
| H | 1.8611370688  | -4.1504455218 | 2.0670895234  |
| C | 2.592810929   | -3.2613253727 | 0.2812790766  |
| H | 3.2331184913  | -2.4356725445 | -0.0428791852 |
| H | 3.0220955218  | -4.189178192  | -0.0968584366 |
| H | 1.6080316474  | -3.1295175008 | -0.1668764404 |
| C | 3.8697225858  | -3.5241533959 | 2.4461891544  |
| H | 4.3204444358  | -4.441016238  | 2.0655133235  |
| H | 4.5475059107  | -2.6954838836 | 2.2236479302  |
| H | 3.781412194   | -3.6077361029 | 3.5305789919  |

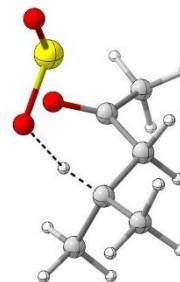

### <sup>3</sup>TSc-b

E(UM062X) = -859.586959341

E(UωB97XD) = -859.715474466

Charge = 0    Multiplicity = 3

|   |               |               |               |
|---|---------------|---------------|---------------|
| C | -0.0814871975 | -0.9768197543 | 1.8782301872  |
| H | 0.2284809141  | -0.2186184342 | 1.1551830878  |
| H | 0.1815125133  | -0.6040429716 | 2.8687280643  |
| C | 2.9389303093  | -3.4129986744 | 1.3611559736  |
| H | -1.154247962  | -1.1326254872 | 1.8009003655  |
| C | 0.6581768198  | -2.2530870871 | 1.5783476534  |
| O | 0.1036075867  | -3.2089482486 | 1.0870664024  |
| C | 2.1276091128  | -2.2674582297 | 1.94195623    |
| H | 2.1631181333  | -2.2883969089 | 3.0377838586  |
| H | 2.5648336127  | -1.3051043792 | 1.6523960516  |
| O | 1.358451102   | -5.1157178491 | 2.9525236086  |
| O | 0.9868235848  | -6.2877739894 | 0.7354119278  |
| S | 0.4686210161  | -6.1278067744 | 2.1019229329  |
| H | 2.3965975517  | -4.3546731838 | 1.5972639582  |
| C | 3.0436947495  | -3.3323257343 | -0.1558972769 |
| H | 3.5825133752  | -2.422825925  | -0.4385620571 |
| H | 3.5935421113  | -4.1866358153 | -0.5516805842 |
| H | 2.0594130357  | -3.3110129273 | -0.6217611076 |
| C | 4.3072699231  | -3.5016236847 | 2.0210903932  |
| H | 4.8801665108  | -4.3374843307 | 1.6183715091  |
| H | 4.8735292743  | -2.5845856692 | 1.835873689   |
| H | 4.2186481901  | -3.6319269823 | 3.1007129628  |

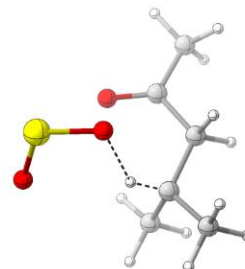

**<sup>3</sup>TS<sub>c-c</sub>**

E(UM062X) = -859.587179437

E(UωB97XD) = -859.714223146

Charge = 0    Multiplicity = 3

|   |               |               |               |
|---|---------------|---------------|---------------|
| C | -0.2213877587 | -0.5643552705 | 2.1366544561  |
| H | 0.0830010881  | -0.033413306  | 1.2314395461  |
| H | 0.1499588254  | 0.0119022282  | 2.9853176123  |
| C | 2.564616212   | -3.2568907546 | 1.8252029847  |
| H | -1.3048466025 | -0.6396355158 | 2.169509777   |
| C | 0.4034651875  | -1.9297020815 | 2.1210365644  |
| O | -0.25147247   | -2.9350858773 | 1.9606278841  |
| C | 1.8995940249  | -1.9931167371 | 2.3467230639  |
| H | 2.042306746   | -1.8972522291 | 3.4306357945  |
| H | 2.3708097464  | -1.1085770669 | 1.9058955539  |
| O | 1.5438889351  | -5.4506515326 | 3.2085192229  |
| O | 0.6485116347  | -5.6628779592 | 5.422813004   |
| S | 0.5949534447  | -4.7171104156 | 4.2915781493  |
| H | 1.9430242263  | -4.1257997708 | 2.172449537   |
| C | 2.5575750556  | -3.3202307805 | 0.3048006914  |
| H | 3.1652290916  | -2.5040628973 | -0.0969535686 |
| H | 2.9816832433  | -4.2606891309 | -0.0471435481 |
| H | 1.5478686096  | -3.2264574789 | -0.0948129445 |
| C | 3.9547421652  | -3.4426384261 | 2.4072258291  |
| H | 4.405584692   | -4.3681936055 | 2.0483603645  |
| H | 4.6004168415  | -2.6125637158 | 2.107742153   |
| H | 3.9256060615  | -3.4732486763 | 3.4975818728  |

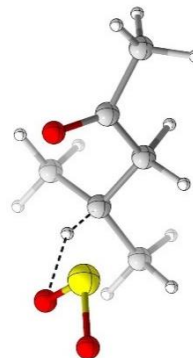



## S2

E(UM062X) = -310.398001383

E(UωB97XD) = -310.473376626

Charge = 0    Multiplicity = 2

|   |               |               |              |
|---|---------------|---------------|--------------|
| H | -1.3502748498 | -0.4005686287 | 0.5379881202 |
| C | -0.3280053746 | -0.3926470387 | 0.9069291141 |
| H | 0.2490221458  | 0.395188064   | 0.4213956294 |
| H | -0.329367476  | -0.1772037457 | 1.9781298616 |
| C | 2.4024604276  | -3.1894758675 | 1.0109377796 |
| C | 0.3209492146  | -1.7336716291 | 0.6912614021 |
| O | -0.3213482444 | -2.7091070359 | 0.3770292853 |
| C | 1.8216630015  | -1.7832271185 | 0.876064287  |
| H | 2.0938417468  | -1.166405226  | 1.7386165658 |
| H | 2.2459538269  | -1.2728946458 | 0.0030897124 |
| C | 3.8846348643  | -3.1599607654 | 0.8784417362 |
| H | 4.4885107933  | -3.9262868061 | 1.3446413484 |
| H | 4.3608287801  | -2.5019215039 | 0.1640889949 |
| C | 1.9771057642  | -3.8403197294 | 2.3272875477 |
| H | 2.3552062132  | -3.2603982902 | 3.1726500957 |
| H | 0.8916653555  | -3.8989439419 | 2.4023354957 |
| H | 2.379733516   | -4.8510198843 | 2.4045714543 |
| H | 1.9789792999  | -3.7871544987 | 0.190733656  |

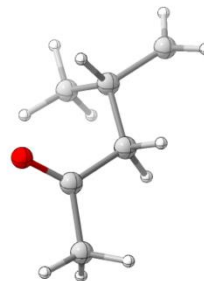

## S4

E(UM062X) = -310.407161237

E(UωB97XD) = -310.484638056

Charge = 0    Multiplicity = 2

|   |               |               |              |
|---|---------------|---------------|--------------|
| H | -1.97532302   | -0.6339739954 | 3.0743317027 |
| C | -1.0032933115 | -0.4830769601 | 3.5371382953 |

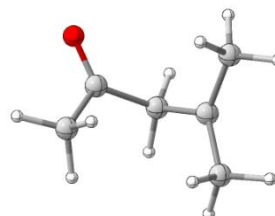

[Go back to table of contents](#)

|   |               |               |              |
|---|---------------|---------------|--------------|
| H | -0.7654517975 | 0.5841347577  | 3.5121202027 |
| H | -1.0204938755 | -0.788827874  | 4.5829635839 |
| C | 2.0303603043  | -0.1629374475 | 3.8309943409 |
| C | 0.0584598068  | -1.2245157727 | 2.7658288571 |
| O | -0.1079701374 | -1.5542912436 | 1.6141754503 |
| C | 1.3806066123  | -1.4662265853 | 3.4824245222 |
| H | 2.0076247312  | -2.0527979231 | 2.8076292402 |
| H | 1.1820169452  | -2.0473079926 | 4.3866461784 |
| C | 2.5022395718  | 0.7022004542  | 2.7125362275 |
| H | 3.3099258949  | 1.361311458   | 3.037827197  |
| H | 2.8528570108  | 0.109490485   | 1.8658850966 |
| C | 1.8268785125  | 0.4537051344  | 5.1714401235 |
| H | 0.9684329353  | 1.1411545892  | 5.1825099876 |
| H | 1.6485207066  | -0.2987867288 | 5.9407255822 |
| H | 2.6968600885  | 1.0485825448  | 5.4613820333 |
| H | 1.6991147947  | 1.354065541   | 2.3371556788 |

## SO<sub>2</sub>H

E(UM062X) = -549.208293933

E(UωB97XD) = -549.260754474

Charge = 0    Multiplicity = 2

|   |               |              |               |
|---|---------------|--------------|---------------|
| S | -1.9066686725 | 1.09953378   | -0.0208331338 |
| O | -3.0009090055 | 0.217651626  | -0.4247251459 |
| O | -2.5326288925 | 2.0006684899 | 1.1761100303  |
| H | -1.8639785694 | 2.6204351441 | 1.5063950595  |

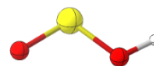

### S3

E(RM062X) = -859.710203072

E(R $\omega$ B97XD) = -859.830949804

Charge = 0    Multiplicity = 1

|   |               |               |               |
|---|---------------|---------------|---------------|
| H | 3.387136489   | -1.2199564639 | -0.5574447888 |
| C | 2.4682764405  | -1.7103817983 | -0.2366743277 |
| H | 1.9559872341  | -2.0754059821 | -1.1309766133 |
| H | 2.6828004779  | -2.5461775151 | 0.4237114157  |
| C | 0.3023460685  | 1.5195253632  | 0.26001116    |
| H | 0.102757701   | 1.3096133893  | 1.3136477393  |
| C | 1.5378313522  | -0.7403954919 | 0.4212767935  |
| O | 0.9108395334  | -1.0424743385 | 1.4191801781  |
| C | 1.4582899526  | 0.6320344496  | -0.198585691  |
| H | 1.481605448   | 0.5268102394  | -1.2860223553 |
| H | 2.4096631125  | 1.1059706786  | 0.0745309262  |
| C | 0.6938792013  | 2.9935838843  | 0.1395068654  |
| H | 0.9445946953  | 3.2407245994  | -0.8944543068 |
| H | -0.1215958287 | 3.6438528942  | 0.4567740752  |
| C | -0.9863892489 | 1.3083414248  | -0.5346585125 |
| H | -1.7776465708 | 1.9580233628  | -0.1545846181 |
| H | -0.8371810965 | 1.5419252319  | -1.5925634964 |
| H | 1.564169437   | 3.2079515582  | 0.7605131113  |
| S | -1.7181056174 | -0.3418909974 | -0.5546775852 |
| O | -1.7371510629 | -0.6393334721 | 1.0269512781  |
| H | -0.8119805017 | -0.7005583183 | 1.3665778098  |
| O | -0.7102590877 | -1.2182490951 | -1.1891878154 |

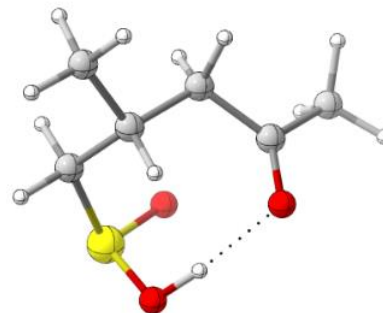

## S5

E(RM062X) = -859.704803609

E(RωB97XD) = -859.824365703

Charge = 0    Multiplicity = 1

|   |               |               |              |
|---|---------------|---------------|--------------|
| H | -1.1689508085 | -0.0240377777 | 5.2900024609 |
| C | -0.5447112236 | -0.0933010963 | 4.4033408266 |
| H | -1.1780933338 | -0.1133356469 | 3.5134923065 |
| H | 0.1009502043  | 0.7813463335  | 4.3207553636 |
| C | 2.0890230061  | -2.7836351315 | 3.2784376812 |
| C | 0.271839973   | -1.3576176928 | 4.4412848187 |
| O | 0.0518887259  | -2.2349377225 | 5.2415834799 |
| C | 1.3799247521  | -1.4378954389 | 3.407687384  |
| H | 2.0981298366  | -0.6535788366 | 3.6696107992 |
| H | 0.9502680822  | -1.1335416622 | 2.4465501696 |
| C | 2.8750951479  | -3.1844406357 | 4.5183001996 |
| H | 3.5678476307  | -3.9935198178 | 4.2805174939 |
| H | 3.4296113746  | -2.3425791848 | 4.9376044078 |
| C | 1.1419358897  | -3.8941679854 | 2.8266001849 |
| H | 0.3748556081  | -4.0416332677 | 3.5845315034 |
| H | 0.6530419753  | -3.6397707793 | 1.8829470763 |
| H | 1.6889799409  | -4.8270744947 | 2.6941774551 |
| H | 2.1842299557  | -3.5342375554 | 5.2826605901 |
| S | 3.2546051765  | -2.5885240512 | 1.8601403498 |
| O | 4.2528813348  | -1.4699299257 | 2.4818009185 |
| H | 4.7445169423  | -1.8418972946 | 3.2339070134 |
| O | 4.0020920179  | -3.8531265335 | 1.7870220553 |

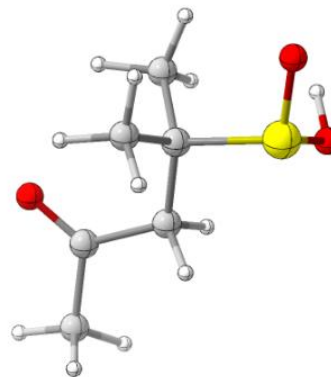

6.2 -  $\omega$ B97XD / def2-QZVPP / PCM (HFIP) // M06-2X (D3) / def2-TZVP / PCM (HFIP)

S6-a

E(RM062X) = -1100.98806038

E(R $\omega$ B97XD) = -1101.15258574

Charge = 0    Multiplicity = 1

|   |              |               |              |
|---|--------------|---------------|--------------|
| C | 1.4022435024 | -4.0473865469 | 3.9219868533 |
| H | 1.2149637062 | -4.543762916  | 2.9696840054 |
| H | 0.4456034553 | -3.6515358693 | 4.2719120285 |
| C | 2.340786324  | -2.8933819689 | 3.7336710159 |
| C | 2.1024327559 | -2.0078655983 | 2.5414852667 |
| H | 1.0222197121 | -1.8756508987 | 2.4179740281 |
| H | 2.4223113842 | -2.6006815613 | 1.6749482544 |
| H | 3.8727536813 | -0.8531851115 | 2.7990615948 |
| H | 1.7869432318 | -4.754088444  | 4.6536515952 |
| C | 2.8206503967 | -0.6640896596 | 2.5721259736 |
| C | 2.7258952876 | 0.0090016883  | 1.2067160039 |
| H | 1.6809778515 | 0.1895337929  | 0.9412845121 |
| H | 3.2402312706 | 0.9709089526  | 1.2134487005 |
| H | 3.1703544738 | -0.6098783482 | 0.4255526651 |
| C | 2.2429976589 | 0.2374360827  | 3.6596390636 |
| H | 2.7749476622 | 1.1891389568  | 3.6947546012 |
| H | 1.1903084595 | 0.4491913247  | 3.4536455241 |
| H | 2.3130824626 | -0.225662056  | 4.6441059157 |
| O | 3.2635517971 | -2.6856684065 | 4.5021067244 |
| H | 3.5827433244 | -3.6966612354 | 5.8239572101 |
| O | 3.8745968117 | -4.3994033097 | 6.4499990678 |
| C | 4.8025840815 | -5.191446771  | 5.7963031046 |
| H | 4.7734246317 | -5.0789894882 | 4.7072042016 |
| C | 4.4693433276 | -6.6510566885 | 6.0995200267 |

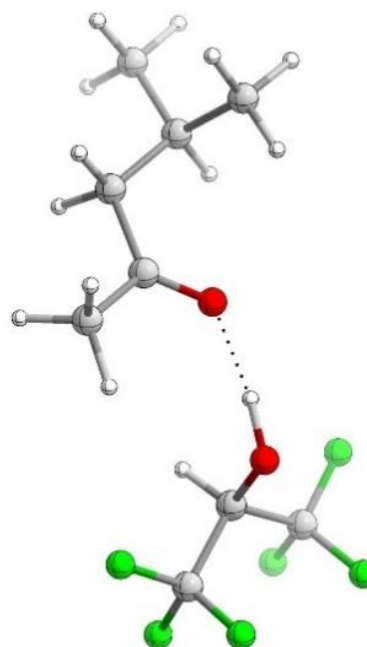

|   |              |               |              |
|---|--------------|---------------|--------------|
| C | 6.2157017015 | -4.8002830379 | 6.2371701782 |
| F | 5.3573302066 | -7.4901134008 | 5.5632006699 |
| F | 3.2727705793 | -6.9489846039 | 5.5884012508 |
| F | 4.4176543885 | -6.8939913715 | 7.4081123322 |
| F | 6.4079153376 | -3.5034444271 | 5.9895764954 |
| F | 6.4120692916 | -4.994772279  | 7.5412162138 |
| F | 7.1556457384 | -5.4799150667 | 5.576962273  |

### S6-b

E(RM062X) = -1100.98840856

E(RωB97XD) = -1101.15284996

Charge = 0    Multiplicity = 1

|   |              |               |              |
|---|--------------|---------------|--------------|
| C | 1.7352761216 | -4.3087303622 | 3.5795807054 |
| H | 2.3357209222 | -4.8623740038 | 2.8526091385 |
| H | 0.7208727639 | -4.2595115744 | 3.1841275143 |
| C | 2.3166078156 | -2.932332566  | 3.7088995182 |
| C | 2.0544234655 | -1.9698595604 | 2.5839153473 |
| H | 0.9996392354 | -1.6848872674 | 2.6877962794 |
| H | 2.1136913228 | -2.5187015087 | 1.6378519758 |
| H | 2.9217861712 | -0.2855453718 | 3.5555936725 |
| H | 1.7476737236 | -4.832731839  | 4.5329073114 |
| C | 2.9493157271 | -0.7364258965 | 2.5606348993 |
| C | 4.3923974839 | -1.1150171225 | 2.2385013683 |
| H | 4.4507759378 | -1.5673828233 | 1.2448499981 |
| H | 5.0324958148 | -0.2317399741 | 2.2419859057 |
| H | 4.7929577142 | -1.8248005003 | 2.9629221234 |
| C | 2.4180829673 | 0.2735788366  | 1.5486873787 |
| H | 3.045937633  | 1.1652844164  | 1.5266416758 |
| H | 2.413125534  | -0.1579381845 | 0.5443253713 |

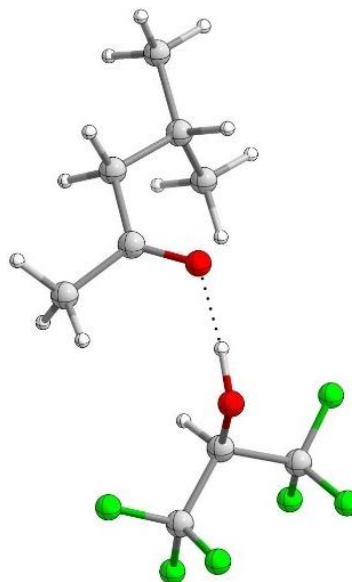

|   |              |               |              |
|---|--------------|---------------|--------------|
| H | 1.3988505499 | 0.5800564287  | 1.7894208334 |
| O | 2.9691133339 | -2.6037691552 | 4.6842359291 |
| H | 3.2897665958 | -3.6792392923 | 5.9496945754 |
| O | 3.589675338  | -4.3993956822 | 6.552529871  |
| C | 4.6059833891 | -5.0926446476 | 5.9193470847 |
| H | 4.5832118965 | -4.9956942753 | 4.8280308742 |
| C | 4.420153266  | -6.5756403173 | 6.2336398021 |
| C | 5.9661026277 | -4.5545271923 | 6.3733454776 |
| F | 5.4107760163 | -7.3198575835 | 5.7385387319 |
| F | 3.2802096559 | -7.0063604201 | 5.6897507922 |
| F | 4.3523115088 | -6.8067947019 | 7.5434027711 |
| F | 6.0191642912 | -3.2432345624 | 6.1313581199 |
| F | 6.1725826703 | -4.7325351112 | 7.6780106156 |
| F | 6.9780225066 | -5.1259131859 | 5.7174563385 |

### S6-c

E(RM062X) = -1100.98842086

E(RωB97XD) = -1101.15280824

Charge = 0    Multiplicity = 1

|   |              |               |              |
|---|--------------|---------------|--------------|
| C | 1.7023316565 | -4.0537142824 | 4.1042531329 |
| H | 2.1145432848 | -4.7423079889 | 3.3614082524 |
| H | 0.6274762146 | -4.0036763179 | 3.9309514506 |
| C | 2.3331415244 | -2.709599327  | 3.8915977415 |
| C | 1.8520473774 | -1.9047359396 | 2.716316744  |
| H | 0.8611062716 | -1.533564133  | 3.0076104353 |
| H | 1.6710131331 | -2.5869990556 | 1.8788547924 |
| H | 2.9777102661 | -0.1604511646 | 3.191516293  |
| H | 1.9097329309 | -4.4324116784 | 5.1027478062 |
| C | 2.7611438765 | -0.7543154288 | 2.3002285596 |

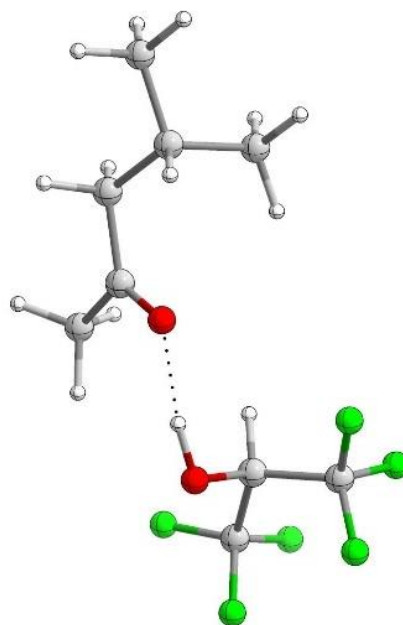

|   |              |               |              |
|---|--------------|---------------|--------------|
| C | 4.0779003369 | -1.2783793743 | 1.7334337064 |
| H | 3.891340652  | -1.8778701827 | 0.838293837  |
| H | 4.73268869   | -0.452460977  | 1.4524336195 |
| H | 4.6084456373 | -1.8981602807 | 2.4570490388 |
| C | 2.0491710797 | 0.1301738903  | 1.2819270722 |
| H | 2.6868979955 | 0.9618450169  | 0.979523329  |
| H | 1.7990545711 | -0.4437310131 | 0.3858662727 |
| H | 1.1236859515 | 0.5405408806  | 1.6891025247 |
| O | 3.1948757784 | -2.2836351533 | 4.640538738  |
| H | 3.7712552317 | -3.1949550669 | 5.9523141664 |
| O | 4.1908861323 | -3.8561316819 | 6.5503781171 |
| C | 4.9980239006 | -4.6723367098 | 5.7776623372 |
| H | 4.708799652  | -4.6901590353 | 4.7207740507 |
| C | 4.8494427513 | -6.0999950463 | 6.2995949567 |
| C | 6.4441752741 | -4.1700659468 | 5.8234188243 |
| F | 5.6664831066 | -6.949065988  | 5.6736469203 |
| F | 3.5987113608 | -6.5194940554 | 6.0976123402 |
| F | 5.0953819743 | -6.185321075  | 7.6055072588 |
| F | 6.4765427761 | -2.8959052736 | 5.4284959548 |
| F | 6.9616870294 | -4.2252228712 | 7.0505171895 |
| F | 7.2436445824 | -4.8636787403 | 5.0108465376 |

### S6-d

E(RM062X) = -1100.98805142

E(RωB97XD) = -1101.15255607

Charge = 0    Multiplicity = 1

|   |              |               |              |
|---|--------------|---------------|--------------|
| C | 1.432164019  | -3.7751406021 | 4.4594575874 |
| H | 0.9863406603 | -4.386736983  | 3.6749292591 |
| H | 0.6131502105 | -3.273675582  | 4.9809551532 |

[Go back to table of contents](#)



|   |              |               |              |
|---|--------------|---------------|--------------|
| C | 2.3153510118 | -2.7218344764 | 3.8609199621 |
| C | 1.788192921  | -1.9920340237 | 2.6559673925 |
| H | 0.7180318626 | -1.809832144  | 2.8009407752 |
| H | 1.8500508405 | -2.7149530843 | 1.8324242237 |
| H | 3.5908674592 | -0.9277274128 | 2.2667363084 |
| H | 1.9799441571 | -4.3956294184 | 5.1651337186 |
| C | 2.5217662728 | -0.7041766727 | 2.3010145951 |
| C | 2.0783212308 | -0.2133514176 | 0.9266351331 |
| H | 1.0054650759 | -0.0036915516 | 0.9233143706 |
| H | 2.5996436901 | 0.7063876497  | 0.6579236344 |
| H | 2.2792612282 | -0.9571961954 | 0.1539270821 |
| C | 2.2832674341 | 0.368641988   | 3.3599870399 |
| H | 2.8264368965 | 1.2817844686  | 3.1127937064 |
| H | 1.2194667086 | 0.6154018533  | 3.4135011396 |
| H | 2.6087849216 | 0.0383658151  | 4.3466379679 |
| O | 3.4167296156 | -2.4728933549 | 4.3192300273 |
| H | 4.0476602357 | -3.2968909523 | 5.6525724239 |
| O | 4.4729836018 | -3.9080862211 | 6.2985977223 |
| C | 5.1871901136 | -4.8544613814 | 5.5848194917 |
| H | 4.8580229973 | -4.9492236941 | 4.544203502  |
| C | 4.9541248574 | -6.2102876998 | 6.2484949425 |
| C | 6.6665921161 | -4.46152749   | 5.5401679018 |
| F | 5.6726849726 | -7.1785891256 | 5.6772146627 |
| F | 3.6665606584 | -6.5438770116 | 6.1382038274 |
| F | 5.2536946491 | -6.1923977902 | 7.5461668901 |
| F | 6.7790863105 | -3.2424944589 | 5.0094655971 |
| F | 7.2190431872 | -4.425508775  | 6.7528244466 |
| F | 7.3867890839 | -5.2961682558 | 4.7880455155 |

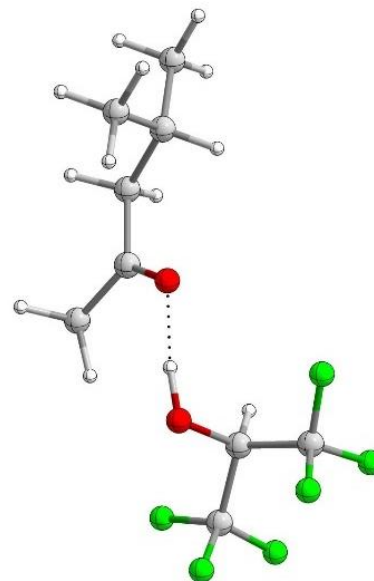

## S6-e

E(RM062X) = -1100.98790019

E(RωB97XD) = -1101.15210131

Charge = 0    Multiplicity = 1

|   |               |               |               |
|---|---------------|---------------|---------------|
| C | -0.0466026833 | 0.6694207142  | -0.4352886753 |
| H | 1.0056097267  | 0.5488016321  | -0.6769056703 |
| H | -0.3758769537 | 1.6653872829  | -0.740417439  |
| C | -0.2584469186 | 0.5140449266  | 1.04162788    |
| C | -1.6709457777 | 0.365473026   | 1.5416037356  |
| H | -1.991107499  | -0.6425552961 | 1.2534033754  |
| H | -1.6647654391 | 0.4102093564  | 2.6332269156  |
| H | -2.64902661   | 1.3124339932  | -0.1183243994 |
| H | -0.6541225307 | -0.0511858409 | -0.983929083  |
| C | -2.6601995016 | 1.3898314715  | 0.9725358777  |
| C | -4.0689380624 | 1.0659606568  | 1.4581475379  |
| H | -4.1131776885 | 1.1129043821  | 2.5492356271  |
| H | -4.7884942577 | 1.7831823329  | 1.0612345698  |
| H | -4.3757743677 | 0.0658159446  | 1.1489236443  |
| C | -2.266365035  | 2.8082570105  | 1.372827018   |
| H | -2.9421213581 | 3.5374131914  | 0.9244397325  |
| H | -2.3184425232 | 2.9194210766  | 2.4581175144  |
| H | -1.2487790067 | 3.0581553766  | 1.0633899863  |
| O | 0.6936356713  | 0.4892920403  | 1.8014239904  |
| H | 0.5017736184  | 0.1974720835  | 3.4745469934  |
| O | 0.3222719533  | -0.086038074  | 4.4048619646  |
| C | 0.5847602019  | 0.9272003213  | 5.306642616   |
| H | 0.3294433342  | 0.5847877363  | 6.3118402224  |
| C | -0.2890841839 | 2.1527360645  | 5.0251218279  |
| C | 2.0798587317  | 1.2600628378  | 5.3189938697  |

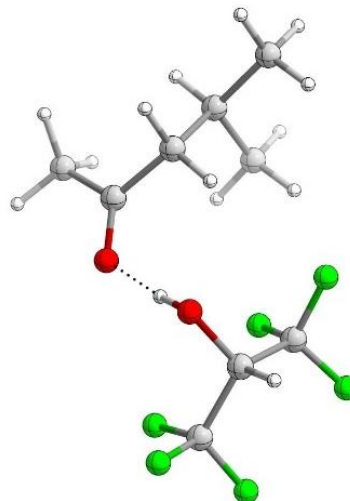

|   |               |              |              |
|---|---------------|--------------|--------------|
| F | -0.1519930023 | 3.0984744637 | 5.9533182626 |
| F | -1.5734603495 | 1.7913994581 | 5.0037106855 |
| F | -0.0097698978 | 2.6993376272 | 3.8379672879 |
| F | 2.5152469284  | 1.6206344846 | 4.1097477666 |
| F | 2.3768651026  | 2.2426072549 | 6.1703102336 |
| F | 2.7726923778  | 0.1824954645 | 5.6877381317 |

### S6-f

E(RM062X) = -1100.98817168

E(RωB97XD) = -1101.1519137

Charge = 0    Multiplicity = 1

|   |               |               |               |
|---|---------------|---------------|---------------|
| C | -0.3456295627 | 1.4031107072  | -0.336877206  |
| H | 0.6878551052  | 1.7339285911  | -0.407699396  |
| H | -0.9966763068 | 2.1961298037  | -0.7143825475 |
| C | -0.7177737223 | 1.1179120667  | 1.0895316978  |
| C | -1.978380187  | 0.3398645894  | 1.3406075577  |
| H | -1.8578713548 | -0.6472497699 | 0.8839258247  |
| H | -2.0945802412 | 0.2124503347  | 2.4182770683  |
| H | -3.0924248131 | 1.1042845814  | -0.3305835594 |
| H | -0.5110735647 | 0.5242923806  | -0.9597249793 |
| C | -3.2244053236 | 1.0213076193  | 0.7521606745  |
| C | -4.4532021446 | 0.1594139235  | 1.0183176063  |
| H | -4.6136299679 | 0.0489715928  | 2.093473721   |
| H | -5.3453775559 | 0.617912213   | 0.5899005938  |
| H | -4.3395401788 | -0.8365876389 | 0.5880308171  |
| C | -3.4013055105 | 2.4197500228  | 1.3357155029  |
| H | -4.2912836169 | 2.8990774393  | 0.9265477946  |
| H | -3.5141700403 | 2.3640420123  | 2.4213904671  |
| H | -2.5461418326 | 3.0650347109  | 1.1229117554  |

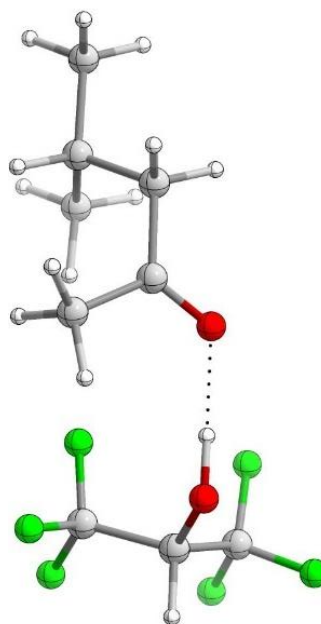

|   |               |              |               |
|---|---------------|--------------|---------------|
| O | -0.0363787877 | 1.5181346765 | 2.0170877818  |
| H | 1.3498674623  | 2.4739183242 | 1.747397554   |
| O | 2.1942746616  | 2.9437734734 | 1.5353537314  |
| C | 2.0521086238  | 4.3153264009 | 1.6226998756  |
| H | 3.0043796436  | 4.7884449892 | 1.3730793524  |
| C | 1.714758779   | 4.7336030677 | 3.0570020777  |
| C | 1.0305280876  | 4.8274610955 | 0.6028983047  |
| F | 1.5805090341  | 6.0541358617 | 3.1840628977  |
| F | 2.6928008006  | 4.346090529  | 3.8754954963  |
| F | 0.5856186241  | 4.1642800566 | 3.4850227369  |
| F | -0.1951331737 | 4.3450677979 | 0.8412321144  |
| F | 0.9476600463  | 6.156632818  | 0.5884702501  |
| F | 1.3812700168  | 4.4307107295 | -0.6203265659 |

### S6-g

E(RM062X) = -1100.98556213

E(RωB97XD) = -1101.14980441

Charge = 0    Multiplicity = 1

|   |              |               |              |
|---|--------------|---------------|--------------|
| C | 1.4655000378 | -4.0239288162 | 4.263765223  |
| H | 1.2443491899 | -4.6556358019 | 3.4037277942 |
| H | 0.5101237665 | -3.6786433239 | 4.6656500613 |
| C | 2.2628182401 | -2.8214729053 | 3.8453696936 |
| C | 1.7907809959 | -2.105279223  | 2.6089275396 |
| H | 0.7111065957 | -1.9614040042 | 2.7248956059 |
| H | 1.8920820204 | -2.8283938011 | 1.790848376  |
| H | 1.9525193772 | -0.4381017975 | 1.3442662874 |
| H | 1.9889122116 | -4.591927032  | 5.0298774559 |
| C | 2.4731242974 | -0.7879461381 | 2.2406991793 |
| C | 2.2922496498 | 0.2786133265  | 3.3187474322 |

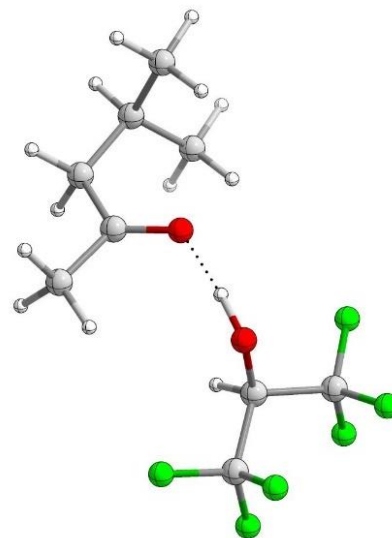

|   |              |               |              |
|---|--------------|---------------|--------------|
| H | 2.8304494592 | 0.0107182893  | 4.227801647  |
| H | 2.6761251573 | 1.2379579516  | 2.9685438917 |
| H | 1.2376778393 | 0.4097454105  | 3.569353869  |
| C | 3.9435554421 | -0.97067394   | 1.8690137184 |
| H | 4.3524968993 | -0.0351753792 | 1.4840211472 |
| H | 4.5333798658 | -1.2676906549 | 2.7355739278 |
| H | 4.0613156031 | -1.7319271755 | 1.0951997066 |
| O | 3.2324995822 | -2.4530709961 | 4.4844253686 |
| H | 3.8231324156 | -3.2914590226 | 5.8340777221 |
| O | 4.2598252305 | -3.9096710847 | 6.4651130869 |
| C | 5.0737391726 | -4.7564581886 | 5.733340975  |
| H | 4.7689257815 | -4.8494467975 | 4.6848060121 |
| C | 4.9651119702 | -6.1492116301 | 6.3501523869 |
| C | 6.5089578276 | -4.2218015951 | 5.723630398  |
| F | 5.7881739211 | -7.0210275299 | 5.7646013526 |
| F | 3.7199356159 | -6.6057627164 | 6.2011932994 |
| F | 5.2367839064 | -6.1443459574 | 7.6537955623 |
| F | 6.5075263733 | -2.9750126791 | 5.2479380309 |
| F | 7.0462167623 | -4.1874773656 | 6.9431250589 |
| F | 7.3113517923 | -4.9490694219 | 4.9439141902 |

### S6-h

E(RM062X) = -1100.98556213

E(RωB97XD) = -1101.14922962

Charge = 0    Multiplicity = 1

|   |               |               |               |
|---|---------------|---------------|---------------|
| C | 0.1162024297  | 0.6241931524  | 0.2145923798  |
| H | 0.6798084805  | -0.2351871096 | -0.1492162868 |
| H | -0.8550360573 | 0.2543759779  | 0.5520120223  |
| C | -0.1138322313 | 1.6065394148  | -0.8981208391 |

[Go back to table of contents](#)

|   |               |              |               |
|---|---------------|--------------|---------------|
| C | -0.5501417741 | 1.0271514758 | -2.2177685893 |
| H | -1.2709518506 | 0.2345591736 | -1.993727683  |
| H | 0.3297972474  | 0.5077299644 | -2.6171249357 |
| H | -1.4473299905 | 1.3545691381 | -4.0887443728 |
| H | 0.6322529382  | 1.0932954849 | 1.0489729596  |
| C | -1.1215379713 | 1.9898552225 | -3.2597362    |
| C | -2.3521218231 | 2.7287002304 | -2.7370445538 |
| H | -2.0820376028 | 3.4191889321 | -1.9375377048 |
| H | -2.8171606569 | 3.3047648609 | -3.538402777  |
| H | -3.0962383472 | 2.0294489585 | -2.3498181164 |
| C | -0.0769829831 | 2.9575529705 | -3.8121032215 |
| H | -0.4975833694 | 3.5311405319 | -4.6397733987 |
| H | 0.2519625684  | 3.6572177438 | -3.0449626062 |
| H | 0.797133019   | 2.4205016909 | -4.1857168587 |
| O | 0.0436399944  | 2.8020653349 | -0.7310488459 |
| H | 0.2637197605  | 3.4506963592 | 0.826178592   |
| O | 0.4328568034  | 3.7750353844 | 1.7452289112  |
| C | -0.7319428543 | 4.1953870362 | 2.3580841224  |
| H | -0.4996663604 | 4.5282225477 | 3.3721539535  |
| C | -1.733248659  | 3.0442291581 | 2.4982354711  |
| C | -1.3226533972 | 5.4020918681 | 1.6223926929  |
| F | -2.7979371882 | 3.3864293766 | 3.2223819286  |
| F | -1.1471970053 | 2.0118027011 | 3.1041793412  |
| F | -2.1708460855 | 2.61254343   | 1.3096384636  |
| F | -1.558292242  | 5.1298662715 | 0.3370011225  |
| F | -2.4655306025 | 5.8218075687 | 2.1666439119  |
| F | -0.4581881895 | 6.4160921496 | 1.6634911171  |

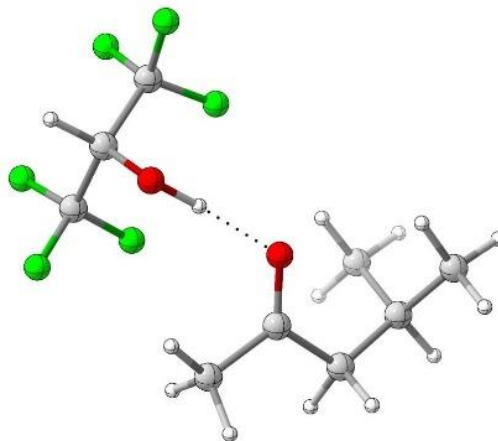

### $^3\text{SO}_2$

E(UM062X) = -548.516044583

E(U $\omega$ B97XD) = -548.568531341

Charge = 0    Multiplicity = 3

|   |               |              |               |
|---|---------------|--------------|---------------|
| S | -1.7773873613 | 0.5024966893 | 0.1503940659  |
| O | -3.2523276661 | 0.4294965398 | -0.0061792745 |
| O | -1.0681092926 | 0.8367351609 | 1.4115056786  |

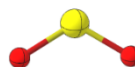

### $^3\text{TS}_{\text{D-a}}$

E(UM062X) = -1649.50355349

E(U $\omega$ B97XD) = -1649.71817066

Charge = 0    Multiplicity = 3

|   |           |           |           |
|---|-----------|-----------|-----------|
| C | 0.723908  | 2.163298  | -1.180475 |
| H | 1.168852  | 2.658354  | -2.046925 |
| H | 1.093933  | 2.676965  | -0.292519 |
| C | 3.133627  | -0.909958 | -1.183727 |
| C | 1.176687  | 0.734802  | -1.178029 |
| C | 2.618383  | 0.479211  | -0.831505 |
| H | 2.683778  | 0.652715  | 0.250589  |
| H | 3.237088  | 1.259615  | -1.285613 |
| C | 4.514195  | -1.128527 | -0.589732 |
| H | 4.889625  | -2.135357 | -0.776507 |
| H | 5.235036  | -0.395628 | -0.954562 |
| O | 4.289753  | -0.514528 | 2.195786  |
| O | 5.212536  | 1.584541  | 1.088198  |
| S | 4.810119  | 0.970108  | 2.363572  |
| H | -0.359238 | 2.233822  | -1.237    |
| C | 3.191408  | -1.107583 | -2.700185 |
| H | 3.876614  | -0.384672 | -3.149317 |

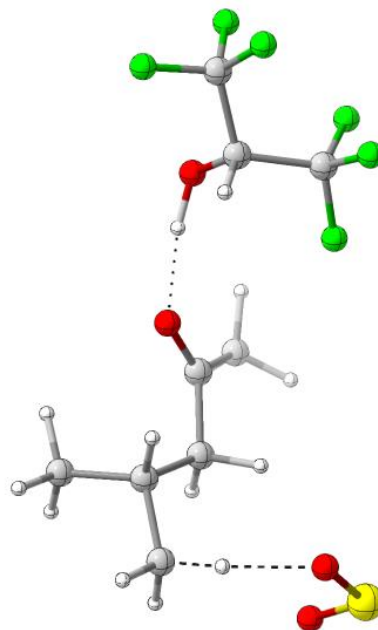

[Go back to table of contents](#)

|   |           |           |           |
|---|-----------|-----------|-----------|
| H | 3.547334  | -2.10854  | -2.945584 |
| H | 2.206733  | -0.976486 | -3.148721 |
| H | 2.444403  | -1.645296 | -0.762711 |
| O | 0.416055  | -0.182786 | -1.429888 |
| O | -2.22908  | 0.146632  | -1.441643 |
| C | -2.556777 | -0.557365 | -0.29563  |
| H | -1.849744 | -1.361408 | -0.06595  |
| C | -3.915109 | -1.213878 | -0.531745 |
| C | -2.558001 | 0.383061  | 0.91348   |
| F | -4.841446 | -0.330824 | -0.901966 |
| F | -4.362006 | -1.840034 | 0.558973  |
| F | -3.812004 | -2.119725 | -1.50448  |
| F | -3.478047 | 1.341941  | 0.812438  |
| F | -2.767556 | -0.266327 | 2.059294  |
| F | -1.365049 | 0.979774  | 1.003048  |
| H | -1.254334 | 0.080991  | -1.568807 |
| H | 4.475681  | -1.016961 | 0.521707  |

### <sup>3</sup>T<sub>D</sub>-b

E(UM062X) = -1649.50320363

E(UωB97XD) = -1649.71828798

Charge = 0    Multiplicity = 3

|   |               |               |               |
|---|---------------|---------------|---------------|
| C | 0.3795310499  | -0.7100150671 | -2.9026111945 |
| H | 0.5090211312  | -0.2211995654 | -3.871504576  |
| H | 1.3666686473  | -0.785213127  | -2.4465517422 |
| C | 0.0807567557  | -4.3613169315 | -4.2581901229 |
| C | -0.1895724369 | -2.0750189249 | -3.1454711483 |
| C | 0.7492616644  | -3.1166585746 | -3.6898190505 |
| H | 1.4001171437  | -3.3787559602 | -2.8453833829 |

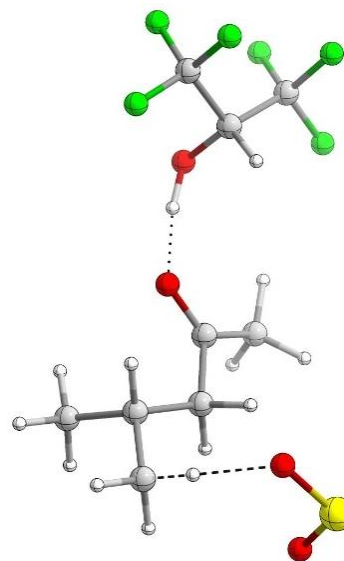



H 1.4091809421 -2.6479918808 -4.4268207903  
C 1.121010751 -5.4217133895 -4.5747131946  
H 0.6703980654 -6.35036324 -4.9269518629  
H 1.8521130441 -5.0698985919 -5.3037636567  
O 2.659777446 -5.7260152137 -2.1863162345  
O 4.0045502493 -4.1739521918 -3.6924529936  
S 3.9663735195 -4.8573977845 -2.3896487543  
H -0.2847626527 -0.1104822903 -2.2845855278  
C -0.7138926472 -4.0308272089 -5.5237280329  
H -0.0486570202 -3.6340049581 -6.294319509  
H -1.1960578832 -4.9245525479 -5.9205992868  
H -1.4862262614 -3.2900512249 -5.3174105542  
H -0.6084331989 -4.7514427796 -3.5059521706  
O -1.3538553227 -2.3389025645 -2.9021572557  
O -2.95523163 -0.5704072151 -1.7064421963  
C -2.8235009726 -0.9570679433 -0.3839127072  
H -1.9512476618 -1.5951402871 -0.2062294057  
C -4.0517372084 -1.7674846164 0.0397503915  
C -2.6269694854 0.3042880007 0.454978123  
F -5.1774883086 -1.0576077043 -0.0351795016  
F -3.9442006354 -2.2322190159 1.2860898448  
F -4.183081635 -2.8184162074 -0.7717924364  
F -3.607023202 1.1876563266 0.2724234183  
F -2.5595608433 0.0330886274 1.7596441238  
F -1.4827144728 0.8964274927 0.1063401486  
H -2.4144457863 -1.1823368153 -2.2572680751  
H 1.6905858551 -5.6892936256 -3.6505656864

**<sup>3</sup>TS<sub>D-c</sub>**

E(UM062X) = -1649.50354643

E(UωB97XD) = -1649.71845268

Charge = 0    Multiplicity = 3

|   |               |               |               |
|---|---------------|---------------|---------------|
| C | -0.2050021971 | -0.5001605919 | 2.1326673306  |
| H | 0.0384092632  | -0.0595351866 | 1.1619301498  |
| H | 0.2830174206  | 0.1112064203  | 2.8916494063  |
| C | 2.3806587364  | -3.4180941298 | 1.9561694464  |
| C | 0.3376355738  | -1.8973559123 | 2.1547691567  |
| C | 1.8234329401  | -2.0503361204 | 2.3291026761  |
| H | 2.0080309825  | -1.8332813445 | 3.3894942209  |
| H | 2.3296730446  | -1.2514373813 | 1.7781132236  |
| C | 3.8448892279  | -3.5164864298 | 2.3472309649  |
| H | 4.2561613385  | -4.5102661771 | 2.1659583157  |
| H | 4.4531749091  | -2.7691123452 | 1.8365596426  |
| O | 4.0051922044  | -2.656972687  | 5.0572539556  |
| O | 4.6241181895  | -0.6423721245 | 3.6255641015  |
| S | 4.4415633725  | -1.1378208796 | 4.9992356785  |
| H | -1.2837711524 | -0.4940938519 | 2.2727988068  |
| C | 2.235260602   | -3.6821077843 | 0.455366487   |
| H | 2.7834795551  | -2.9287737832 | -0.115464875  |
| H | 2.6370205926  | -4.6618147038 | 0.1956696269  |
| H | 1.1882291916  | -3.6531461896 | 0.1530907386  |
| H | 1.814125524   | -4.1770107188 | 2.5000989899  |
| O | -0.3885887459 | -2.8691286456 | 2.0437306769  |
| O | -2.970711182  | -2.5377176877 | 1.4601262085  |
| C | -2.872526451  | -2.2285188076 | 0.1147940142  |
| H | -1.8853654274 | -1.8484445332 | -0.1722133619 |
| C | -3.8750093907 | -1.1141474519 | -0.1771949588 |

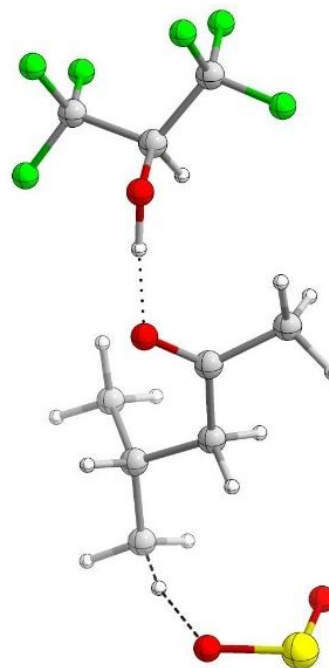

|   |               |               |               |
|---|---------------|---------------|---------------|
| C | -3.1153552347 | -3.4849000751 | -0.7268242131 |
| F | -5.1095530563 | -1.436783189  | 0.2036795142  |
| F | -3.9151945222 | -0.8047035331 | -1.4743408966 |
| F | -3.5226435493 | -0.0135907516 | 0.4902729474  |
| F | -4.3403512127 | -3.9810243692 | -0.5555021907 |
| F | -2.9440011002 | -3.259434547  | -2.0307100796 |
| F | -2.2432070535 | -4.4276601576 | -0.3634279301 |
| H | -2.062063681  | -2.7114485057 | 1.7983729898  |
| H | 3.9622382879  | -3.3331328246 | 3.4449502365  |

### <sup>3</sup>T<sub>D-d</sub>

E(UM062X) = -1649.50355264

E(UωB97XD) = -1649.71819745

Charge = 0    Multiplicity = 3

|   |               |               |              |
|---|---------------|---------------|--------------|
| C | -0.335683628  | -0.6367735473 | 2.1164979331 |
| H | 0.1245477746  | 0.1229903024  | 1.480091999  |
| H | -0.1084247651 | -0.3704555985 | 3.1492352866 |
| C | 2.4088729442  | -3.3534151282 | 1.5442130539 |
| C | 0.2775449705  | -1.9608632413 | 1.7759600092 |
| C | 1.6986103621  | -2.1857396876 | 2.2161556588 |
| H | 1.6358109717  | -2.3450567829 | 3.3007252256 |
| H | 2.2613940067  | -1.2550760921 | 2.0938976222 |
| C | 3.7468679519  | -3.6142390472 | 2.2138146636 |
| H | 4.2552244693  | -4.4841461405 | 1.796249495  |
| H | 4.4043392806  | -2.7454872979 | 2.1607977725 |
| O | 3.2064438731  | -3.8536037523 | 5.0109332309 |
| O | 3.9608030865  | -1.4495180458 | 4.6417640625 |
| S | 3.5255023242  | -2.4382653671 | 5.6411074247 |
| H | -1.410216791  | -0.646052468  | 1.9530727606 |

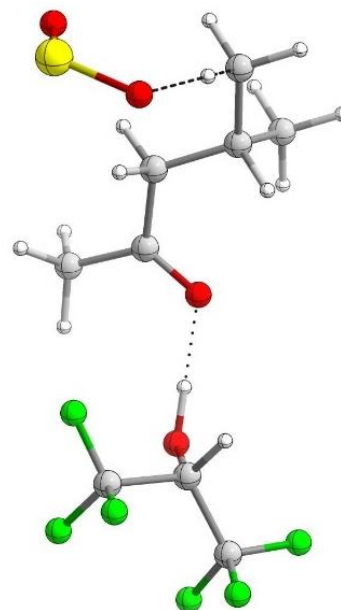

|   |               |               |               |
|---|---------------|---------------|---------------|
| C | 2.6273684928  | -3.0812507421 | 0.0541252612  |
| H | 3.2513831364  | -2.194449085  | -0.0800741705 |
| H | 3.129707397   | -3.9235895456 | -0.4222600156 |
| H | 1.6781685387  | -2.9177578034 | -0.4560194245 |
| H | 1.7797712267  | -4.2402723476 | 1.6476026024  |
| O | -0.3433625513 | -2.8250916274 | 1.1831125287  |
| O | -2.9963448661 | -2.7522916932 | 0.9342908735  |
| C | -3.3237873266 | -3.7881671496 | 1.7925433895  |
| H | -2.5264223797 | -4.5314868687 | 1.8952748454  |
| C | -4.5332073261 | -4.5115275082 | 1.2042808767  |
| C | -3.5901354424 | -3.2360157253 | 3.1960278433  |
| F | -5.5514810468 | -3.6827197921 | 0.9769848787  |
| F | -4.9709010329 | -5.4843736045 | 2.0064138682  |
| F | -4.2000674382 | -5.0674954796 | 0.0393496454  |
| F | -4.620273309  | -2.3911401367 | 3.2237714589  |
| F | -3.8290407769 | -4.2024137394 | 4.0834911847  |
| F | -2.5109390284 | -2.5662185836 | 3.6130709928  |
| H | -2.0144369394 | -2.6796133998 | 0.9117718337  |
| H | 3.5961348409  | -3.838896274  | 3.2985683292  |

### <sup>3</sup>TS<sub>D-e</sub>

E(UM062X) = -1649.50355077

E(U $\omega$ B97XD) = -1649.71845424

Charge = 0    Multiplicity = 3

|   |               |               |              |
|---|---------------|---------------|--------------|
| C | -0.1839600222 | -0.4859628264 | 2.0906434728 |
| H | 0.0582911047  | -0.0650182856 | 1.1108800205 |
| H | 0.3110723854  | 0.1364286563  | 2.8360190624 |
| C | 2.382508552   | -3.4223123352 | 1.9523758536 |
| C | 0.3500277867  | -1.885862516  | 2.1373935426 |

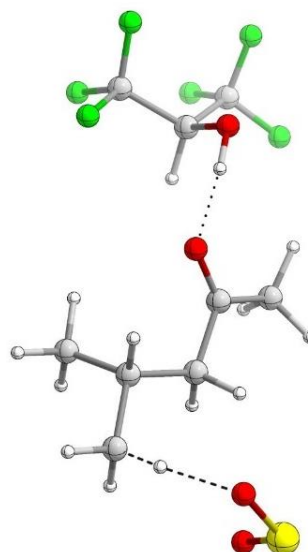

[Go back to table of contents](#)

C 1.8360390644 -2.0447801351 2.3046163549  
H 2.029006497 -1.8102263183 3.3597772846  
H 2.3436308647 -1.2589386079 1.7364337143  
C 3.8486174701 -3.5227224254 2.3357548994  
H 4.2530122053 -4.5217118427 2.1682269285  
H 4.4579927288 -2.7873686397 1.8091019401  
O 4.0317769891 -2.6260055808 5.0333156546  
O 4.6456753821 -0.6328873343 3.5701158375  
S 4.4750377325 -1.1099787474 4.9518215397  
H -1.2620242169 -0.4702783399 2.2354750239  
C 2.2253878755 -3.7117180965 0.4574682155  
H 2.773933019 -2.9716693096 -0.1301856835  
H 2.6197087957 -4.6981718065 0.2123135659  
H 1.1764586766 -3.6819355035 0.1618782312  
H 1.8150335621 -4.1680773812 2.5132409842  
O -0.3830440754 -2.8550410244 2.0515296386  
O -2.9717245193 -2.5194744538 1.4972774204  
C -2.8874656627 -2.2273862076 0.1471704292  
H -1.902602952 -1.8529018616 -0.1546669459  
C -3.8909147893 -1.1147638402 -0.1480701028  
C -3.141319406 -3.4937198854 -0.6760991988  
F -5.1219635874 -1.4303329605 0.2496063268  
F -3.944035406 -0.8212486039 -1.4484338892  
F -3.5296590806 -0.0066958716 0.5020290272  
F -4.3651022891 -3.9857534388 -0.4854277407  
F -2.9837886469 -3.2848583197 -1.9844978902  
F -2.2666100603 -4.4332021518 -0.3103529515  
H -2.0598840963 -2.6930101404 1.8267423413  
H 3.9738571186 -3.3220168646 3.4295040928

### <sup>3</sup>TS<sub>D-f</sub>

E(UM062X) = -1649.50357890

E(UωB97XD) = -1649.71817428

Charge = 0    Multiplicity = 3

|   |               |               |               |
|---|---------------|---------------|---------------|
| C | -0.3844439864 | -3.7231746868 | 0.1045470924  |
| H | -0.2478856244 | -4.7768916141 | -0.1506514556 |
| H | 0.151131785   | -3.1399226592 | -0.6450454373 |
| C | 2.2703503851  | -3.6497786205 | 2.9655501344  |
| C | 0.2096582687  | -3.4948445938 | 1.4610858482  |
| C | 1.7112295017  | -3.5062211607 | 1.5562637581  |
| H | 2.0284447077  | -2.5542518993 | 1.1103596359  |
| H | 2.1047690882  | -4.2818230868 | 0.8918488727  |
| C | 3.7736329218  | -3.4336844042 | 2.9629582313  |
| H | 4.1975069458  | -3.4625844426 | 3.9675074901  |
| H | 4.2873865405  | -4.1560801807 | 2.3275738618  |
| O | 4.2236518294  | -0.9753432056 | 1.5852807369  |
| O | 4.5975957505  | -2.8270440914 | -0.1242684485 |
| S | 4.6000955409  | -1.3727784451 | 0.101799208   |
| H | -1.4439272393 | -3.4807414854 | 0.0912705743  |
| C | 1.9538550129  | -5.030439371  | 3.5451450056  |
| H | 2.4062153875  | -5.8111350683 | 2.9289297581  |
| H | 2.3509504031  | -5.1248129036 | 4.5561712066  |
| H | 0.8779165594  | -5.1999810789 | 3.5843345711  |
| H | 1.8022447133  | -2.8911770887 | 3.5966211052  |
| O | -0.4830503703 | -3.2953148961 | 2.4431051678  |
| O | -3.0767509821 | -2.7225415399 | 2.2223976415  |
| C | -3.0946689661 | -1.3997002757 | 2.6290750914  |
| H | -2.3081971006 | -1.1577717543 | 3.3515316505  |

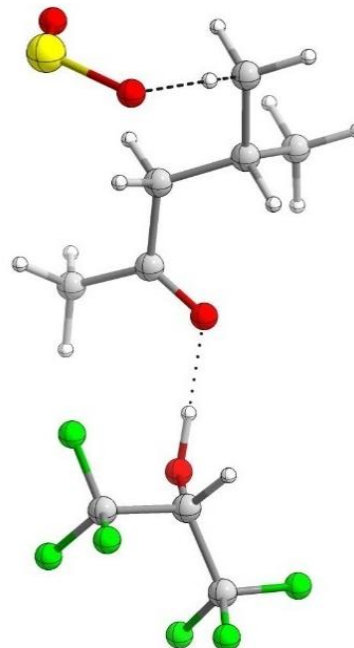

|   |               |               |              |
|---|---------------|---------------|--------------|
| C | -4.4306146776 | -1.1540163127 | 3.3269090119 |
| C | -2.8806210068 | -0.4773272257 | 1.4249070985 |
| F | -5.4656205376 | -1.5079383253 | 2.5664246186 |
| F | -4.590277916  | 0.1284954968  | 3.6604819965 |
| F | -4.4907778335 | -1.8742768856 | 4.4471973636 |
| F | -3.8615812142 | -0.5741490879 | 0.5278162443 |
| F | -2.7770236116 | 0.8035697501  | 1.7816091204 |
| F | -1.7419323282 | -0.8165675134 | 0.8123499218 |
| H | -2.1501669145 | -3.0521302491 | 2.2898035159 |
| H | 4.0144219676  | -2.4191660944 | 2.5584788082 |

### <sup>3</sup>TS<sub>D-g</sub>

E(UM062X) = -1649.50540949

E(UωB97XD) = -1649.71924541

Charge = 0    Multiplicity = 3

|   |               |               |              |
|---|---------------|---------------|--------------|
| C | 1.4178535927  | -1.5003829448 | 0.4737394253 |
| H | 2.4118317127  | -1.9420794794 | 0.5829736973 |
| H | 1.5454720618  | -0.4187633162 | 0.5479082384 |
| C | 0.8886910746  | -2.7198877474 | 4.0105099008 |
| C | 0.5618475926  | -1.9802482293 | 1.6010334103 |
| C | 0.9529796975  | -1.5719334017 | 3.0016514737 |
| H | 0.2573532193  | -0.7719760471 | 3.283388777  |
| H | 1.9497696577  | -1.1260978201 | 2.9986430821 |
| C | 1.1048506159  | -2.2053993811 | 5.4212570053 |
| H | 1.0379058916  | -3.0019609533 | 6.1630839519 |
| H | 2.0563169761  | -1.6817743587 | 5.525515524  |
| O | -1.00974647   | -0.3035914873 | 5.656172789  |
| O | 1.0654077268  | 1.0921738779  | 5.2091588866 |
| S | -0.3866856211 | 1.1417727465  | 5.4376409715 |

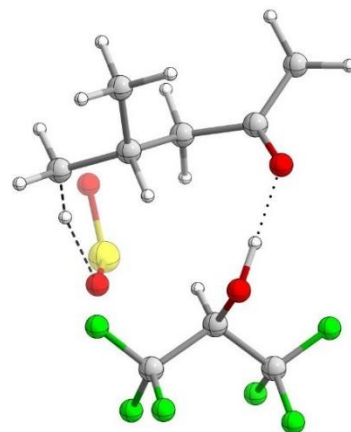

H 0.9882464833 -1.7727005927 -0.4858736129  
C 1.9324313781 -3.7869566313 3.673862911  
H 2.9372496146 -3.3600929087 3.710568744  
H 1.8851586609 -4.6114421139 4.3851016705  
H 1.768461167 -4.1948631531 2.6745353796  
H -0.0990707821 -3.1833685999 3.9560798835  
O -0.4226317164 -2.6667028132 1.3980377287  
O -2.4443732085 -3.5113027265 2.9760755365  
C -2.7737510437 -2.3690063403 3.6849332144  
H -1.9407225212 -1.6644273777 3.7875187018  
C -3.1572714626 -2.8018291671 5.0992588832  
C -3.8995539098 -1.6098896431 2.9767987277  
F -4.0468902805 -3.7924670887 5.0925811657  
F -3.6717289042 -1.7982339836 5.8104126931  
F -2.0717025425 -3.2413931557 5.74099131  
F -5.0464011342 -2.2897669798 2.9721293204  
F -4.1300731567 -0.4219631372 3.5399845479  
F -3.5526830738 -1.3922667118 1.707428989  
H -1.6963767921 -3.2962692498 2.3779432634  
H 0.3051974959 -1.4720670836 5.6907508094

### **<sup>3</sup>TS<sub>D-h</sub>**

E(UM062X) = -1649.50357923

E(UωB97XD) = -1649.71801578

Charge = 0    Multiplicity = 3

C -0.4247281288 -0.9182203879 -0.2564869816  
H -0.4996110593 -0.3021883323 -1.1558247619  
H -0.2446904184 -0.2428842887 0.5805694767  
C 3.2318204988 -2.1214848046 -0.9035258305

[Go back to table of contents](#)



|   |               |               |               |
|---|---------------|---------------|---------------|
| C | 0.7353532998  | -1.8509631451 | -0.4279669646 |
| C | 2.1112011271  | -1.245174483  | -0.3599780741 |
| H | 2.2706243215  | -1.0304560266 | 0.7049322396  |
| H | 2.0957825312  | -0.2680709503 | -0.8527452004 |
| C | 4.585084436   | -1.5155793378 | -0.5757882152 |
| H | 5.4110333969  | -2.1448330709 | -0.909514642  |
| H | 4.6956206821  | -0.5138739557 | -0.9932559733 |
| O | 4.5240961426  | -1.1241469481 | 2.2527846324  |
| O | 4.0159532006  | 1.1488620618  | 1.226446636   |
| S | 4.1877113417  | 0.4049991196  | 2.4845622172  |
| H | -1.3528191182 | -1.4651004596 | -0.1116189688 |
| C | 3.1031729688  | -2.3003056765 | -2.4180250925 |
| H | 3.1753733938  | -1.3324957737 | -2.9199972912 |
| H | 3.8990078446  | -2.9400076609 | -2.8003711831 |
| H | 2.1467528197  | -2.7543111555 | -2.6774811105 |
| H | 3.1569402876  | -3.1026468408 | -0.4295021901 |
| O | 0.5812351988  | -3.0470723366 | -0.599202382  |
| O | -1.7158245623 | -4.2591778435 | 0.0071276462  |
| C | -1.3201278384 | -4.9303351906 | 1.1515584179  |
| H | -0.2583771654 | -5.1980000753 | 1.149560251   |
| C | -2.108962202  | -6.236510634  | 1.212826919   |
| C | -1.5459940769 | -4.0465832572 | 2.3822286264  |
| F | -3.4226644857 | -6.0328803001 | 1.1254148251  |
| F | -1.87529539   | -6.9071961253 | 2.3428499703  |
| F | -1.7555551369 | -7.0220761509 | 0.1953751047  |
| F | -2.8330349745 | -3.7590048302 | 2.5740765404  |
| F | -1.0802670275 | -4.6063141173 | 3.4993735502  |
| F | -0.8972963122 | -2.8896994798 | 2.2132161296  |
| H | -0.9331459464 | -3.7780122406 | -0.3475809171 |

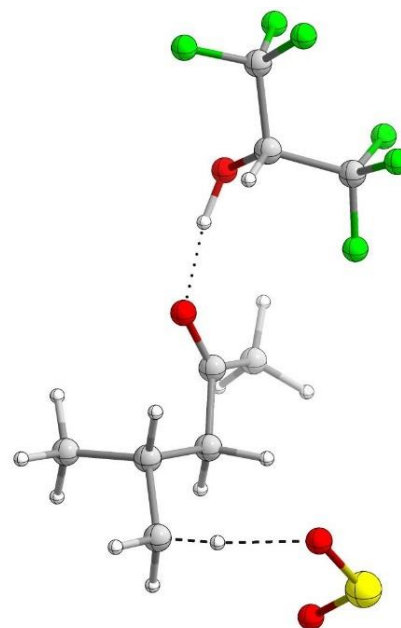

H 4.7037683514 -1.4170863021 0.5317675963

### <sup>3</sup>TS<sub>D-i</sub>

E(UM062X) = -1649.50310646

E(UωB97XD) = -1649.71740672

Charge = 0 Multiplicity = 3

|   |               |               |               |
|---|---------------|---------------|---------------|
| C | 0.5887500871  | -1.3963252148 | -2.8009019016 |
| H | 1.1574348123  | -1.0125536058 | -3.6507233642 |
| H | 1.2723970411  | -2.0038493495 | -2.2061402663 |
| C | -1.2453459735 | -4.1917442274 | -4.8198407327 |
| C | -0.5287399162 | -2.2479100069 | -3.3242889996 |
| C | -0.1416389183 | -3.5361439103 | -4.0006096591 |
| H | 0.1784733384  | -4.1975041226 | -3.1849473585 |
| H | 0.7547494484  | -3.3675899428 | -4.6054038752 |
| C | -0.8262133953 | -5.5845577999 | -5.2559780572 |
| H | -1.6146025397 | -6.0995570974 | -5.8062413111 |
| H | 0.0862166757  | -5.5674229654 | -5.8537428732 |
| O | -0.0961237572 | -6.9003011447 | -2.8227373019 |
| O | 2.0950101342  | -6.174275611  | -3.8955990859 |
| S | 1.4833340463  | -6.8476641876 | -2.7387684004 |
| H | 0.2089256566  | -0.5659540883 | -2.2111483806 |
| C | -1.5888039121 | -3.3502182638 | -6.0510947867 |
| H | -0.7151012287 | -3.257014535  | -6.7006318594 |
| H | -2.3897843083 | -3.8158706288 | -6.6259162102 |
| H | -1.9135232541 | -2.3508580889 | -5.7615447912 |
| H | -2.1353786148 | -4.2676387625 | -4.1912870886 |
| O | -1.6966519246 | -1.9314066547 | -3.193920583  |
| O | -2.3843654167 | 0.1360169719  | -1.6068734917 |
| C | -2.7152943282 | -0.2230824335 | -0.3140030999 |

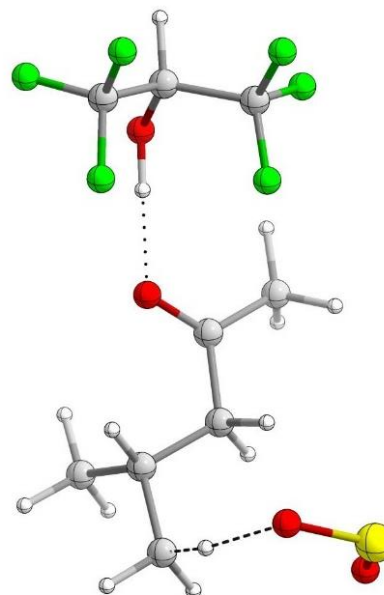

|   |               |               |               |
|---|---------------|---------------|---------------|
| H | -2.965094191  | 0.6775954067  | 0.2511640033  |
| C | -1.5215260542 | -0.8668644906 | 0.3981200002  |
| C | -3.9627254869 | -1.11155977   | -0.2990711759 |
| F | -1.1429356345 | -2.0059294095 | -0.1925326982 |
| F | -1.776754131  | -1.1371887327 | 1.6771585453  |
| F | -0.4791864647 | -0.0360597364 | 0.3607942565  |
| F | -3.7799230096 | -2.2336584082 | -0.9987811936 |
| F | -4.3270326256 | -1.4555654096 | 0.9366001804  |
| F | -4.9824202053 | -0.4565062567 | -0.85359483   |
| H | -2.1632009824 | -0.6521243854 | -2.1607192457 |
| H | -0.6123560125 | -6.2190941379 | -4.361112364  |

### <sup>3</sup>TS<sub>D-j</sub>

E(UM062X) = -1649.50303701

E(UωB97XD) = -1649.71731214

Charge = 0    Multiplicity = 3

|   |               |               |               |
|---|---------------|---------------|---------------|
| C | -1.5595790889 | -1.6537669782 | 3.0561263139  |
| H | -1.5370678178 | -1.7748871994 | 4.1398712469  |
| H | -1.8770125511 | -2.6093171358 | 2.6324778849  |
| C | 2.2037017182  | -2.1590965926 | 2.191616675   |
| C | -0.1848553009 | -1.3450393377 | 2.5471702367  |
| C | 0.9383966532  | -2.2174974931 | 3.0476556715  |
| H | 0.5734281718  | -3.2446492412 | 3.1406183527  |
| H | 1.1397152146  | -1.8780554074 | 4.0708669095  |
| O | 5.3915258141  | -3.1873930825 | 1.2312989972  |
| O | 6.081560738   | -5.0609017968 | -0.1028284184 |
| S | 5.1029727602  | -4.7527747726 | 0.9535319748  |
| H | -2.2661841686 | -0.8772736349 | 2.7742307591  |
| C | 3.3308701991  | -2.846345671  | 2.9373979546  |

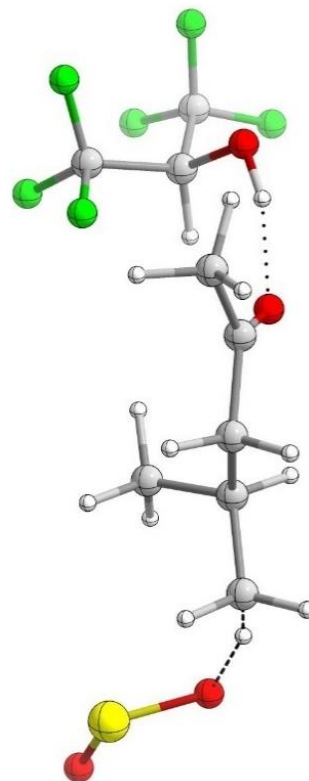

H 3.1317205354 -3.9061790366 3.1112663838  
H 4.2747731872 -2.7927113501 2.3044337416  
H 3.5993131795 -2.3601740356 3.8758505737  
C 1.9703738458 -2.8024302521 0.8278946407  
H 2.853067394 -2.6990008408 0.1952966897  
H 1.7567672358 -3.8686712149 0.9420979739  
H 1.1304777117 -2.3389441384 0.3097922149  
H 2.461945429 -1.1078581717 2.0501423155  
O 0.0286916771 -0.4273460484 1.7775360509  
H -1.2329198781 0.4173657616 0.9645442503  
O -1.8527509337 0.7337087964 0.2710658575  
C -1.4579576289 0.1661607938 -0.928835497  
H -0.3849266262 -0.0491488525 -0.9711736134  
C -1.7525856179 1.1776056795 -2.0340829693  
C -2.1810555636 -1.1673159822 -1.1425240709  
F -1.5016315882 0.6762191736 -3.2452829029  
F -0.983357141 2.2543234783 -1.8736077606  
F -3.0209464485 1.5844897701 -2.0170032601  
F -1.9605737226 -1.9583984019 -0.0870271637  
F -3.4999037316 -1.0195303786 -1.2618220617  
F -1.7409886572 -1.8118624064 -2.2236959514

**<sup>3</sup>TS<sub>D</sub>-k**

E(UM062X) = -1649.50459970

E(UωB97XD) = -1649.71761929

Charge = 0    Multiplicity = 3

C -0.6452427603 -2.7025633626 -0.3305638923  
H -0.9481633069 -2.2730620983 -1.2888608066  
H -0.796638191 -1.9377823838 0.4307053637

[Go back to table of contents](#)

|   |               |               |               |
|---|---------------|---------------|---------------|
| C | 3.2305777002  | -2.3344709289 | -0.6825979481 |
| C | 0.8042800673  | -3.0706411093 | -0.4285968061 |
| C | 1.8014403576  | -1.9499323314 | -0.3227606266 |
| H | 1.7363597638  | -1.6156863734 | 0.720883932   |
| H | 1.447581491   | -1.1037172036 | -0.9210105731 |
| C | 4.2183434299  | -1.3244905319 | -0.130647131  |
| H | 5.2510326343  | -1.5878753394 | -0.3579073932 |
| H | 4.010633052   | -0.3064582505 | -0.4689160159 |
| O | 3.4850399157  | -1.6808176894 | 2.5363475016  |
| O | 4.8420743713  | -3.7419742391 | 1.9152588273  |
| S | 3.9013265712  | -3.1662489915 | 2.8893525793  |
| H | -1.2562326624 | -3.577331736  | -0.1209803742 |
| C | 3.3939670065  | -2.463640641  | -2.1975037589 |
| H | 3.2102051894  | -1.5025425154 | -2.6836022204 |
| H | 4.4029579273  | -2.7874578599 | -2.4539251251 |
| H | 2.6893241831  | -3.1926899231 | -2.5997414846 |
| H | 3.4429488074  | -3.3051099787 | -0.2302818213 |
| O | 1.1633166333  | -4.2264210449 | -0.5661177116 |
| O | -0.1180241806 | -6.1298145937 | 0.799527994   |
| C | 0.7920647166  | -6.1491548539 | 1.8442292014  |
| H | 1.8004728319  | -5.8459036091 | 1.5428784911  |
| C | 0.8895495408  | -7.5897901369 | 2.3430090962  |
| C | 0.347129754   | -5.1726957707 | 2.9371341416  |
| F | -0.298260304  | -8.0775115851 | 2.6994563767  |
| F | 1.7070290806  | -7.7002749358 | 3.3917408464  |
| F | 1.3693867586  | -8.3669191951 | 1.3726699318  |
| F | -0.8523525589 | -5.473108493  | 3.4298820056  |
| F | 1.2081189309  | -5.1228830479 | 3.9546087011  |
| F | 0.2700386605  | -3.9404905411 | 2.4190494872  |

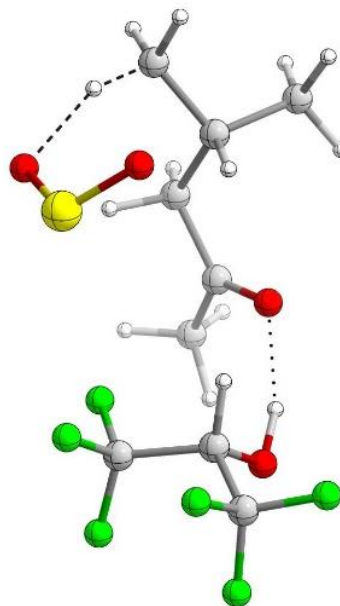

|   |              |               |              |
|---|--------------|---------------|--------------|
| H | 0.2133072643 | -5.4992723006 | 0.1249667845 |
| H | 4.1450103245 | -1.287946405  | 0.9906754279 |

### <sup>3</sup>TS<sub>D</sub>-1

E(UM062X) = -1649.50427831

E(UωB97XD) = -1649.71782085

Charge = 0    Multiplicity = 3

|   |               |               |               |
|---|---------------|---------------|---------------|
| C | -1.5776760103 | -1.7132599306 | 1.3883055993  |
| H | -1.6790370829 | -0.7464267748 | 0.8890413607  |
| H | -1.3361661277 | -1.5014318354 | 2.4319597881  |
| C | 1.8256078651  | -2.770259231  | 1.770133241   |
| C | -0.4458961585 | -2.4546733722 | 0.7548740646  |
| C | 0.9438569404  | -1.8822854932 | 0.877578757   |
| H | 0.9059780581  | -0.8699089912 | 1.2837670938  |
| H | 1.3784812764  | -1.8394617636 | -0.1247332974 |
| O | 4.021676511   | -2.0746869053 | -0.9361622696 |
| O | 6.1385724961  | -2.8796658466 | 0.222950876   |
| S | 5.521160742   | -2.5505242487 | -1.0715875179 |
| H | -2.5047425337 | -2.2741295094 | 1.3118585014  |
| C | 3.2511332233  | -2.253624342  | 1.7781066174  |
| H | 3.9268001496  | -2.9080344267 | 2.3274893286  |
| H | 3.6327633813  | -2.2100134688 | 0.7245140082  |
| H | 3.3198565007  | -1.2365585572 | 2.1693025053  |
| C | 1.2836959337  | -2.8501463971 | 3.1979626953  |
| H | 1.9416527557  | -3.4520309941 | 3.8248687224  |
| H | 1.2122342562  | -1.8524747071 | 3.637493447   |
| H | 0.2924420682  | -3.3078205845 | 3.2215936051  |
| H | 1.8254783248  | -3.7757890626 | 1.3429220248  |
| O | -0.6293352345 | -3.5052323067 | 0.1632903969  |

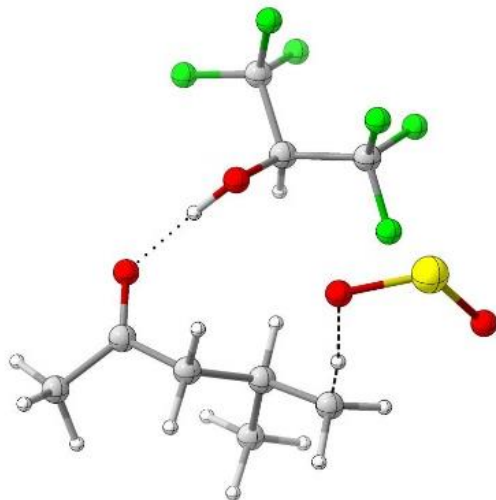

|   |               |               |               |
|---|---------------|---------------|---------------|
| H | 0.6413895259  | -4.0992641113 | -0.7776131703 |
| O | 1.4174878217  | -4.4295540235 | -1.2896321867 |
| C | 1.7530350669  | -5.6968032679 | -0.8499955016 |
| H | 1.4034473731  | -5.9145367232 | 0.165229813   |
| C | 3.2784356936  | -5.7857010907 | -0.8227203781 |
| C | 1.1182781676  | -6.7503148317 | -1.7635484814 |
| F | 3.7037285291  | -7.0199437817 | -0.5510351508 |
| F | 3.7578682205  | -4.9761371744 | 0.1263537116  |
| F | 3.8233808341  | -5.4107525222 | -1.9784450144 |
| F | -0.1974617793 | -6.5395200666 | -1.8258631918 |
| F | 1.5956389815  | -6.695321886  | -3.007297184  |
| F | 1.3063672302  | -7.9901387717 | -1.3081838136 |

### **<sup>3</sup>TS<sub>D-m</sub>**

E(UM062X) = -1649.50480700

E(UωB97XD) = -1649.71731292

Charge = 0    Multiplicity = 3

|   |               |               |               |
|---|---------------|---------------|---------------|
| C | -1.5693157116 | -2.0584288006 | 1.3454803428  |
| H | -1.7930322591 | -1.0263456468 | 1.0664148456  |
| H | -1.4329022808 | -2.0660232964 | 2.4297982804  |
| C | 2.0544510423  | -2.5493152678 | 1.6131354724  |
| C | -0.289370657  | -2.4710640203 | 0.6951327653  |
| C | 0.9547838729  | -1.6728272564 | 0.9995205761  |
| H | 0.7201872512  | -0.8421651088 | 1.6676591374  |
| H | 1.3072602167  | -1.2570534171 | 0.0507384218  |
| O | 3.844702039   | -1.5270428788 | -0.8317250703 |
| O | 4.8531668597  | -3.0198422849 | -2.4211128951 |
| S | 4.7501928389  | -2.8602898701 | -0.9620308742 |
| H | -2.3846375479 | -2.7157389261 | 1.0577087033  |

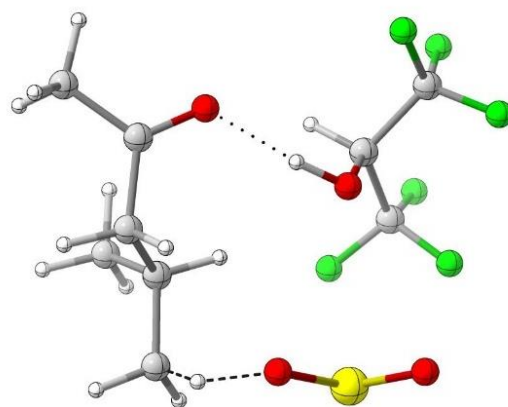

C 3.3379680229 -1.7604476681 1.7524118776  
H 4.1672056042 -2.360526214 2.1278537816  
H 3.6500358815 -1.3868954311 0.7154483005  
H 3.2273339931 -0.8493425339 2.3445027483  
C 1.6275695541 -3.1149243748 2.9681652673  
H 2.4190073117 -3.7307416159 3.3957839  
H 1.4040282889 -2.3075130087 3.6690407649  
H 0.7365462441 -3.7387595661 2.8686174849  
H 2.2424485816 -3.3829949015 0.9330321704  
O -0.240599131 -3.4286384764 -0.0565095406  
H 1.1513812881 -3.9316912166 -0.9534368191  
O 1.8967990576 -4.4651279778 -1.3077614086  
C 1.7337969897 -5.7602307428 -0.8423730197  
H 1.0550465407 -5.8237395823 0.0148766557  
C 3.0961756724 -6.2655768864 -0.3699071676  
C 1.1320039805 -6.632613131 -1.9479438641  
F 3.065272657 -7.5572659249 -0.0399946549  
F 3.4757059574 -5.5821966349 0.7141244852  
F 4.0399495562 -6.1029806141 -1.2951954161  
F 0.0022058386 -6.073465064 -2.3826190105  
F 1.9499669835 -6.7579098214 -2.9933801492  
F 0.8334624627 -7.8584928392 -1.5137320916

### <sup>3</sup>TS<sub>D-n</sub>

E(UM062X) = -1649.50672598

E(UωB97XD) = -1649.71762810

Charge = 0    Multiplicity = 3

C 7.7725963616 2.9938329971 -0.8651172218  
H 8.615795851 2.4638469075 -1.3157424569

[Go back to table of contents](#)



|   |              |               |               |
|---|--------------|---------------|---------------|
| H | 7.8661463379 | 2.8948822035  | 0.2159904702  |
| C | 5.0223156886 | 0.2752529194  | -1.4181183295 |
| C | 6.512398241  | 2.3438278653  | -1.3514137549 |
| C | 6.1177455479 | 1.0478865562  | -0.6967237083 |
| H | 5.7989123178 | 1.3362926444  | 0.3138785177  |
| H | 7.0140018956 | 0.4364696553  | -0.5493848731 |
| C | 4.358088911  | -0.7157621941 | -0.4810814234 |
| H | 3.5439369094 | -1.2625891201 | -0.9577230906 |
| H | 5.0689901929 | -1.4209962513 | -0.0455033215 |
| O | 3.6890848422 | 0.6759182072  | 1.880410378   |
| O | 3.2405394134 | 2.4258341646  | 0.104361411   |
| S | 3.2698199818 | 2.1714714573  | 1.555403673   |
| H | 7.8088088726 | 4.0400807661  | -1.1592113958 |
| C | 5.5866543873 | -0.4483387049 | -2.6420076534 |
| H | 6.3298211138 | -1.1902482124 | -2.3405383749 |
| H | 4.7958390037 | -0.9614760293 | -3.18971685   |
| H | 6.0649504874 | 0.2607202239  | -3.3197173083 |
| H | 4.2726742003 | 0.9929335719  | -1.7509995728 |
| O | 5.8290042217 | 2.8464878615  | -2.2244958788 |
| O | 5.3207928197 | 5.4716741637  | -2.0332479898 |
| C | 4.2027785199 | 5.2744989831  | -1.2351165085 |
| H | 3.7757173774 | 4.2710906358  | -1.3274453948 |
| C | 3.1305344586 | 6.2674193713  | -1.6772070538 |
| C | 4.5978882455 | 5.4431620406  | 0.2338019463  |
| F | 3.5427899343 | 7.5320057513  | -1.576982913  |
| F | 2.0124599161 | 6.1460218207  | -0.9586428031 |
| F | 2.8154132746 | 6.047711149   | -2.9532573928 |
| F | 5.1615898625 | 6.6248642548  | 0.4758977727  |
| F | 3.5618960126 | 5.3103046664  | 1.0655641454  |

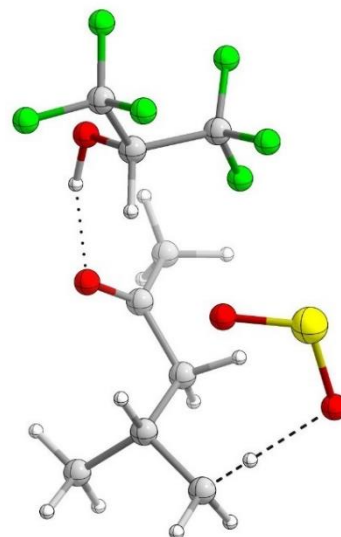

|   |              |               |               |
|---|--------------|---------------|---------------|
| F | 5.4930391965 | 4.5008833405  | 0.5570276753  |
| H | 5.6651478769 | 4.5910784488  | -2.2863774701 |
| H | 3.8951817265 | -0.1685461151 | 0.3836907502  |

### <sup>3</sup>T<sub>SE-a</sub>

E(UM062X) = -1649.50757855

E(UωB97XD) = -1649.71993460

Charge = 0    Multiplicity = 3

|   |           |           |           |
|---|-----------|-----------|-----------|
| C | -0.123562 | -0.964671 | 2.006366  |
| H | 0.102555  | -0.210357 | 1.248456  |
| H | 0.228367  | -0.576345 | 2.96199   |
| C | 2.866009  | -3.366658 | 1.222266  |
| H | -1.197042 | -1.136762 | 2.033867  |
| C | 0.612939  | -2.218475 | 1.644068  |
| C | 2.10029   | -2.227608 | 1.875338  |
| H | 2.224028  | -2.252993 | 2.96517   |
| H | 2.504419  | -1.259376 | 1.559459  |
| O | 1.383645  | -5.244566 | 2.758679  |
| O | 0.995851  | -6.183346 | 0.44104   |
| S | 0.494074  | -6.181549 | 1.823044  |
| H | 2.355282  | -4.313651 | 1.511247  |
| C | 2.834416  | -3.286813 | -0.297484 |
| H | 3.335001  | -2.37114  | -0.62615  |
| H | 3.357656  | -4.135464 | -0.738191 |
| H | 1.813545  | -3.280146 | -0.676911 |
| C | 4.287402  | -3.442286 | 1.759459  |
| H | 4.827917  | -4.274482 | 1.308049  |
| H | 4.826849  | -2.521122 | 1.522399  |
| H | 4.296242  | -3.570402 | 2.842761  |

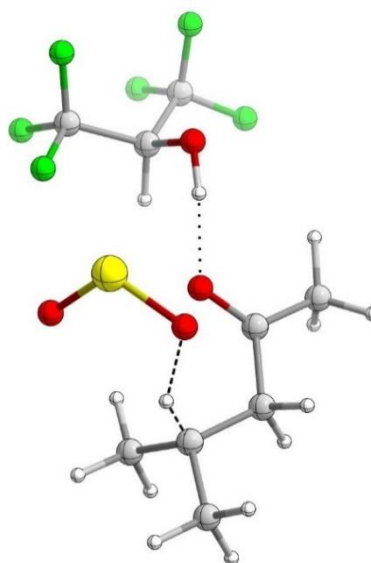

|   |           |           |           |
|---|-----------|-----------|-----------|
| O | 0.036229  | -3.191196 | 1.192157  |
| H | -1.650163 | -3.370499 | 1.24979   |
| O | -2.621605 | -3.41459  | 1.101448  |
| C | -2.846813 | -3.174178 | -0.243439 |
| H | -2.005699 | -2.674174 | -0.73562  |
| C | -4.04716  | -2.23691  | -0.355505 |
| C | -3.056571 | -4.502791 | -0.974744 |
| F | -5.11569  | -2.710112 | 0.283812  |
| F | -4.394964 | -2.018283 | -1.625128 |
| F | -3.743193 | -1.057431 | 0.18939   |
| F | -4.136418 | -5.155022 | -0.542667 |
| F | -3.179776 | -4.338387 | -2.293272 |
| F | -1.999556 | -5.288446 | -0.762796 |

### <sup>3</sup>T<sub>E</sub>-b

E(UM062X) = -1649.50757761

E(UωB97XD) = -1649.71924930

Charge = 0    Multiplicity = 3

|   |          |           |          |
|---|----------|-----------|----------|
| C | 1.106729 | -3.687258 | 4.942775 |
| H | 1.241138 | -4.558624 | 4.296962 |
| H | 0.082176 | -3.340354 | 4.811591 |
| C | 2.083572 | -2.635026 | 4.511164 |
| C | 1.751334 | -1.878552 | 3.25197  |
| H | 0.81909  | -1.342297 | 3.467088 |
| H | 1.49485  | -2.601903 | 2.469133 |
| O | 3.329286 | 0.868096  | 4.959792 |
| O | 2.567866 | 3.094577  | 5.438912 |
| S | 2.29319  | 2.015351  | 4.476603 |
| H | 3.12796  | -0.313486 | 3.660053 |

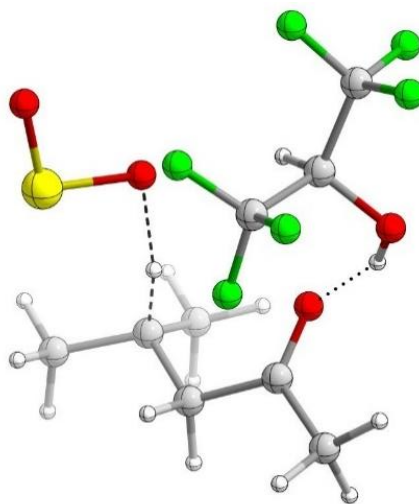

|   |          |           |           |
|---|----------|-----------|-----------|
| H | 1.281543 | -3.978793 | 5.975566  |
| C | 2.822491 | -0.917072 | 2.76444   |
| C | 4.080107 | -1.627204 | 2.283335  |
| H | 3.836503 | -2.24142  | 1.411653  |
| H | 4.839313 | -0.904792 | 1.982796  |
| H | 4.498183 | -2.271097 | 3.054796  |
| C | 2.272851 | 0.025553  | 1.705262  |
| H | 3.016533 | 0.771464  | 1.421785  |
| H | 2.008185 | -0.542664 | 0.809665  |
| H | 1.373638 | 0.542002  | 2.045339  |
| O | 3.088219 | -2.391142 | 5.152119  |
| H | 3.010825 | -2.570218 | 6.911868  |
| O | 2.851886 | -2.267661 | 7.828375  |
| C | 2.891649 | -0.881194 | 7.816075  |
| H | 3.4909   | -0.476491 | 6.995028  |
| C | 3.546063 | -0.431317 | 9.120074  |
| C | 1.479762 | -0.313521 | 7.640602  |
| F | 3.533895 | 0.896535  | 9.251156  |
| F | 4.818188 | -0.829502 | 9.143154  |
| F | 2.944058 | -0.951069 | 10.189368 |
| F | 0.928883 | -0.823375 | 6.532338  |
| F | 0.675737 | -0.616811 | 8.658747  |
| F | 1.487135 | 1.013262  | 7.504321  |

### <sup>3</sup>T<sub>SE-c</sub>

E(UM062X) = -1649.50852743

E(UωB97XD) = -1649.71989565

Charge = 0    Multiplicity = 3

|   |             |               |              |
|---|-------------|---------------|--------------|
| C | 0.485272375 | -0.4212318705 | 0.9398642143 |
|---|-------------|---------------|--------------|

[Go back to table of contents](#)

|   |               |               |               |
|---|---------------|---------------|---------------|
| H | 1.0901597286  | 0.0309847178  | 0.1499910362  |
| H | 0.6996927237  | 0.1222141069  | 1.8600158832  |
| C | 2.7646752832  | -3.5340158726 | 1.5842059354  |
| H | -0.5671428785 | -0.3358474628 | 0.6802348821  |
| C | 0.8955007776  | -1.8567764853 | 1.0713700623  |
| C | 2.215417987   | -2.1258740029 | 1.7429855826  |
| H | 2.0565199135  | -1.8901226815 | 2.8024966692  |
| H | 2.9395237283  | -1.3855204062 | 1.3854443085  |
| O | 0.564426821   | -4.3857823291 | 3.1126126514  |
| O | 0.2278723123  | -5.9406896794 | 1.1442399416  |
| S | -0.4135622189 | -5.3818976679 | 2.3417329442  |
| H | 1.951931527   | -4.2393702628 | 1.864415573   |
| C | 3.1431786595  | -3.8460030432 | 0.142454082   |
| H | 3.9491906299  | -3.1788594786 | -0.1769769816 |
| H | 3.4988900792  | -4.8724930897 | 0.0515797605  |
| H | 2.2977041596  | -3.714767608  | -0.5318495741 |
| C | 3.9231715571  | -3.7728332895 | 2.5410337837  |
| H | 4.3039189067  | -4.7896292121 | 2.442412903   |
| H | 4.7415966268  | -3.0827072195 | 2.3187197437  |
| H | 3.6197492394  | -3.6158151399 | 3.5771315312  |
| O | 0.193479662   | -2.7650722636 | 0.6630039165  |
| H | -1.3182517917 | -2.4506029547 | -0.0737425266 |
| O | -2.2730902989 | -2.2977827405 | -0.2540625705 |
| C | -2.9802882113 | -2.731446459  | 0.8536573871  |
| H | -2.3374848573 | -2.9310445158 | 1.7180461014  |
| C | -3.6937876864 | -4.0455522068 | 0.5258249421  |
| C | -3.9453082841 | -1.6216617377 | 1.2679312784  |
| F | -4.6228955978 | -3.897946485  | -0.4182559316 |
| F | -4.2823687413 | -4.5758398941 | 1.6000762792  |

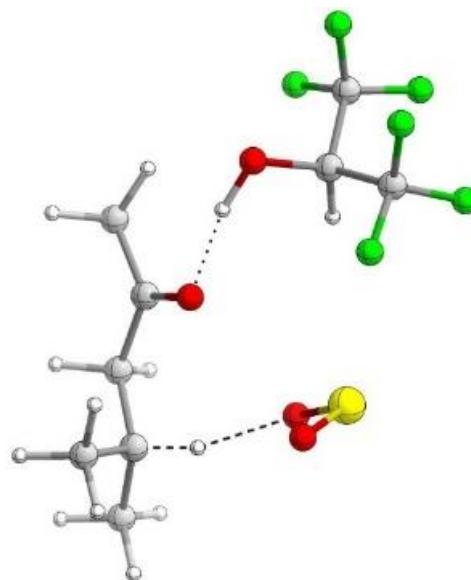

F -2.801427039 -4.9311905907 0.0785687374  
 F -4.7209626365 -1.227338285 0.2599556059  
 F -4.7395479618 -1.9974278633 2.2722142494  
 F -3.2490244939 -0.5592340268 1.6779425986

### <sup>3</sup>TS<sub>E-d</sub>

E(UM062X) = -1649.50795555

E(UωB97XD) = -1649.71969806

Charge = 0 Multiplicity = 3

|   |           |           |           |
|---|-----------|-----------|-----------|
| C | -0.186434 | -1.060423 | 1.453771  |
| H | -0.075127 | -0.684934 | 0.43376   |
| H | 0.225064  | -0.304057 | 2.122687  |
| C | 2.848122  | -3.51729  | 1.331727  |
| H | -1.240329 | -1.225243 | 1.66553   |
| C | 0.591812  | -2.336009 | 1.572595  |
| C | 2.093927  | -2.222038 | 1.584783  |
| H | 2.35136   | -1.809999 | 2.568227  |
| H | 2.389472  | -1.456815 | 0.858815  |
| O | 1.822241  | -4.452654 | 3.765181  |
| O | 1.062392  | -6.407028 | 2.343181  |
| S | 0.861725  | -5.716143 | 3.626017  |
| H | 2.44441   | -4.276299 | 2.041029  |
| C | 2.613014  | -4.054281 | -0.073663 |
| H | 3.007478  | -3.343898 | -0.806376 |
| H | 3.127579  | -5.004973 | -0.214433 |
| H | 1.552535  | -4.204627 | -0.273754 |
| C | 4.328353  | -3.354054 | 1.640814  |
| H | 4.863577  | -4.290281 | 1.480711  |
| H | 4.766779  | -2.597798 | 0.983926  |

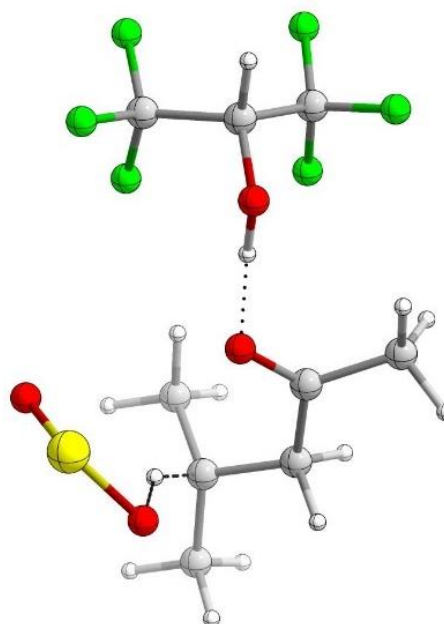

|   |           |           |           |
|---|-----------|-----------|-----------|
| H | 4.484852  | -3.037782 | 2.673077  |
| O | 0.042153  | -3.417429 | 1.666154  |
| H | -1.638889 | -3.613499 | 1.534144  |
| O | -2.624426 | -3.68876  | 1.524449  |
| C | -3.095476 | -4.029455 | 0.27084   |
| H | -4.185282 | -4.094896 | 0.306816  |
| C | -2.585821 | -5.412315 | -0.147358 |
| C | -2.757406 | -2.941904 | -0.753646 |
| F | -1.254406 | -5.44647  | -0.235669 |
| F | -3.083261 | -5.799697 | -1.3227   |
| F | -2.949817 | -6.315503 | 0.762613  |
| F | -1.436872 | -2.779109 | -0.891761 |
| F | -3.26219  | -3.203329 | -1.958524 |
| F | -3.259422 | -1.77512  | -0.348292 |

### <sup>3</sup>TS<sub>E-e</sub>

E(UM062X) = -1649.50953185

E(UωB97XD) = -1649.72011057

Charge = 0    Multiplicity = 3

|   |          |           |          |
|---|----------|-----------|----------|
| C | 0.787081 | -3.339719 | 4.831594 |
| H | 0.80766  | -4.210739 | 4.17256  |
| H | -0.16709 | -2.836661 | 4.673194 |
| C | 1.921868 | -2.435972 | 4.452714 |
| C | 1.801885 | -1.705677 | 3.142867 |
| H | 0.959443 | -1.017058 | 3.269673 |
| H | 1.490145 | -2.420786 | 2.373059 |
| O | 3.982811 | 1.250097  | 4.327519 |
| O | 1.635122 | 0.758152  | 5.082083 |
| S | 2.682871 | 1.793526  | 5.093856 |

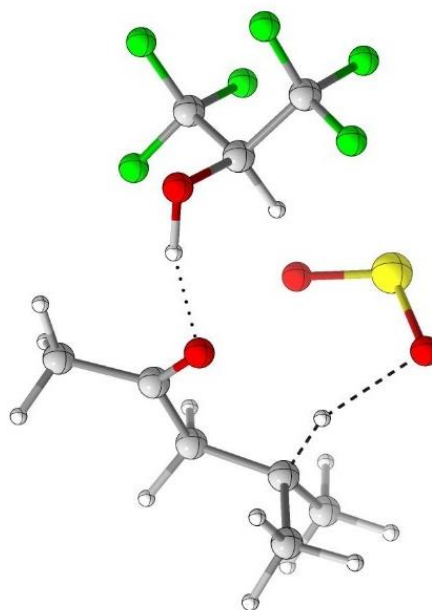

[Go back to table of contents](#)

|   |          |           |          |
|---|----------|-----------|----------|
| H | 3.426901 | -0.423809 | 3.608057 |
| H | 0.877047 | -3.664232 | 5.865177 |
| C | 3.050012 | -0.952783 | 2.707416 |
| C | 4.155545 | -1.895299 | 2.251023 |
| H | 3.836366 | -2.428935 | 1.35124  |
| H | 5.062455 | -1.340511 | 2.007963 |
| H | 4.396613 | -2.629515 | 3.019367 |
| C | 2.718112 | 0.084722  | 1.646256 |
| H | 3.610299 | 0.638572  | 1.352027 |
| H | 2.312793 | -0.402458 | 0.755547 |
| H | 1.974073 | 0.796336  | 2.009535 |
| O | 2.892232 | -2.290608 | 5.173427 |
| H | 2.855024 | -2.598129 | 6.90658  |
| O | 2.753806 | -2.343156 | 7.84664  |
| C | 2.554507 | -0.971179 | 7.870375 |
| H | 2.791273 | -0.496131 | 6.913895 |
| C | 3.488652 | -0.370504 | 8.917841 |
| C | 1.079123 | -0.674266 | 8.143208 |
| F | 3.332031 | 0.950935  | 9.027533 |
| F | 4.755258 | -0.598142 | 8.569011 |
| F | 3.302438 | -0.903825 | 10.12512 |
| F | 0.335384 | -1.240707 | 7.189604 |
| F | 0.670701 | -1.16659  | 9.313544 |
| F | 0.816359 | 0.63335   | 8.138082 |

### <sup>3</sup>TS<sub>E-f</sub>

E(UM062X) = -1649.50795891

E(UωB97XD) = -1649.71967844

Charge = 0    Multiplicity = 3

[Go back to table of contents](#)



|   |           |           |           |
|---|-----------|-----------|-----------|
| C | -0.122892 | -0.975731 | 1.833875  |
| H | 0.08798   | -0.302043 | 0.999854  |
| H | 0.230016  | -0.486311 | 2.741813  |
| C | 2.885515  | -3.404323 | 1.256949  |
| H | -1.193684 | -1.15779  | 1.888546  |
| C | 0.627974  | -2.252577 | 1.604999  |
| C | 2.119043  | -2.216411 | 1.814811  |
| H | 2.261749  | -2.138228 | 2.899521  |
| H | 2.50485   | -1.278819 | 1.399771  |
| O | 1.550751  | -4.983368 | 3.139859  |
| O | 0.929486  | -6.355081 | 1.103477  |
| S | 0.584791  | -6.080373 | 2.506537  |
| H | 2.388922  | -4.325213 | 1.642984  |
| C | 2.820554  | -3.469569 | -0.263023 |
| H | 3.309407  | -2.587174 | -0.686751 |
| H | 3.339466  | -4.353714 | -0.6337   |
| H | 1.791521  | -3.499841 | -0.619983 |
| C | 4.317509  | -3.418156 | 1.769181  |
| H | 4.857774  | -4.284337 | 1.386519  |
| H | 4.842822  | -2.518642 | 1.436728  |
| H | 4.347963  | -3.444708 | 2.859365  |
| O | 0.06419   | -3.279021 | 1.27527   |
| H | -1.602395 | -3.394756 | 1.001287  |
| O | -2.584963 | -3.472348 | 0.924152  |
| C | -2.994258 | -3.424678 | -0.394764 |
| H | -4.08055  | -3.531632 | -0.433939 |
| C | -2.409562 | -4.592345 | -1.195766 |
| C | -2.664895 | -2.062754 | -1.013624 |
| F | -1.078209 | -4.529107 | -1.270724 |

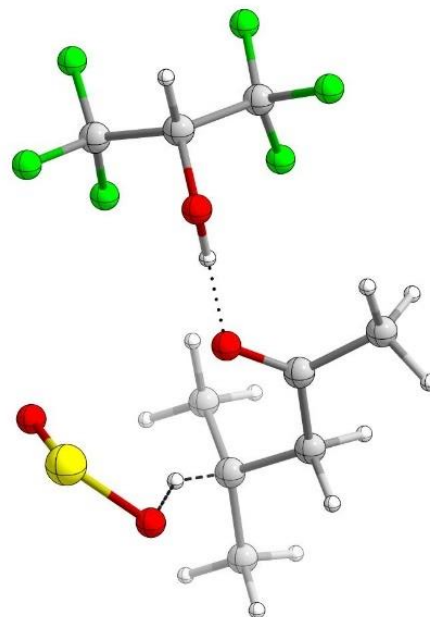

|   |           |           |           |
|---|-----------|-----------|-----------|
| F | -2.886706 | -4.637525 | -2.440582 |
| F | -2.723126 | -5.743103 | -0.601515 |
| F | -1.352368 | -1.807954 | -0.985149 |
| F | -3.07031  | -1.965145 | -2.279147 |
| F | -3.269633 | -1.09887  | -0.318482 |

### $^3\text{TS}_{E-g}$

E(UM062X) = -1649.50663740

E(U $\omega$ B97XD) = -1649.71824760

Charge = 0    Multiplicity = 3

|   |          |           |          |
|---|----------|-----------|----------|
| C | 1.123674 | -2.84441  | 5.241846 |
| H | 0.19223  | -3.352949 | 4.981346 |
| H | 0.876864 | -1.788223 | 5.371712 |
| C | 2.079885 | -2.992411 | 4.104925 |
| C | 1.709764 | -2.391067 | 2.769878 |
| H | 0.679756 | -2.026904 | 2.78601  |
| H | 1.78731  | -3.174579 | 2.012423 |
| O | 5.333011 | -1.310544 | 2.415038 |
| O | 7.207578 | -1.503628 | 3.892099 |
| S | 5.77936  | -1.866584 | 3.861234 |
| H | 3.693433 | -1.644375 | 2.394221 |
| H | 1.53721  | -3.258993 | 6.15657  |
| C | 2.637167 | -1.227299 | 2.405831 |
| C | 2.38827  | -0.731295 | 0.994059 |
| H | 1.383214 | -0.306312 | 0.924042 |
| H | 3.104629 | 0.047001  | 0.730211 |
| H | 2.46881  | -1.542602 | 0.270312 |
| C | 2.60617  | -0.109409 | 3.433671 |
| H | 3.288275 | 0.691402  | 3.148525 |

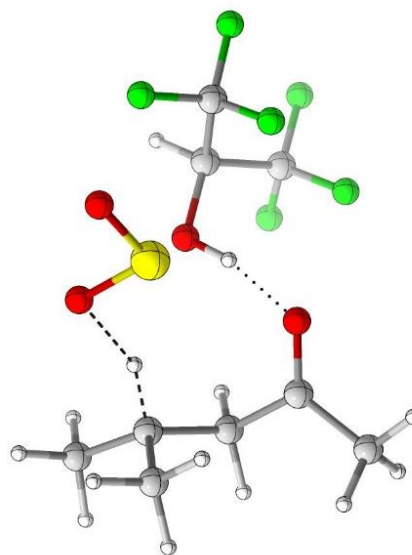

|   |          |           |          |
|---|----------|-----------|----------|
| H | 1.59717  | 0.306818  | 3.498773 |
| H | 2.89385  | -0.457643 | 4.428438 |
| O | 3.146369 | -3.56726  | 4.237353 |
| H | 3.933608 | -4.055639 | 2.75699  |
| O | 4.239699 | -4.185861 | 1.829325 |
| C | 4.851962 | -5.415602 | 1.663912 |
| H | 5.167517 | -5.516943 | 0.623641 |
| C | 3.861383 | -6.549684 | 1.940843 |
| C | 6.115906 | -5.501493 | 2.524054 |
| F | 4.393654 | -7.752631 | 1.731033 |
| F | 2.80746  | -6.426204 | 1.133985 |
| F | 3.408581 | -6.513333 | 3.197116 |
| F | 6.957535 | -4.527839 | 2.176068 |
| F | 5.838143 | -5.345796 | 3.821758 |
| F | 6.754747 | -6.661097 | 2.37814  |

### <sup>3</sup>TS<sub>E-h</sub>

E(UM062X) = -1649.50351536

E(UωB97XD) = -1649.71754825

Charge = 0    Multiplicity = 3

|   |              |               |               |
|---|--------------|---------------|---------------|
| C | 0.9049682523 | -4.0393777948 | 3.9534030515  |
| H | 0.0035849665 | -3.9158957342 | 3.3529708084  |
| H | 0.6813109183 | -3.663590579  | 4.9544426014  |
| C | 2.0277612253 | -3.2228059949 | 3.3842503564  |
| C | 1.6830615667 | -1.8072352552 | 2.9900336611  |
| H | 1.0584931775 | -1.3982375158 | 3.7898480141  |
| H | 1.0238245374 | -1.8888962733 | 2.1180148358  |
| O | 2.2429627575 | 1.8608040957  | 2.0460789937  |
| O | 1.9527792499 | 3.0661414198  | -0.0126345775 |

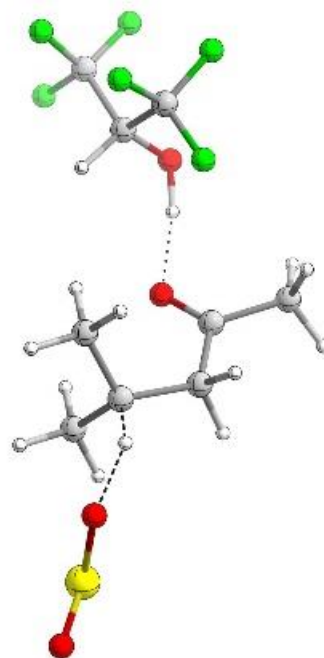

|   |              |               |              |
|---|--------------|---------------|--------------|
| S | 2.1418165333 | 1.6777748233  | 0.4413752937 |
| H | 2.3684077449 | 0.1172716928  | 2.5258382859 |
| H | 1.1803643282 | -5.08923023   | 4.0145534853 |
| C | 2.8533195203 | -0.8753489548 | 2.6934643465 |
| C | 3.7779622228 | -0.6787169334 | 3.8873063833 |
| H | 4.3339777005 | -1.5956560972 | 4.0889087806 |
| H | 4.4970738024 | 0.1154242786  | 3.683959991  |
| H | 3.2160018442 | -0.4117848389 | 4.7836169121 |
| C | 3.6117480057 | -1.2322732776 | 1.4230290973 |
| H | 4.3462424676 | -0.4599344594 | 1.1869799782 |
| H | 4.1417914434 | -2.1756125229 | 1.5535981948 |
| H | 2.9371146083 | -1.3367009294 | 0.5708202517 |
| O | 3.1483481594 | -3.6785314749 | 3.2578002891 |
| H | 3.6305299021 | -5.1092359217 | 4.1170237867 |
| O | 4.0478494875 | -5.6898060725 | 4.7890220708 |
| C | 4.9125345213 | -4.9062701494 | 5.5353310937 |
| H | 5.3096571594 | -4.0527510226 | 4.9761740997 |
| C | 6.1046093326 | -5.7793452559 | 5.9207734363 |
| C | 4.1854829692 | -4.3313579759 | 6.7553781525 |
| F | 6.9436904161 | -5.1405368093 | 6.738659884  |
| F | 6.7849117068 | -6.1183310828 | 4.8256988706 |
| F | 5.7273133807 | -6.9056823354 | 6.5234467571 |
| F | 3.0937194564 | -3.6758943054 | 6.3476314364 |
| F | 3.7888635746 | -5.2773998136 | 7.6057649093 |
| F | 4.9429350613 | -3.4651007    | 7.4291694682 |

### <sup>3</sup>T<sub>SE-i</sub>

E(UM062X) = -1649.50916111

E(U<sub>ω</sub>B97XD) = -1649.71867427

[Go back to table of contents](#)

Charge = 0    Multiplicity = 3

|   |           |           |          |
|---|-----------|-----------|----------|
| C | 0.838141  | -3.486918 | 5.250749 |
| H | -0.121252 | -2.970403 | 5.232852 |
| H | 1.378646  | -3.143667 | 6.136449 |
| C | 1.660432  | -3.123744 | 4.051393 |
| C | 1.672284  | -1.669105 | 3.660587 |
| H | 1.828437  | -1.102459 | 4.581986 |
| H | 0.658476  | -1.41979  | 3.3228   |
| O | 5.139767  | -2.846697 | 3.352174 |
| O | 3.995035  | -2.174337 | 5.499994 |
| S | 5.139257  | -2.920745 | 4.953721 |
| H | 3.594386  | -1.920489 | 2.773604 |
| H | 0.697428  | -4.562857 | 5.306631 |
| C | 2.693504  | -1.29484  | 2.595321 |
| C | 2.186081  | -1.606652 | 1.192448 |
| H | 1.376376  | -0.915856 | 0.940863 |
| H | 2.976693  | -1.487061 | 0.451338 |
| H | 1.793268  | -2.620779 | 1.11486  |
| C | 3.124599  | 0.158786  | 2.724768 |
| H | 3.854634  | 0.417143  | 1.956853 |
| H | 2.261051  | 0.818569  | 2.605774 |
| H | 3.567132  | 0.349737  | 3.703455 |
| O | 2.301149  | -3.969687 | 3.455131 |
| H | 3.198196  | -4.12184  | 1.953331 |
| O | 3.708494  | -4.434189 | 1.177089 |
| C | 4.520412  | -5.480588 | 1.579456 |
| H | 4.798757  | -5.427692 | 2.636863 |
| C | 5.813118  | -5.39359  | 0.769352 |
| C | 3.796651  | -6.816934 | 1.37825  |

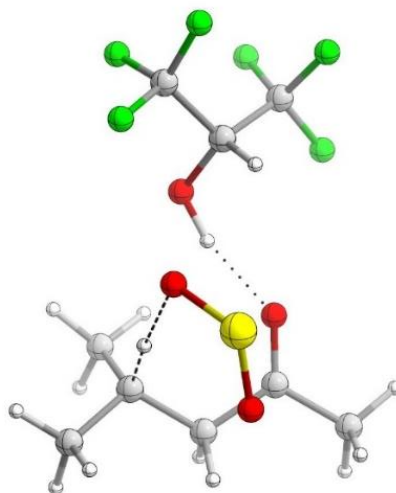

|   |          |           |           |
|---|----------|-----------|-----------|
| F | 6.604839 | -6.447244 | 0.98429   |
| F | 6.49298  | -4.300554 | 1.113684  |
| F | 5.578262 | -5.322489 | -0.540128 |
| F | 2.615887 | -6.778037 | 1.996098  |
| F | 3.568104 | -7.082275 | 0.090988  |
| F | 4.484639 | -7.84043  | 1.888914  |

### $^3\text{TS}_{E-j}$

E(UM062X) = -1649.50653562

E(UωB97XD) = -1649.71836451

Charge = 0    Multiplicity = 3

|   |          |           |          |
|---|----------|-----------|----------|
| C | 0.958483 | -1.941386 | 1.215581 |
| H | 1.920284 | -2.345155 | 0.89774  |
| H | 0.898696 | -0.915103 | 0.842433 |
| C | 0.884997 | -1.8835   | 2.711021 |
| C | 2.115761 | -1.418034 | 3.438521 |
| H | 1.816984 | -0.925063 | 4.366274 |
| H | 2.660432 | -0.709679 | 2.812554 |
| O | 3.714035 | -4.828264 | 2.149493 |
| O | 1.188616 | -4.80654  | 2.151313 |
| S | 2.36685  | -5.641441 | 1.863743 |
| H | 3.156046 | -3.202676 | 2.852255 |
| H | 0.143768 | -2.52742  | 0.799545 |
| C | 3.034436 | -2.60512  | 3.785884 |
| C | 4.420181 | -2.116924 | 4.179317 |
| H | 4.352128 | -1.492462 | 5.074025 |
| H | 5.073453 | -2.960668 | 4.404772 |
| H | 4.876257 | -1.526123 | 3.38467  |
| C | 2.432905 | -3.508236 | 4.851462 |

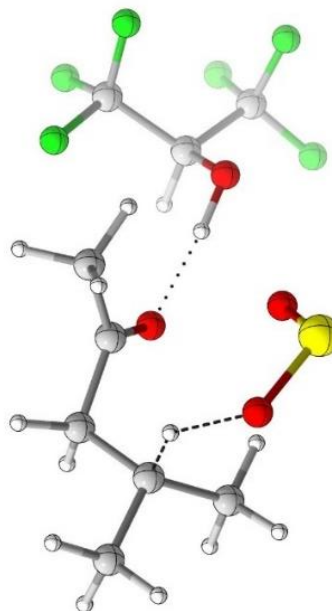

|   |           |           |          |
|---|-----------|-----------|----------|
| H | 3.073102  | -4.376076 | 5.017915 |
| H | 2.353847  | -2.960535 | 5.794085 |
| H | 1.439917  | -3.858124 | 4.573252 |
| O | -0.118414 | -2.197633 | 3.326714 |
| H | -1.345052 | -3.013071 | 2.511672 |
| O | -2.149664 | -3.3742   | 2.068263 |
| C | -3.194923 | -2.497839 | 2.299382 |
| H | -3.083982 | -1.926953 | 3.227399 |
| C | -4.468875 | -3.328147 | 2.438466 |
| C | -3.279377 | -1.473266 | 1.16397  |
| F | -5.552106 | -2.560218 | 2.576352 |
| F | -4.383161 | -4.103776 | 3.519334 |
| F | -4.666487 | -4.124072 | 1.388213 |
| F | -2.10472  | -0.845531 | 1.054999 |
| F | -3.541854 | -2.038486 | -0.01439 |
| F | -4.210421 | -0.544588 | 1.388268 |

### <sup>3</sup>TS<sub>E-k</sub>

E(UM062X) = -1649.50461564

E(UωB97XD) = -1649.71632146

Charge = 0    Multiplicity = 3

|   |              |               |              |
|---|--------------|---------------|--------------|
| C | 1.1929546991 | -4.2279146359 | 4.0914042726 |
| H | 1.758441373  | -4.9565454967 | 4.676449245  |
| H | 0.680690476  | -4.7364689738 | 3.2785045608 |
| C | 2.1501277363 | -3.1986087825 | 3.5645658968 |
| C | 2.7329700077 | -2.2525579261 | 4.5815765316 |
| H | 2.9903987526 | -2.8504292541 | 5.4613249973 |
| H | 1.9093285292 | -1.605128178  | 4.9041347001 |
| O | 4.9108820195 | 0.8831500494  | 5.6673109074 |

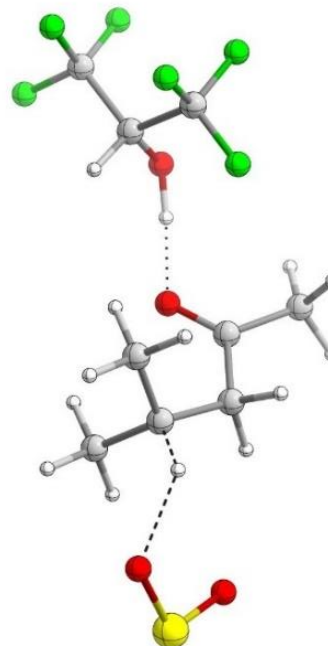

O 2.4507099529 0.704506259 6.1482552964  
S 3.580701649 1.6460862965 6.160941636  
H 4.2272670577 -0.868740187 5.0606675297  
H 0.4720819294 -3.7633717977 4.7646095596  
C 3.9238932875 -1.4051287434 4.1411638841  
C 5.1215253231 -2.2467914695 3.7157203986  
H 4.9096195935 -2.7684787808 2.781120156  
H 5.9947375846 -1.6123373729 3.5574859553  
H 5.3726838776 -2.989810387 4.4747805434  
C 3.560785253 -0.3522266969 3.1008588897  
H 4.4092191397 0.3103135497 2.9226279708  
H 3.2891044524 -0.8224766471 2.1563898013  
H 2.7182702024 0.2546989346 3.4384248418  
O 2.4347933211 -3.1418214408 2.3821061785  
H 2.0613582468 -4.4250897461 1.3133620666  
O 2.1327348971 -5.2130691103 0.7289352268  
C 3.4792287847 -5.4937980071 0.570502623  
H 4.1172094806 -4.6076645138 0.6551654915  
C 3.6693806277 -6.0456456946 -0.8404896742  
C 3.9443236733 -6.4719555488 1.6538696171  
F 4.9262114004 -6.4401552087 -1.0551706722  
F 3.3837674503 -5.0989756643 -1.7345512999  
F 2.8702944877 -7.0831759956 -1.0853642034  
F 3.6599220136 -5.9609063659 2.856222602  
F 3.3365942438 -7.6547612066 1.5685231689  
F 5.2604304767 -6.6832992574 1.610843301



### <sup>3</sup>TS<sub>E</sub>-1

E(UM062X) = -1649.50450382

E(UωB97XD) = -1649.71611375

Charge = 0    Multiplicity = 3

|   |          |           |          |
|---|----------|-----------|----------|
| C | 1.07018  | -4.00069  | 3.882734 |
| H | 0.439109 | -4.179747 | 3.009102 |
| H | 0.448892 | -3.520592 | 4.638387 |
| C | 2.195483 | -3.095628 | 3.470227 |
| C | 1.826842 | -1.662038 | 3.193413 |
| H | 1.405983 | -1.275092 | 4.128507 |
| H | 0.990309 | -1.675882 | 2.487072 |
| O | 2.414628 | 1.818882  | 1.361852 |
| O | 0.456207 | 0.333055  | 0.843734 |
| S | 1.179478 | 1.522914  | 0.369534 |
| H | 2.427803 | 0.23651   | 2.556625 |
| H | 1.451095 | -4.949351 | 4.252831 |
| C | 2.931772 | -0.740128 | 2.686318 |
| C | 4.04627  | -0.518851 | 3.702782 |
| H | 4.626742 | -1.431681 | 3.840062 |
| H | 4.72219  | 0.264796  | 3.35694  |
| H | 3.643385 | -0.217409 | 4.671336 |
| C | 3.47045  | -1.159848 | 1.323658 |
| H | 4.153632 | -0.40234  | 0.936644 |
| H | 4.014109 | -2.101574 | 1.399501 |
| H | 2.658372 | -1.287103 | 0.605021 |
| O | 3.334737 | -3.510856 | 3.358686 |
| H | 3.800329 | -4.981669 | 4.089607 |
| O | 4.157801 | -5.653163 | 4.713745 |
| C | 4.906275 | -4.98552  | 5.668353 |

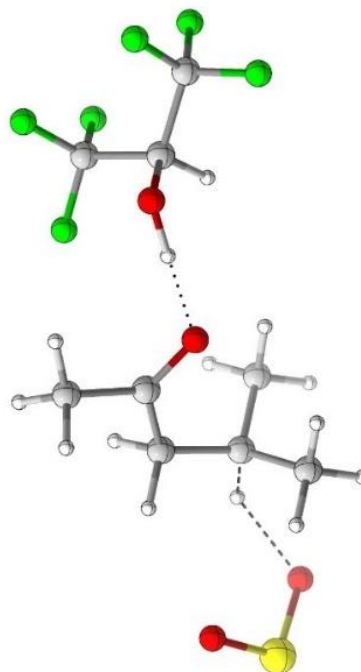

|   |          |           |          |
|---|----------|-----------|----------|
| H | 5.341181 | -4.050485 | 5.299424 |
| C | 6.068808 | -5.896637 | 6.056432 |
| C | 4.024065 | -4.615062 | 6.864864 |
| F | 6.792354 | -5.384175 | 7.054012 |
| F | 6.879337 | -6.060044 | 5.01079  |
| F | 5.65316  | -7.104566 | 6.434648 |
| F | 2.98216  | -3.895628 | 6.434563 |
| F | 3.538322 | -5.686234 | 7.491028 |
| F | 4.676164 | -3.875642 | 7.762814 |

## S7

E(UM062X) = - 1100.31821699

E(UωB97XD) = -1100.47697294

Charge = 0    Multiplicity = 2

|   |               |               |               |
|---|---------------|---------------|---------------|
| C | 0.4150871609  | 0.0848117913  | 1.6689860752  |
| H | 0.9327107089  | 0.7149473808  | 2.3957480539  |
| H | -0.4848422713 | -0.2930369207 | 2.1559944953  |
| C | 2.824135152   | -2.9384410592 | 2.1434461992  |
| H | 1.9332156406  | -4.6111557017 | 3.3403646507  |
| C | 1.3165218216  | -1.0556983358 | 1.3073008084  |
| O | 1.8075569161  | -1.1621264438 | 0.1980469421  |
| C | 1.5784767493  | -2.0839708369 | 2.3756069037  |
| H | 0.6790861991  | -2.7111623888 | 2.4056088449  |
| H | 1.623138554   | -1.5829103946 | 3.3470380527  |
| H | 0.1554172231  | 0.6754404291  | 0.794085583   |
| C | 2.8467388016  | -4.0926436131 | 3.0827307102  |
| H | 3.7871570023  | -4.5471361772 | 3.3618164607  |
| H | 2.7653276765  | -3.3147260427 | 1.1122306301  |
| H | 1.7701137303  | 0.1178073744  | -0.9432299759 |

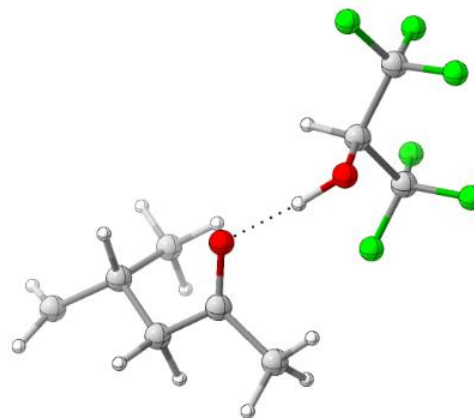

|   |              |               |               |
|---|--------------|---------------|---------------|
| O | 2.0342174035 | 0.8730543054  | -1.5148315334 |
| C | 3.4007929684 | 1.0429170129  | -1.370565959  |
| H | 3.9254780963 | 0.1148384495  | -1.1200261444 |
| C | 3.6916819902 | 2.0297012987  | -0.2355505162 |
| C | 3.9495417824 | 1.5157696679  | -2.7145847161 |
| F | 4.9959911411 | 2.1292628453  | 0.0240125116  |
| F | 3.09284711   | 1.6009032148  | 0.8805076351  |
| F | 3.2302355618 | 3.2532788018  | -0.4914983595 |
| F | 3.7997944477 | 0.5528552809  | -3.6243149431 |
| F | 3.3126329977 | 2.5956768649  | -3.1648736459 |
| F | 5.2497371728 | 1.8091807281  | -2.6446296886 |
| C | 4.0976131167 | -2.1004495868 | 2.2641139843  |
| H | 4.9794325655 | -2.7125898922 | 2.0724167935  |
| H | 4.0968695444 | -1.2737301267 | 1.5530483593  |
| H | 4.1832238313 | -1.6895335704 | 3.2726377459  |

## S8

E(UM062X) = - 1100.32736150

E(UωB97XD) = -1100.48751997

Charge = 0    Multiplicity = 2

|   |           |          |           |
|---|-----------|----------|-----------|
| C | -1.663422 | 1.309711 | 1.257473  |
| H | -1.337692 | 0.557841 | 0.53533   |
| H | -2.625039 | 1.691392 | 0.912652  |
| C | 1.961221  | 3.510947 | -0.279283 |
| H | 2.691328  | 4.23293  | -0.650135 |
| C | -0.649684 | 2.413747 | 1.281381  |
| O | 0.080236  | 2.599417 | 2.2368    |
| C | -0.560575 | 3.293529 | 0.046971  |
| H | -1.484501 | 3.883847 | 0.03351   |

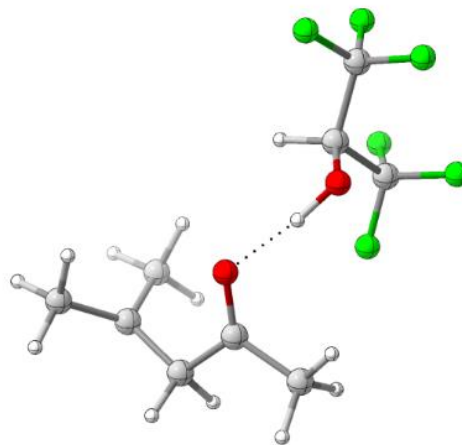

|   |           |           |           |
|---|-----------|-----------|-----------|
| H | -0.616633 | 2.625939  | -0.820092 |
| H | -1.766119 | 0.851092  | 2.237828  |
| C | 0.649519  | 4.159955  | -0.00077  |
| C | 0.632659  | 5.473803  | 0.699376  |
| H | 0.855618  | 5.354686  | 1.769095  |
| H | 1.387812  | 6.14879   | 0.291005  |
| H | -0.342678 | 5.958224  | 0.626108  |
| H | 2.385925  | 3.068794  | 0.633937  |
| H | 1.866033  | 2.705469  | -1.010362 |
| H | 0.322739  | 1.384553  | 3.442602  |
| O | 0.754295  | 0.666107  | 3.954457  |
| C | 2.049013  | 0.543531  | 3.478154  |
| H | 2.44049   | 1.474873  | 3.056162  |
| C | 2.102445  | -0.499562 | 2.357474  |
| C | 2.942053  | 0.179791  | 4.661968  |
| F | 3.302868  | -0.55484  | 1.779042  |
| F | 1.216924  | -0.172089 | 1.41082   |
| F | 1.796536  | -1.724356 | 2.784196  |
| F | 2.975268  | 1.193585  | 5.527074  |
| F | 2.496264  | -0.891466 | 5.316386  |
| F | 4.196514  | -0.068864 | 4.279848  |

## SO<sub>2</sub>H

E(UM062X) = -549.209143949

E(UωB97XD) = -549.261521364

Charge = 0    Multiplicity = 2

|   |               |              |               |
|---|---------------|--------------|---------------|
| S | -1.9080698452 | 1.1053614603 | -0.0267748944 |
|---|---------------|--------------|---------------|

|   |               |              |               |
|---|---------------|--------------|---------------|
| O | -2.9980775717 | 0.2109803957 | -0.4168286342 |
|---|---------------|--------------|---------------|

|   |               |              |              |
|---|---------------|--------------|--------------|
| O | -2.5381737664 | 2.0132529492 | 1.1623489409 |
|---|---------------|--------------|--------------|

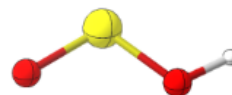

[Go back to table of contents](#)

H -1.8598639567 2.6086942349 1.5182013976

### S3

E(RM062X) = -859.711177280

E(RωB97XD) = -859.831939516

Charge = 0 Multiplicity = 1

H 3.3935483758 -1.2158849262 -0.5485490049

C 2.4731063914 -1.7087437913 -0.236354015

H 1.968694364 -2.0707490169 -1.1363561951

H 2.6843372617 -2.5469820759 0.4220160645

C 0.3017921244 1.5183280311 0.260200098

H 0.1022346466 1.3095862457 1.3140687153

C 1.5371950381 -0.7422861613 0.4189384828

O 0.9060075142 -1.048646827 1.4134278385

C 1.4573714352 0.6305969944 -0.1984785499

H 1.4819251062 0.5272243522 -1.2860993808

H 2.4088361597 1.1038179573 0.0754675157

C 0.6942775749 2.992116518 0.1387067573

H 0.9446269027 3.2381527478 -0.8955644828

H -0.1207743457 3.6428466662 0.4560189446

C -0.9872922074 1.3087049357 -0.5343422872

H -1.7768916637 1.9612274612 -0.1557805276

H -0.837663779 1.5395844227 -1.5927257275

H 1.5650508962 3.2057980171 0.7592088072

S -1.7246269554 -0.3383081582 -0.5507130234

O -1.7380199849 -0.6364416055 1.0311616313

H -0.8109090923 -0.695954538 1.3669455033

O -0.7229576342 -1.2204536463 -1.1883459222

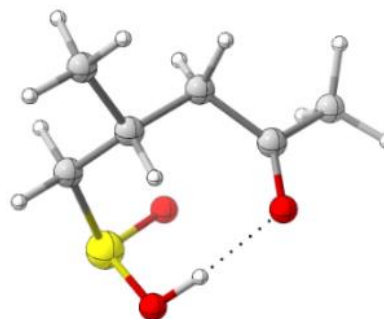

## S5

E(RM062X) = -859.705889738

E(RωB97XD) = -859.825465705

Charge = 0    Multiplicity = 1

|   |               |               |              |
|---|---------------|---------------|--------------|
| H | -1.1672758244 | -0.0231226252 | 5.289411996  |
| C | -0.5435794253 | -0.0937553808 | 4.4024529234 |
| H | -1.177385825  | -0.1155820456 | 3.512952534  |
| H | 0.1017665696  | 0.780873236   | 4.3179397393 |
| C | 2.0896062658  | -2.7841656081 | 3.2782444767 |
| C | 0.2732194824  | -1.3574279915 | 4.441366452  |
| O | 0.0535069126  | -2.2346175149 | 5.2424908591 |
| C | 1.3811729761  | -1.4380211089 | 3.4080288912 |
| H | 2.0993198314  | -0.6540651484 | 3.6709798261 |
| H | 0.9517130311  | -1.1328972899 | 2.4471484533 |
| C | 2.8759904883  | -3.1856667103 | 4.5177443799 |
| H | 3.5684609304  | -3.9950394386 | 4.2802950065 |
| H | 3.4307065748  | -2.3443849392 | 4.9378506716 |
| C | 1.141572227   | -3.8939916861 | 2.8265145745 |
| H | 0.37444496397 | -4.0403070158 | 3.5845925616 |
| H | 0.6525445374  | -3.6392250735 | 1.8831213788 |
| H | 1.6873296191  | -4.8277507259 | 2.6947478853 |
| H | 2.1848390746  | -3.5354733547 | 5.2818330192 |
| S | 3.2542417581  | -2.5890780566 | 1.859352967  |
| O | 4.2530154482  | -1.4705549559 | 2.4783024496 |
| H | 4.7333885656  | -1.8324981718 | 3.2425805202 |
| O | 4.0013593512  | -3.8546845921 | 1.7850029729 |

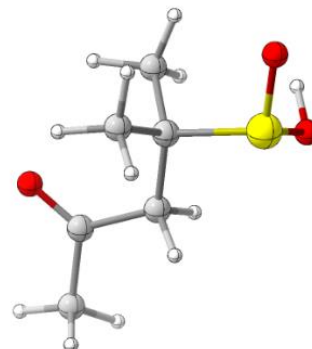

## HFIP

E(RM062X) = -789.904885443

E(R $\omega$ B97XD) = -789.989591603

Charge = 0    Multiplicity = 1

|   |               |               |              |
|---|---------------|---------------|--------------|
| O | -1.3112772363 | -3.2907727311 | 2.3981557222 |
| H | -1.0767821938 | -2.3575823951 | 2.4515772235 |
| C | -2.2264097643 | -3.6072255418 | 3.3967023894 |
| H | -2.0718357292 | -3.0479666967 | 4.323211754  |
| C | -2.016863591  | -5.0841719646 | 3.7257713412 |
| C | -3.6509138606 | -3.3040984255 | 2.9205125955 |
| F | -3.7143163825 | -2.0320368421 | 2.5205376432 |
| F | -4.0159148319 | -4.0686042334 | 1.8928309674 |
| F | -4.5452208695 | -3.4677927063 | 3.8944132275 |
| F | -2.9394999187 | -5.5297119254 | 4.5785768255 |
| F | -0.8221852528 | -5.2520313798 | 4.2910886331 |
| F | -2.0592458892 | -5.8497678284 | 2.6379405874 |

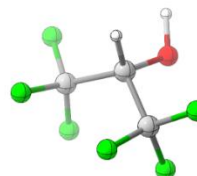

## 6.3 - $\omega$ B97XD / def2-QZVPP / PCM (MeCN) // M06-2X (D3) / def2-TZVP / PCM (MeCN)

### CH<sub>4</sub>

E(RM062X) = -40.5004994644

E(R $\omega$ B97XD) = -40.5240597367

Charge = 0    Multiplicity = 1

|   |               |               |               |
|---|---------------|---------------|---------------|
| C | -0.2540747666 | -1.2025152009 | -1.4398748672 |
| H | 0.1771153762  | -2.1980732892 | -1.3587031746 |
| H | -0.7996074611 | -1.1182340561 | -2.3774159573 |
| H | 0.5405710668  | -0.4599830522 | -1.4148030627 |
| H | -0.934927682  | -1.0331983349 | -0.6082984514 |

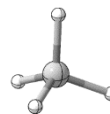

### $^3\text{SO}_2$

E(UM062X) = -548.515729039

E(U $\omega$ B97XD) = -548.568709860

Charge = 0    Multiplicity = 3

S -1.7771947109 0.5024332492 0.1501252313

O -3.2521948165 0.4295704429 -0.005898272

O -1.0684347926 0.8367246977 1.4114935108

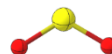

### $^3\text{TS}_A$

E(UM062X) = -589.011318541

E(U $\omega$ B97XD) = -589.086213660

Charge = 0    Multiplicity = 3

C -0.2883949416 -1.2356595123 -1.4385474145

H 0.1836749894 -2.2100165979 -1.3546616668

H -0.7988462631 -1.1099285308 -2.3902742945

S 2.4153985926 0.3467629148 0.1555457261

O 1.7304610084 -0.6920180903 0.9412589035

O 1.7667020911 0.5523133581 -1.2755355676

H 0.5359813328 -0.4600898781 -1.4214245145

H -0.9410128098 -1.0317516635 -0.5949701716

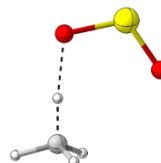

### $\text{SO}_2\text{H}$

E(UM062X) = -549.209711301

E(U $\omega$ B97XD) = -549.262032453

Charge = 0    Multiplicity = 2

S -1.9174051363 1.1275553917 -0.0478551701

O -2.9875794151 0.1924352164 -0.3964449601

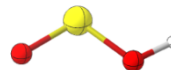



O -2.5541825277 2.0464715889 1.1283244614  
H -1.9019211709 2.6993685703 1.4273430826

### CH<sub>3</sub>

E(UM062X) = -39.8246896962

E(UωB97XD) = -39.8432636321

Charge = 0 Multiplicity = 2

C -0.08576695 -1.2479759174 -1.6509235425  
H 0.1318792184 -2.2355521669 -1.2781662931  
H -0.8907148261 -1.1021166059 -2.3526505839  
H 0.5021339133 -0.4064219321 -1.3226459226

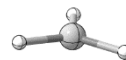

### S9

E(RM062X) = -589.133206909

E(RωB97XD) = -589.200337064

Charge = 0 Multiplicity = 1

C -2.0482241751 1.1059234148 0.2555061273  
H -3.1143385332 1.1638162838 0.4659242626  
H -1.4874685976 1.6869505776 0.9879468058  
S -1.7911108656 1.8417903883 -1.3532255123  
O -2.0592422499 3.2761150115 -1.1560283392  
O -0.1863223312 1.6326339764 -1.4489477223  
H 0.2665445541 2.0388056042 -0.690919508  
H -1.7200186416 0.0691657234 0.2303744761

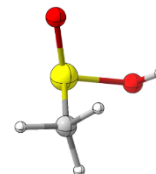

### <sup>3</sup>TS<sub>F</sub>

E(UM062X) = -1137.67966292

E(UωB97XD) = -1137.79651614

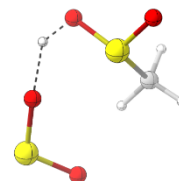

Charge = 0    Multiplicity = 3

|   |               |               |               |
|---|---------------|---------------|---------------|
| H | 0.8662161432  | -1.3127933645 | 0.7783433391  |
| C | 0.1907474945  | -0.4709439731 | 0.6508881291  |
| H | -0.8476069705 | -0.7922494453 | 0.6332155159  |
| H | 0.3653706581  | 0.3463509561  | 1.3495309339  |
| S | 0.5268247601  | 0.1961966211  | -0.969833399  |
| O | -0.3966984575 | 1.2654204767  | -1.2659595309 |
| O | 1.9796882948  | 0.7369722322  | -0.8978328612 |
| H | 2.5042433696  | -0.0320106046 | -1.2947160386 |
| O | 2.1051820911  | -1.4651122847 | -1.9859958587 |
| S | 2.1822761533  | -2.9220906841 | -1.4951956431 |
| O | 1.0376227721  | -3.2221996523 | -0.5903127669 |

## S10

E(UM062X) = -588.497977733

E(U $\omega$ B97XD) = -588.566696490

Charge = 0    Multiplicity = 2

|   |               |              |               |
|---|---------------|--------------|---------------|
| C | -2.033298176  | 1.1173907702 | 0.3026272415  |
| H | -3.103865252  | 1.2110031069 | 0.4559635007  |
| H | -1.4681907545 | 1.686938365  | 1.0389780916  |
| S | -1.6526361935 | 1.8577778132 | -1.2898178466 |
| O | -2.1849438337 | 3.2097899849 | -1.2929313155 |
| O | -0.2402847406 | 1.6448203306 | -1.5558747542 |
| H | -1.7135845697 | 0.0806961491 | 0.2634527124  |

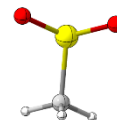

## TS<sub>F</sub>

E(RM062X) = -1137.71921397

E(R $\omega$ B97XD) = -1137.82950979

Charge = 0    Multiplicity = 1

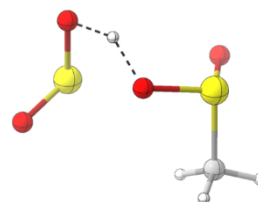

[Go back to table of contents](#)

|   |               |              |               |
|---|---------------|--------------|---------------|
| C | -1.6586125907 | 1.1408907846 | -0.694297586  |
| H | -2.622450931  | 1.4494082172 | -0.294620203  |
| H | -0.8588269408 | 1.7608846073 | -0.2908266609 |
| S | -1.7225077788 | 1.4056031396 | -2.459944396  |
| O | -1.7614652192 | 2.8667492329 | -2.640696999  |
| O | -0.2165890329 | 0.9151423302 | -2.7602927333 |
| H | 0.4104539499  | 1.2446109014 | -3.8251719617 |
| O | 1.4370151894  | 1.8098087871 | -3.9874390212 |
| S | 1.5373526221  | 2.0371443903 | -2.4893657764 |
| O | 2.486428333   | 1.1682766558 | -1.8785936041 |
| H | -1.4833070109 | 0.0850525237 | -0.5007575884 |

## SO<sub>2</sub>

E(RM062X) = -548.632512189

E(RωB97XD) = -548.682296368

Charge = 0    Multiplicity = 1

|   |               |              |              |
|---|---------------|--------------|--------------|
| S | -1.7564509587 | 0.4953428241 | 0.1201496794 |
| O | -3.1818278908 | 0.448165955  | 0.0614813155 |
| O | -1.1595454707 | 0.8252196109 | 1.3740894752 |

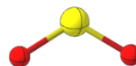

## SO<sub>2</sub><sup>-</sup>

E(UM062X) = -548.763947284

E(UωB97XD) = -548.815572380

Charge = -1    Multiplicity = 2

|   |               |              |              |
|---|---------------|--------------|--------------|
| S | -1.7198910084 | 0.4828715721 | 0.0674194235 |
| O | -3.2252314949 | 0.4497181366 | 0.0715427339 |
| O | -1.1527018167 | 0.8361386812 | 1.4167583127 |

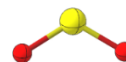

#### 6.4 - Orca 4.2.1 DLPNO-CCSD(T) single point calculations

DLPNO-CCSD(T) provided single point energy corrections to the Gaussian 16 M06-2X (D3) / def2-TZVP/ PCM (MeCN)-optimized geometries used for the calculation of the  $\Delta G$  and  $\Delta G^\ddagger$  of the HAT pathway shown in Figure 4, given the near-barrierless character of the pathway and the superior performance of DLPNO-CCSD(T) with a variety of systems.<sup>45</sup> The correlation-consistent cc-pVTZ<sup>21</sup> basis set was used in conjunction with the cc-pVTZ/C correlation fitting set and the “tightPNO” keyword controlled the DLPNO parameter thresholds.<sup>46</sup> Geometries and images for the corresponding structures are provided in **Section 7.3**.

**DLPNO-CCSD(T) / cc-pVTZ // M06-2X (D3) / def2-TZVP/ PCM (MeCN)**

##### **CH<sub>4</sub>**

E(RM062X) = -40.5004994644

E(RCCSD(T)) = -40.438111043064

##### **<sup>3</sup>SO<sub>2</sub>**

E(UM062X) = -548.516248402

E(UCCSD(T)) = -547.856468017090

##### **<sup>3</sup>TS<sub>A</sub>**

E(UM062X) = -589.011318541

E(UCCSD(T)) = -588.285127209269

##### **SO<sub>2</sub>H**

E(UM062X) = -549.209711301

E(UCCSD(T)) = -548.541418606207

### **CH<sub>3</sub>**

$$E(\text{UM062X}) = -39.8246896962$$

$$E(\text{UCCSD(T)}) = -39.760983929895$$

### **S9**

$$E(\text{RM062X}) = -589.133206909$$

$$E(\text{RCCSD(T)}) = -588.394051194904$$

### **<sup>3</sup>TS<sub>F</sub>**

$$E(\text{UM062X}) = -1137.67966292$$

$$E(\text{UCCSD(T)}) = -1136.269694320248$$

### **S10**

$$E(\text{UM062X}) = -588.497977733$$

$$E(\text{UCCSD(T)}) = -587.755438032247$$

### **TS<sub>F</sub>**

$$E(\text{RM062X}) = -1137.71921397$$

$$E(\text{RCCSD(T)}) = -1136.316265247819$$

### **SO<sub>2</sub>**

$$E(\text{RM062X}) = -548.63171435$$

$$E(\text{RCCSD(T)}) = -547.967524722562$$

## X-Ray crystallographic data

### 1-(Allylsulfonyl)adamantan-2-one (14a)

CCDC 2091570

---

Bond precision: C-C = 0.0020 Å Wavelength = 0.71073

Cell: a = 6.8529(2) b = 9.2662(3) c = 19.1898(5)  
 $\alpha = 90$   $\beta = 90.051(2)$   $\gamma = 90$

Temperature: 98 K

|                                     | Calculated                                       | Reported                                         |
|-------------------------------------|--------------------------------------------------|--------------------------------------------------|
| Volume                              | 1218.56(6)                                       | 1218.56(6)                                       |
| Space group                         | P 21/c                                           | P 1 21/c 1                                       |
| Hall group                          | -P 2ybc                                          | -P 2ybc                                          |
| Moiety formula                      | C <sub>13</sub> H <sub>18</sub> O <sub>3</sub> S | C <sub>13</sub> H <sub>18</sub> O <sub>3</sub> S |
| Sum formula                         | C <sub>13</sub> H <sub>18</sub> O <sub>3</sub> S | C <sub>13</sub> H <sub>18</sub> O <sub>3</sub> S |
| M <sub>r</sub>                      | 254.33                                           | 254.33                                           |
| D <sub>x</sub> , g cm <sup>-3</sup> | 1.386                                            | 1.386                                            |
| Z                                   | 4                                                | 4                                                |
| Mu (mm <sup>-1</sup> )              | 0.259                                            | 0.259                                            |
| F <sub>000</sub>                    | 544.0                                            | 544.0                                            |
| F <sub>000</sub> '                  | 544.74                                           |                                                  |
| h,k,l <sub>max</sub>                | 8,12,24                                          | 8,12,24                                          |
| N <sub>ref</sub>                    | 2787                                             | 2778                                             |
| T <sub>min</sub> ,T <sub>max</sub>  | 0.911,0.982                                      | 0.883,1.000                                      |
| T <sub>min</sub> '                  | 0.911                                            |                                                  |

Correction method = # Reported T Limits: T<sub>min</sub> = 0.883 T<sub>max</sub> = 1.000

AbsCorr = MULTI-SCAN

Data completeness = 0.997 Theta(max) = 27.497

R(reflections)= 0.0405(2728) wR2(reflections)= 0.0894(2778)

S = 1.051 N<sub>par</sub>= 154

---

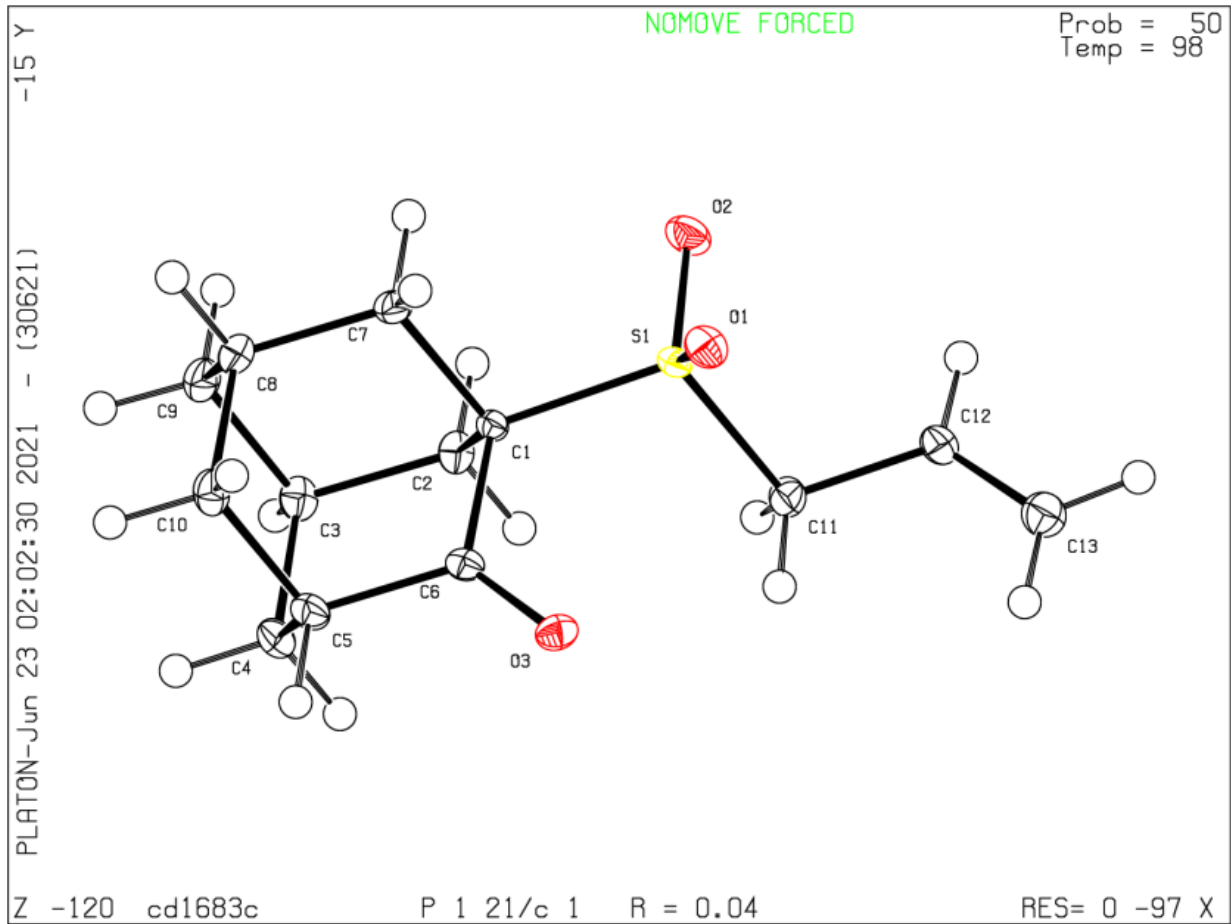

### 4-(Cyclohexylsulfonyl)morpholine (37)

CCDC 2092038

---

Bond precision: C-C = 0.0019 Å Wavelength = 0.71073

Cell: a = 11.7797(3) b = 10.1425(2) c = 9.6720(2)

$\alpha = 90$   $\beta = 96.019(2)$   $\gamma = 90$

Temperature: 98 K

|                                     | Calculated                                        | Reported                                          |
|-------------------------------------|---------------------------------------------------|---------------------------------------------------|
| Volume                              | 1149.20(4)                                        | 1149.20(4)                                        |
| Space group                         | P 21/c                                            | P 1 21/c 1                                        |
| Hall group                          | -P 2ybc                                           | -P 2ybc                                           |
| Moiety formula                      | C <sub>10</sub> H <sub>19</sub> NO <sub>3</sub> S | C <sub>10</sub> H <sub>19</sub> NO <sub>3</sub> S |
| Sum formula                         | C <sub>10</sub> H <sub>19</sub> NO <sub>3</sub> S | C <sub>10</sub> H <sub>19</sub> NO <sub>3</sub> S |
| M <sub>r</sub>                      | 233.32                                            | 233.32                                            |
| D <sub>x</sub> , g cm <sup>-3</sup> | 1.349                                             | 1.349                                             |
| Z                                   | 4                                                 | 4                                                 |
| Mu (mm <sup>-1</sup> )              | 0.270                                             | 0.270                                             |
| F000                                | 504.0                                             | 504.0                                             |
| F000'                               | 504.72                                            |                                                   |
| h,k,l <sub>max</sub>                | 15,13,12                                          | 15,13,12                                          |
| N <sub>ref</sub>                    | 2643                                              | 2642                                              |
| T <sub>min</sub> , T <sub>max</sub> | 0.907, 0.955                                      | 0.869, 1.000                                      |
| T <sub>min</sub> '                  | 0.874                                             |                                                   |

Correction method = # Reported T Limits: T<sub>min</sub> = 0.869 T<sub>max</sub> = 1.000

AbsCorr = MULTI-SCAN

Data completeness = 1.000

Theta(max) = 27.497

R(reflections) = 0.0341( 2630)

wR2(reflections) = 0.0848( 2642)

S = 1.036

N<sub>par</sub> = 136

---



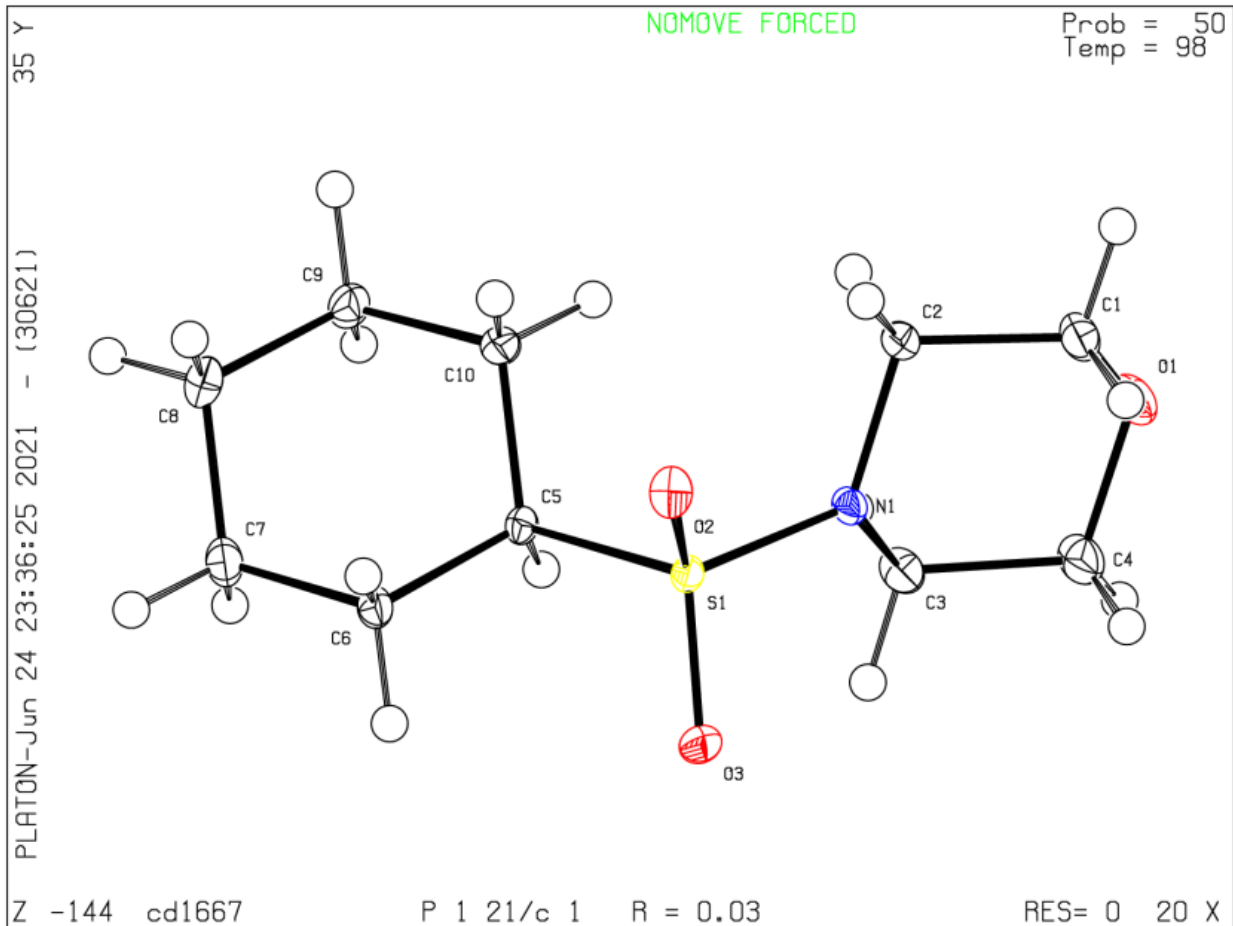

(R)-N-(1-(4-Methoxyphenyl)ethyl)cyclopentanesulfonamide (39)

CCDC 2091573

---

|                                          |                                                   |                                                   |
|------------------------------------------|---------------------------------------------------|---------------------------------------------------|
| Bond precision:                          | C-C = 0.0032 Å                                    | Wavelength = 0.71073                              |
| Cell:                                    | a = 9.1940(2)    b = 10.5230(3)    c = 15.2153(4) |                                                   |
|                                          | α = 90            β = 90            γ = 90        |                                                   |
| Temperature:                             | 98 K                                              |                                                   |
|                                          | Calculated                                        | Reported                                          |
| Volume                                   | 1472.06(7)                                        | 1472.06(7)                                        |
| Space group                              | P 21 21 21                                        | P 21 21 21                                        |
| Hall group                               | P 2ac 2ab                                         | P 2ac 2ab                                         |
| Moiety formula                           | C <sub>14</sub> H <sub>21</sub> NO <sub>3</sub> S | C <sub>14</sub> H <sub>21</sub> NO <sub>3</sub> S |
| Sum formula                              | C <sub>14</sub> H <sub>21</sub> NO <sub>3</sub> S | C <sub>14</sub> H <sub>21</sub> NO <sub>3</sub> S |
| M <sub>r</sub>                           | 283.38                                            | 283.38                                            |
| D <sub>x</sub> , g cm <sup>-3</sup>      | 1.279                                             | 1.279                                             |
| Z                                        | 4                                                 | 4                                                 |
| Mu (mm <sup>-1</sup> )                   | 0.224                                             | 0.224                                             |
| F000                                     | 608.0                                             | 608.0                                             |
| F000'                                    | 608.76                                            |                                                   |
| h,k,l <sub>max</sub>                     | 11,13,19                                          | 11,13,19                                          |
| N <sub>ref</sub>                         | 3372[ 1935]                                       | 3329                                              |
| T <sub>min</sub> ,T <sub>max</sub>       | 0.948,0.993                                       | 0.944,1.000                                       |
| T <sub>min</sub> '                       | 0.929                                             |                                                   |
| Correction method = # Reported T Limits: | T <sub>min</sub> = 0.944 T <sub>max</sub> = 1.000 |                                                   |
| AbsCorr = MULTI-SCAN                     |                                                   |                                                   |
| Data completeness = 1.72/0.99            | Theta(max) = 27.497                               |                                                   |
| R(reflections) = 0.0333(3267)            | wR2(reflections) = 0.0786(3329)                   |                                                   |
| S = 1.059                                | N <sub>par</sub> = 174                            |                                                   |

---

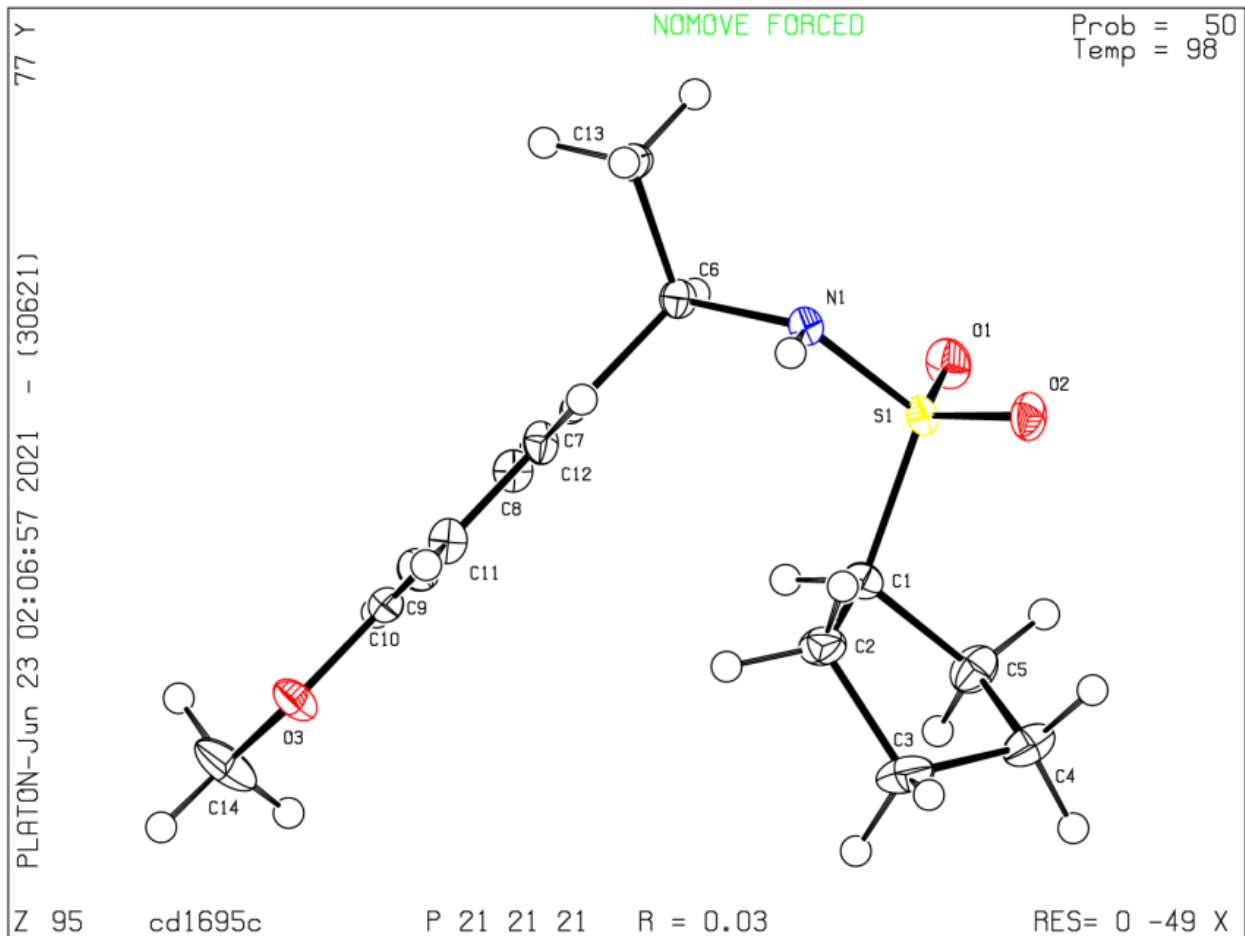

## 7-Chloro-4-(cyclohexylsulfonyl)quinoline (42)

CCDC 2091572

---

Bond precision: C-C = 0.0025 Å Wavelength = 0.71073

Cell: a = 5.5955(2) b = 10.7380(3) c = 11.8452(3)  
α = 99.357(2) β = 93.406(2) γ = 90.654(3)

Temperature: 98 K

|                                     | Calculated                                          | Reported                                            |
|-------------------------------------|-----------------------------------------------------|-----------------------------------------------------|
| Volume                              | 700.84(4)                                           | 700.84(4)                                           |
| Space group                         | P -1                                                | P -1                                                |
| Hall group                          | -P 1                                                | -P 1                                                |
| Moiety formula                      | C <sub>15</sub> H <sub>16</sub> ClNO <sub>2</sub> S | C <sub>15</sub> H <sub>16</sub> ClNO <sub>2</sub> S |
| Sum formula                         | C <sub>15</sub> H <sub>16</sub> ClNO <sub>2</sub> S | C <sub>15</sub> H <sub>16</sub> ClNO <sub>2</sub> S |
| M <sub>r</sub>                      | 309.80                                              | 309.80                                              |
| D <sub>x</sub> , g cm <sup>-3</sup> | 1.468                                               | 1.468                                               |
| Z                                   | 2                                                   | 2                                                   |
| Mu (mm <sup>-1</sup> )              | 0.422                                               | 0.422                                               |
| F000                                | 324.0                                               | 324.0                                               |
| F000'                               | 324.66                                              |                                                     |
| h,k,l <sub>max</sub>                | 7,13,15                                             | 7,13,15                                             |
| N <sub>ref</sub>                    | 3214                                                | 3213                                                |
| T <sub>min</sub> , T <sub>max</sub> | 0.890, 0.947                                        | 0.868, 1.000                                        |
| T <sub>min</sub> '                  | 0.834                                               |                                                     |

Correction method = # Reported T Limits: T<sub>min</sub> = 0.868 T<sub>max</sub> = 1.000

AbsCorr = MULTI-SCAN

Data completeness = 1.000

Theta(max) = 27.499

R(reflections) = 0.0398(3195)

wR2(reflections) = 0.0904(3213)

S = 0.998

N<sub>par</sub> = 181

---

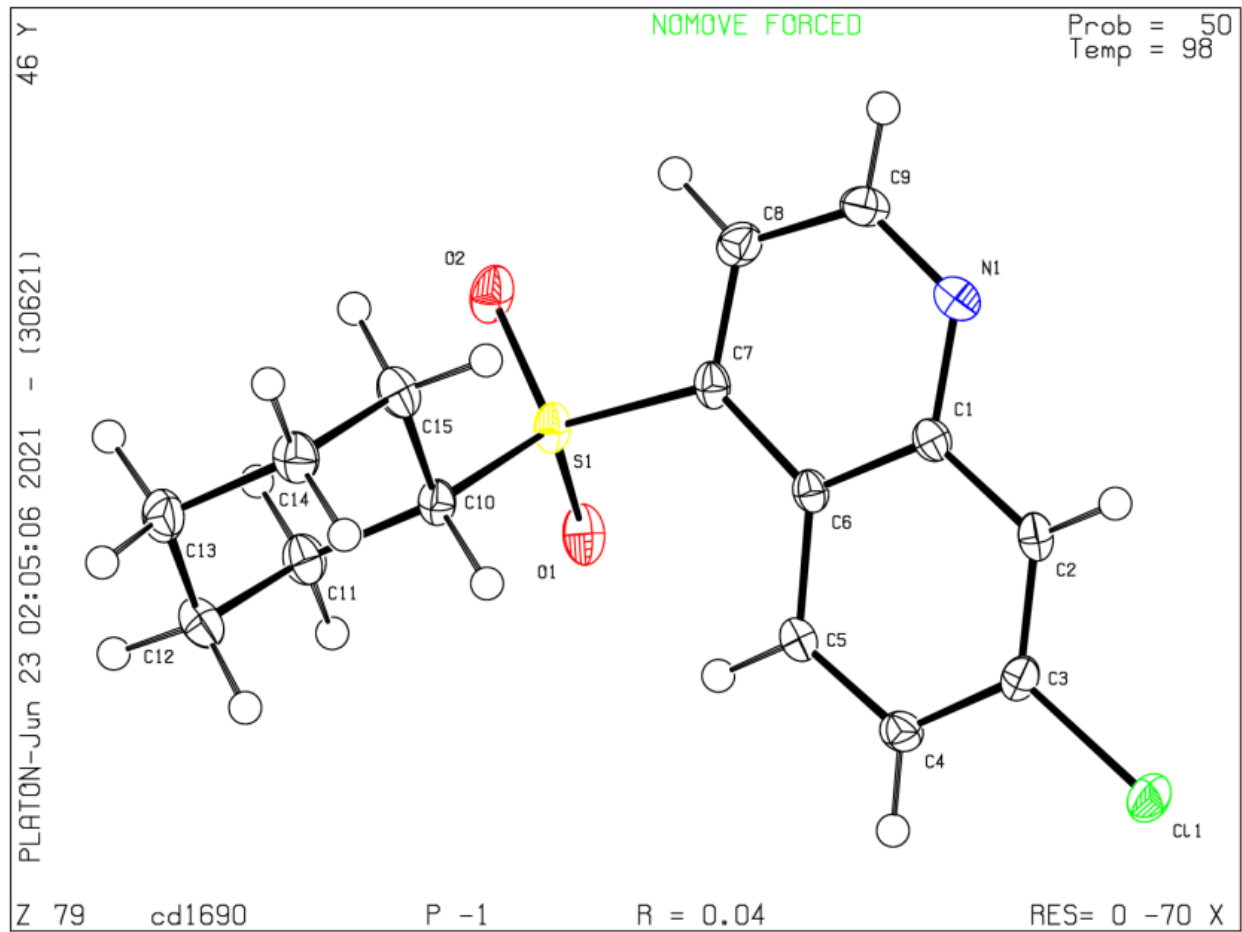

## NMR Spectra

### Sodium cyclohexanesulfinate (1)

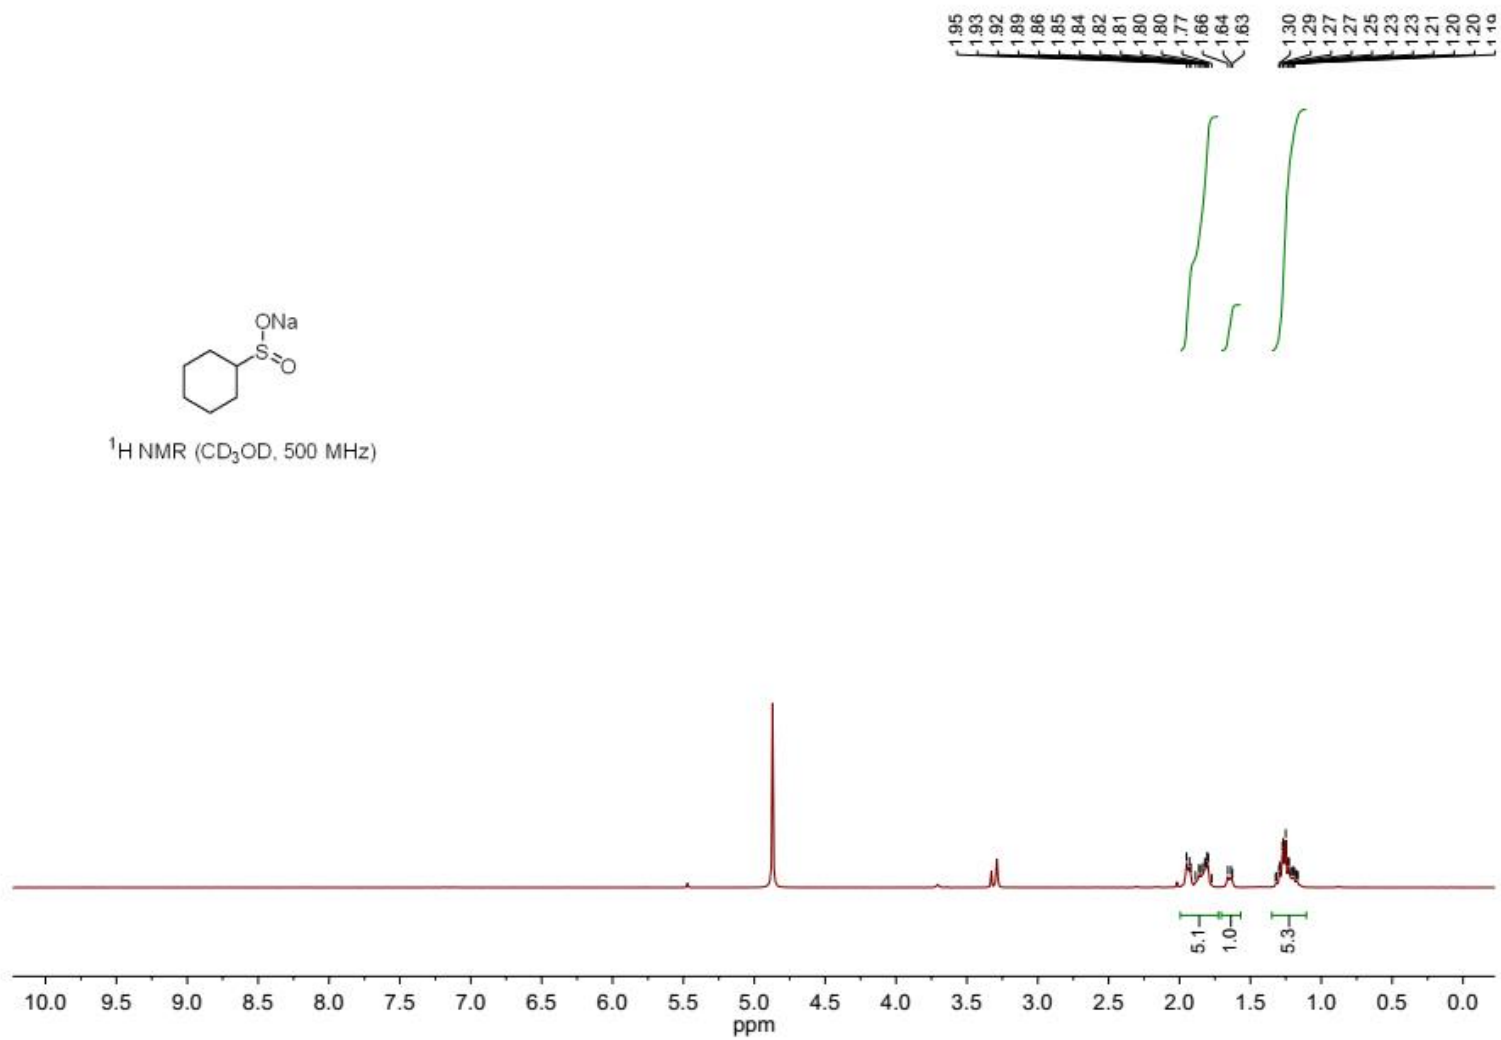

[Go back to table of contents](#)

# Sodium cyclohexanesulfinate (1)

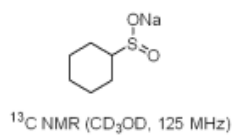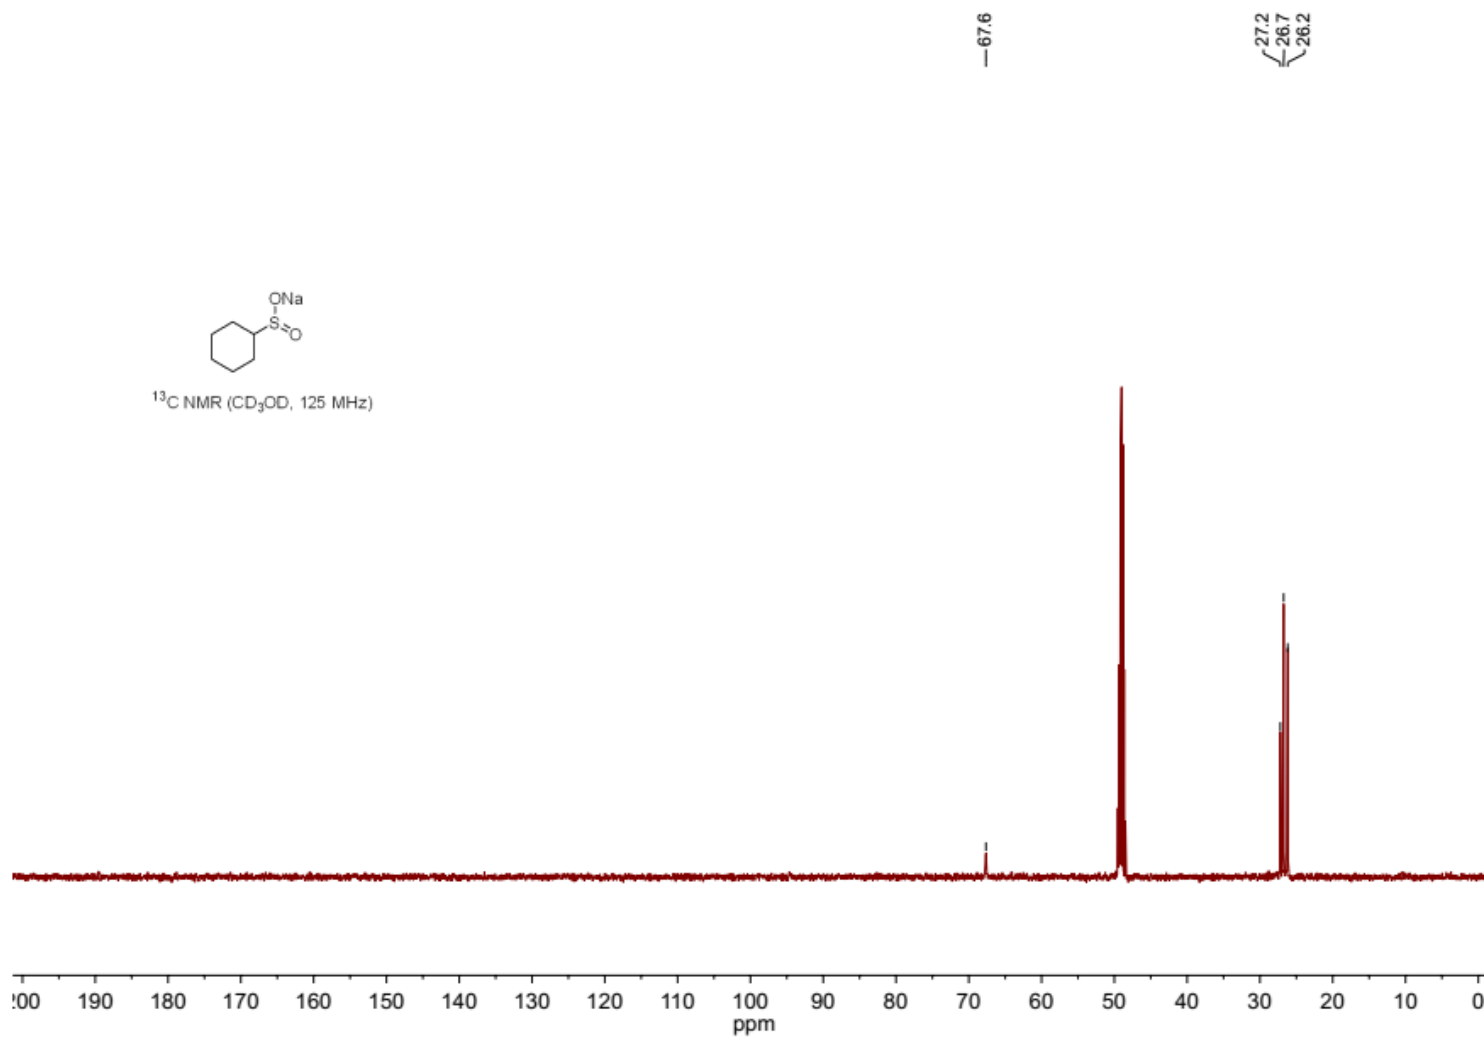

## (Methylsulfonyl)cyclopentane (2)

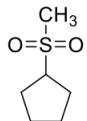

$^1\text{H}$  NMR ( $\text{C}_6\text{D}_6$ , 300 MHz)

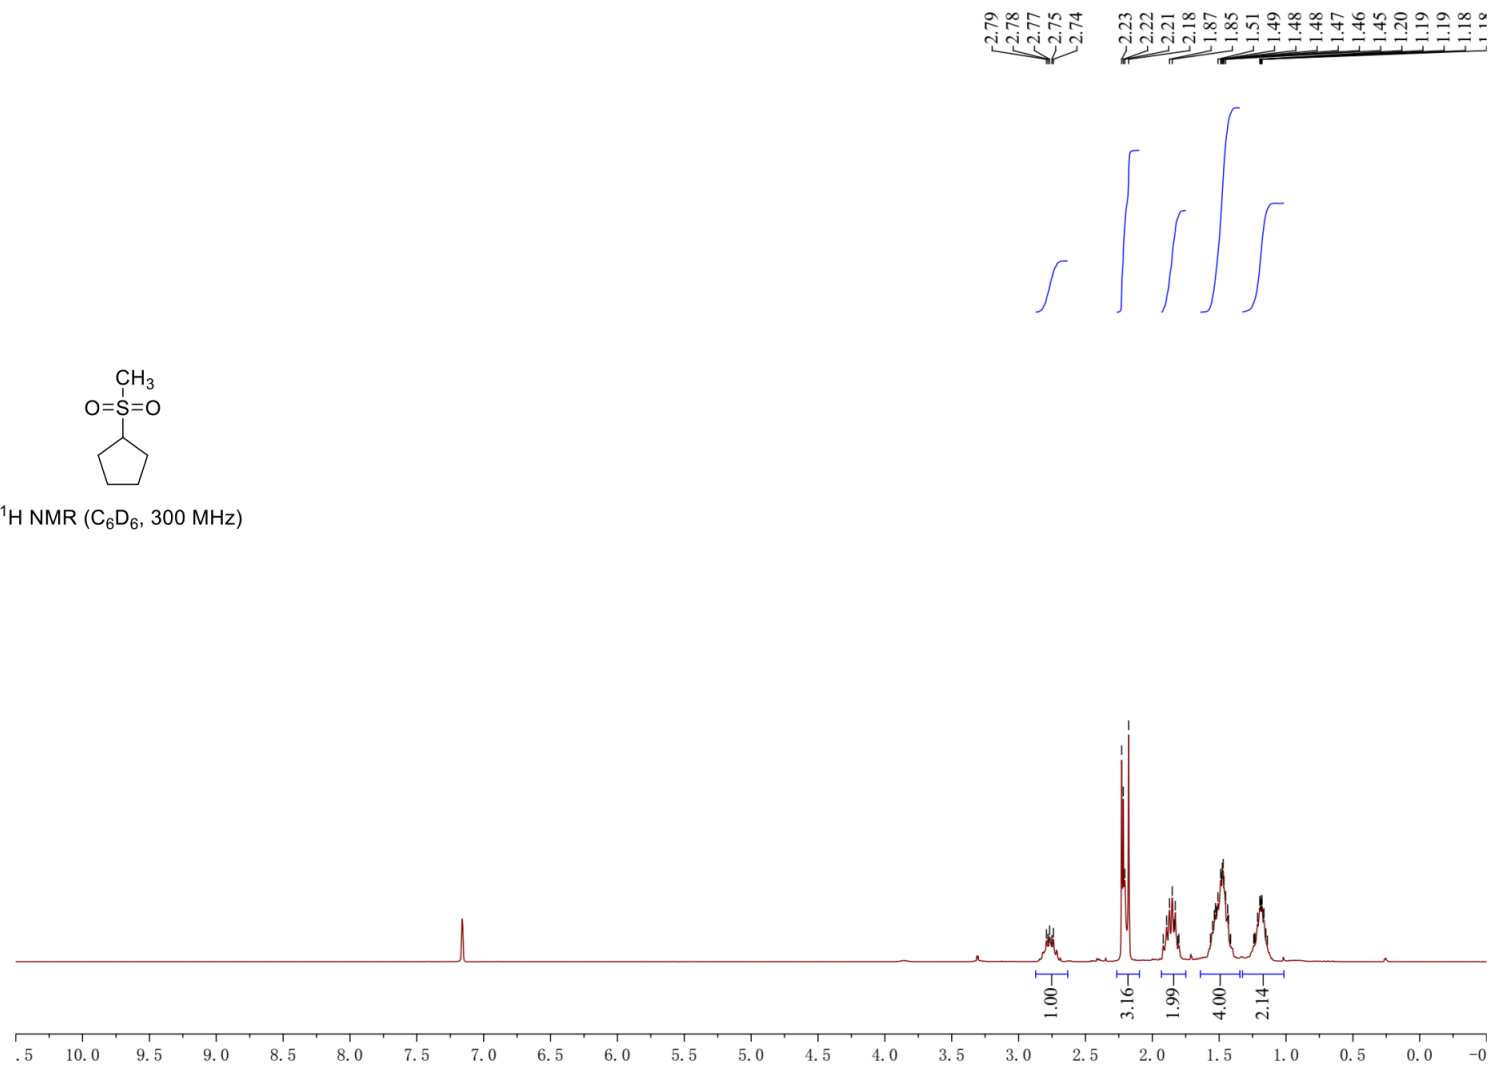

[Go back to table of contents](#)



(Methylsulfonyl)cyclopentane (2)

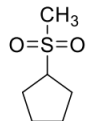

$^{13}\text{C}$  NMR ( $\text{C}_6\text{D}_6$ , 75 MHz)

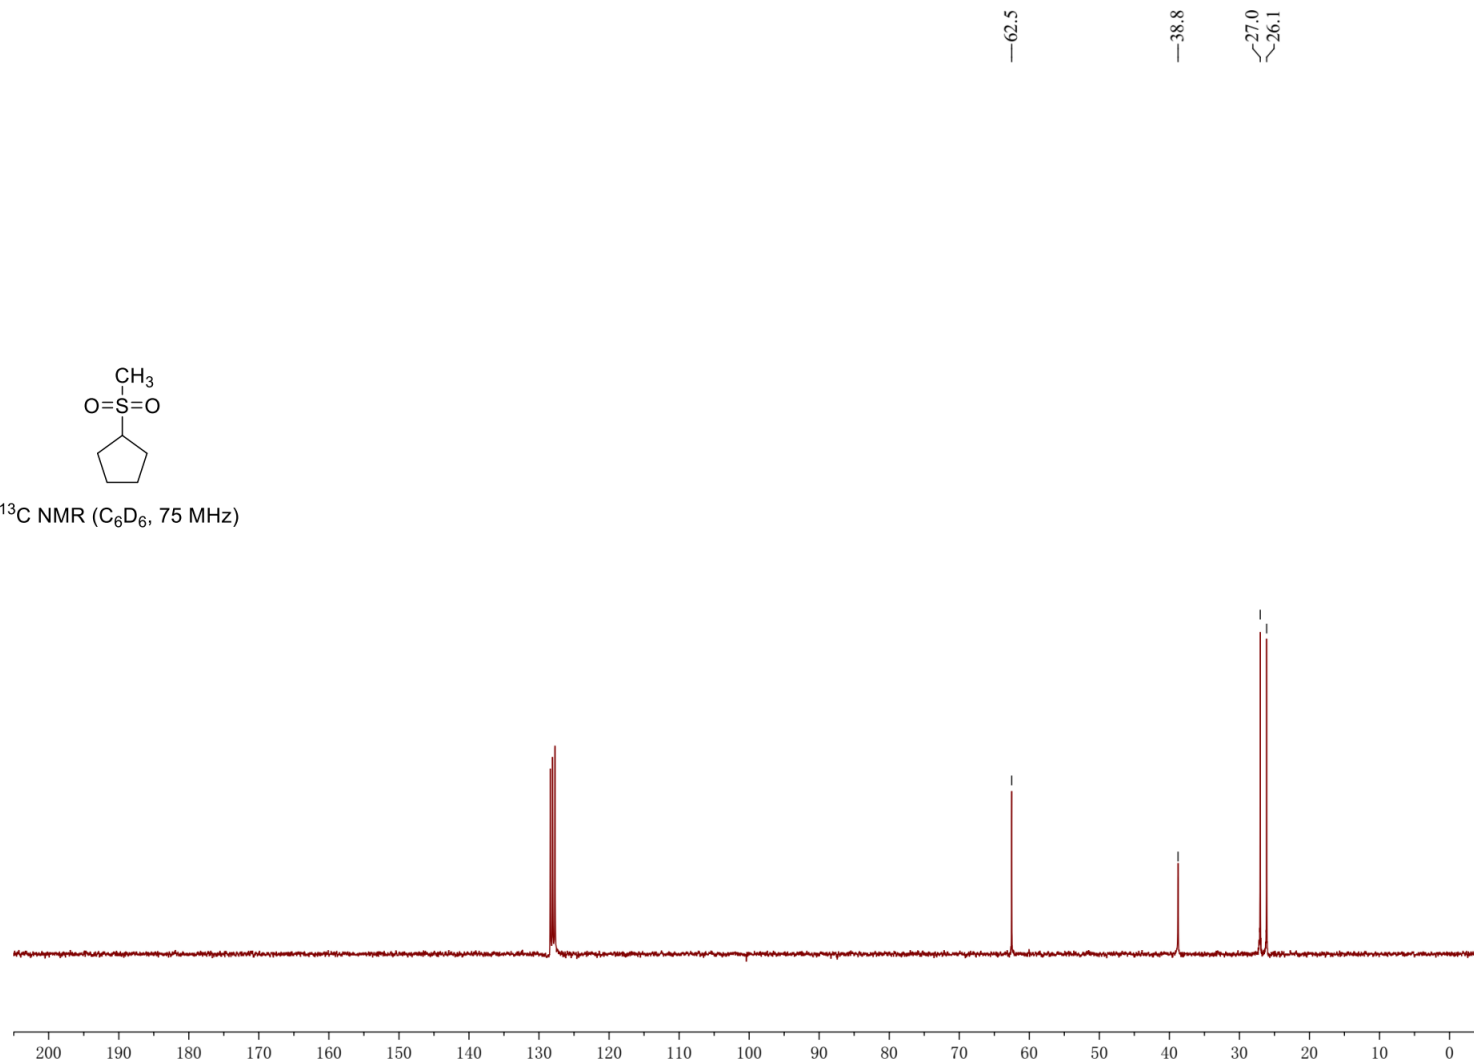

[Go back to table of contents](#)

### (Methylsulfonyl)cyclohexane (3)

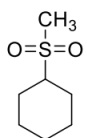

$^1\text{H}$  NMR ( $\text{CDCl}_3$ , 500 MHz)

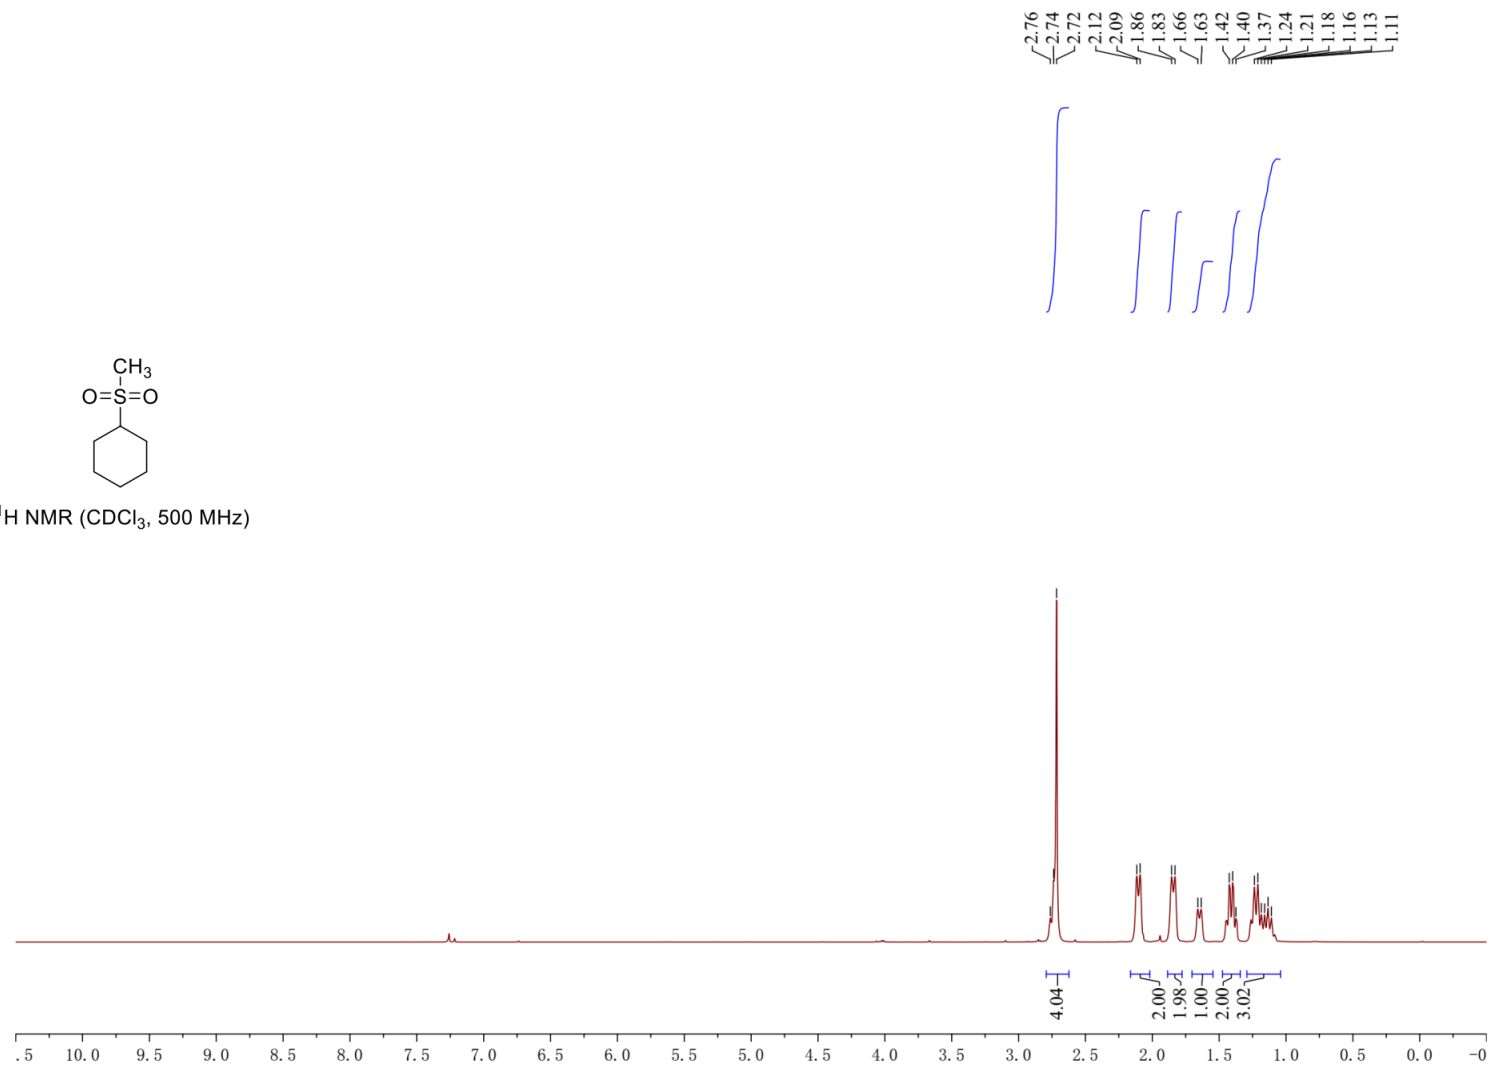

[Go back to table of contents](#)

(Methylsulfonyl)cyclohexane (3)

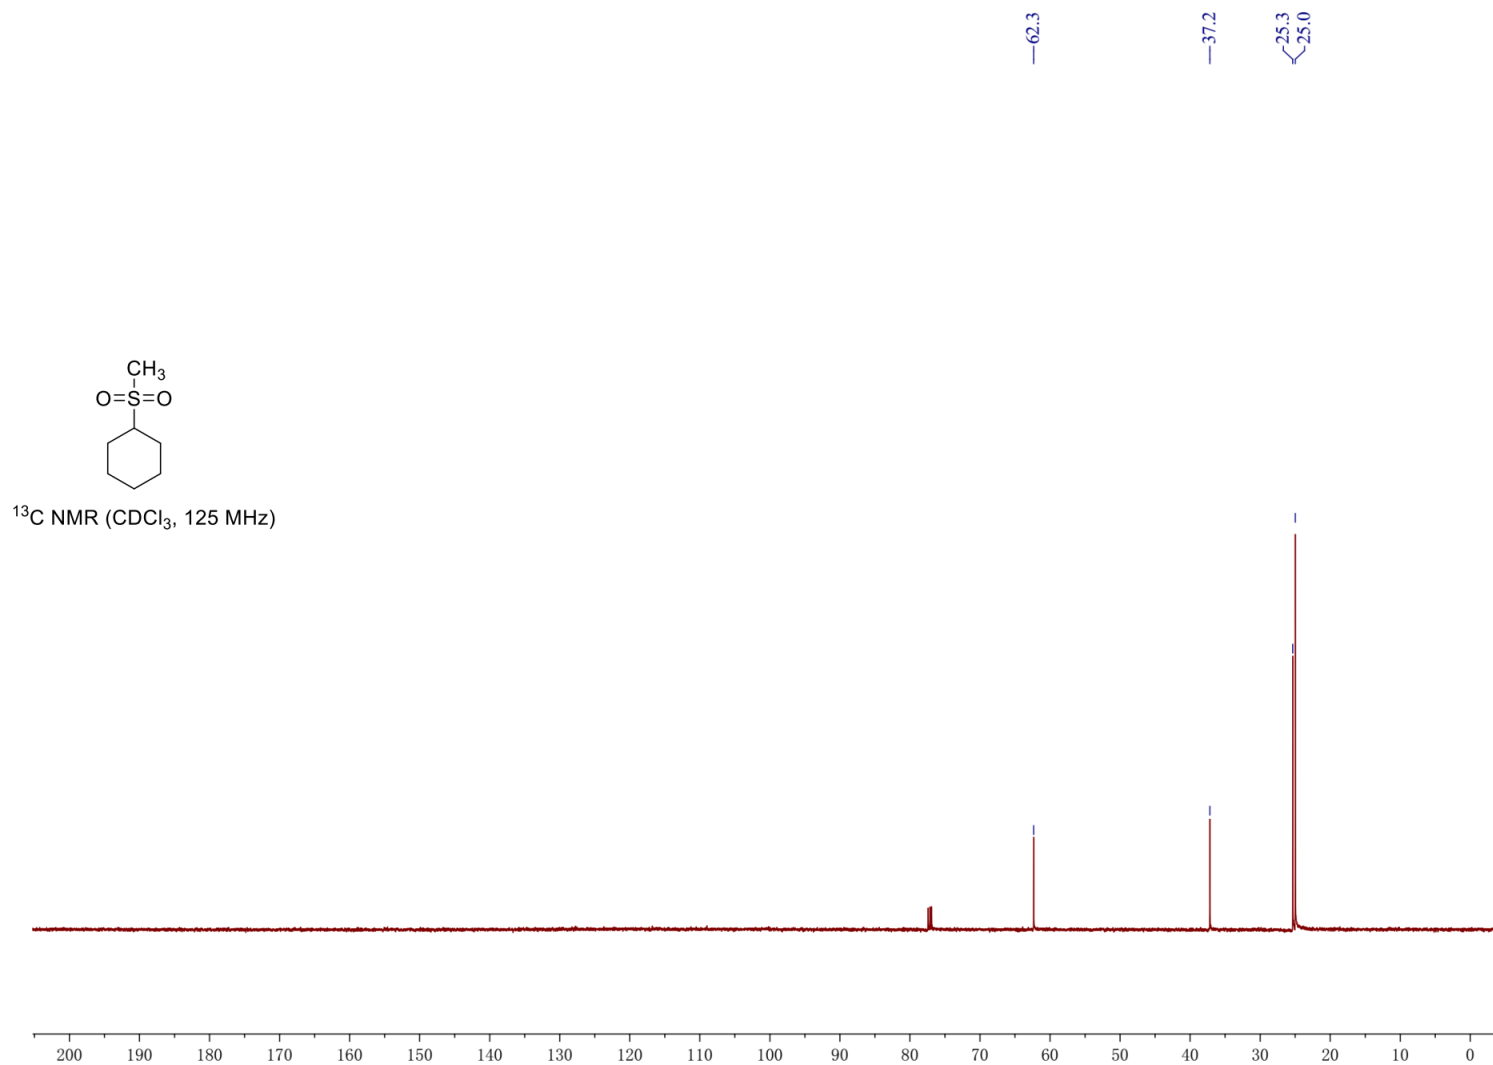

[Go back to table of contents](#)

### (Methylsulfonyl)cycloheptane (4)

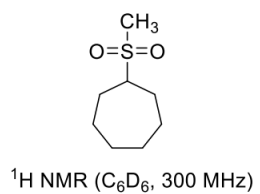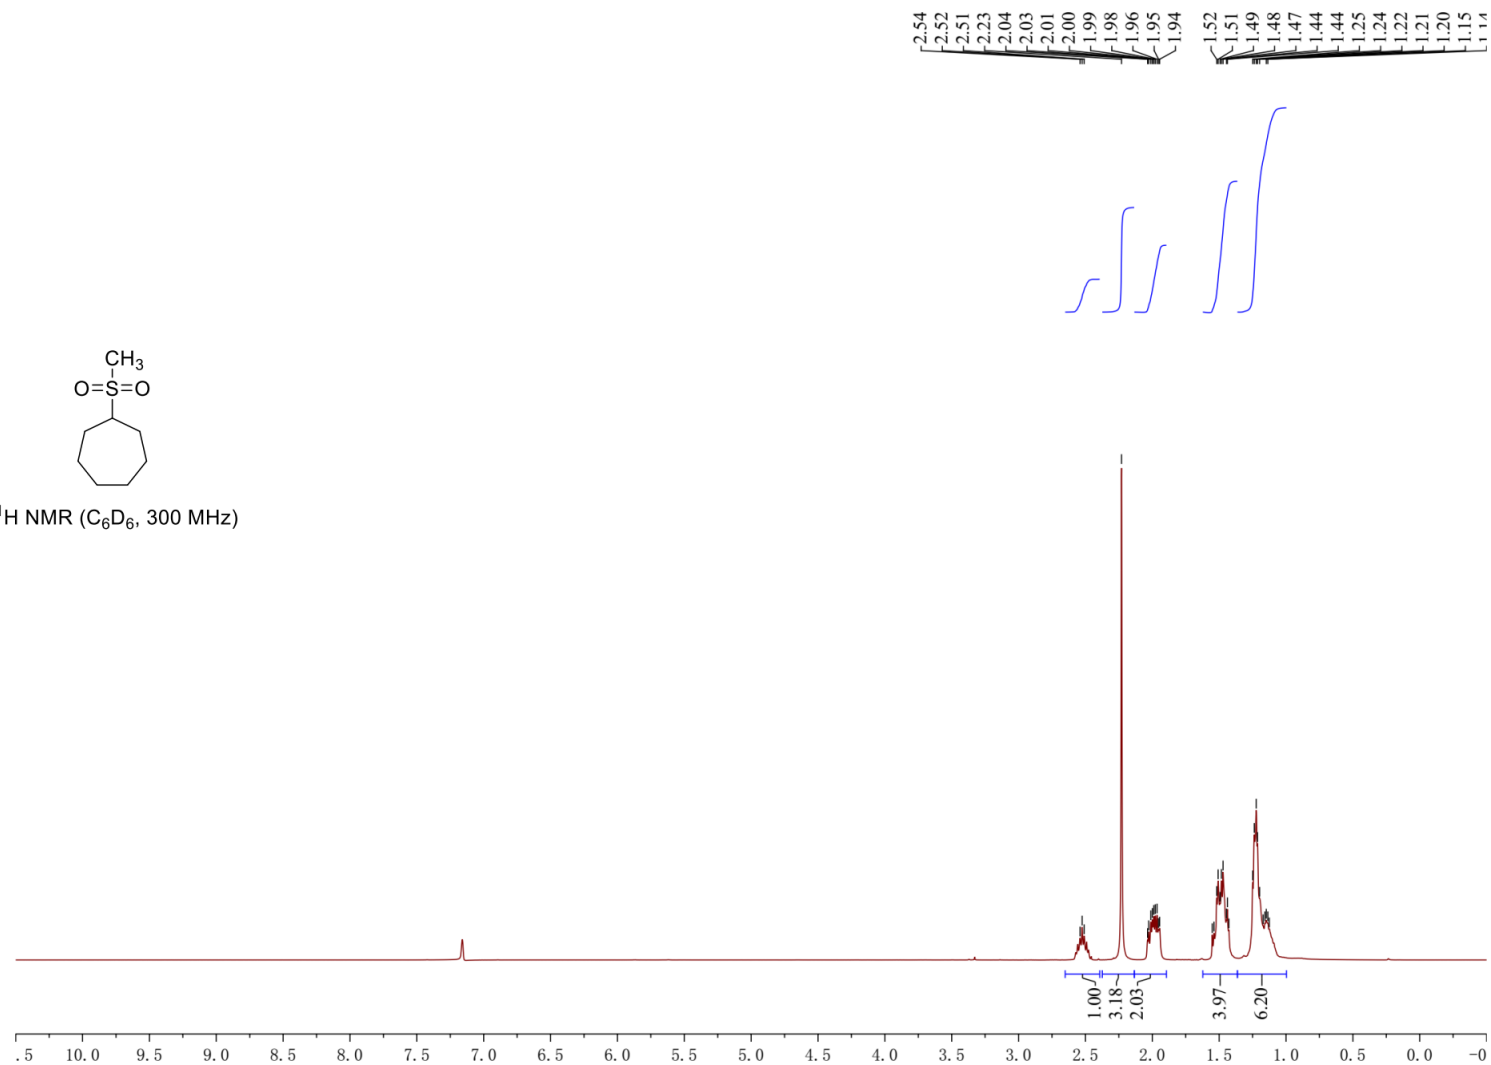

(Methylsulfonyl)cycloheptane (4)

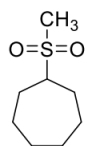

$^{13}\text{C}$  NMR ( $\text{C}_6\text{D}_6$ , 75 MHz)

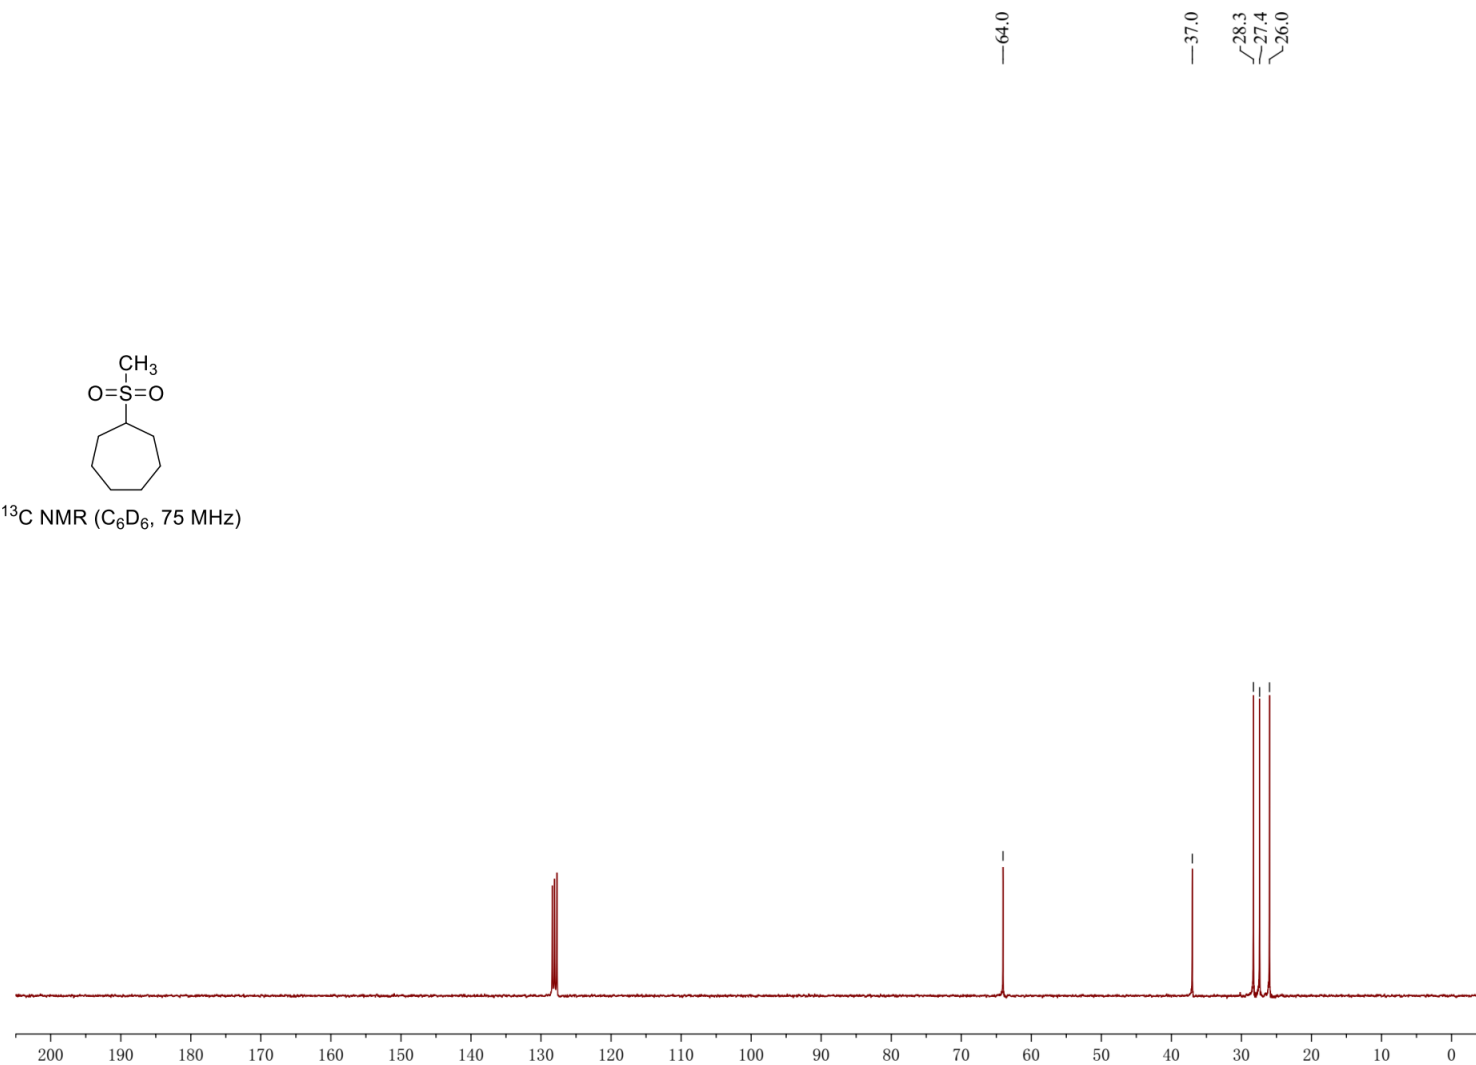

[Go back to table of contents](#)

### (Methylsulfonyl)cyclooctane (5)

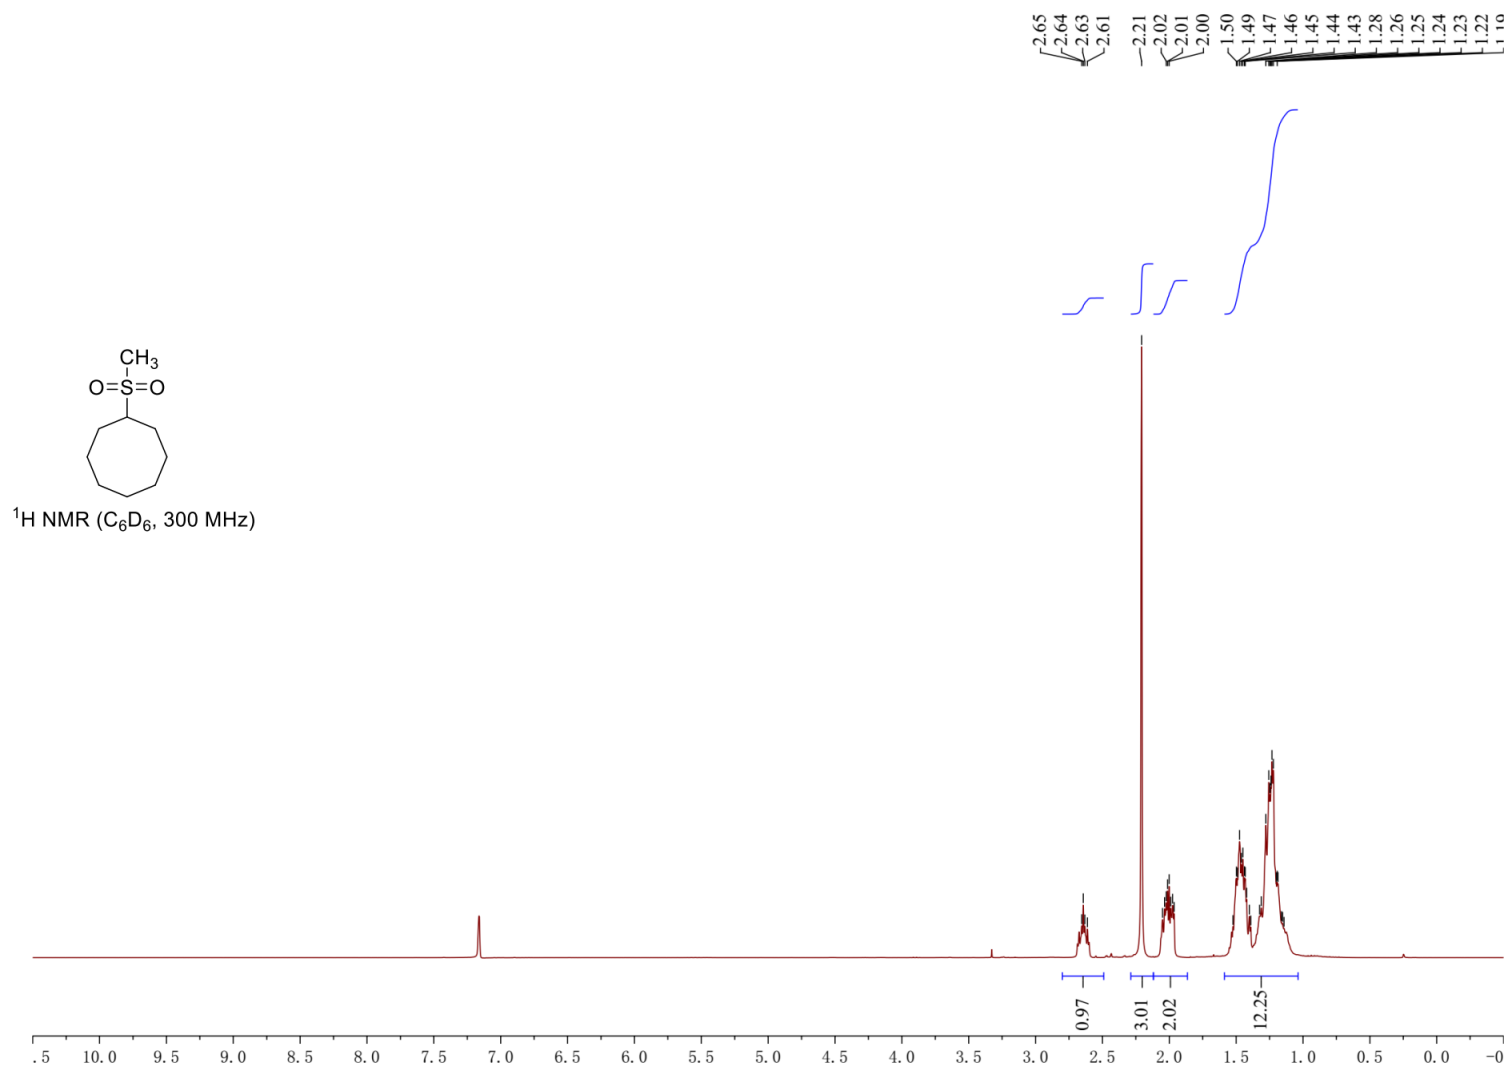

[Go back to table of contents](#)

# (Methylsulfonyl)cyclooctane (5)

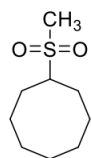

$^{13}\text{C}$  NMR ( $\text{C}_6\text{D}_6$ , 75 MHz)

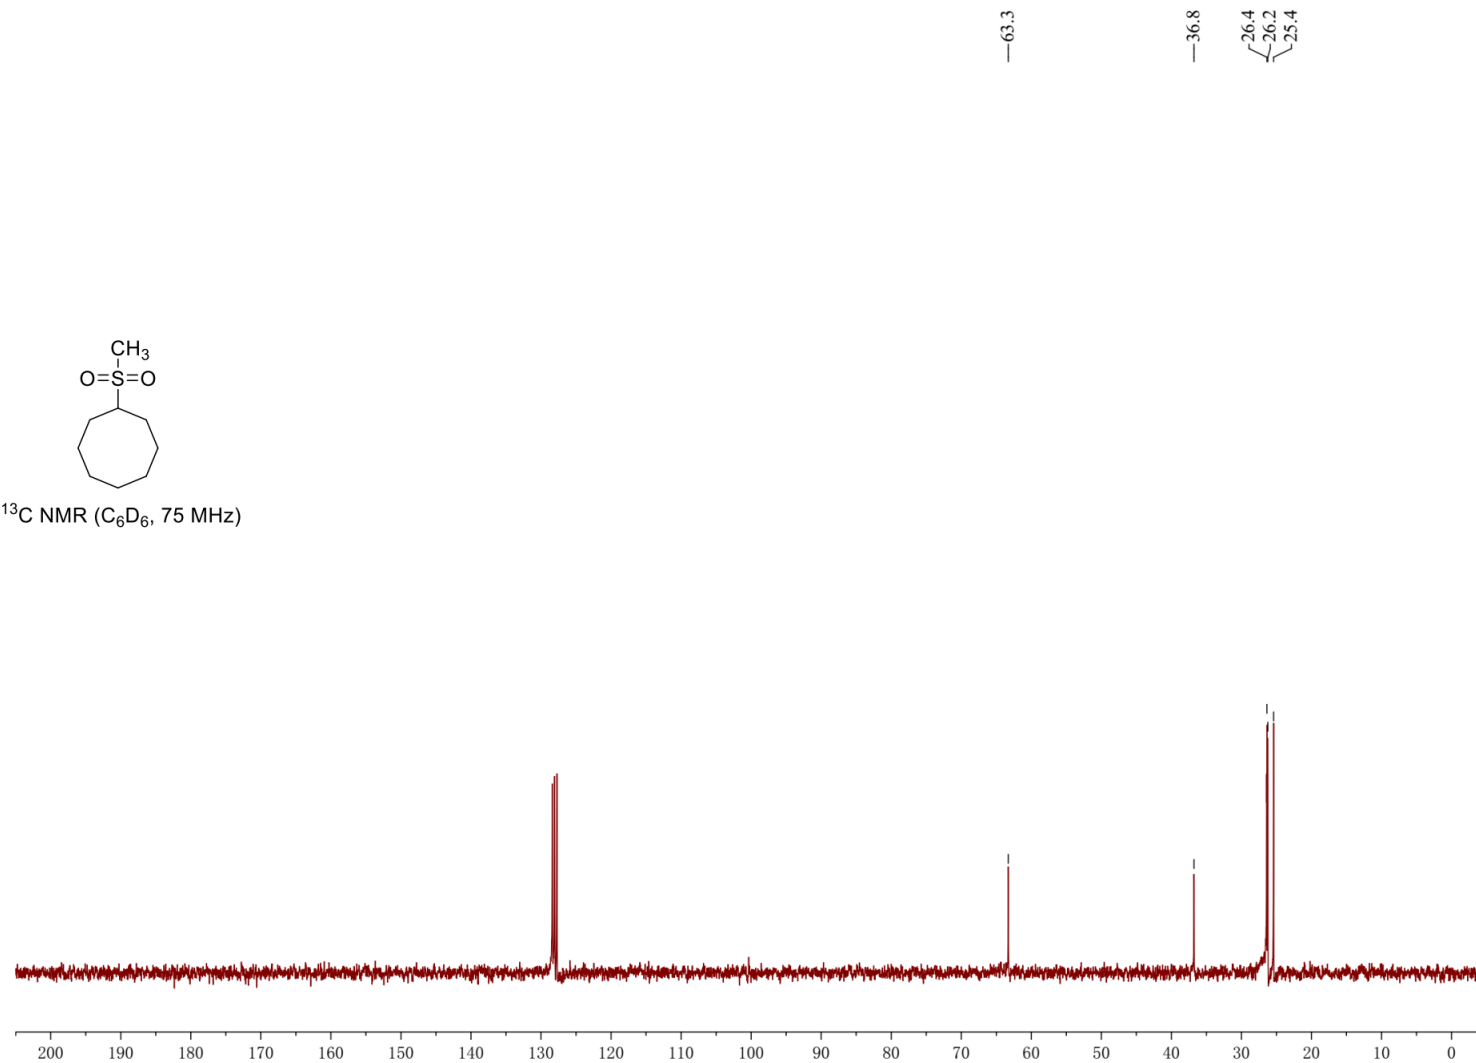

[Go back to table of contents](#)

### 1-(Methylsulfonyl)pentane (6a)

### 2-(Methylsulfonyl)pentane (6b)

### 3-(Methylsulfonyl)pentane (6c)

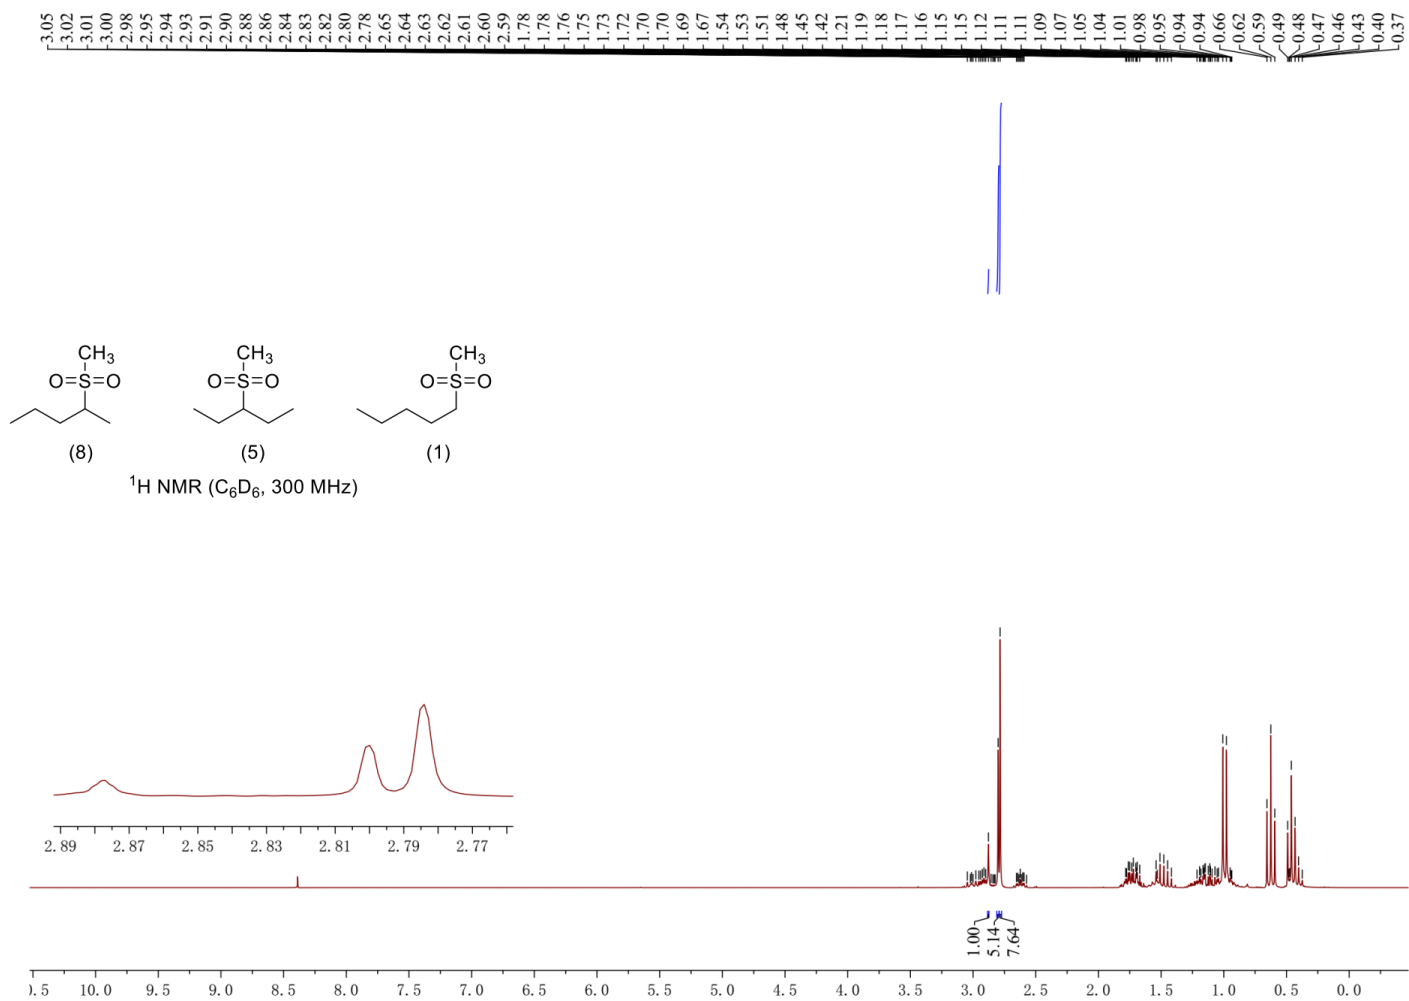

[Go back to table of contents](#)



1-(Methylsulfonyl)pentane (6a)

2-(Methylsulfonyl)pentane (6b)

3-(Methylsulfonyl)pentane (6c)

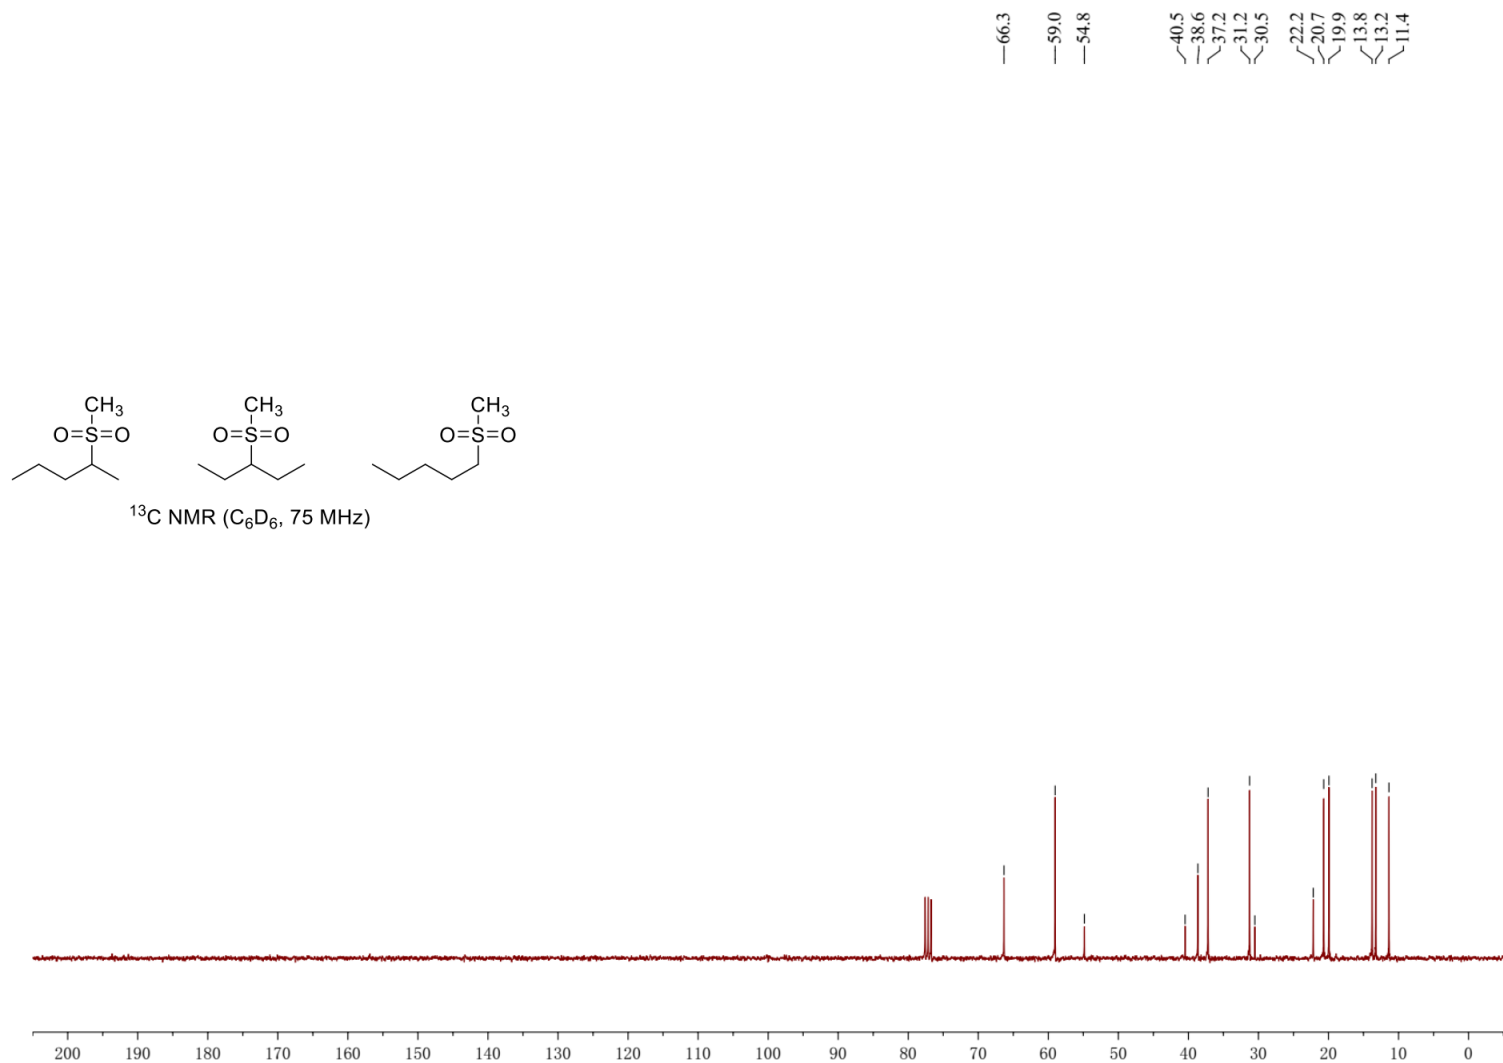

[Go back to table of contents](#)

[Go back to table of contents](#)

2,3-Dimethyl-1-(methylsulfonyl)butane (7a)

2,3-Dimethyl-2-(methylsulfonyl)butane (7b)

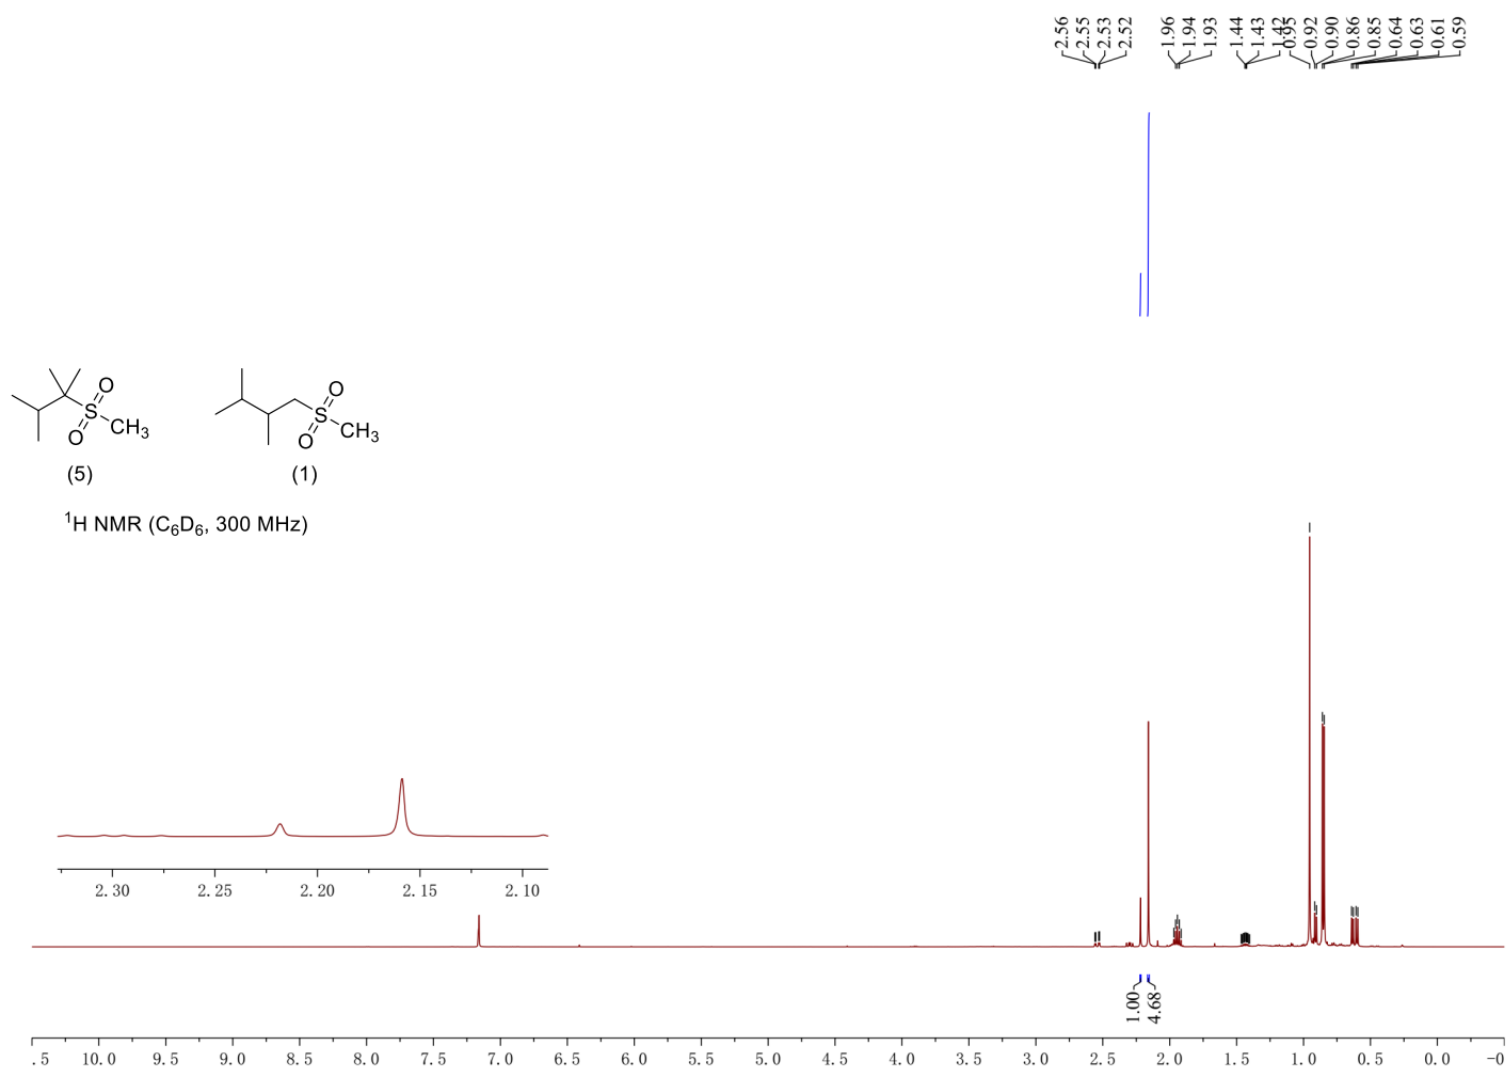

[Go back to table of contents](#)

2,3-Dimethyl-1-(methylsulfonyl)butane (7a)

2,3-Dimethyl-2-(methylsulfonyl)butane (7b)

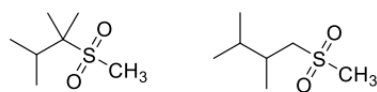

$^{13}\text{C}$  NMR ( $\text{C}_6\text{D}_6$ , 75 MHz)

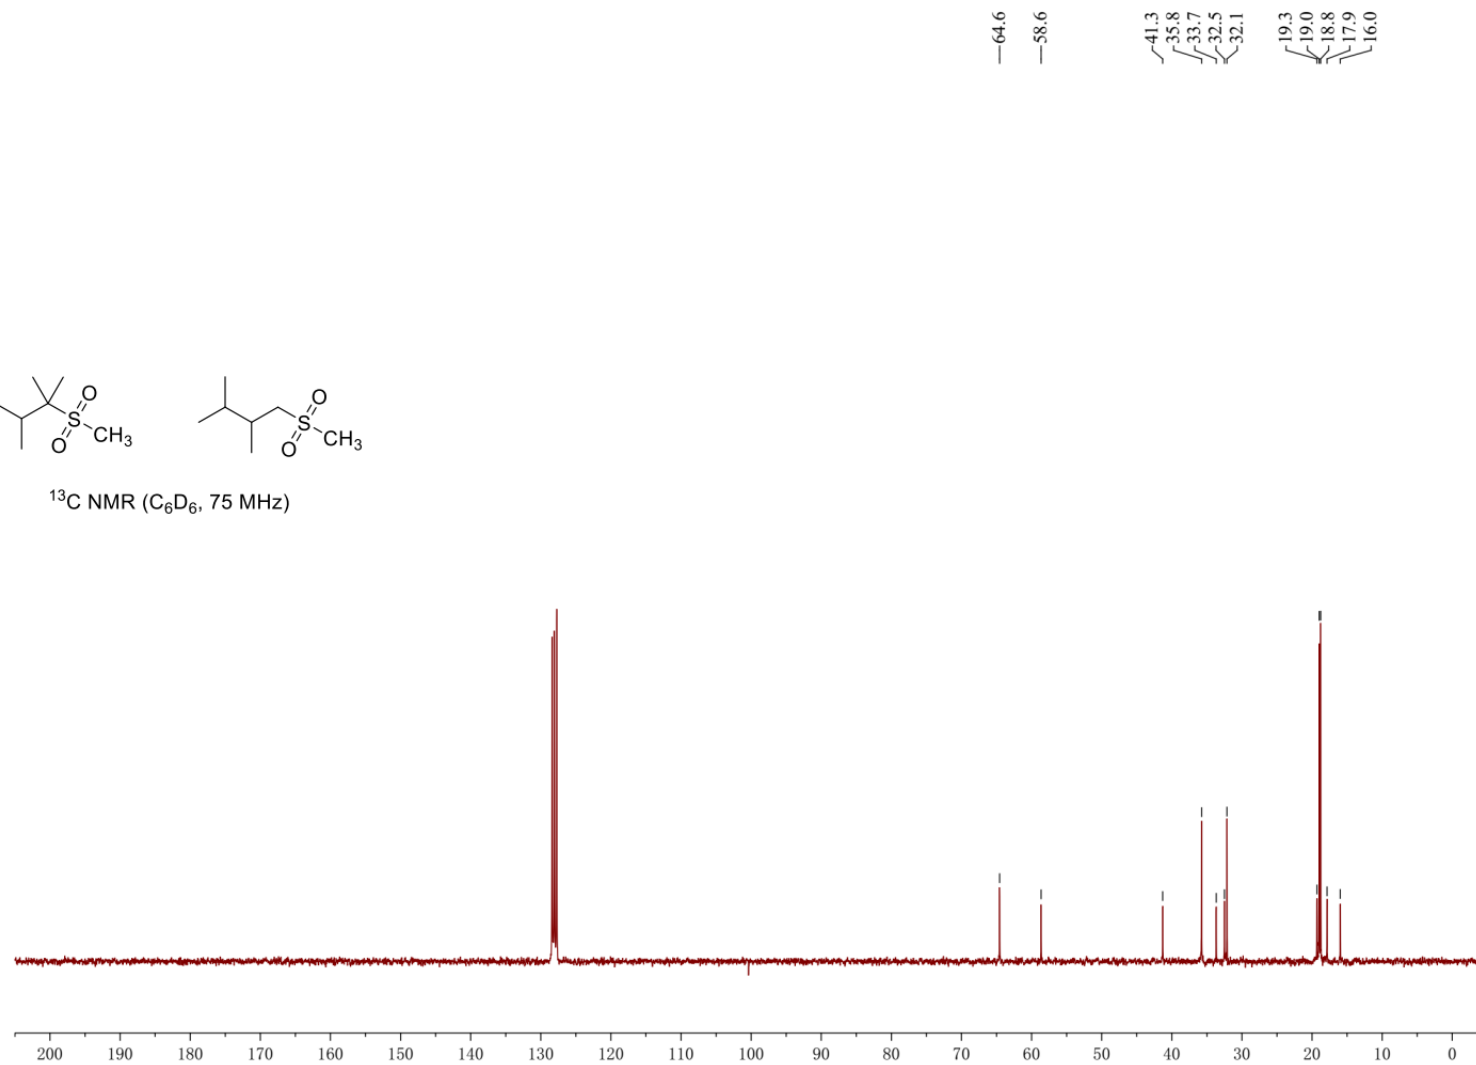

[Go back to table of contents](#)

### 3,3-Dimethyl-4-(methylsulfonyl)butan-2-one (8)

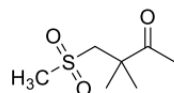

$^1\text{H NMR}$  ( $\text{CDCl}_3$ , 300 MHz)

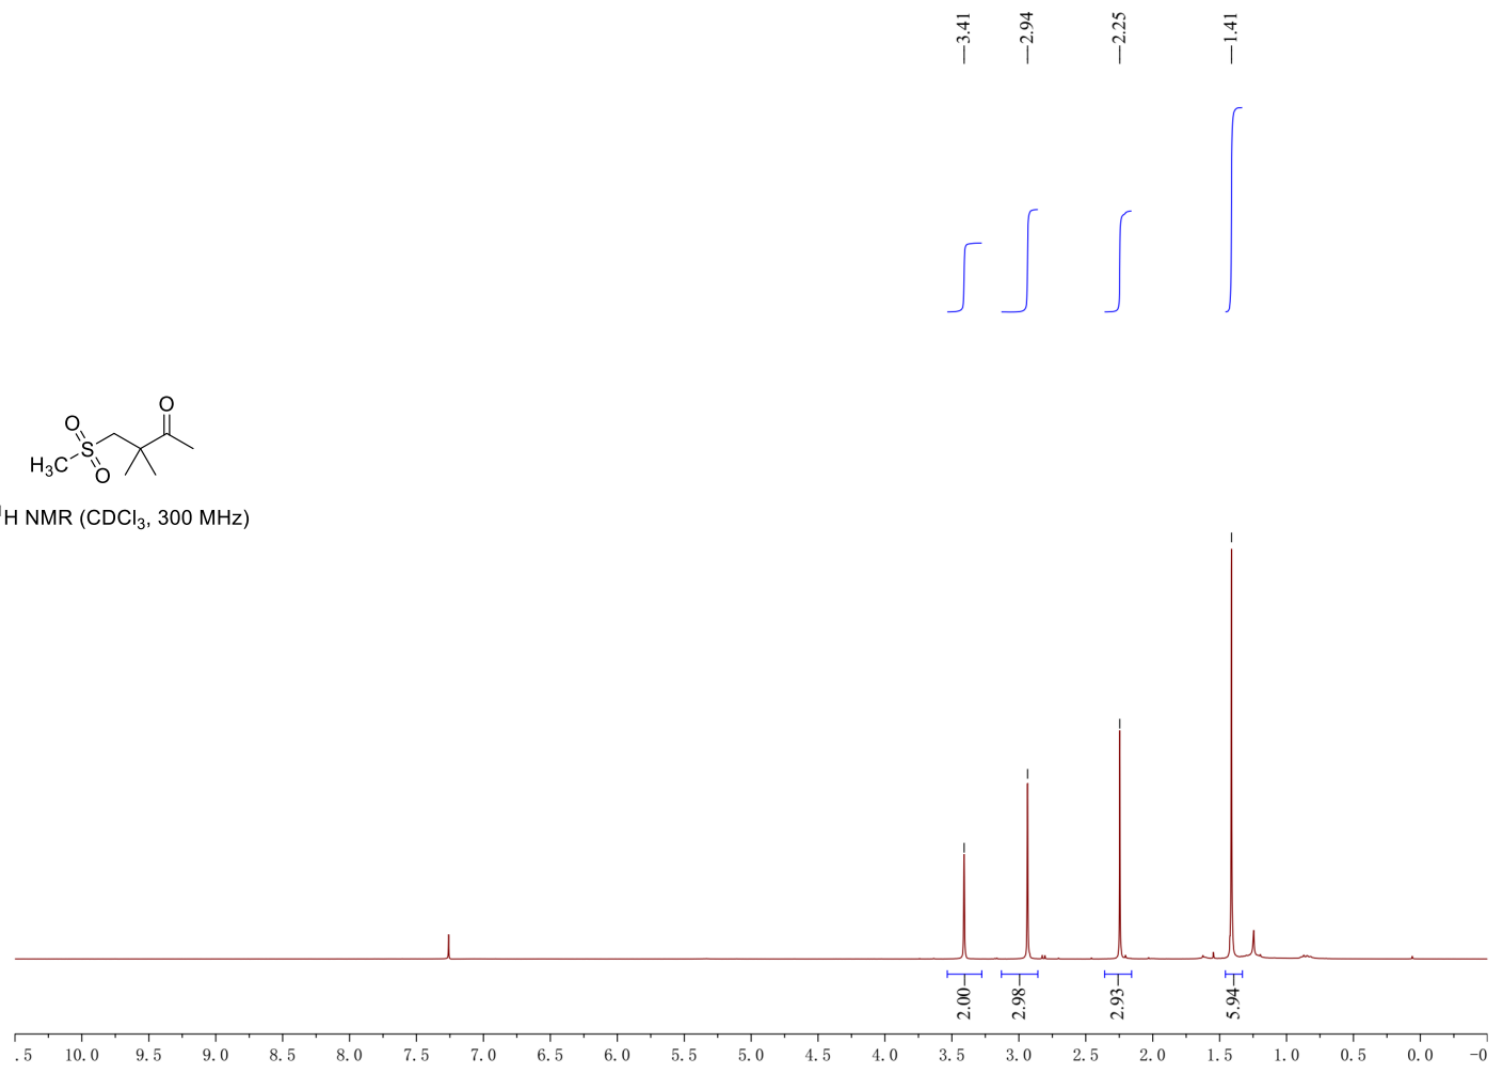

[Go back to table of contents](#)

### 3,3-Dimethyl-4-(methylsulfonyl)butan-2-one (8)

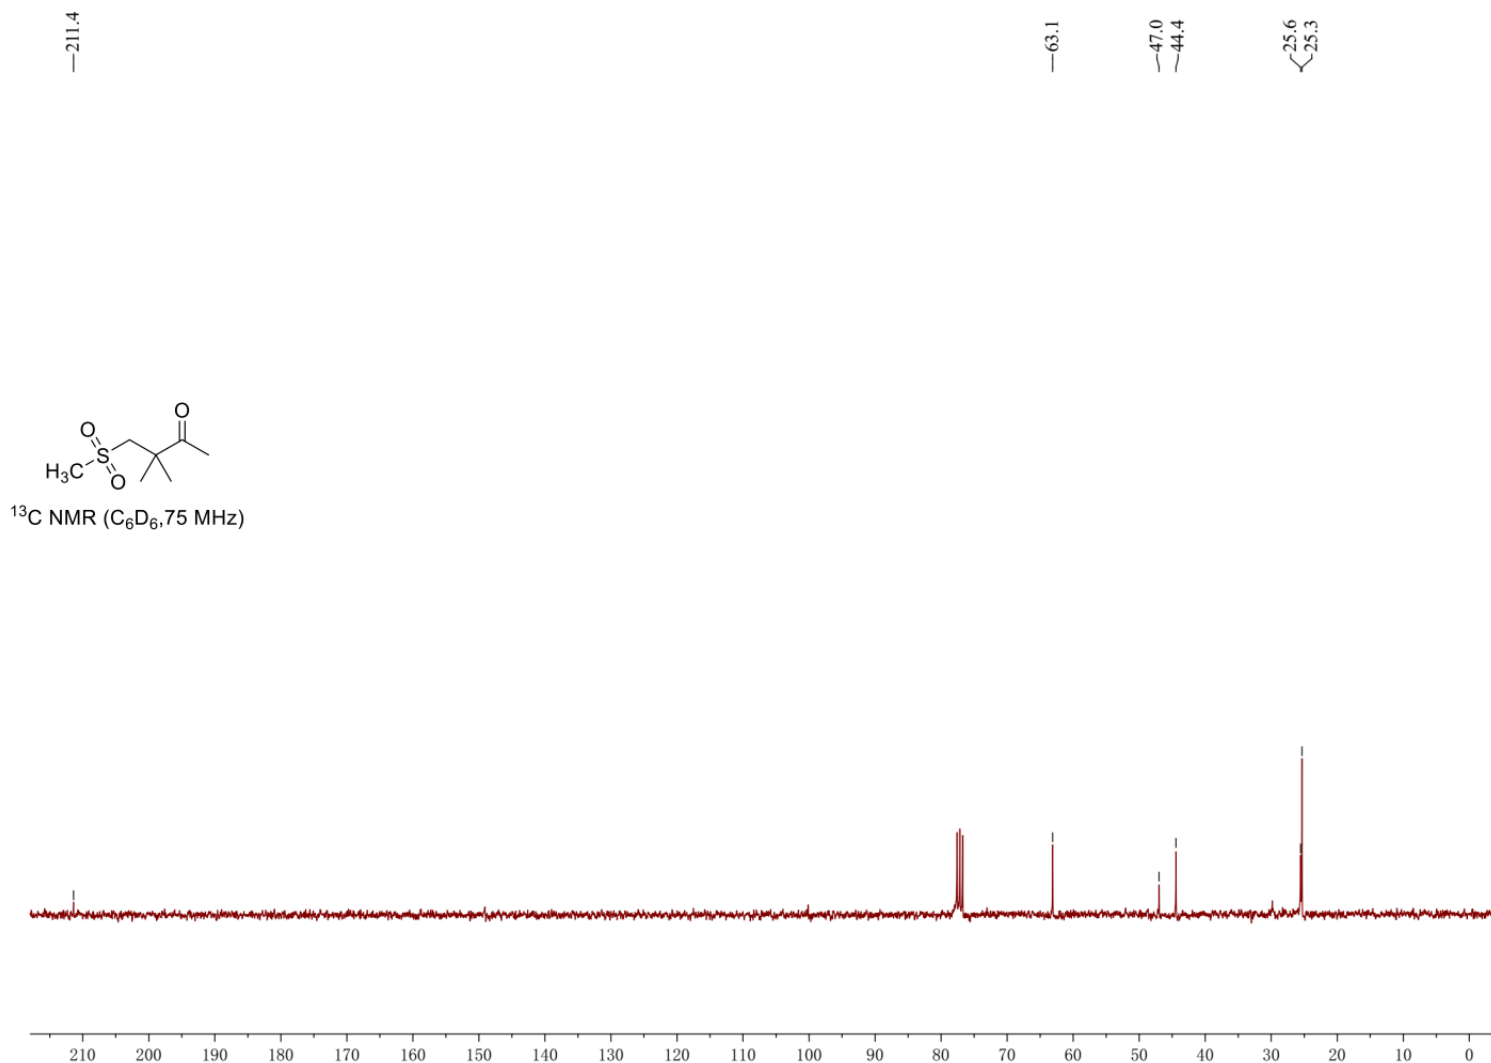

[Go back to table of contents](#)

### 1-(Allylsulfonyl)pentan-3-one (9)

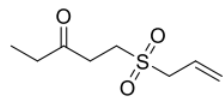

$^1\text{H NMR}$  ( $\text{CDCl}_3$ , 500 MHz)

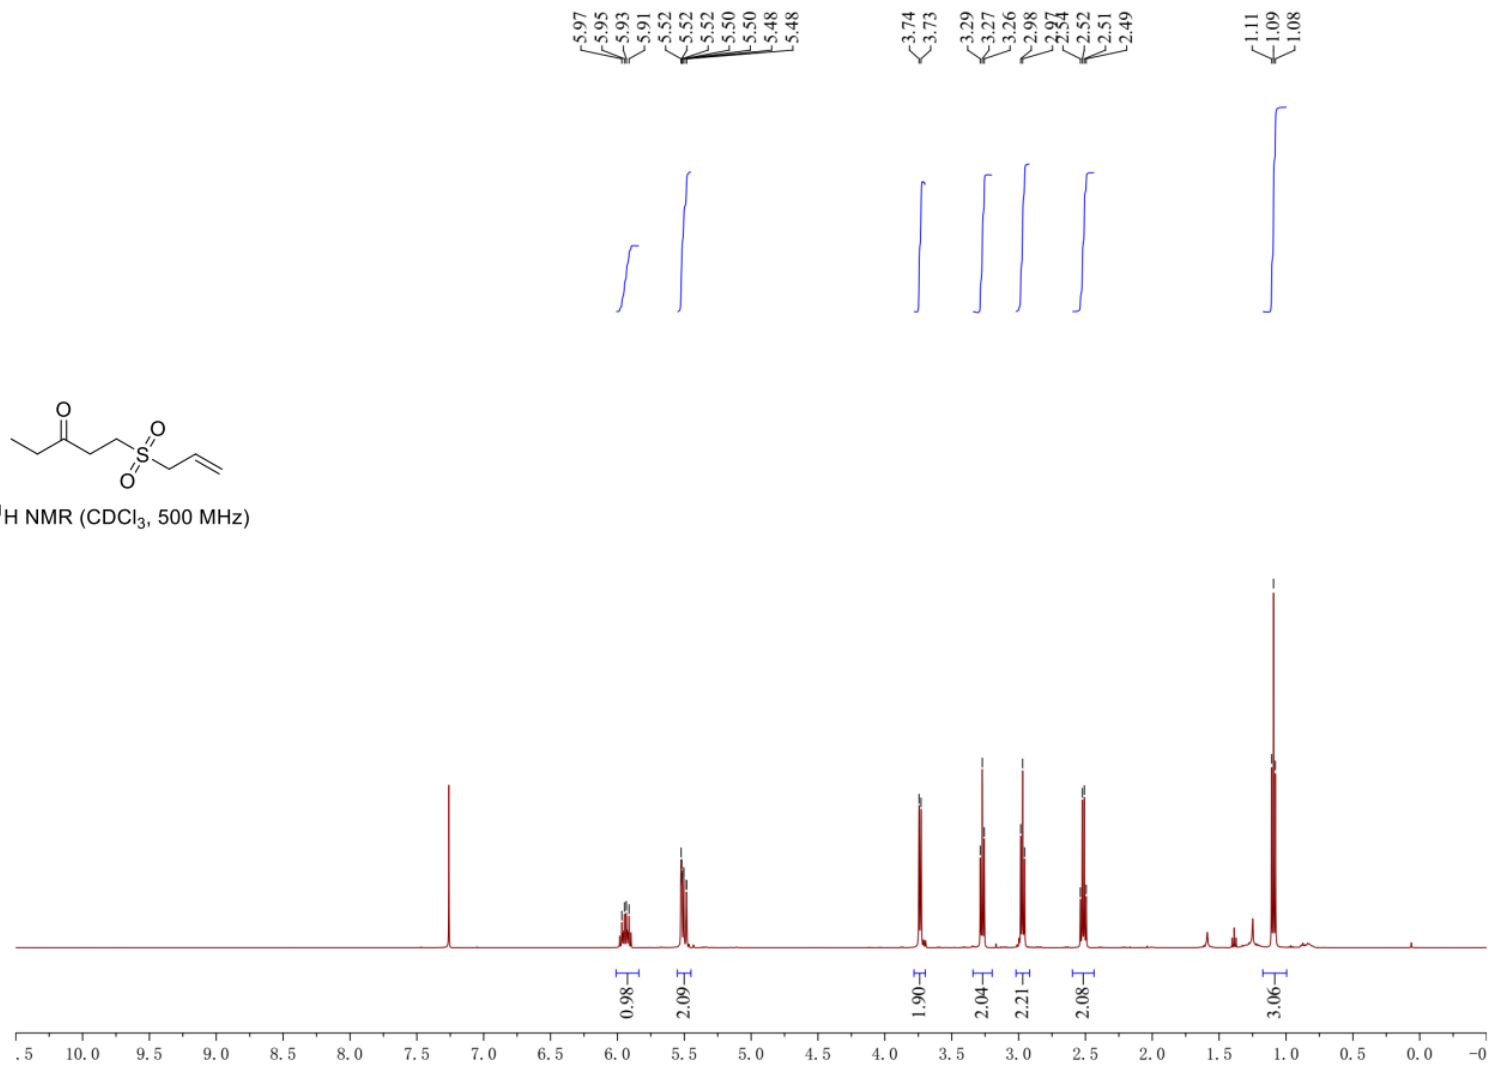

[Go back to table of contents](#)

### 1-(Allylsulfonyl)pentan-3-one (9)

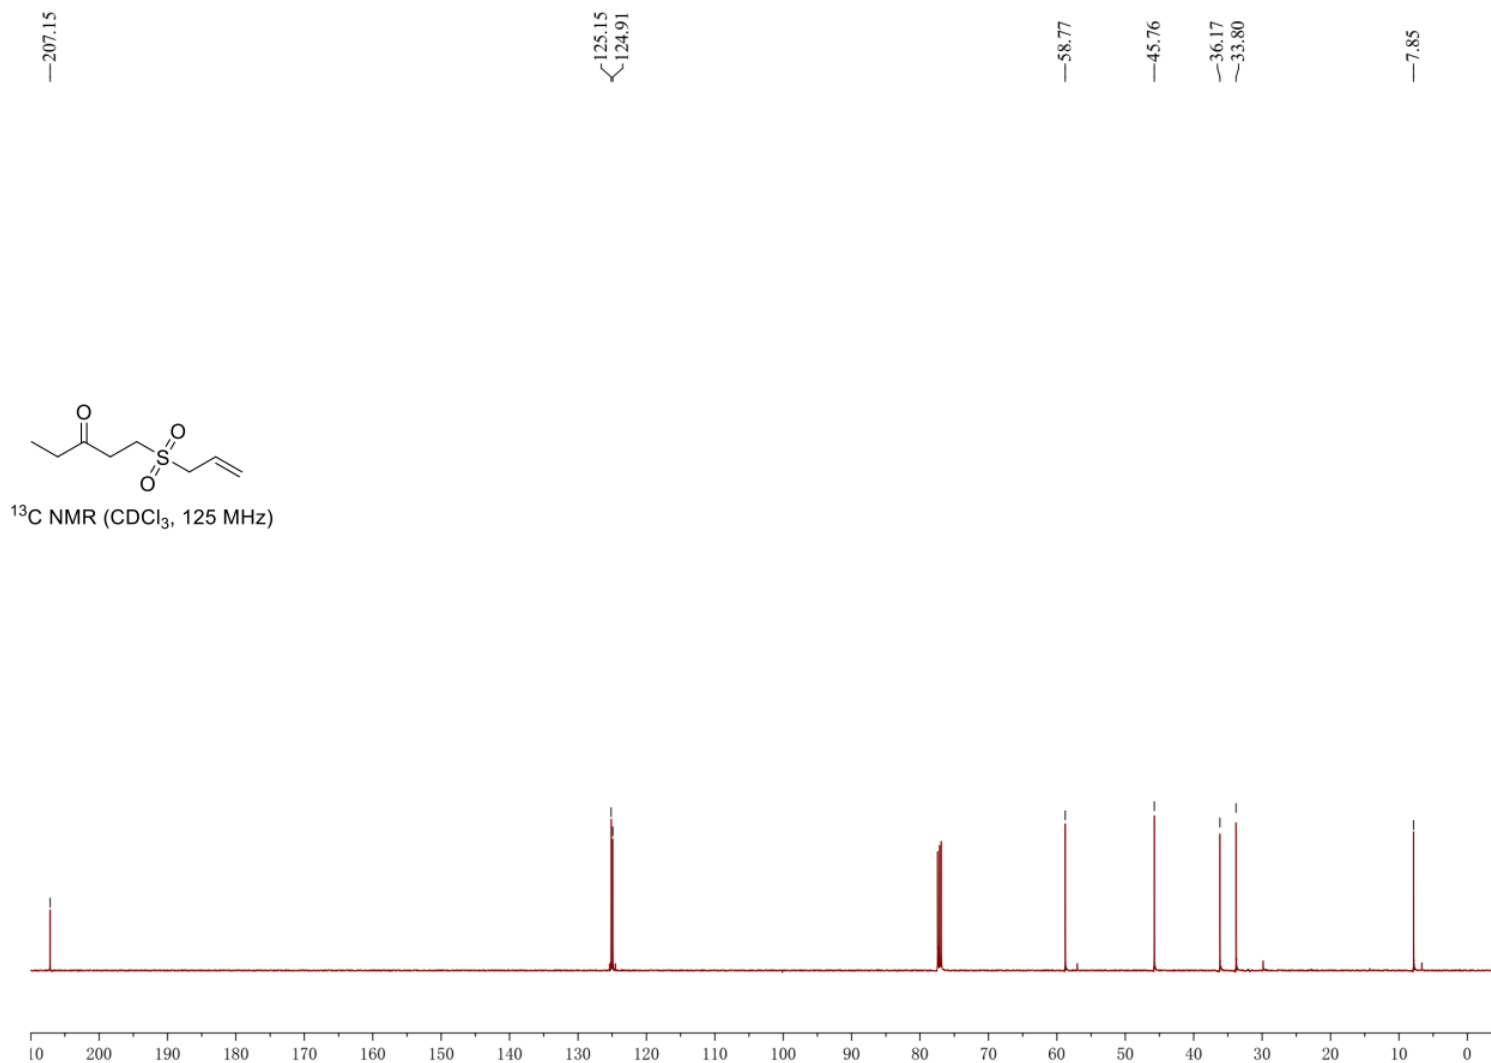

[Go back to table of contents](#)



### 5-(Allylsulfonyl)pentan-2-one (10a)

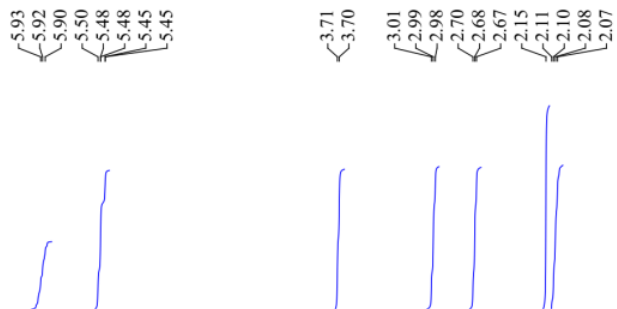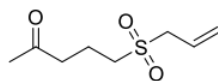

<sup>1</sup>H NMR (CDCl<sub>3</sub>, 500 MHz)

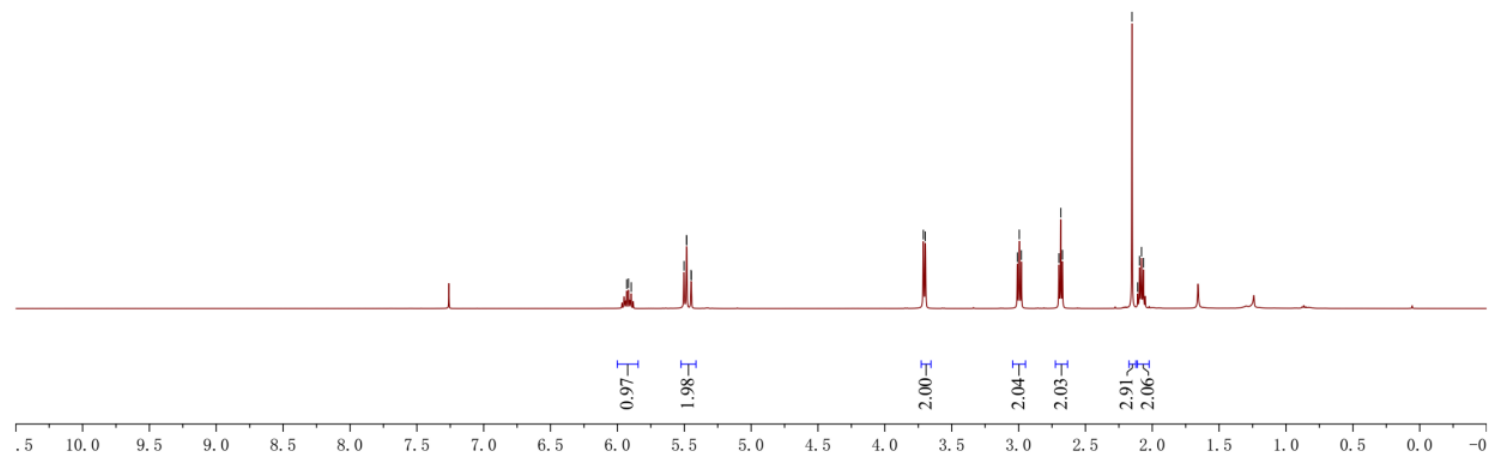

[Go back to table of contents](#)

### 5-(Allylsulfonyl)pentan-2-one (10a)

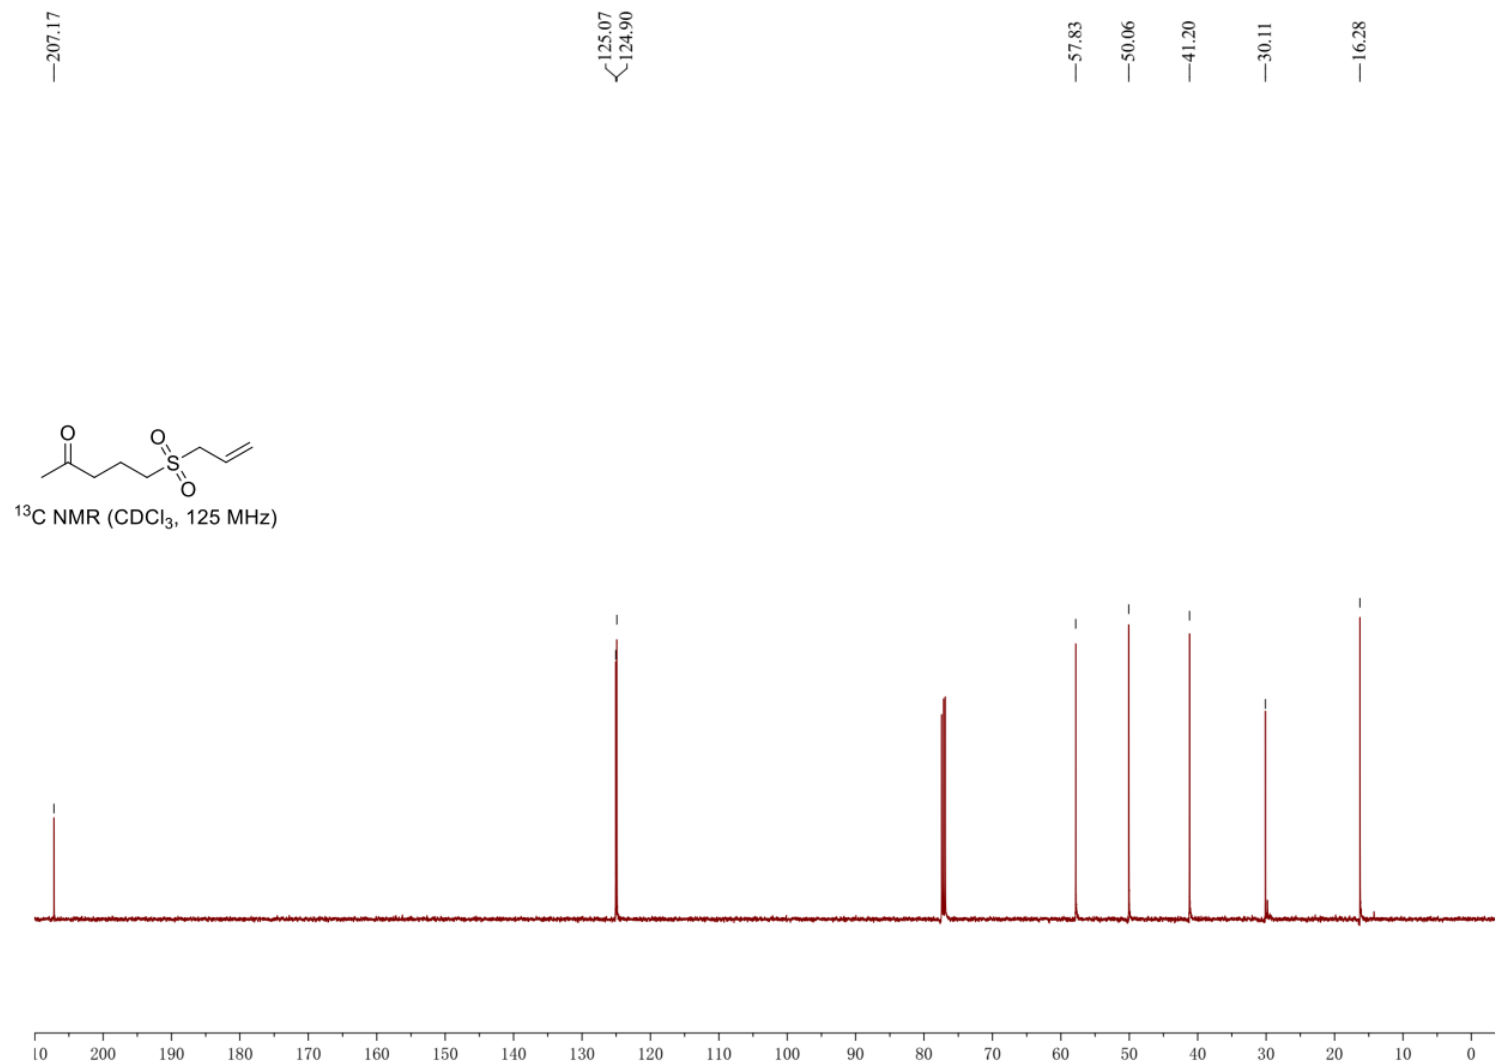

[Go back to table of contents](#)

### 4-(Allylsulfonyl)pentan-2-one (10b)

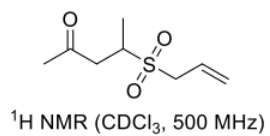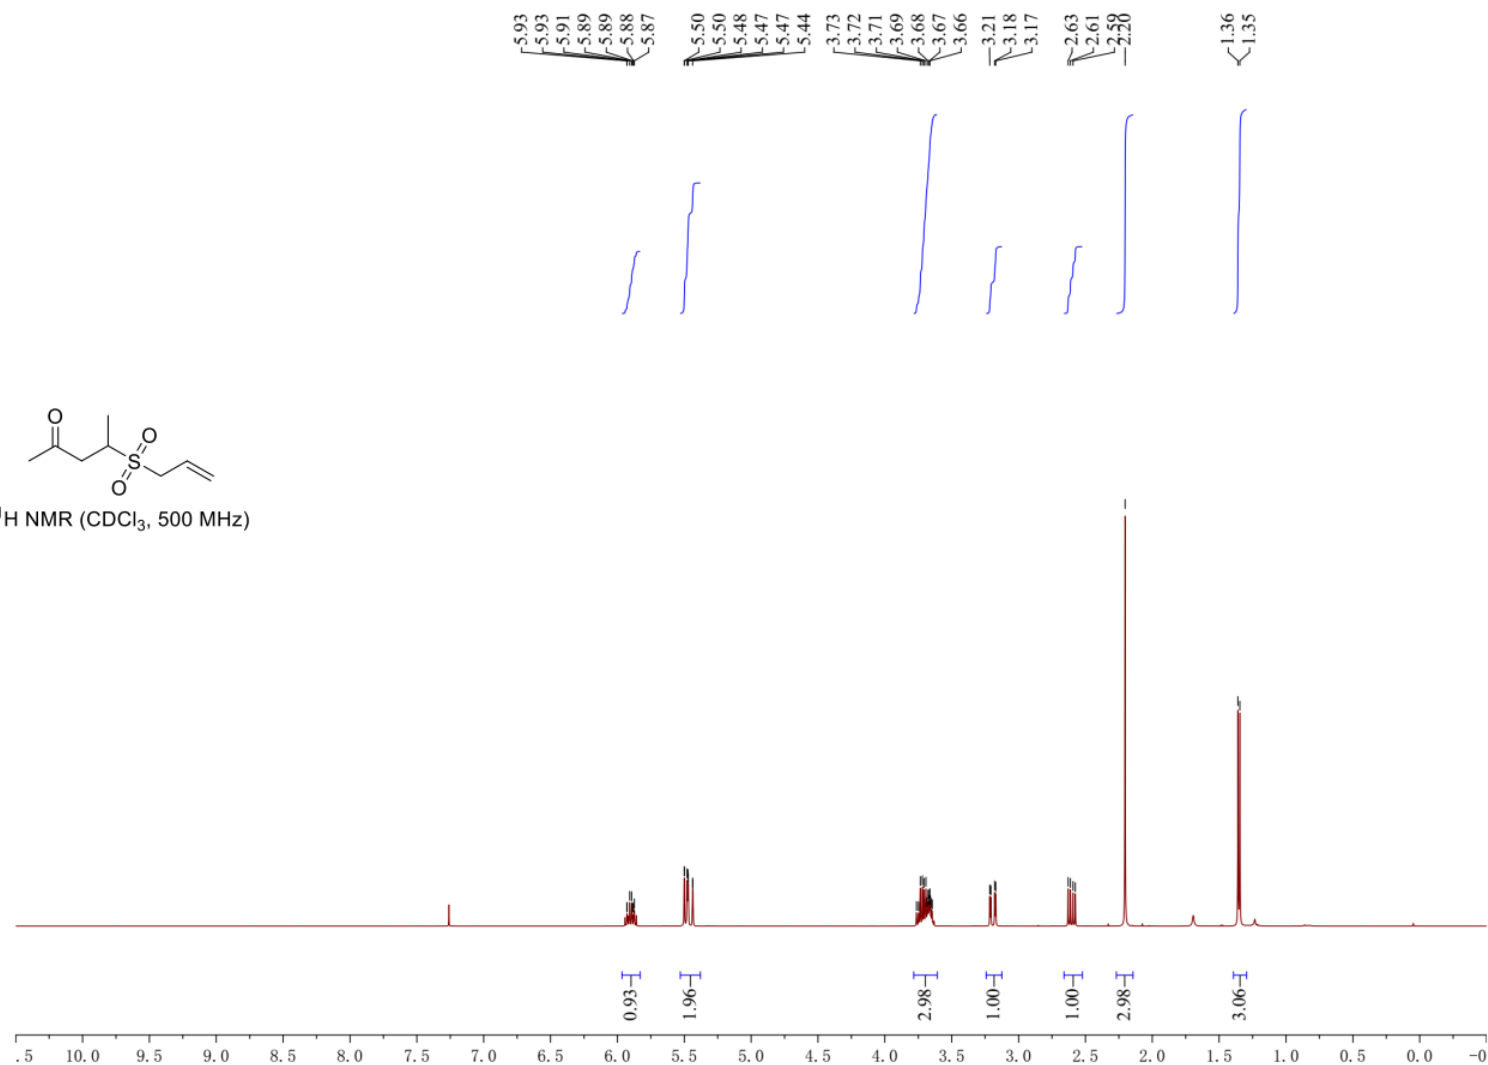

[Go back to table of contents](#)

### 4-(Allylsulfonyl)pentan-2-one (10b)

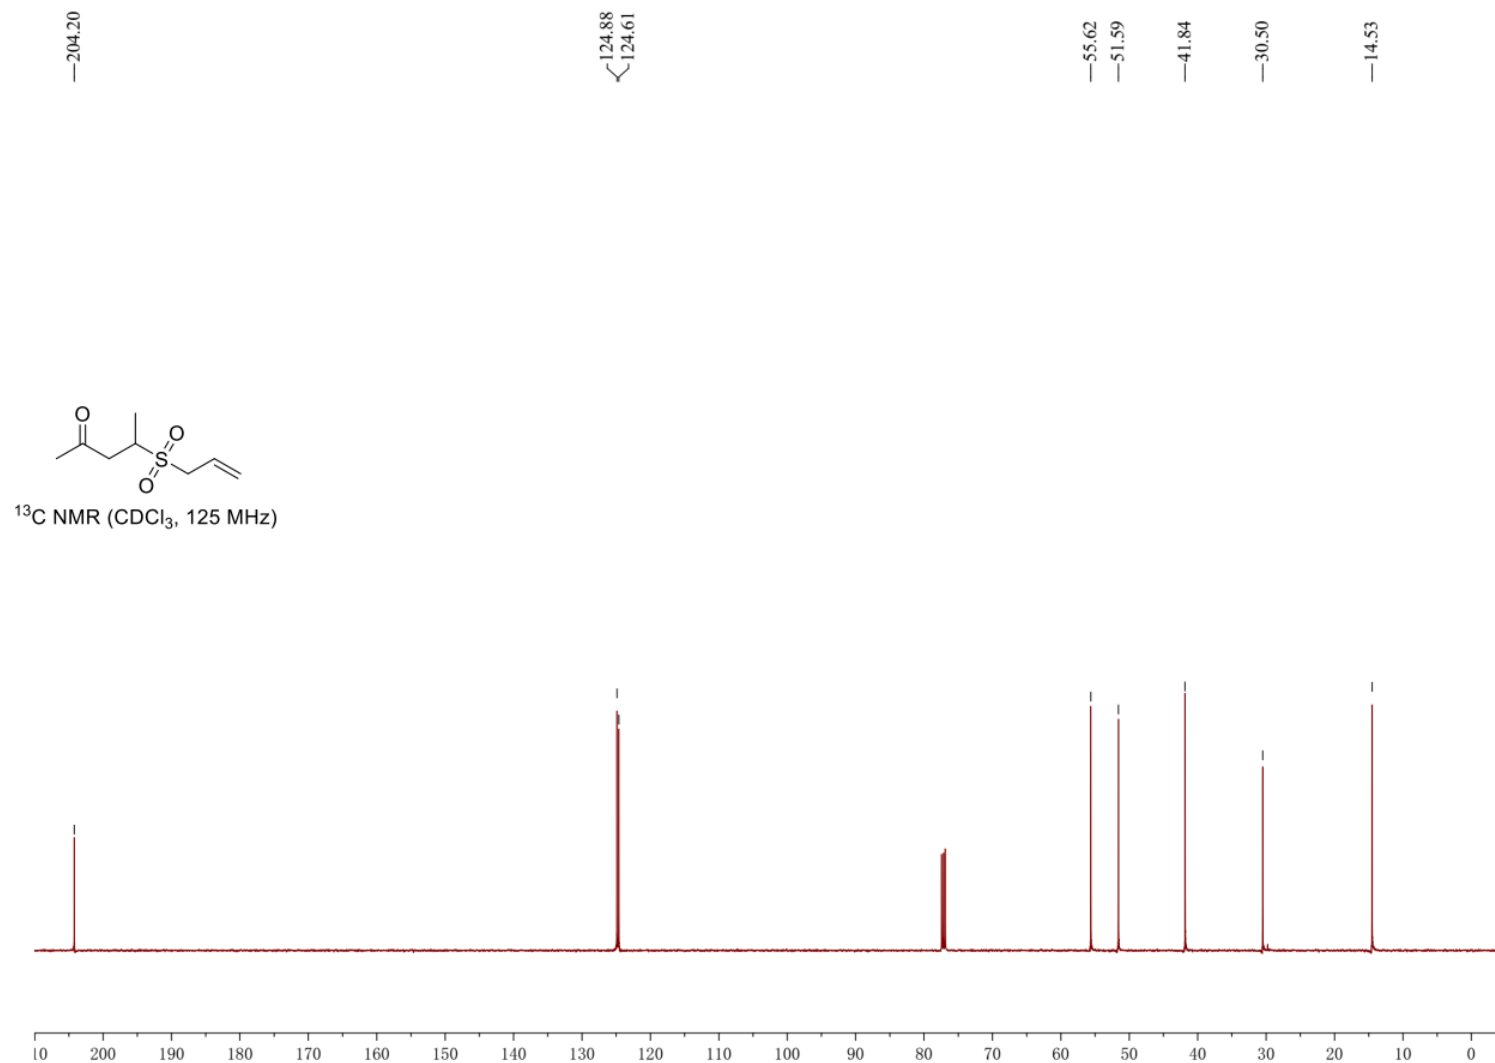

[Go back to table of contents](#)

### 6-(Allylsulfonyl)hexan-2-one (11a)

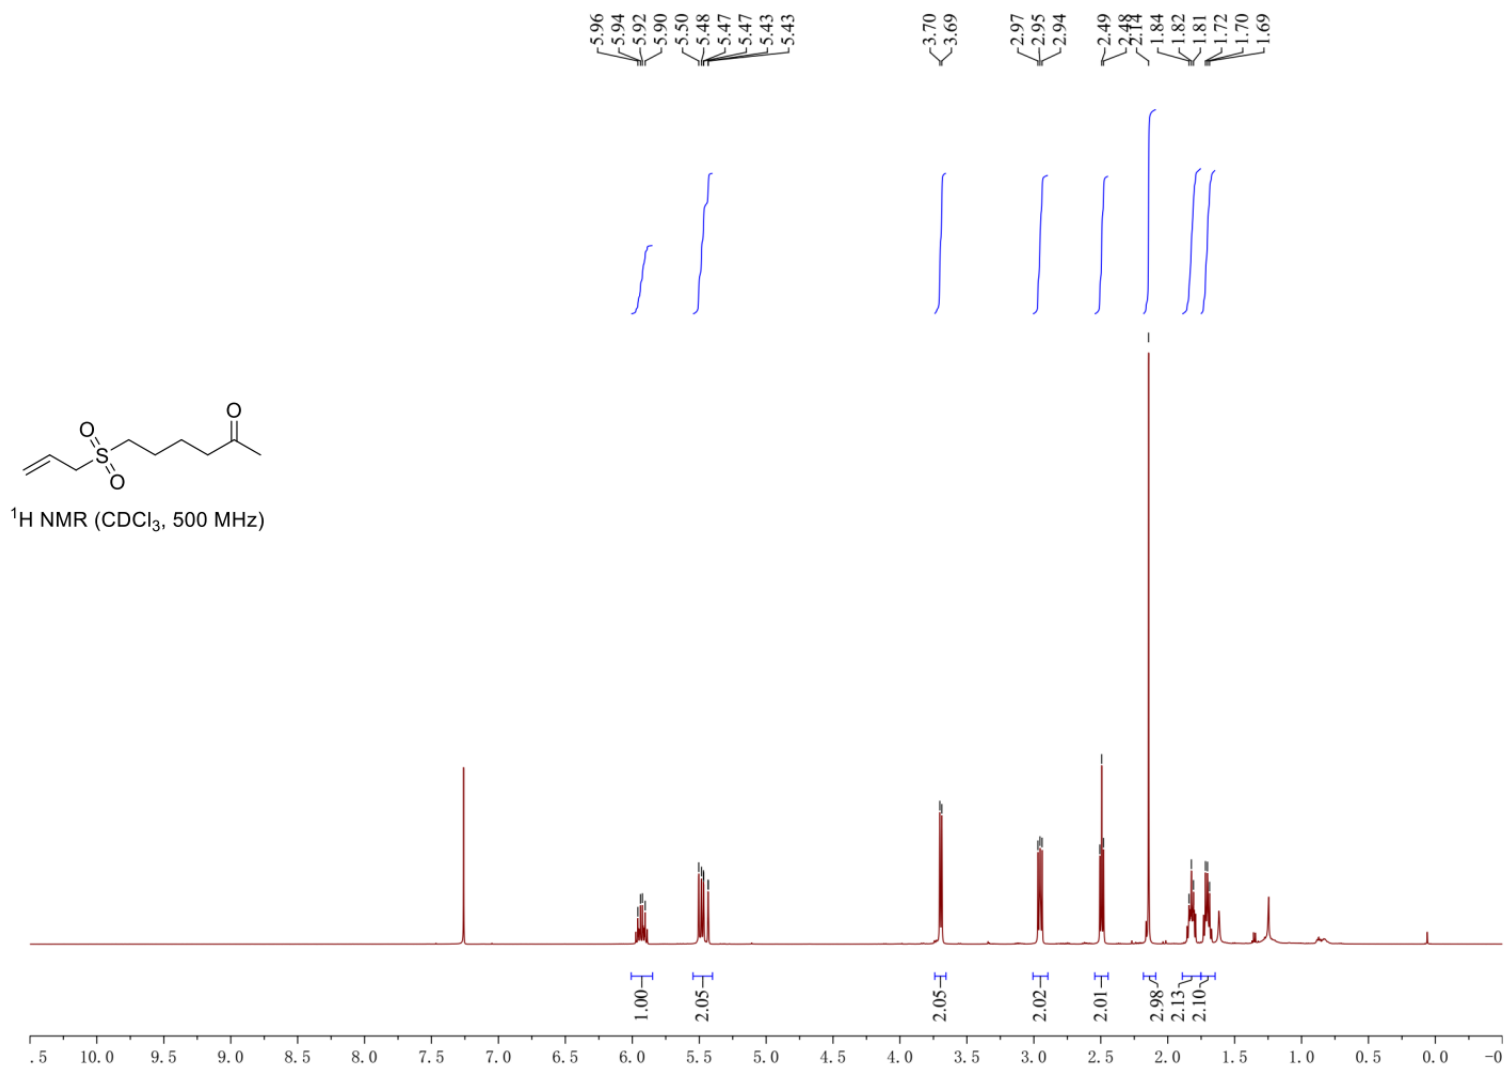

[Go back to table of contents](#)

### 6-(Allylsulfonyl)hexan-2-one (11a)

—207.8

77.4  
77.2  
76.9

—57.9

—51.1

—42.8

—30.1

22.5  
21.4

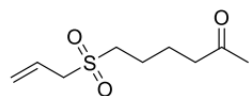

<sup>13</sup>C NMR (CDCl<sub>3</sub>, 125 MHz)

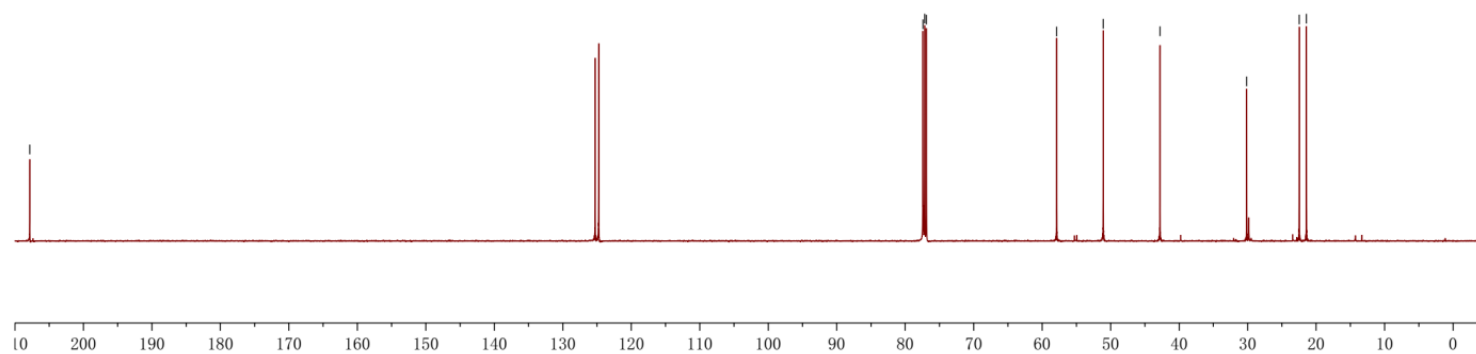

[Go back to table of contents](#)

### 5-(Allylsulfonyl)hexan-2-one (11b)

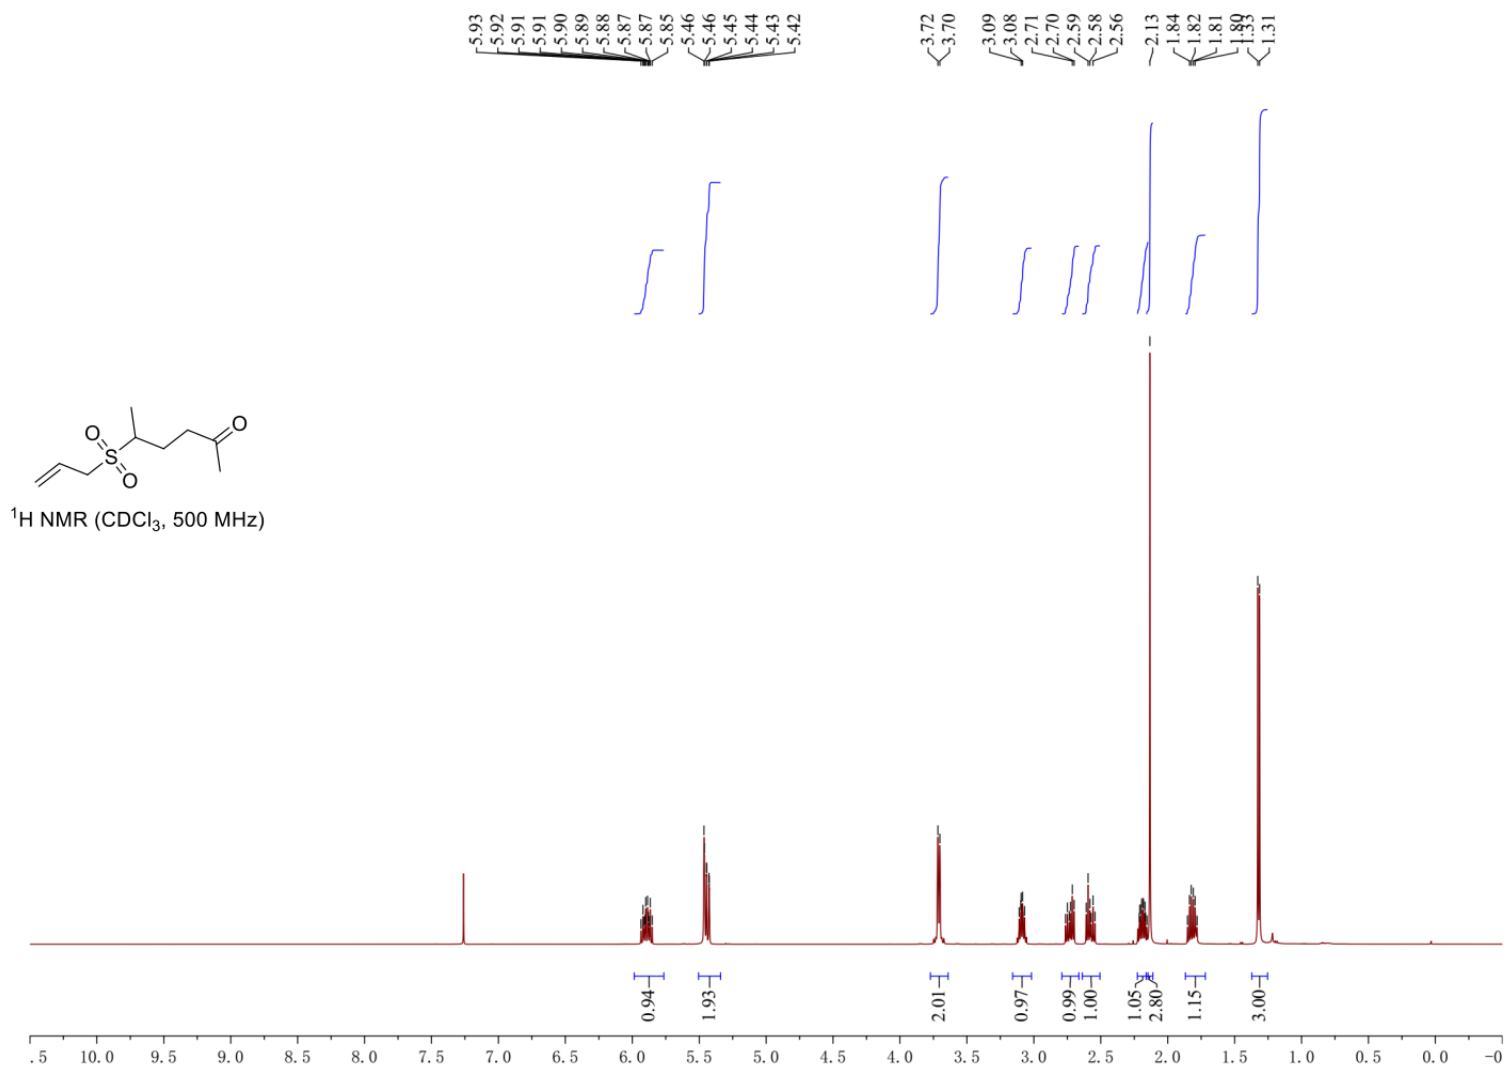

[Go back to table of contents](#)

### 5-(Allylsulfonyl)hexan-2-one (11b)

—207.3

124.7  
124.6

55.2  
54.9

—39.7

—30.1

—23.3

—13.2

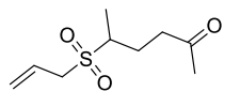

<sup>13</sup>C NMR (CDCl<sub>3</sub>, 125 MHz)

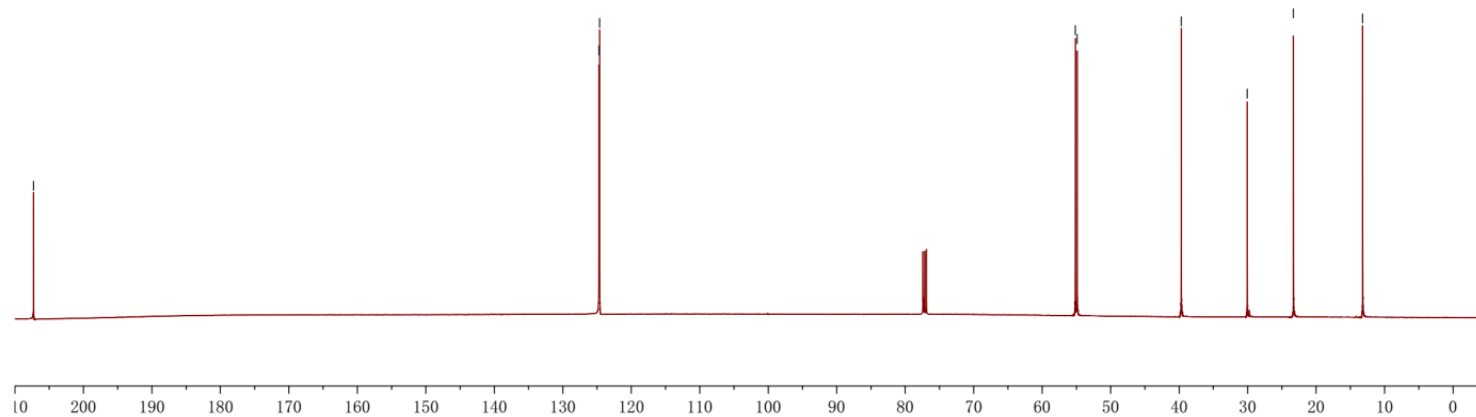

[Go back to table of contents](#)



### 4-(Allylsulfonyl)hexan-2-one (11c)

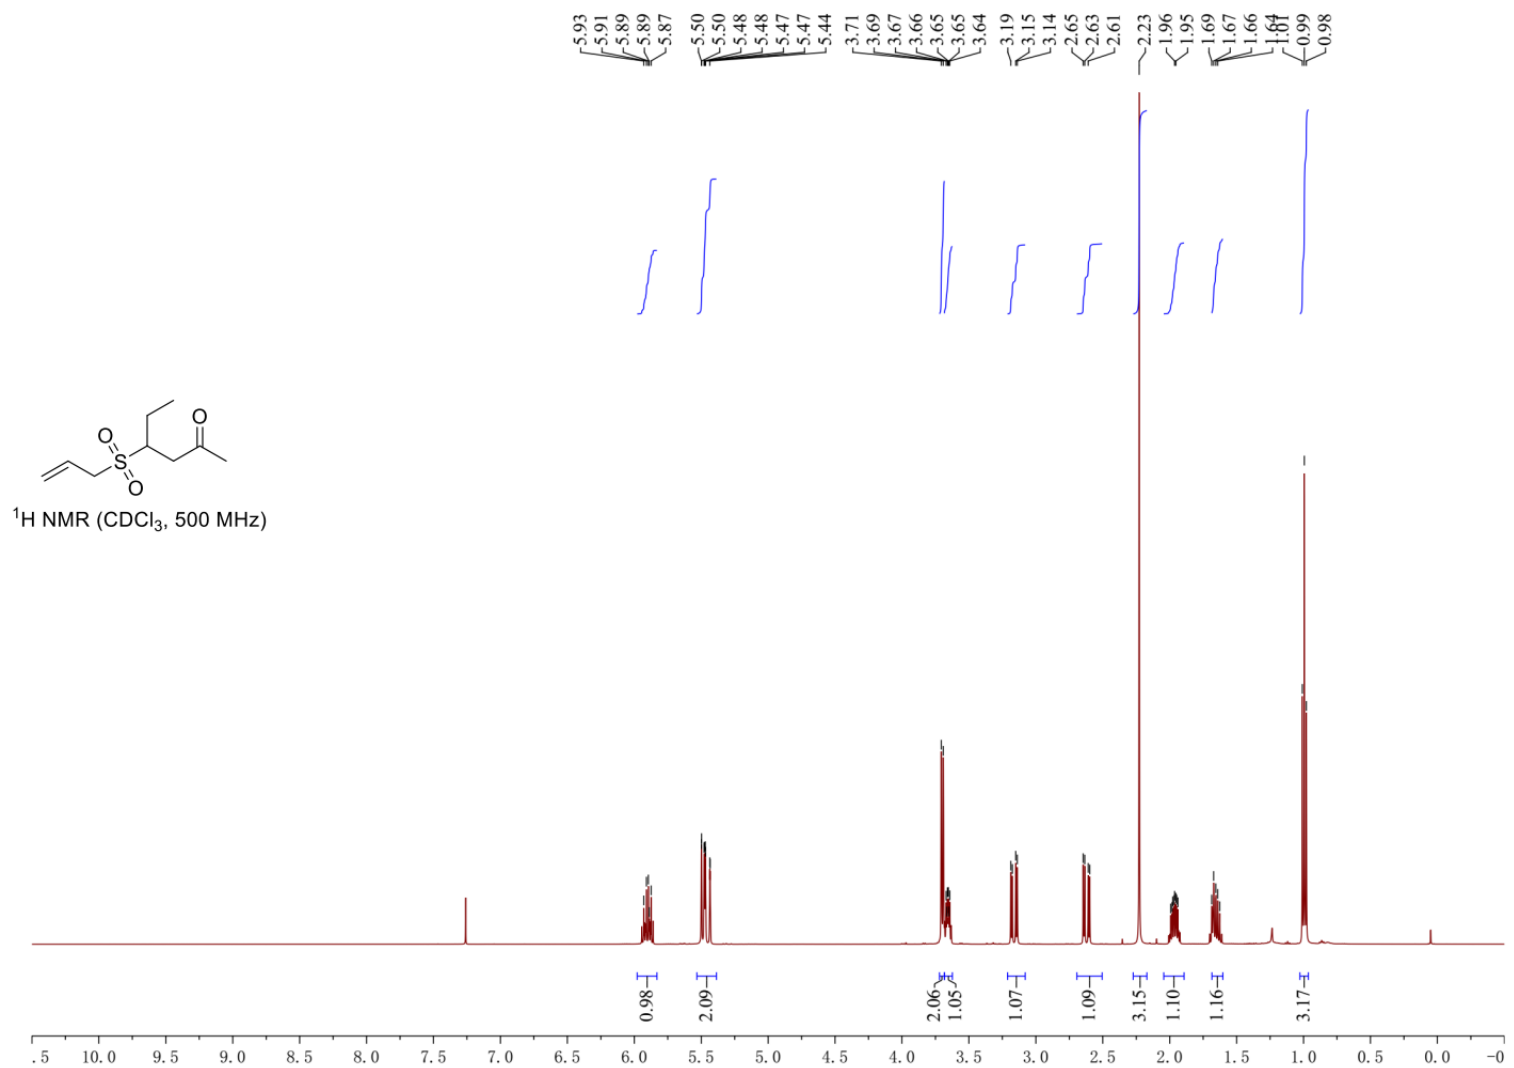

[Go back to table of contents](#)

### 4-(Allylsulfonyl)hexan-2-one (11c)

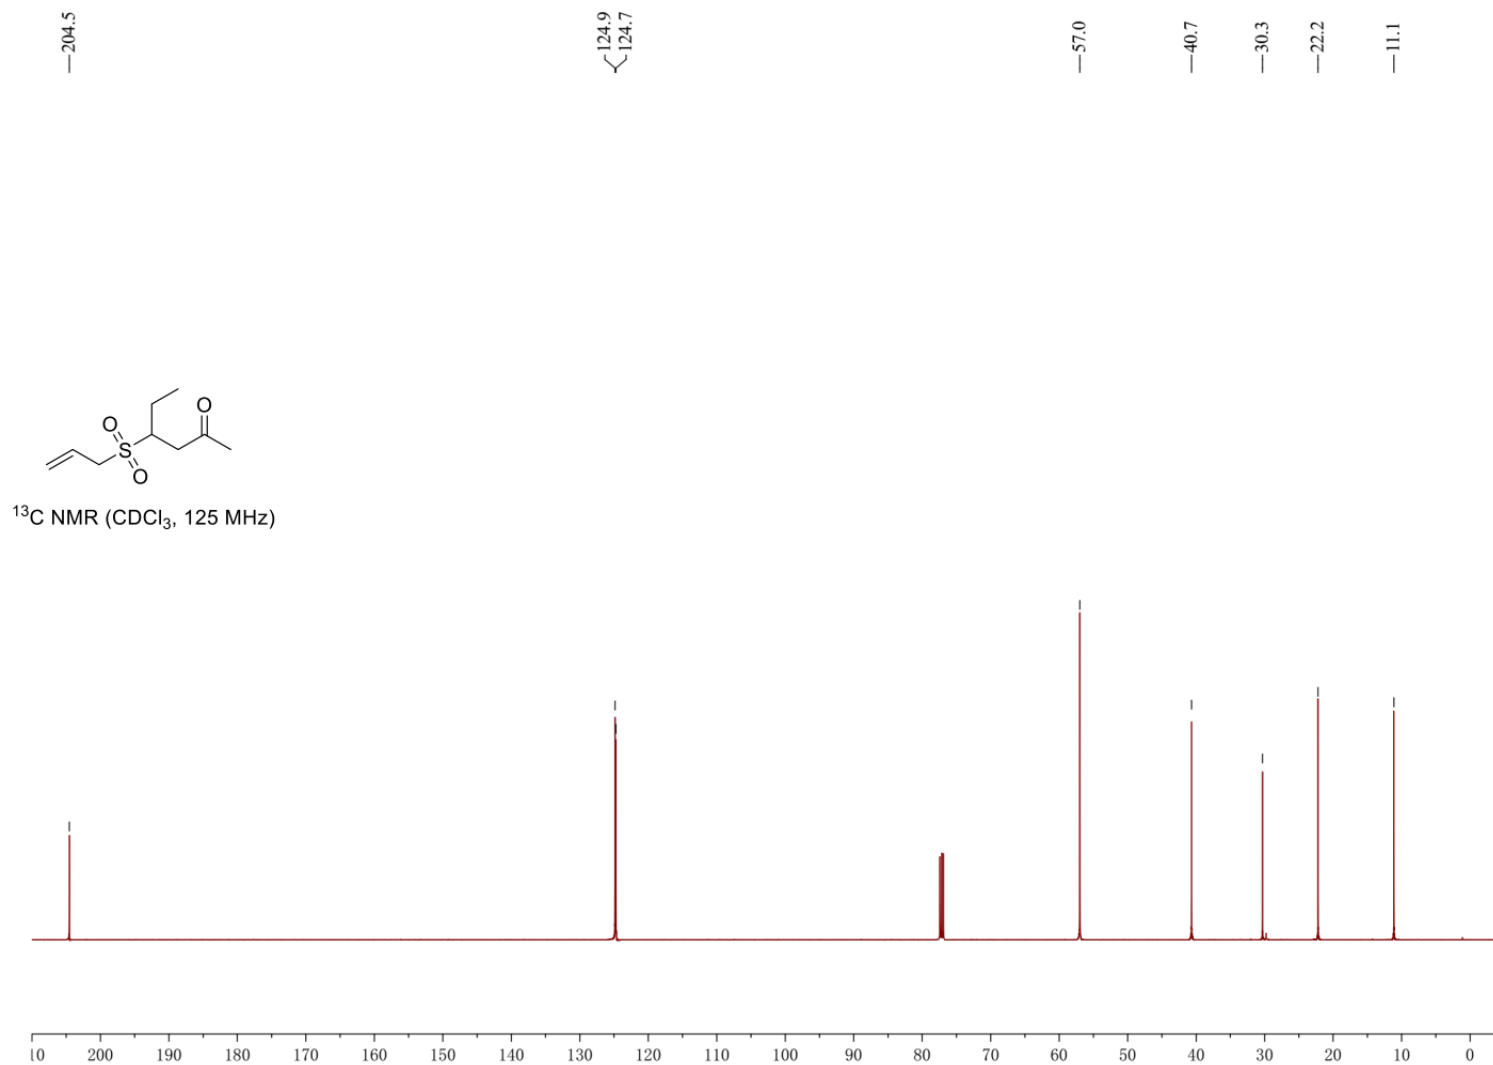

[Go back to table of contents](#)

### 5-Methyl-6-(methylsulfonyl)hexan-2-one (12a)

3.02  
3.01  
2.99  
2.98  
2.94  
2.92  
2.90  
2.89  
2.88  
2.86  
2.56  
2.55  
2.53  
2.52  
2.51  
2.50  
2.50  
2.48  
2.46  
2.23  
2.22  
2.21  
2.19  
2.18  
2.16  
1.87  
1.86  
1.85  
1.84  
1.83  
1.82  
1.81  
1.80  
1.62  
1.60  
1.59  
1.58  
1.56  
1.15  
1.14

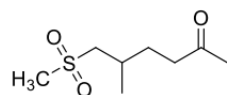

<sup>1</sup>H NMR (CDCl<sub>3</sub>, 500 MHz)

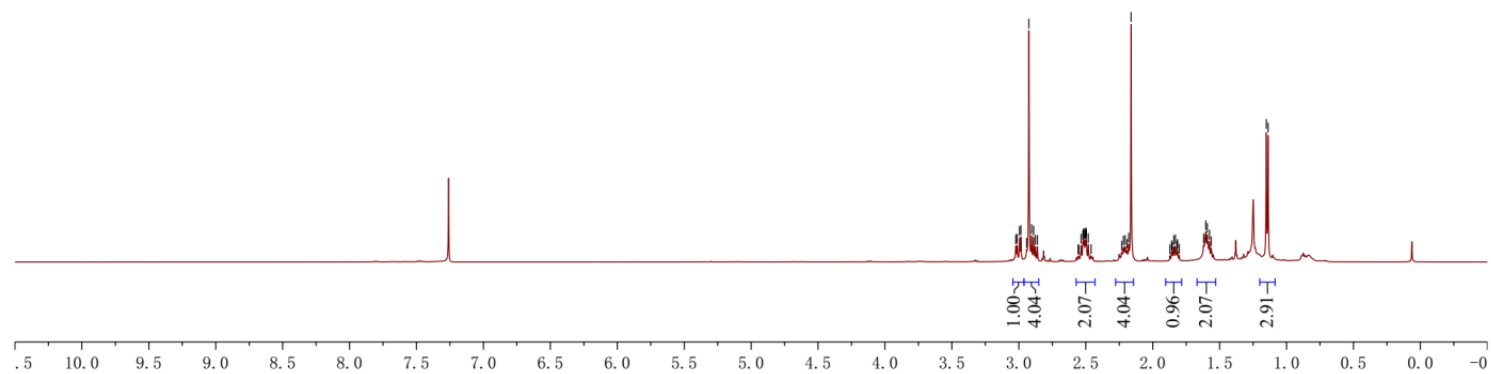

[Go back to table of contents](#)

### 5-Methyl-6-(methylsulfonyl)hexan-2-one (12a)

—208.2

—61.0

—42.0

—40.7

—30.4

—30.1

—28.1

—20.1

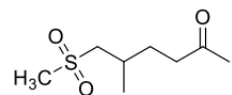

$^{13}\text{C}$  NMR ( $\text{CDCl}_3$ , 125 MHz)

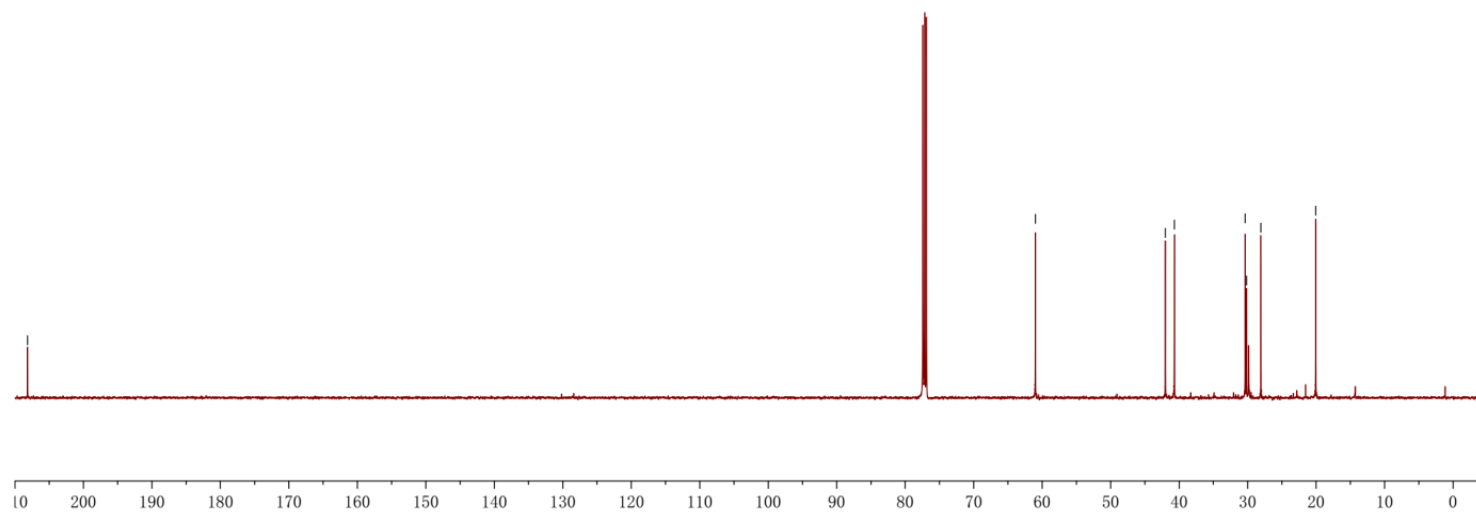

[Go back to table of contents](#)

### 5-Methyl-5-(methylsulfonyl)hexan-2-one (12b)

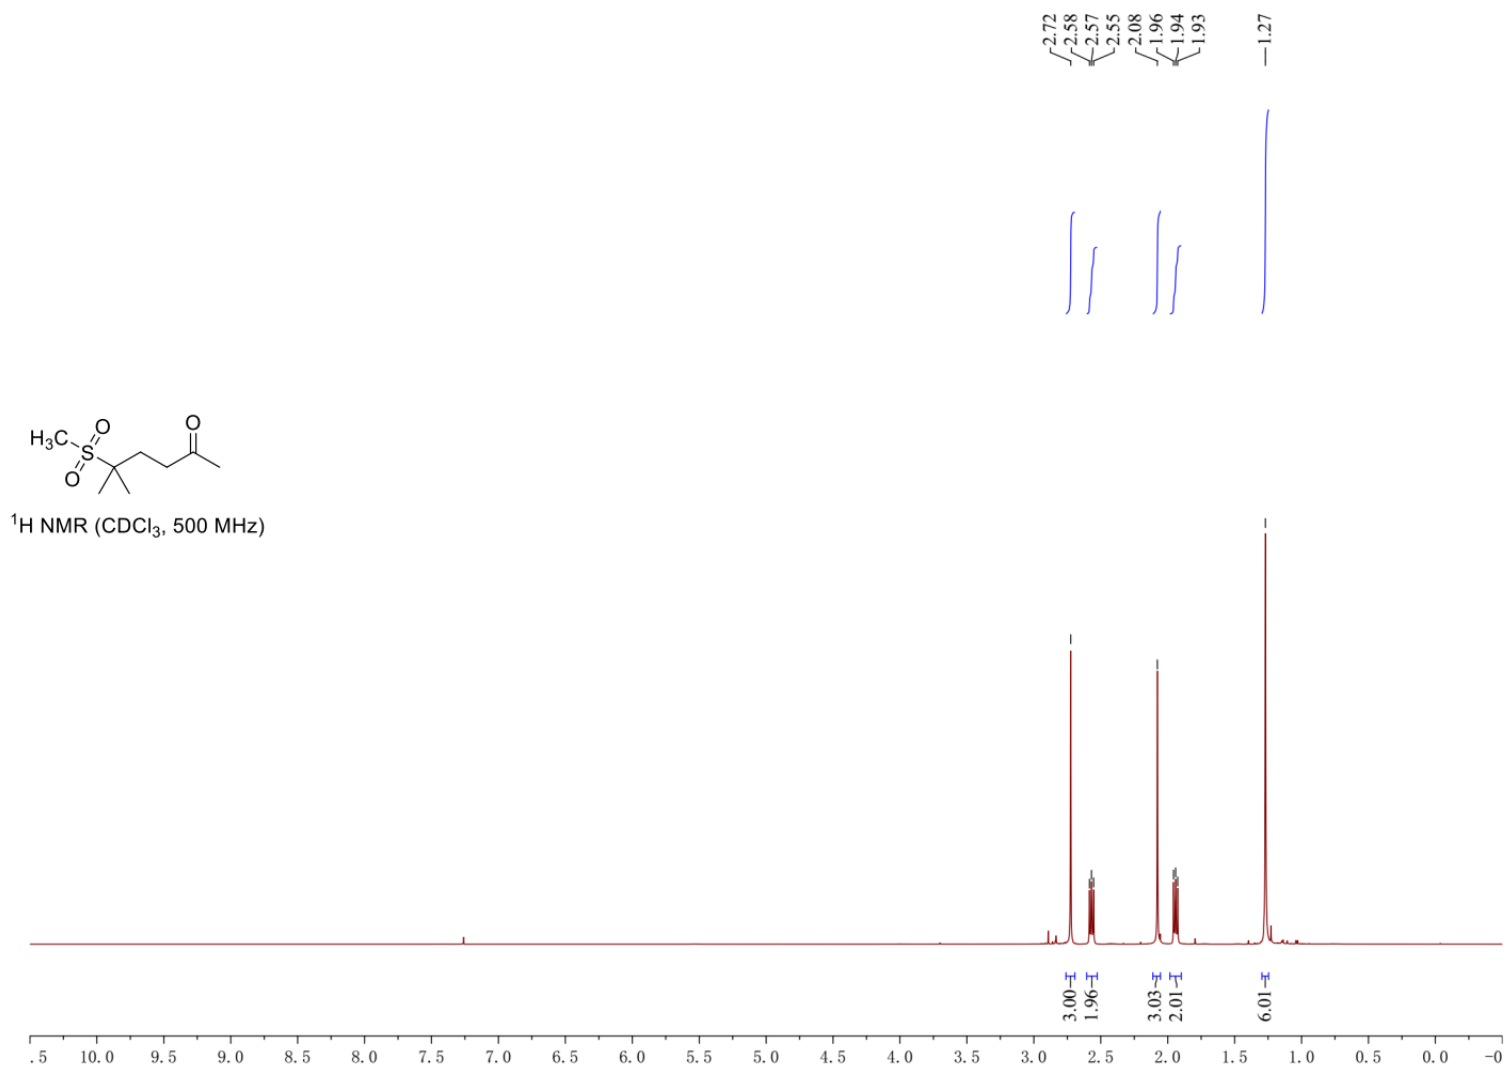

[Go back to table of contents](#)

### 5-Methyl-5-(methylsulfonyl)hexan-2-one (12b)

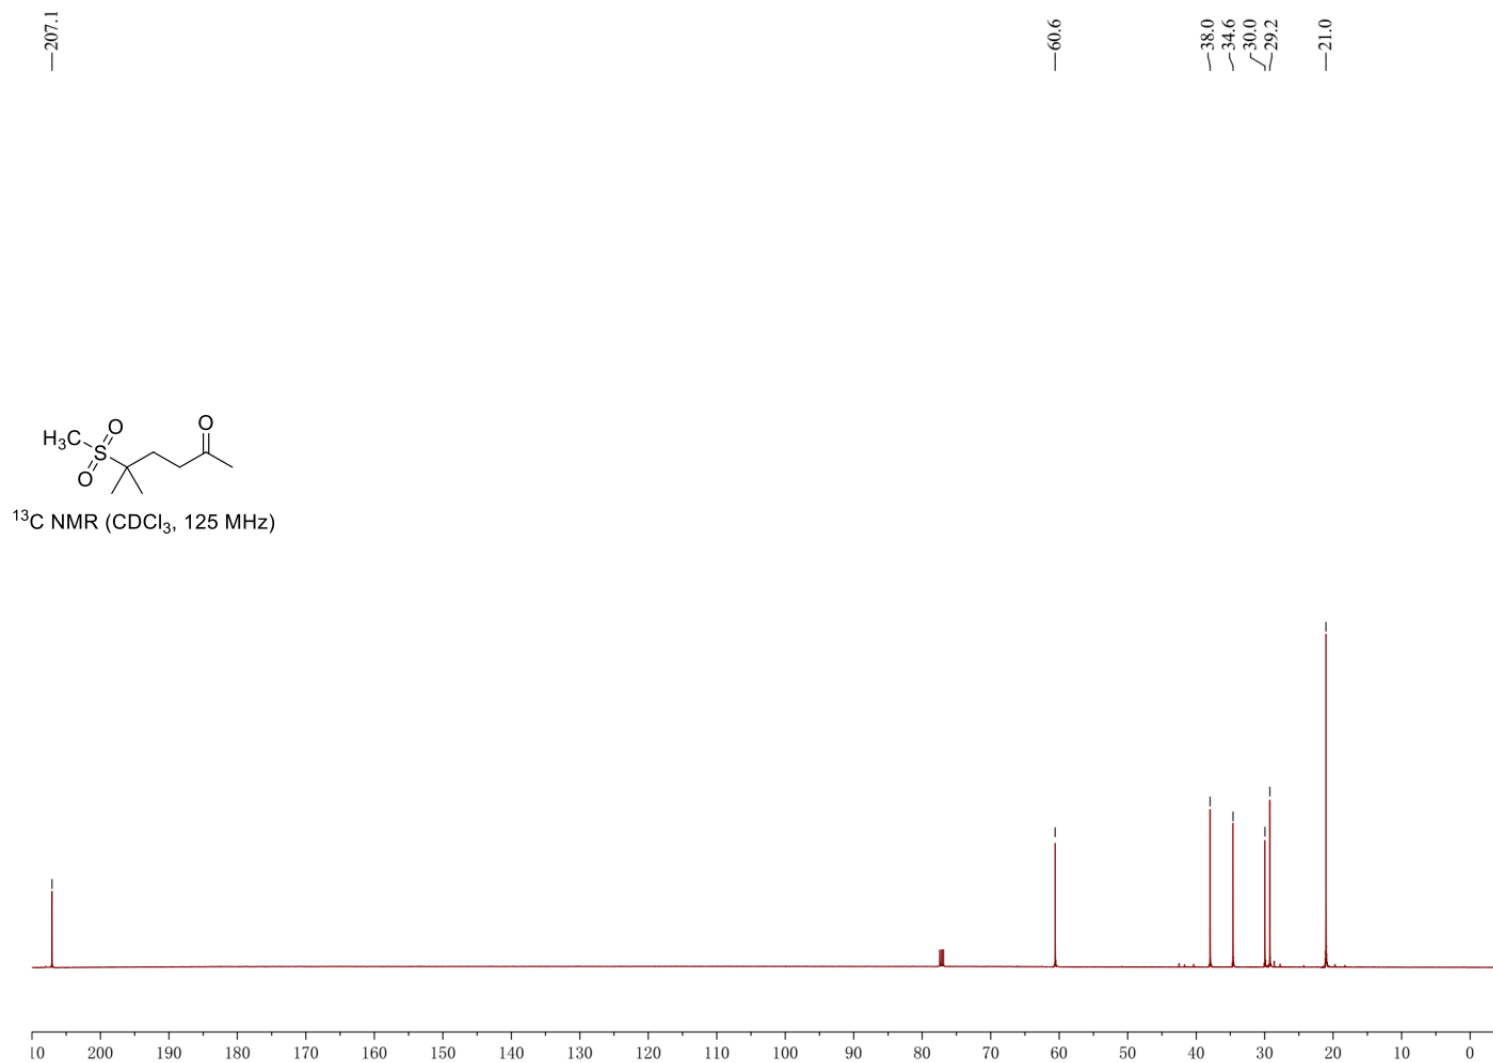

[Go back to table of contents](#)

### 5-Methyl-4-(methylsulfonyl)hexan-2-one (12c)

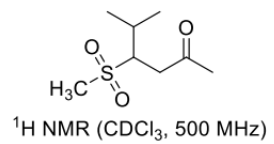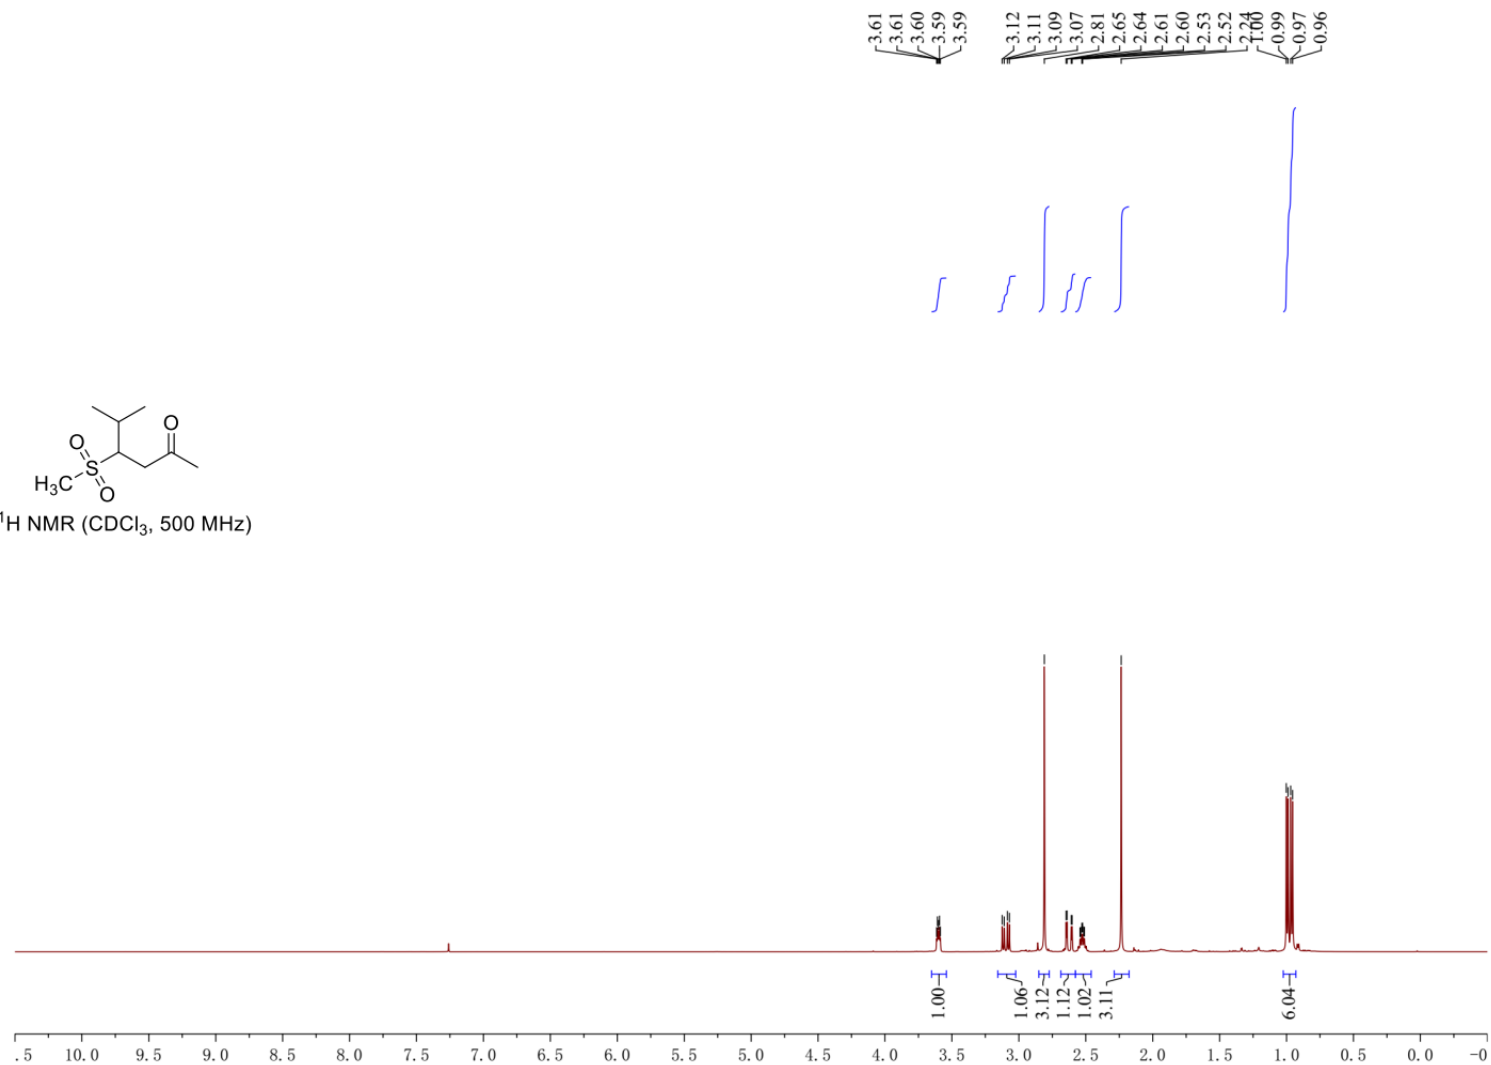

### 5-Methyl-4-(methylsulfonyl)hexan-2-one (12c)

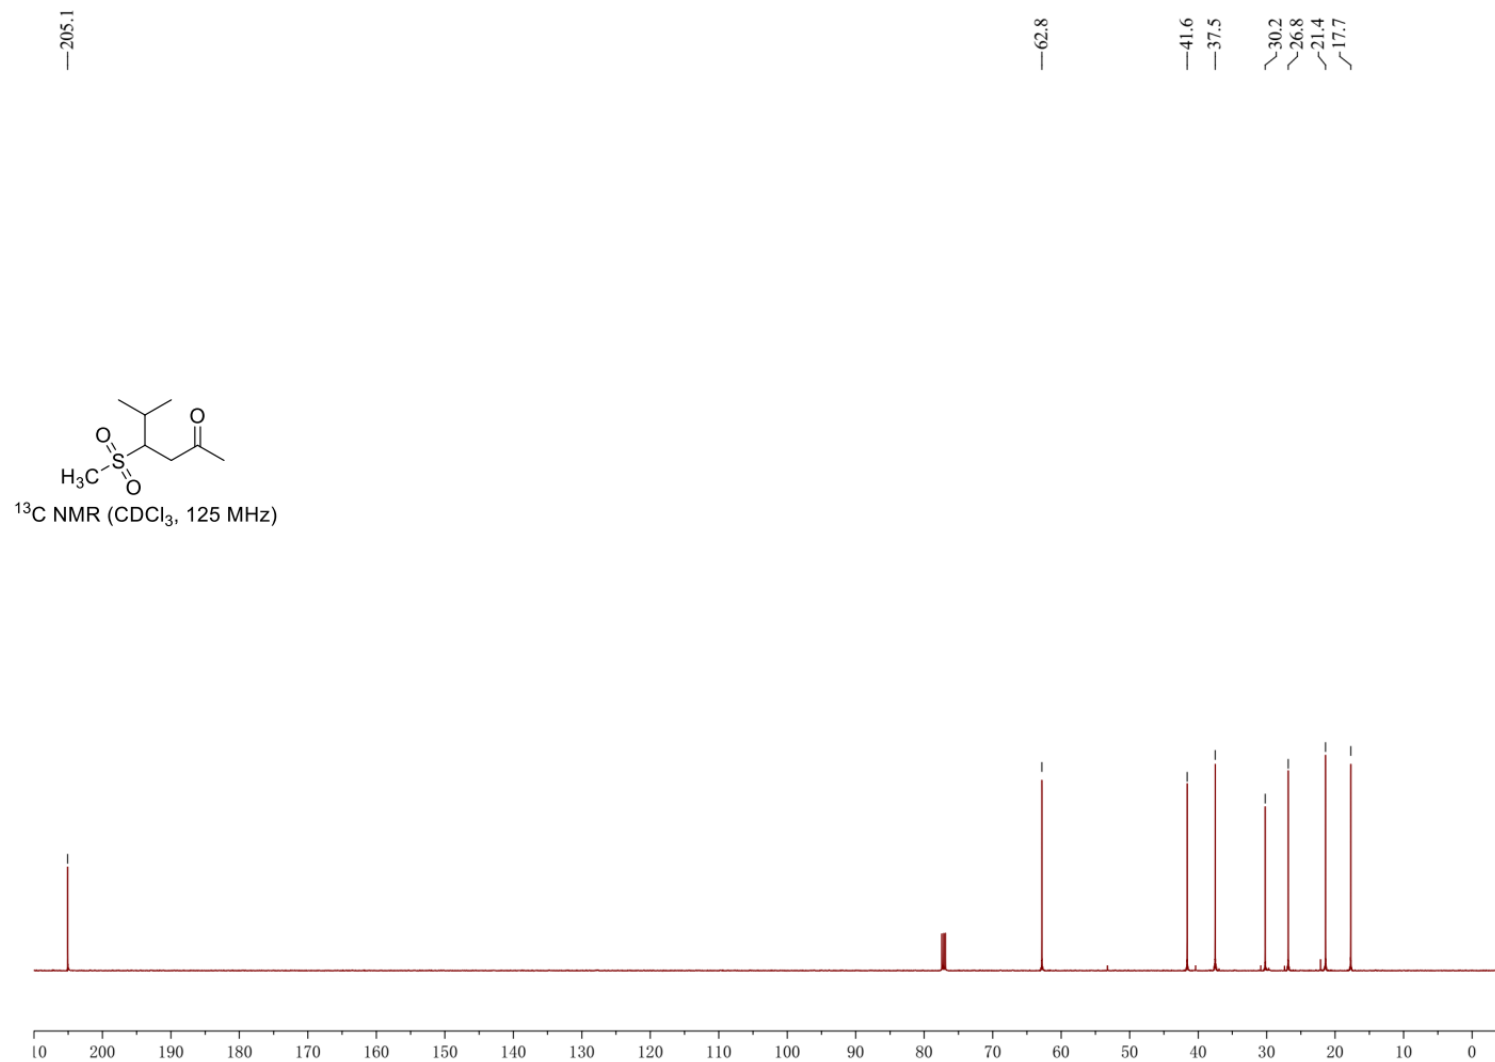

[Go back to table of contents](#)



### 2,6-Dimethyl-1-(methylsulfonyl)heptan-4-one (13a)

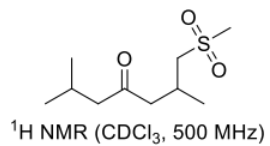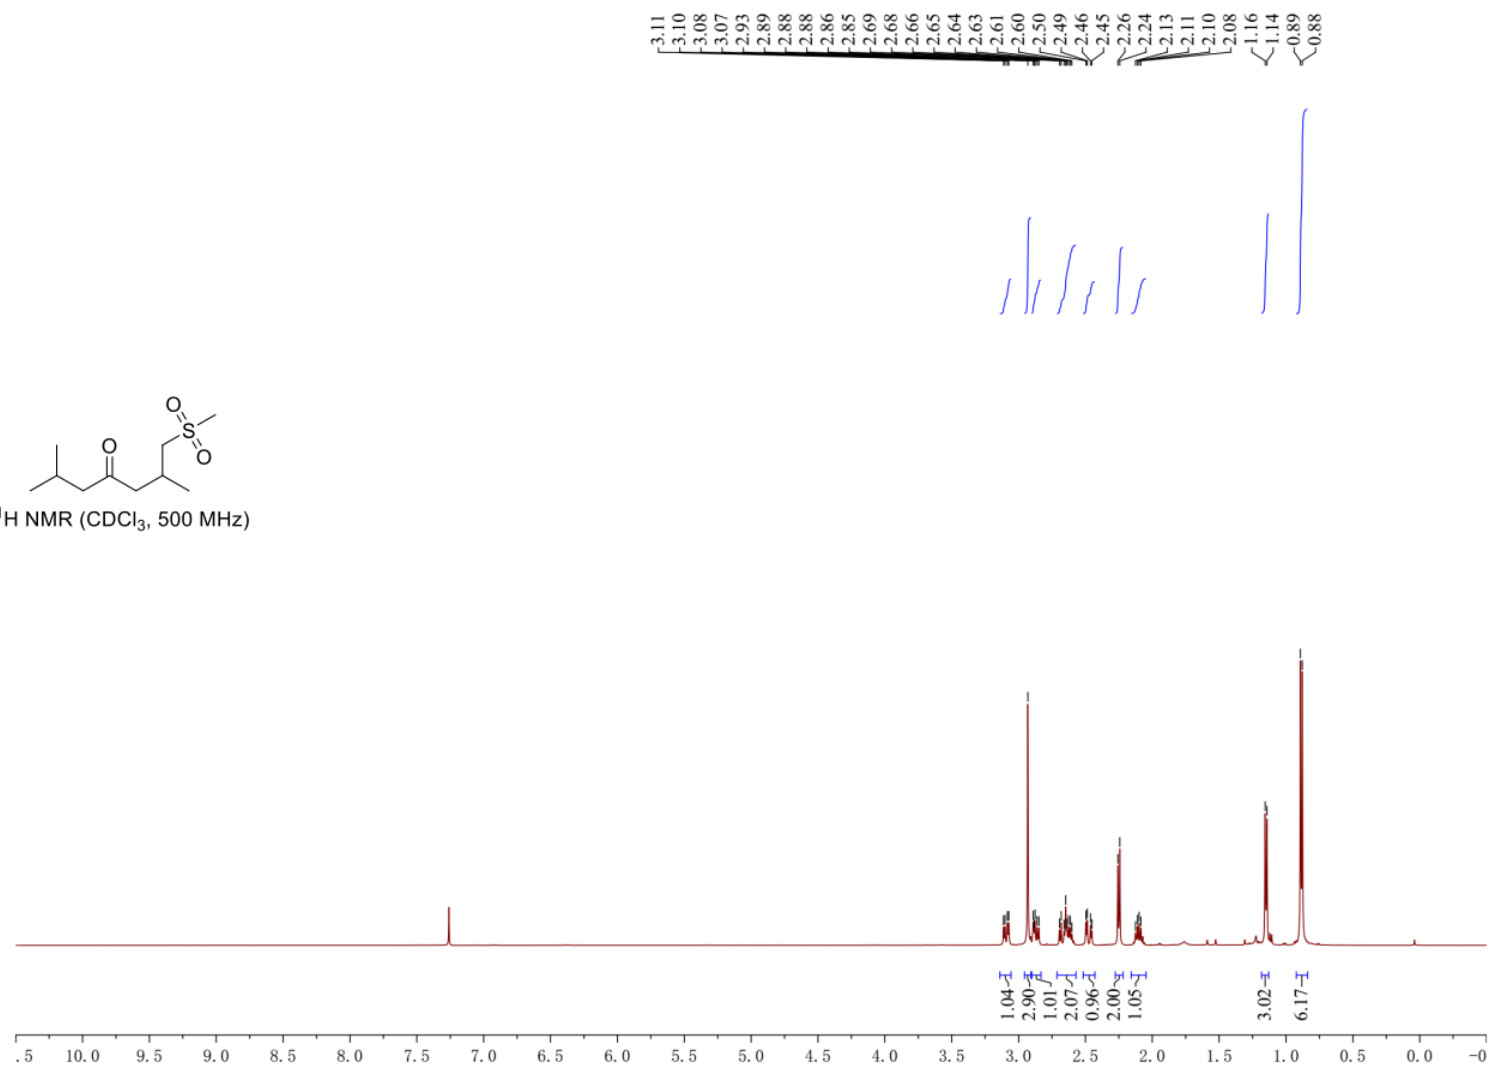

[Go back to table of contents](#)

### 2,6-Dimethyl-1-(methylsulfonyl)heptan-4-one (13a)

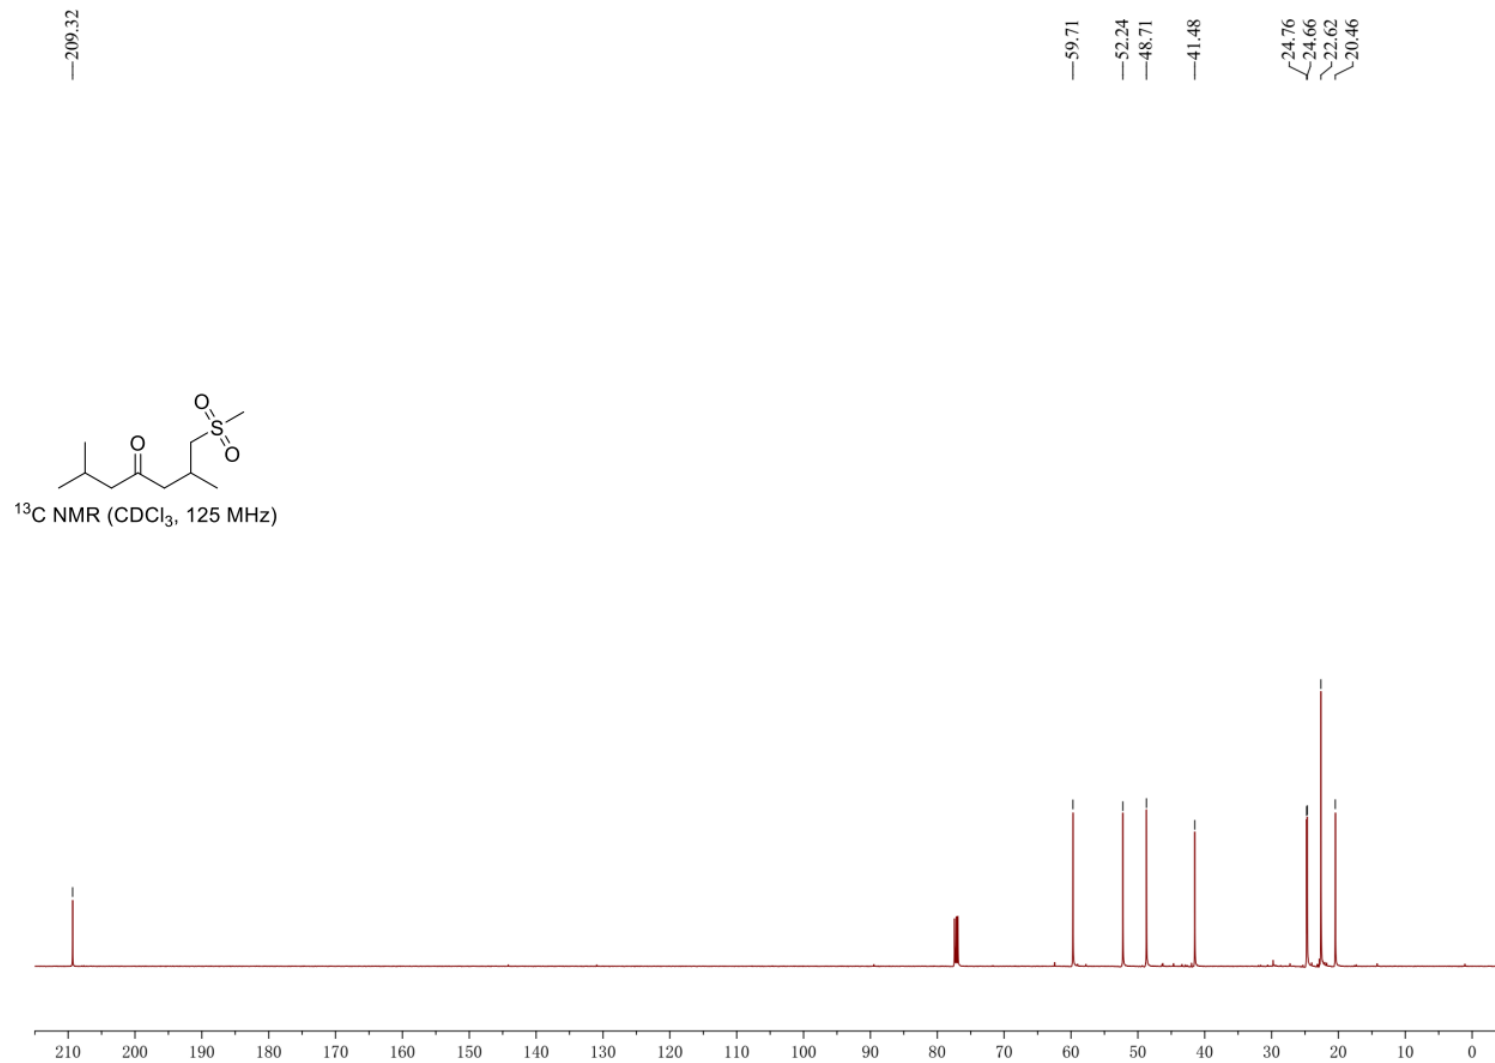

[Go back to table of contents](#)

### 2,6-Dimethyl-2-(methylsulfonyl)heptan-4-one (13b)

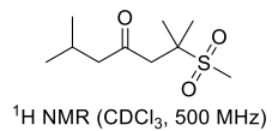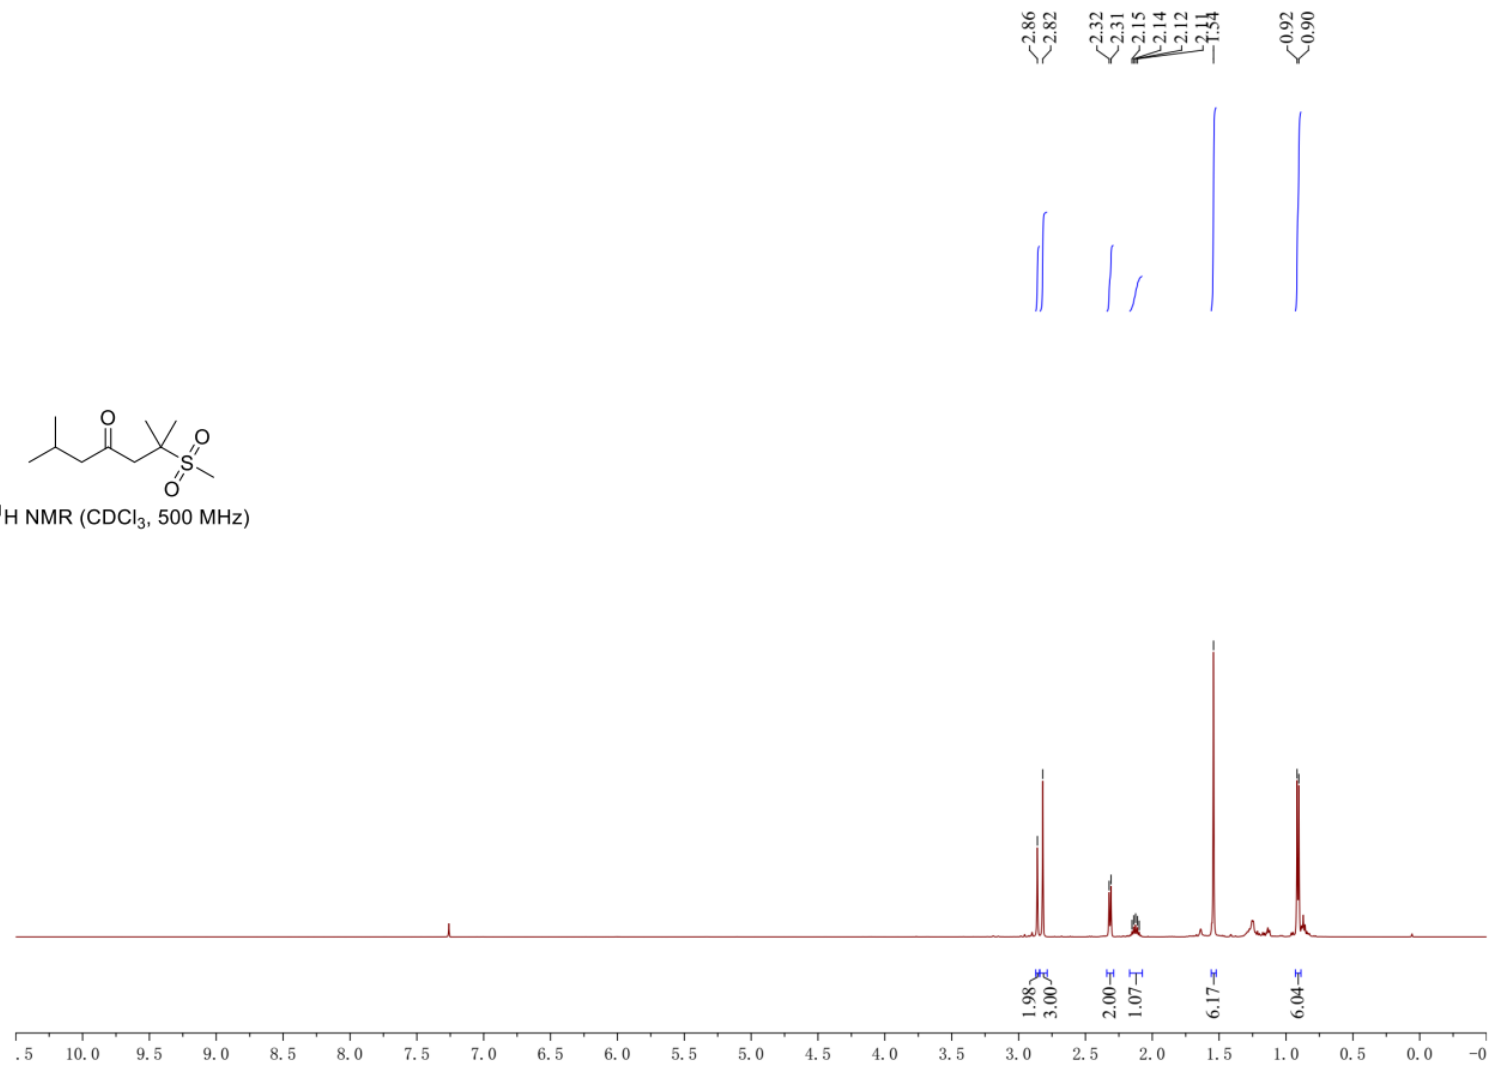

[Go back to table of contents](#)

### 2,6-Dimethyl-2-(methylsulfonyl)heptan-4-one (13b)

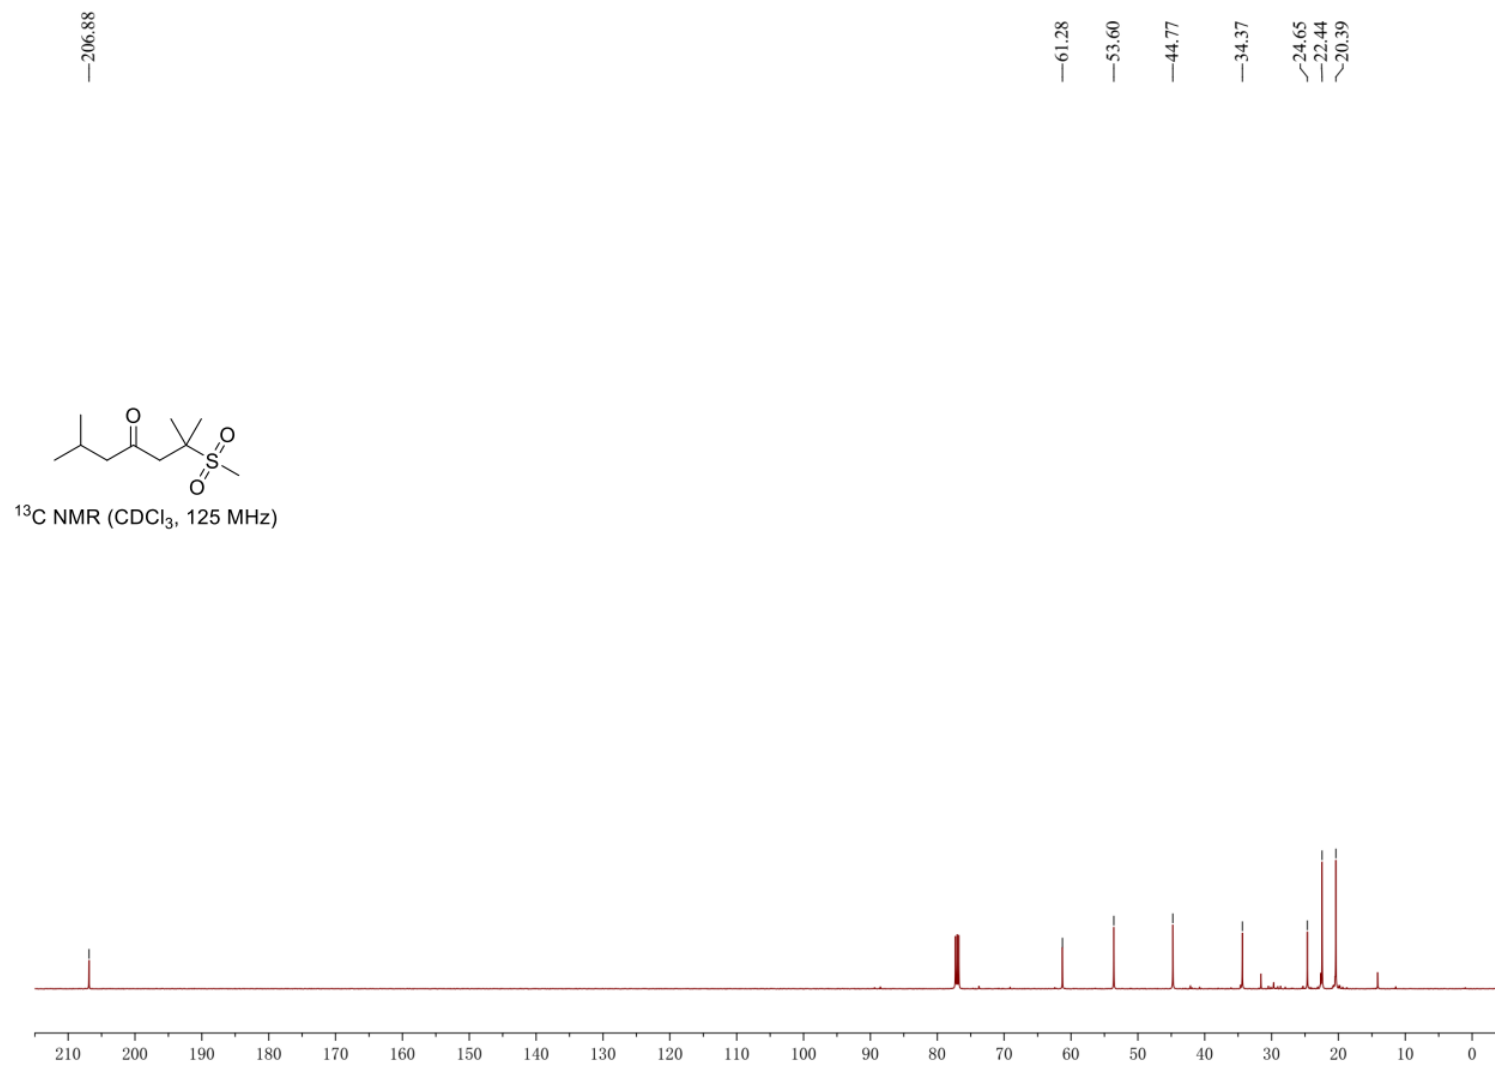

[Go back to table of contents](#)

### 1-(Allylsulfonyl)adamantan-2-one (14a)

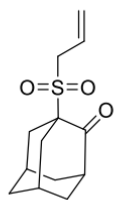

$^1\text{H}$  NMR ( $\text{CDCl}_3$ , 500 MHz)

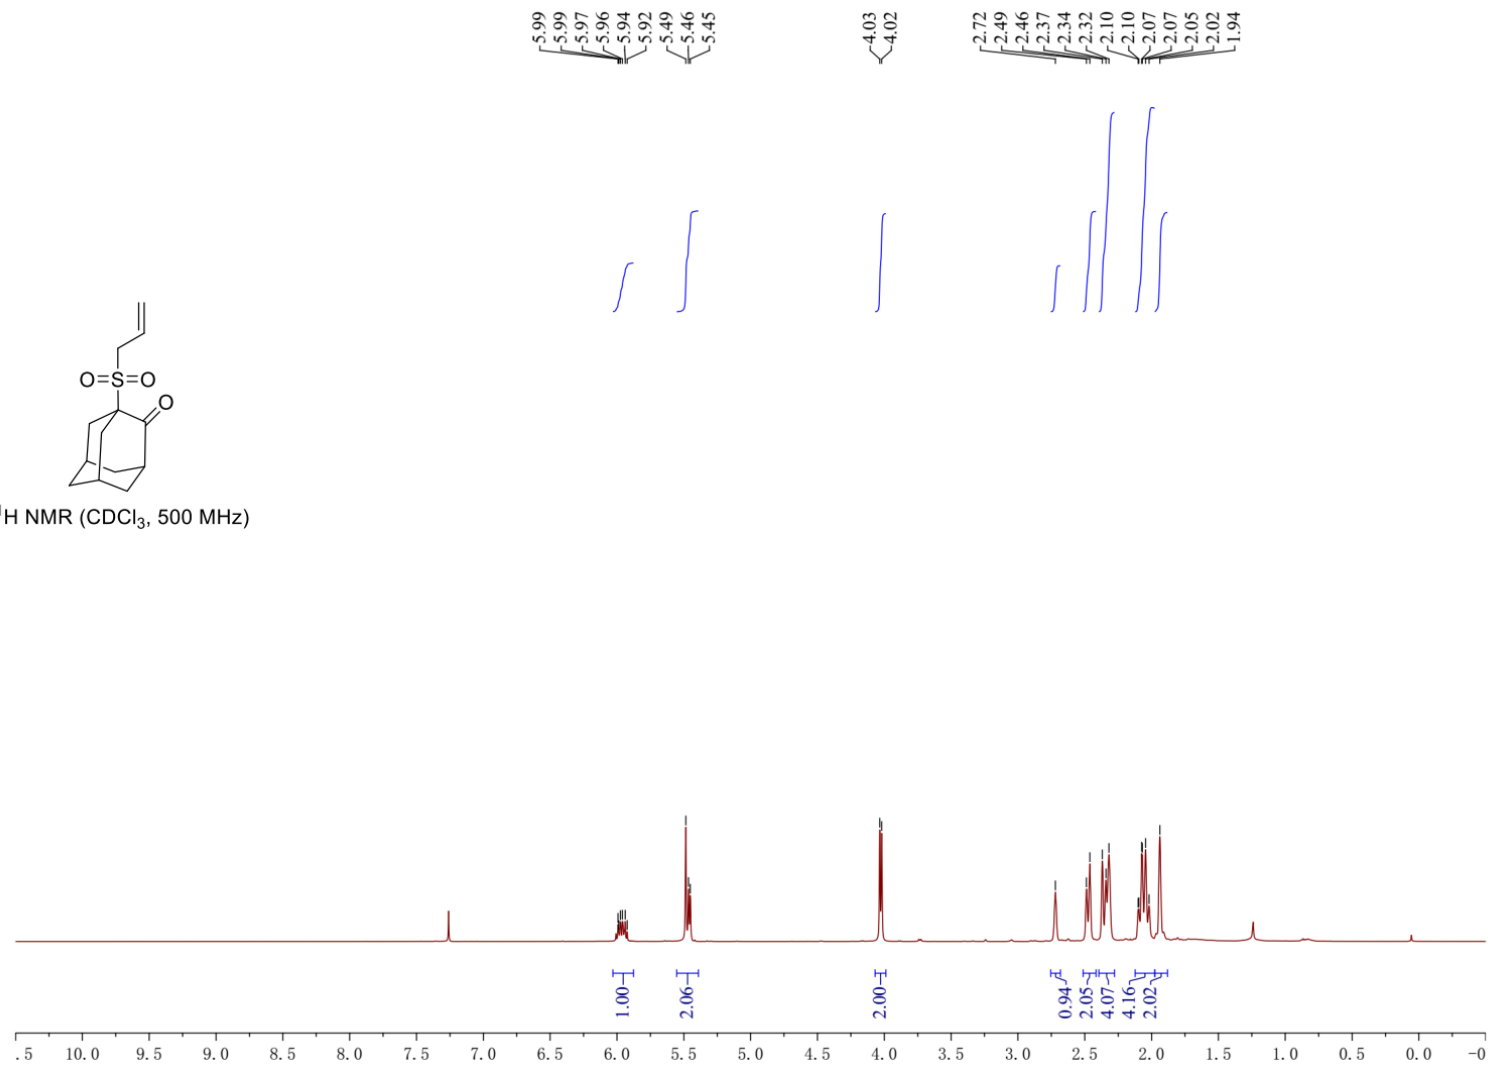

[Go back to table of contents](#)

### 1-(Allylsulfonyl)adamantan-2-one (14a)

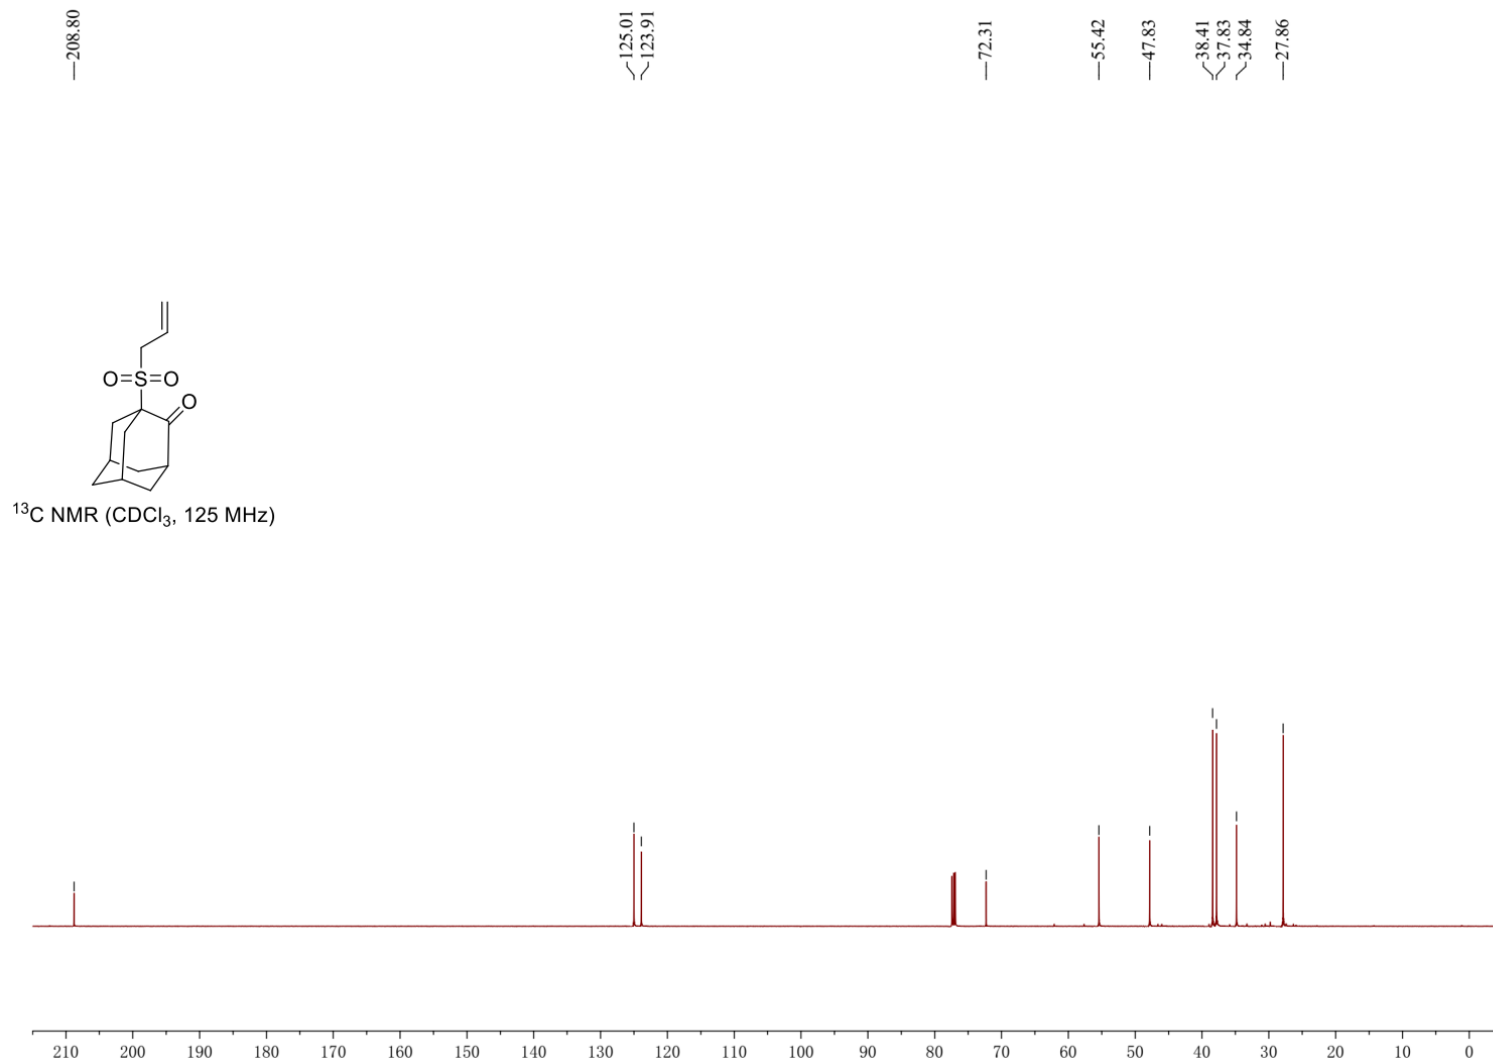

[Go back to table of contents](#)

### 4-(Allylsulfonyl)adamantan-2-one (14b)

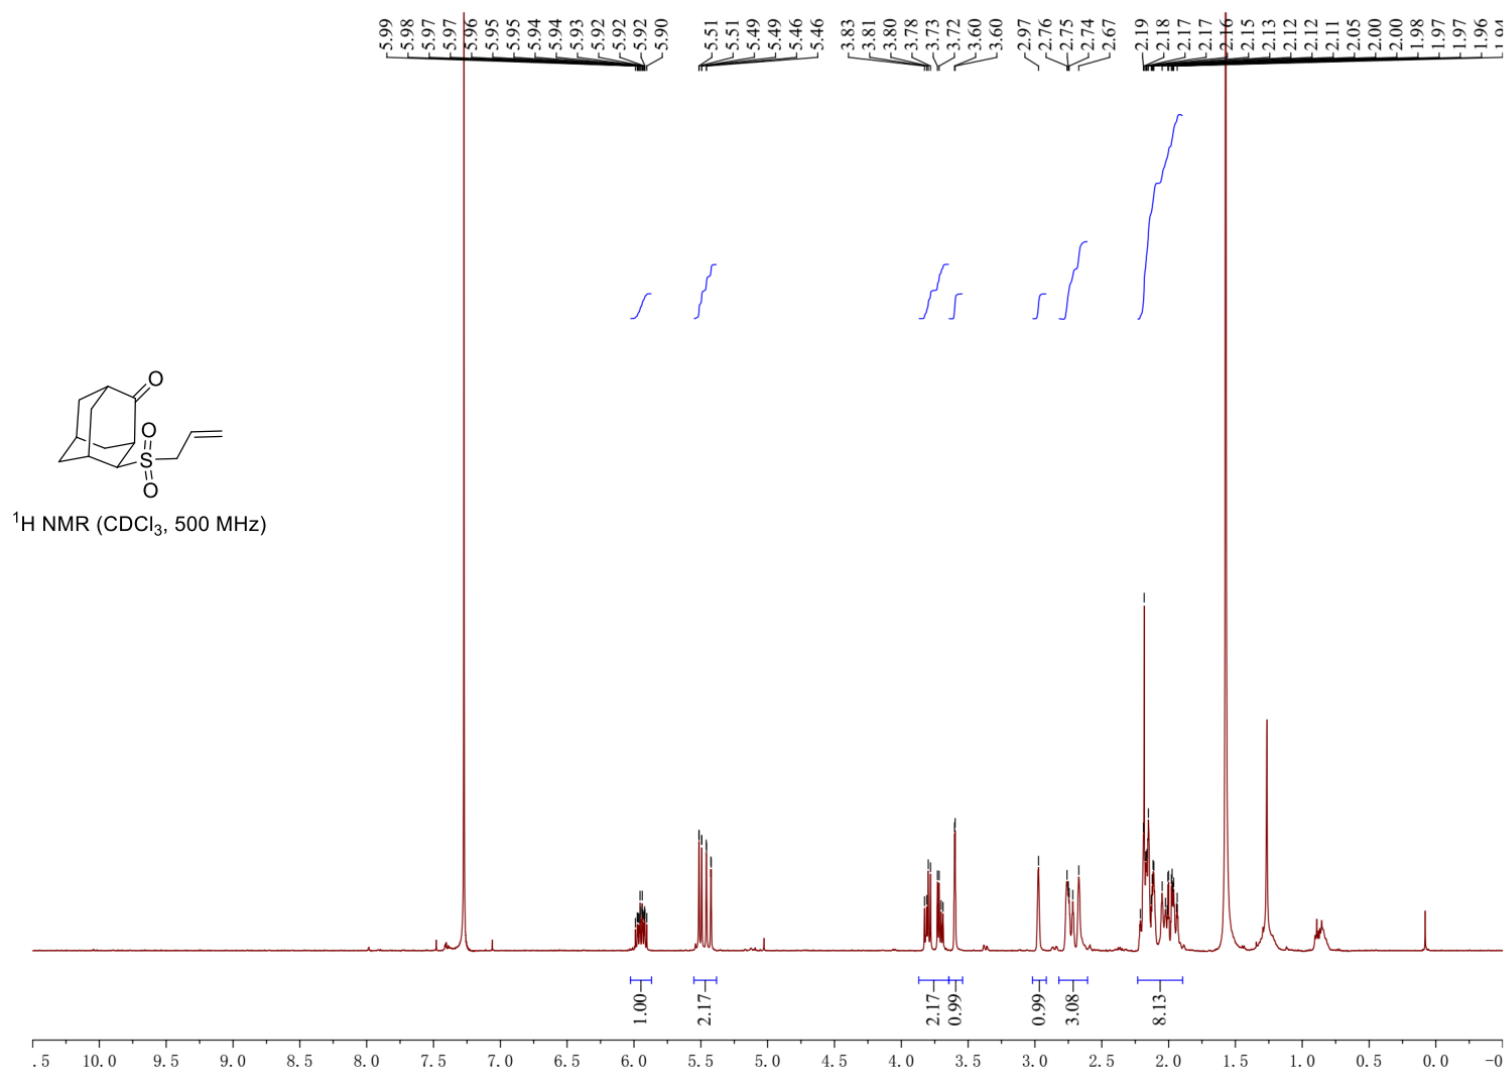

[Go back to table of contents](#)

### 4-(Allylsulfonyl)adamantan-2-one (14b)

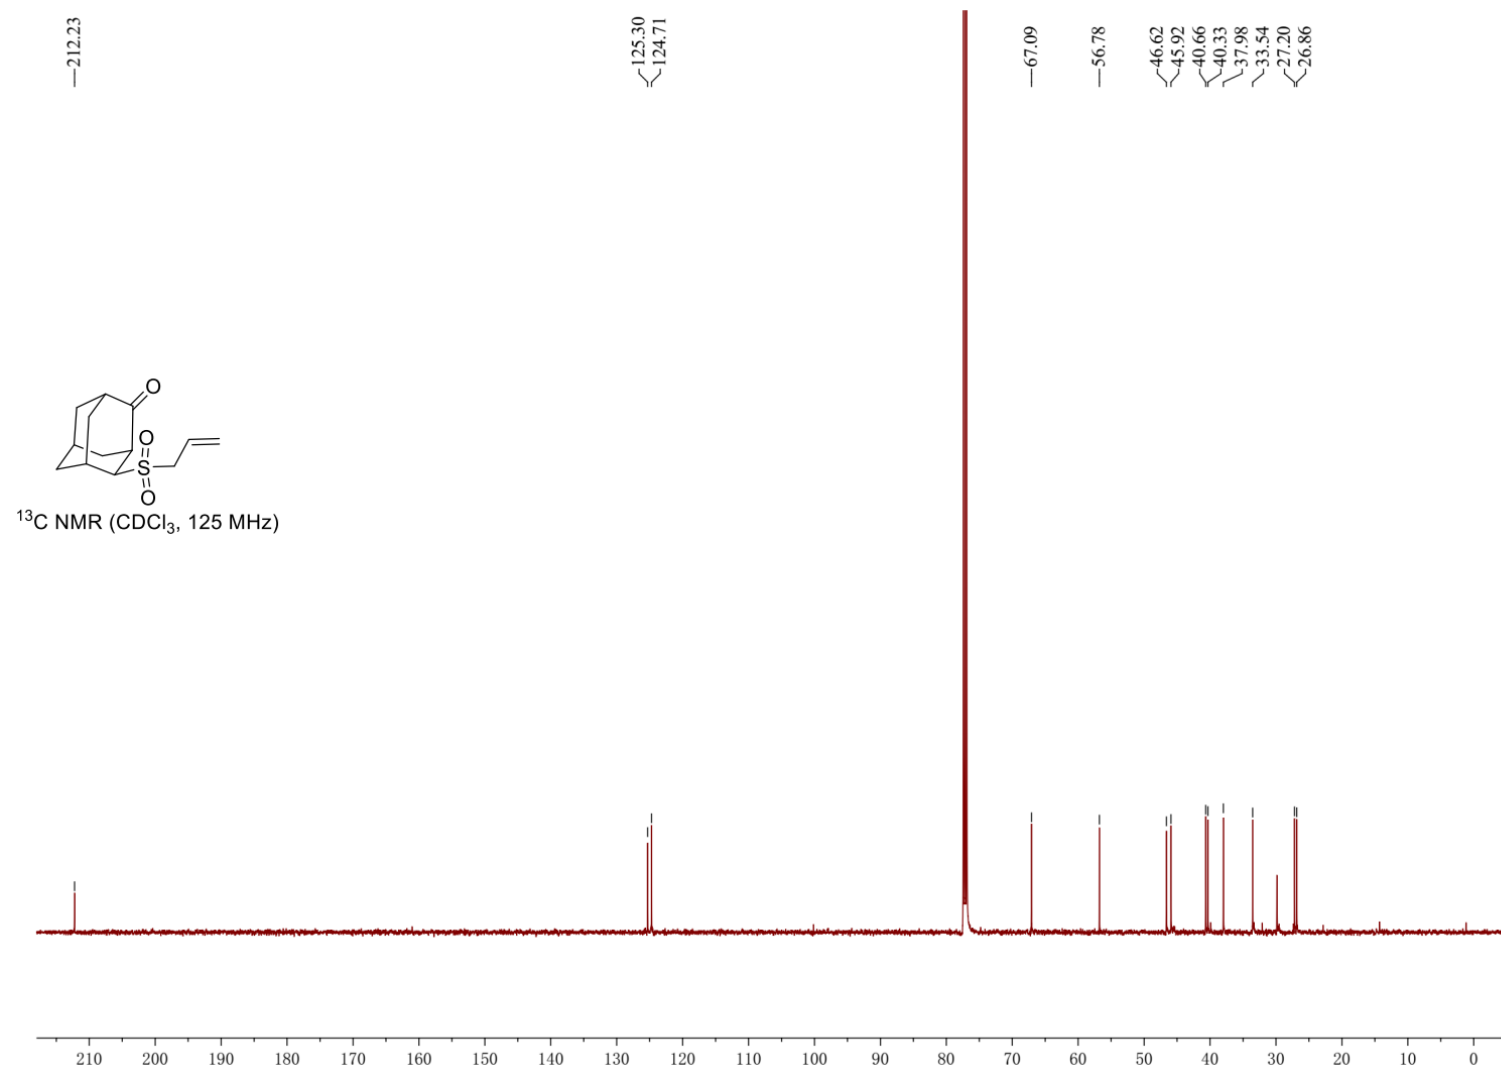

[Go back to table of contents](#)



### 5-(Allylsulfonyl)adamantan-2-one (14c)

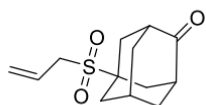

$^1\text{H}$  NMR ( $\text{CDCl}_3$ , 500 MHz)

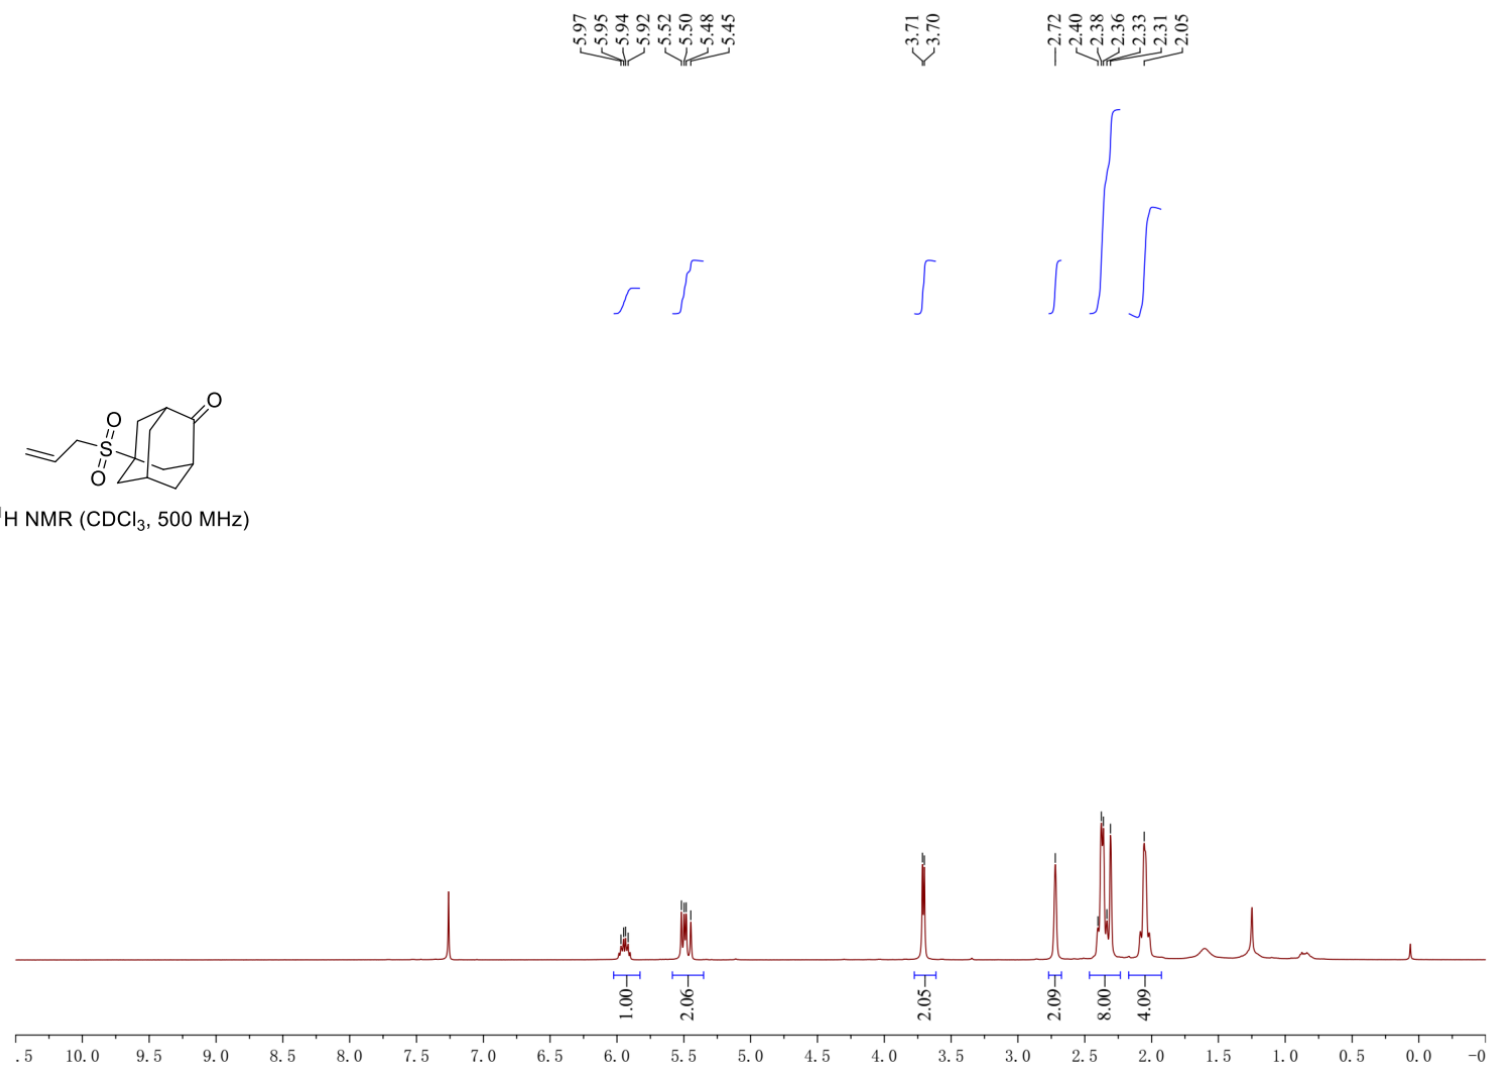

[Go back to table of contents](#)

### 5-(Allylsulfonyl)adamantan-2-one (14c)

—214.05

~124.95  
~124.04

—60.33

—51.85

—45.51

~37.94

~36.66

~34.16

—27.68

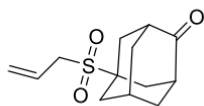

<sup>13</sup>C NMR (CDCl<sub>3</sub>, 125 MHz)

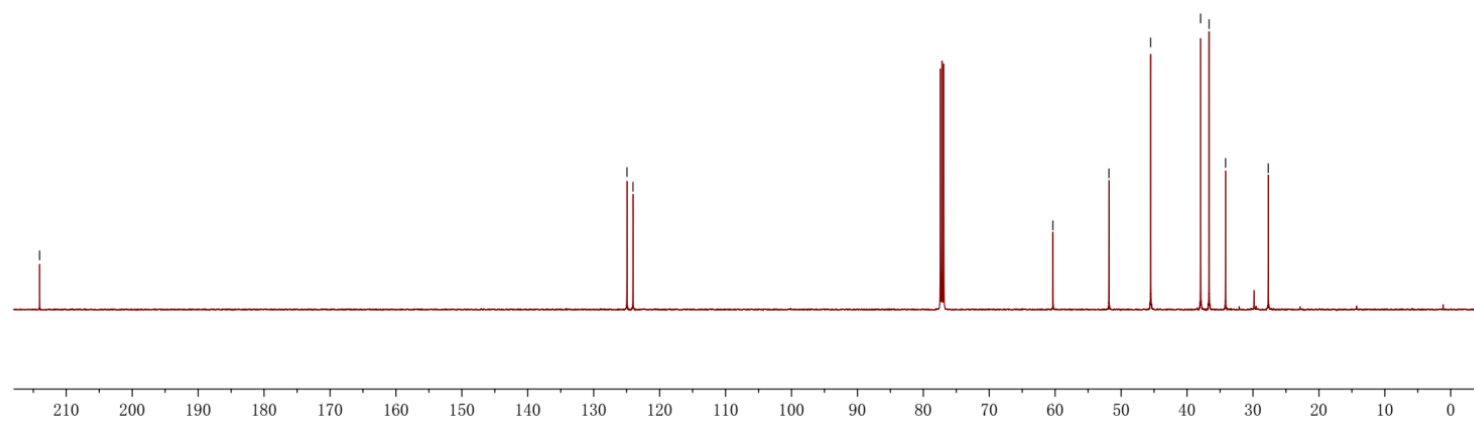

[Go back to table of contents](#)

### 6-(Allylsulfonyl)adamantan-2-one (14d)

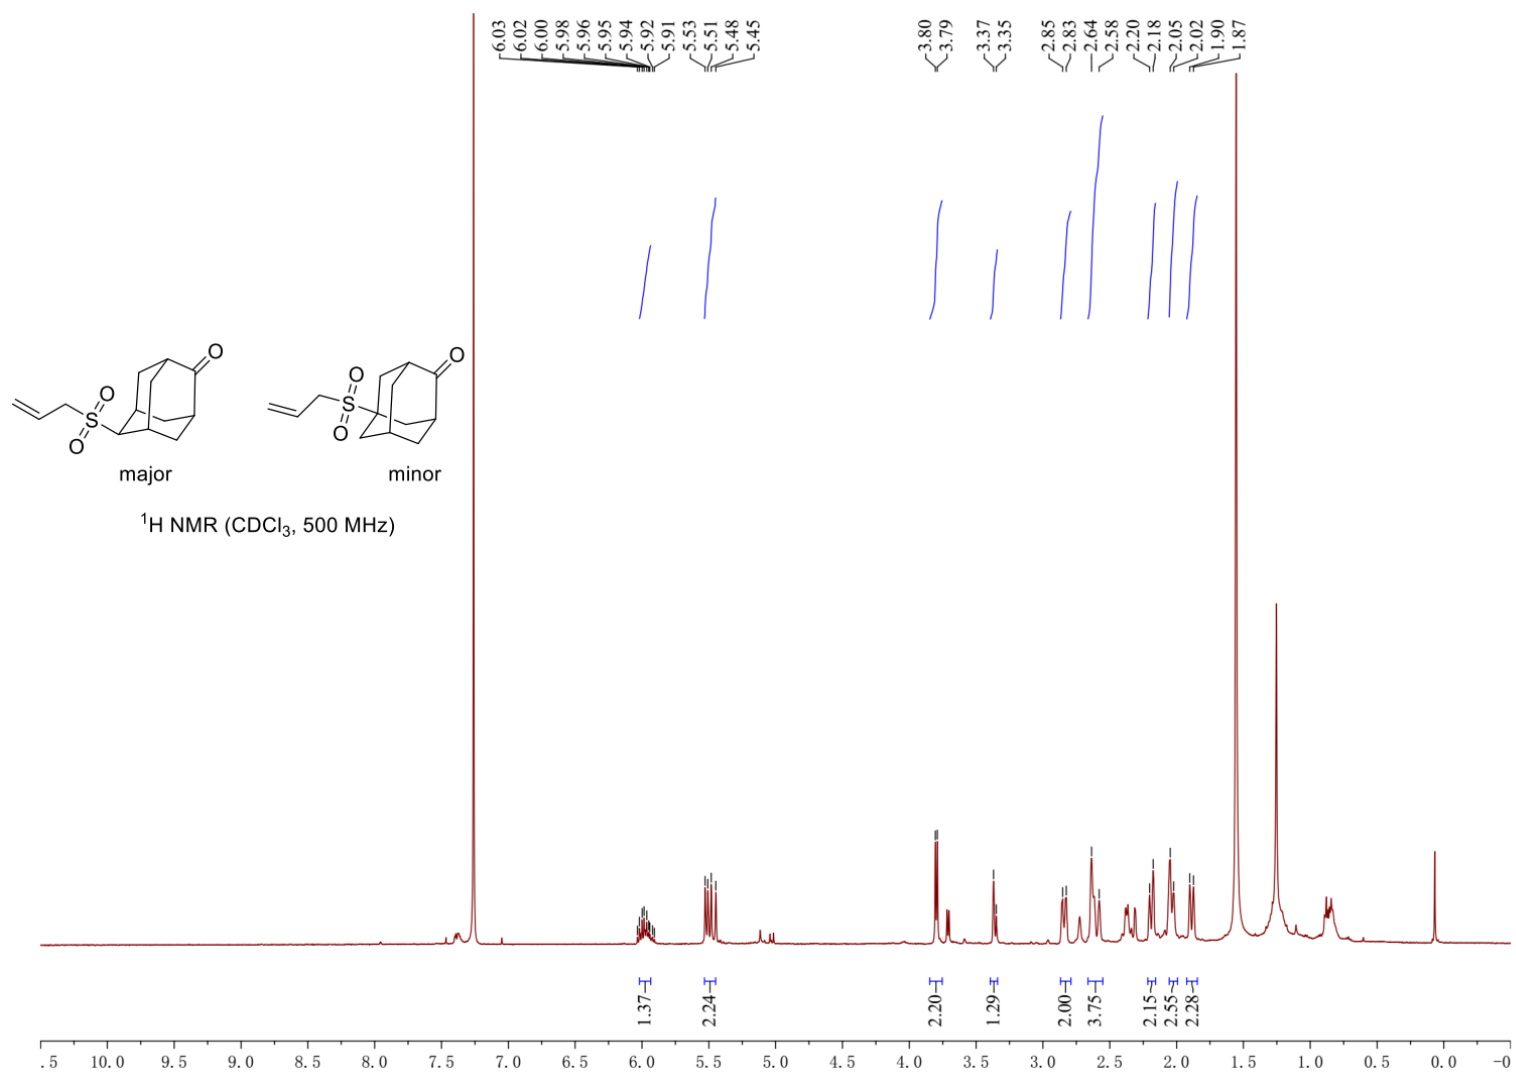

[Go back to table of contents](#)

### 6-(Allylsulfonyl)adamantan-2-one (14d)

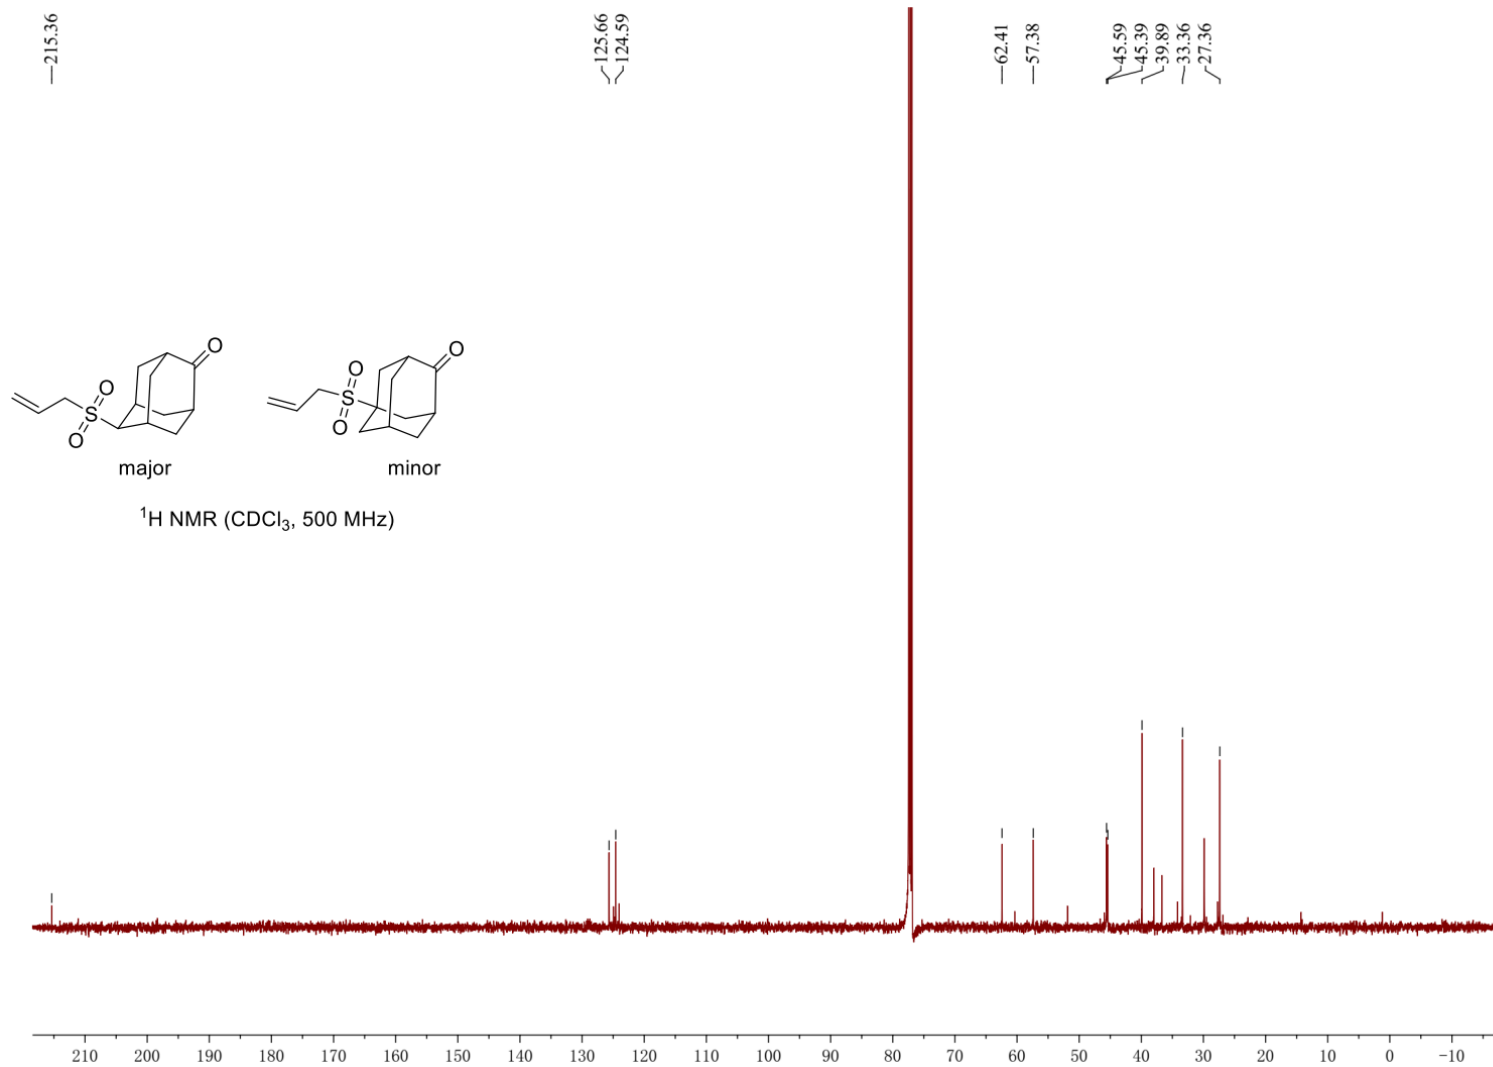

[Go back to table of contents](#)

### Methyl 4-(allylsulfonyl)butanoate (15a)

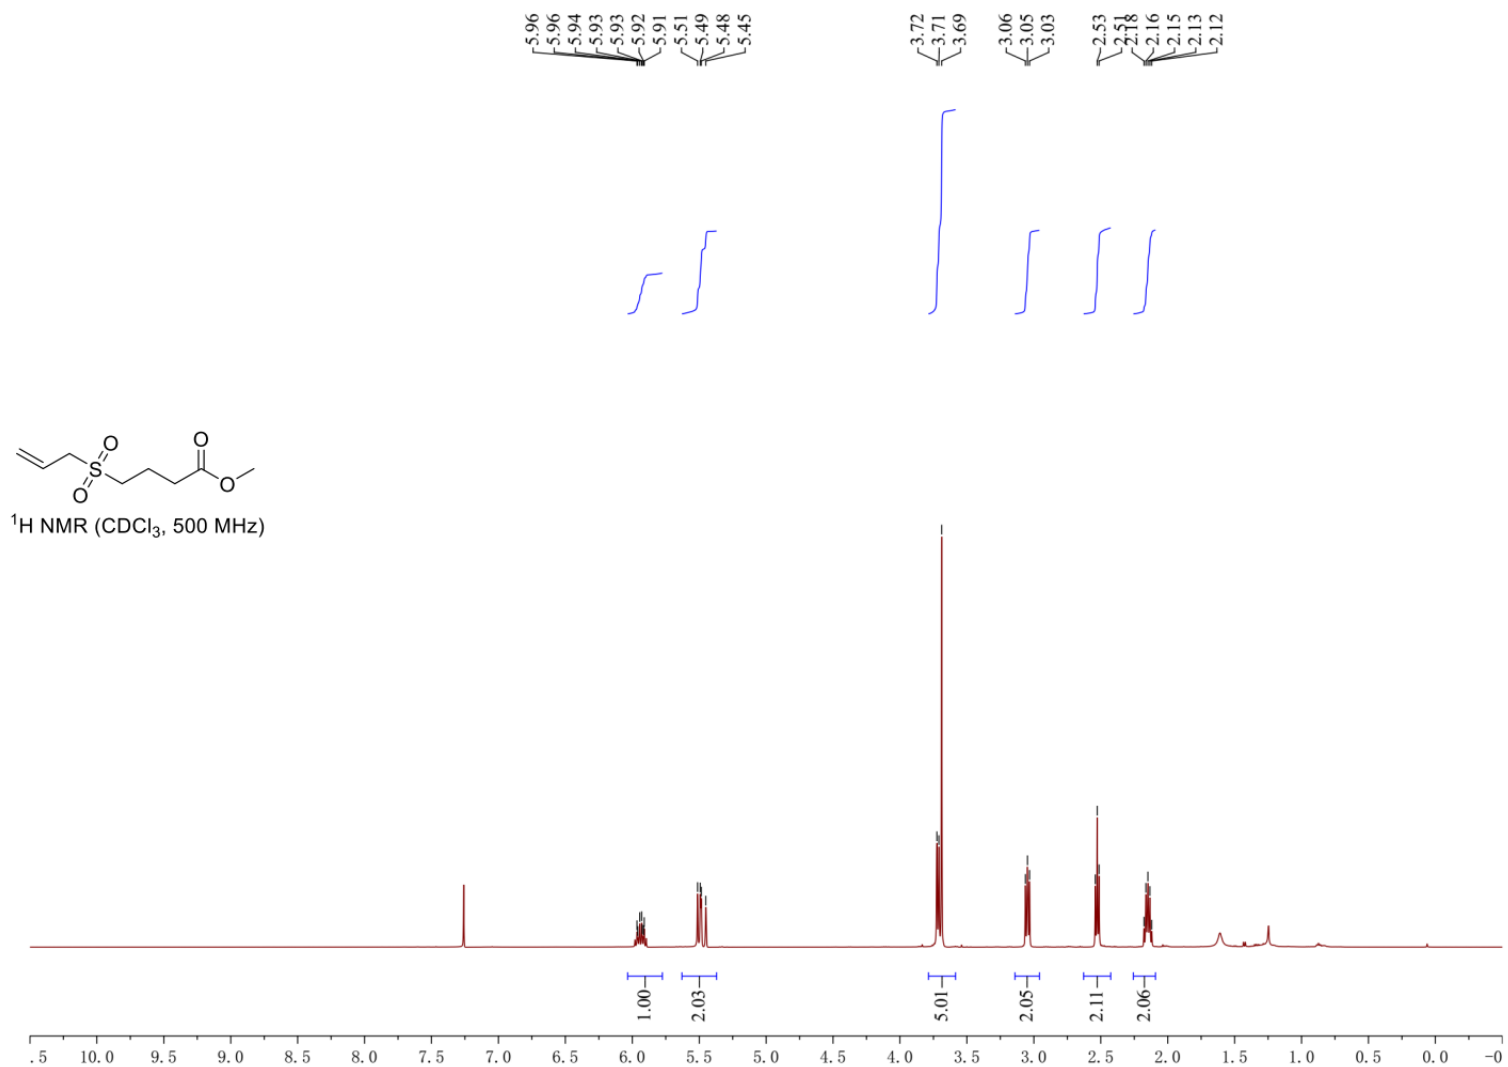

[Go back to table of contents](#)

### Methyl 4-(allylsulfonyl)butanoate (15a)

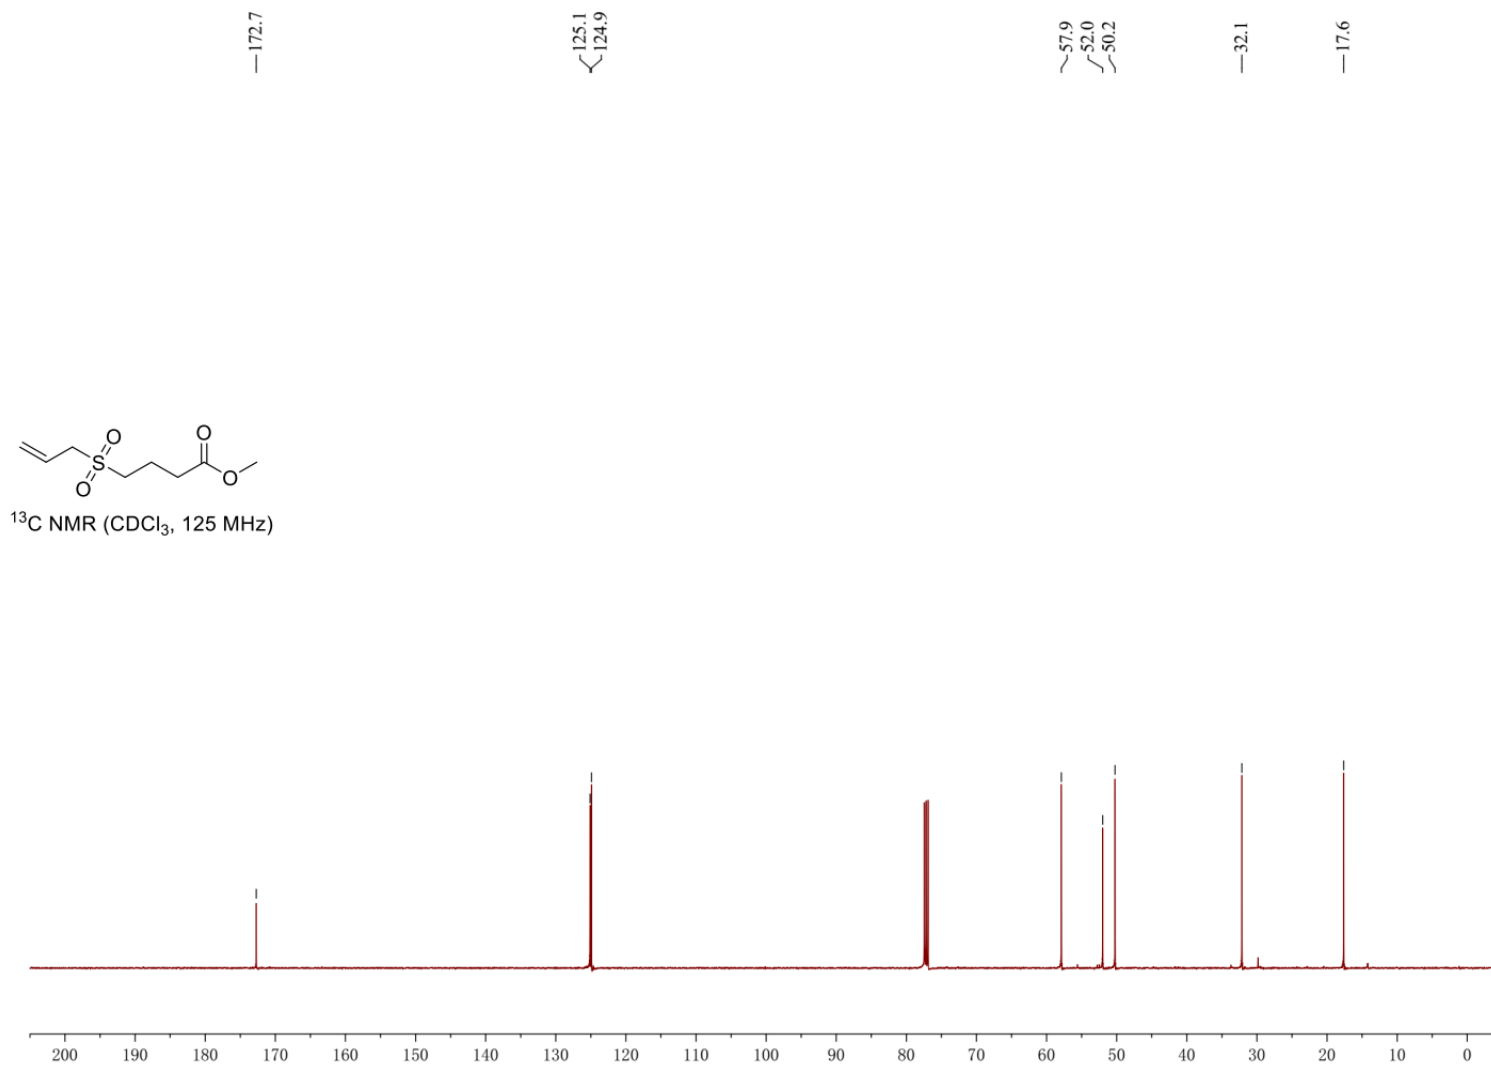

[Go back to table of contents](#)

### Methyl 3-(allylsulfonyl)butanoate (15b)

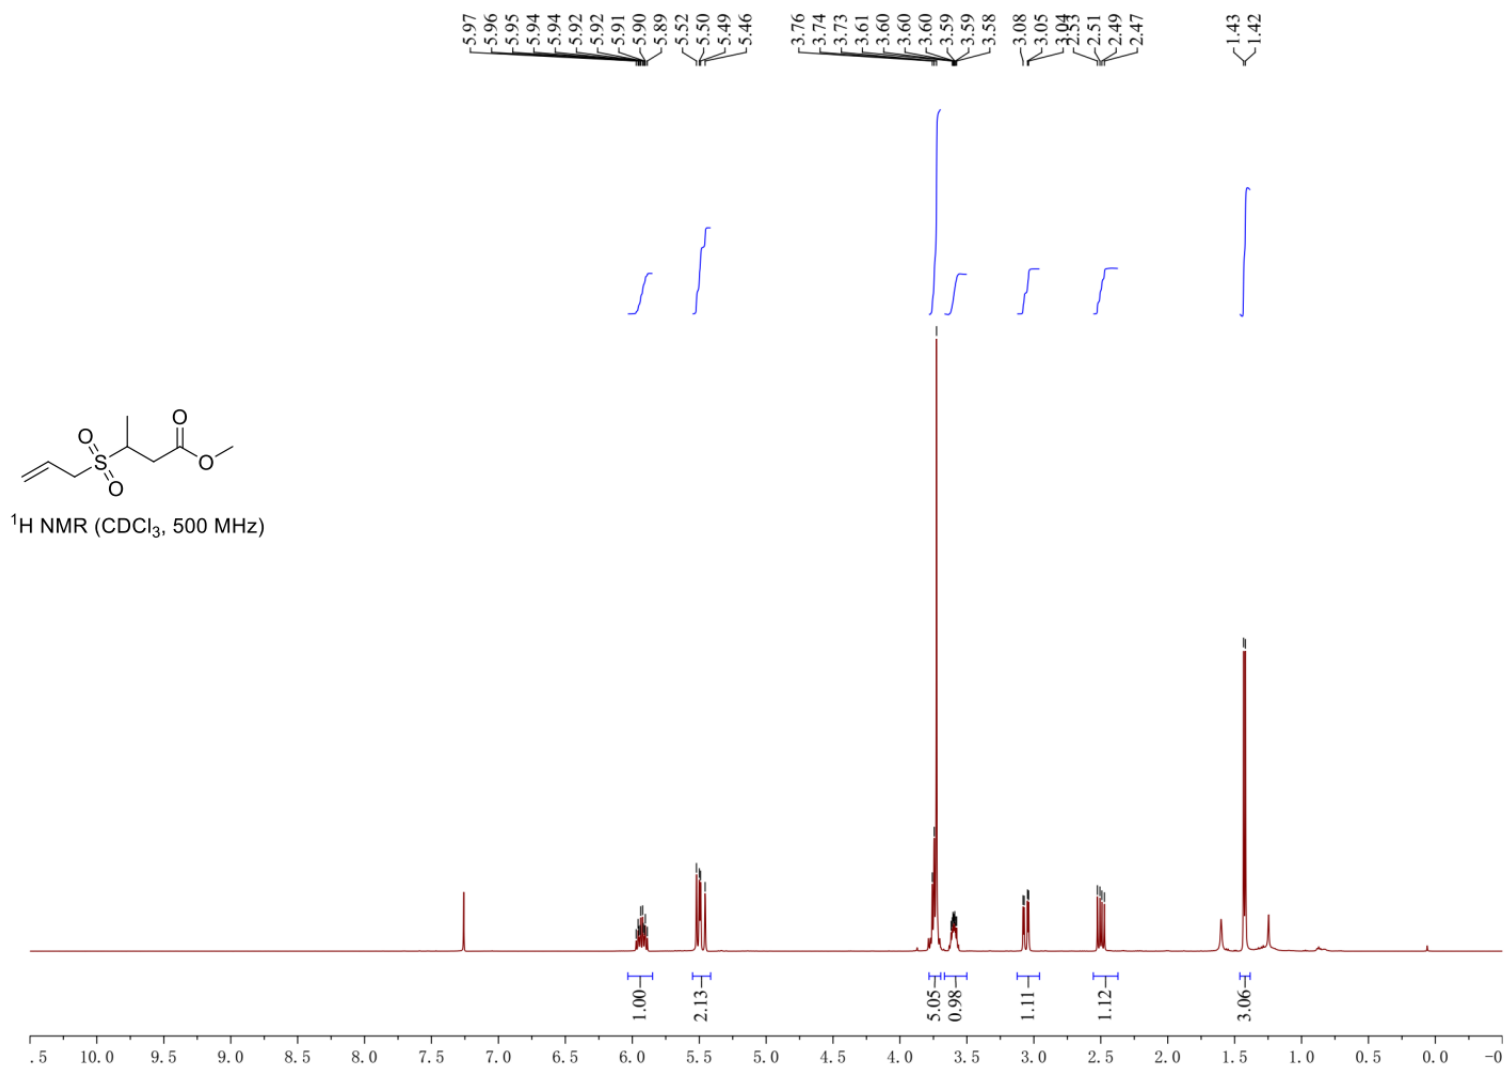

[Go back to table of contents](#)

### Methyl 3-(allylsulfonyl)butanoate (15b)

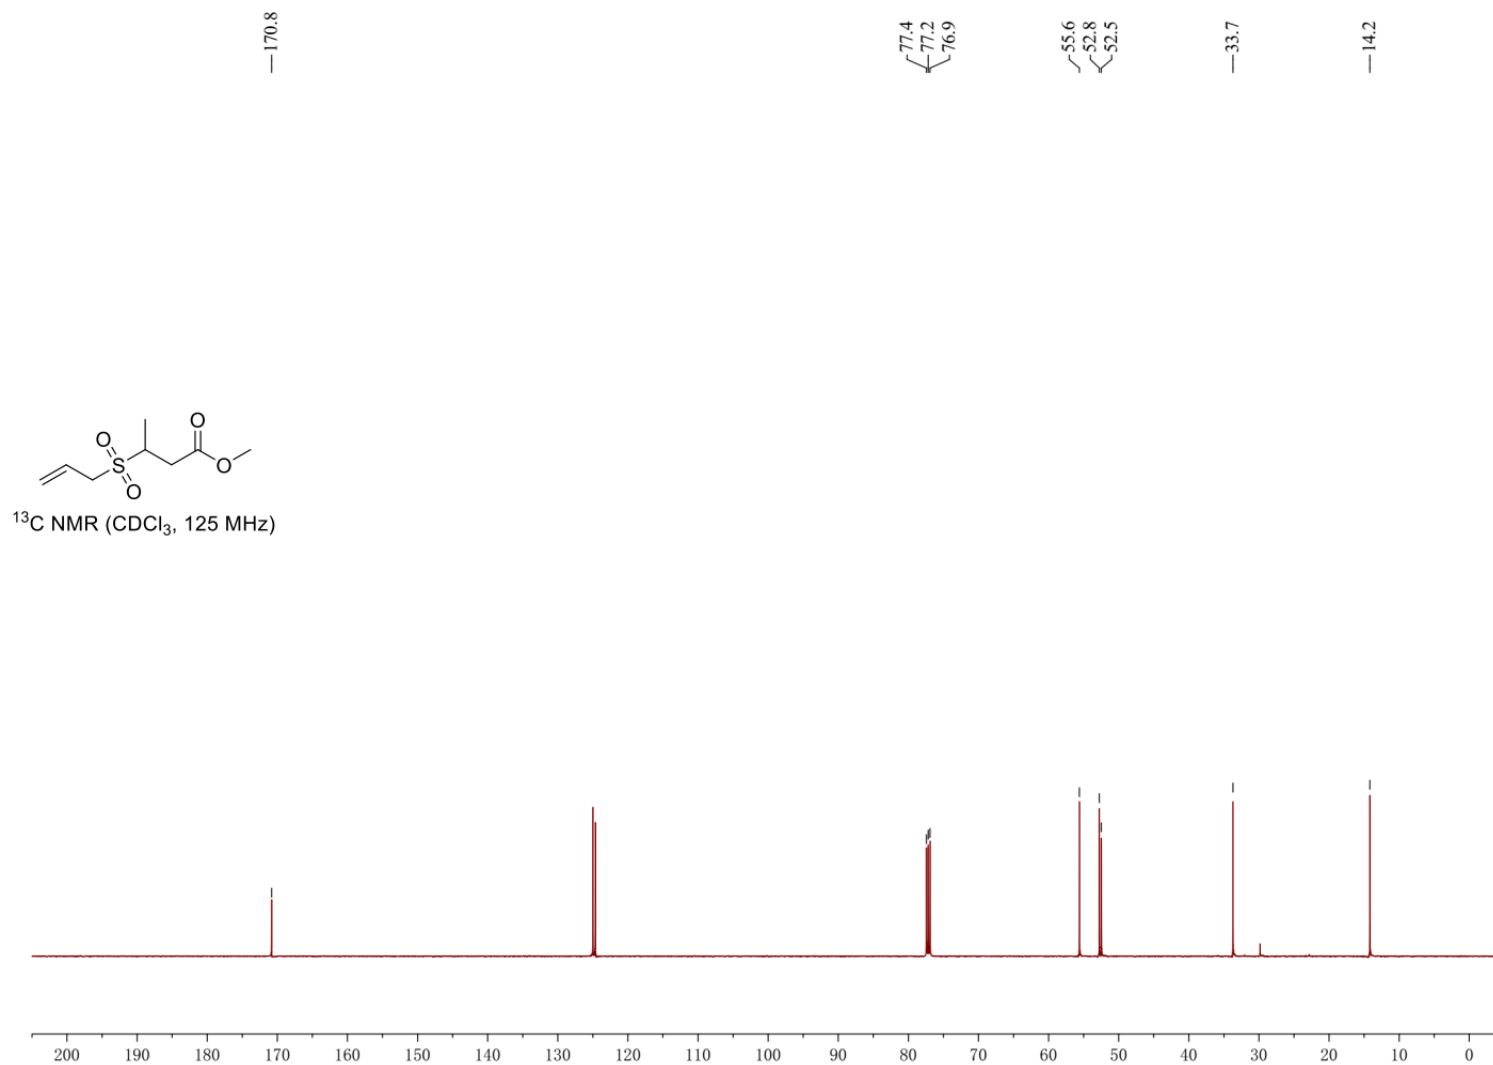

[Go back to table of contents](#)



*trans*-Dimethyl-4-(allylsulfonyl)cyclopentane-1,2-dicarboxylate (16a)

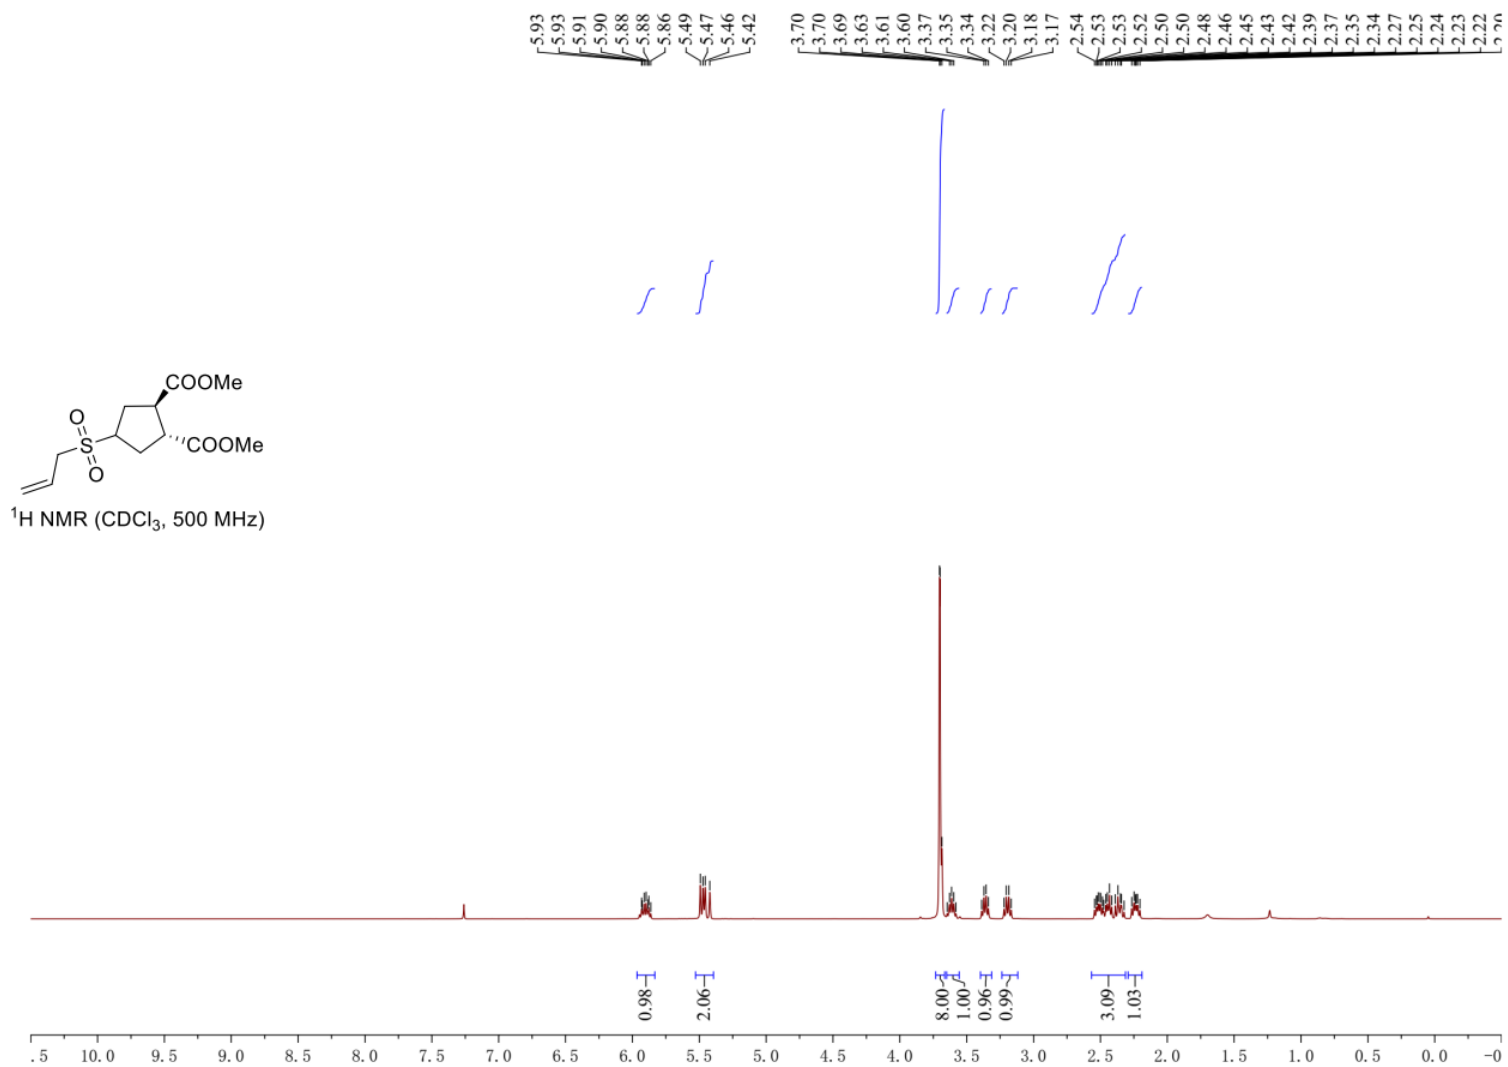

*trans*-Dimethyl-4-(allylsulfonyl)cyclopentane-1,2-dicarboxylate (16a)

173.80  
172.59

124.82

58.08  
56.88  
52.51  
52.49  
47.00  
45.89

29.97  
29.73

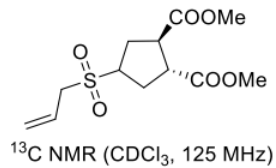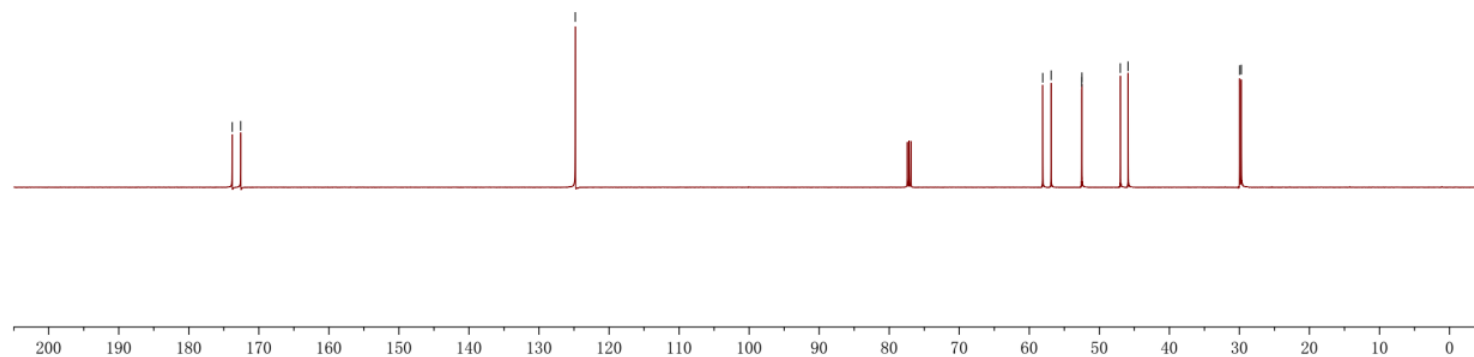

*trans, trans*-Dimethyl-3-(allylsulfonyl)cyclopentane-1,2-dicarboxylate (16b)

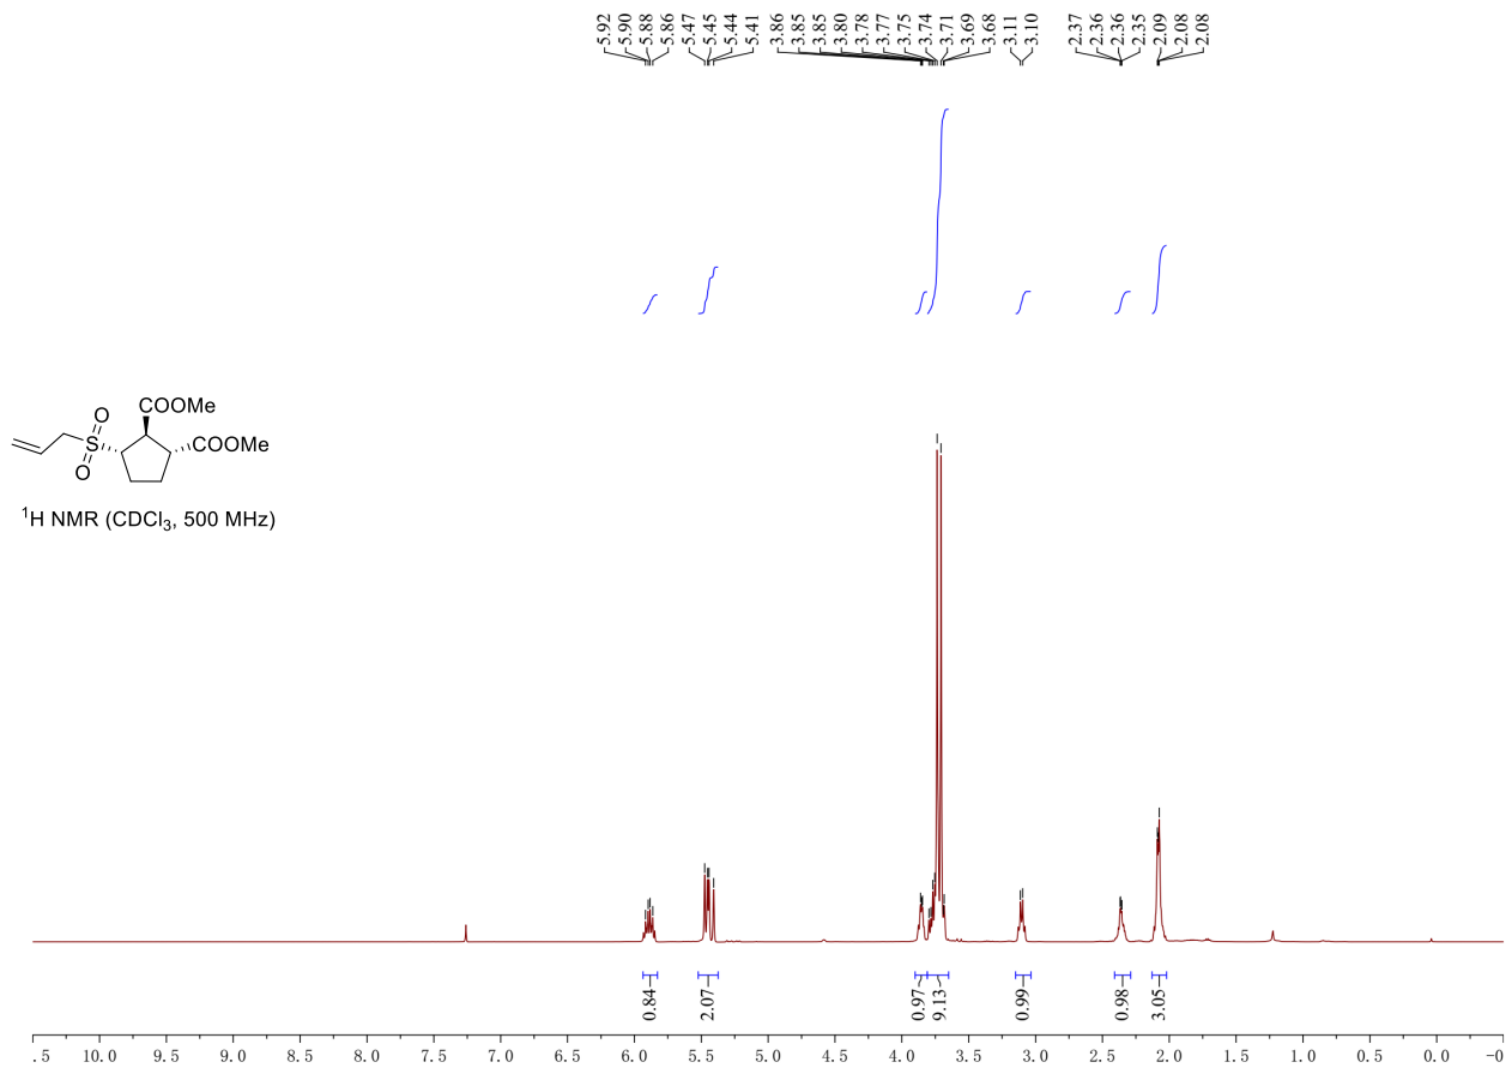

[Go back to table of contents](#)

*trans, trans*-Dimethyl-3-(allylsulfonyl)cyclopentane-1,2-dicarboxylate (16b)

172.81  
172.63

124.89  
124.55

62.30  
56.82  
52.94  
52.47  
49.04  
47.81

29.81  
26.67

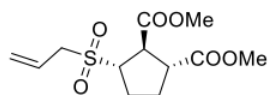

$^{13}\text{C}$  NMR ( $\text{CDCl}_3$ , 125 MHz)

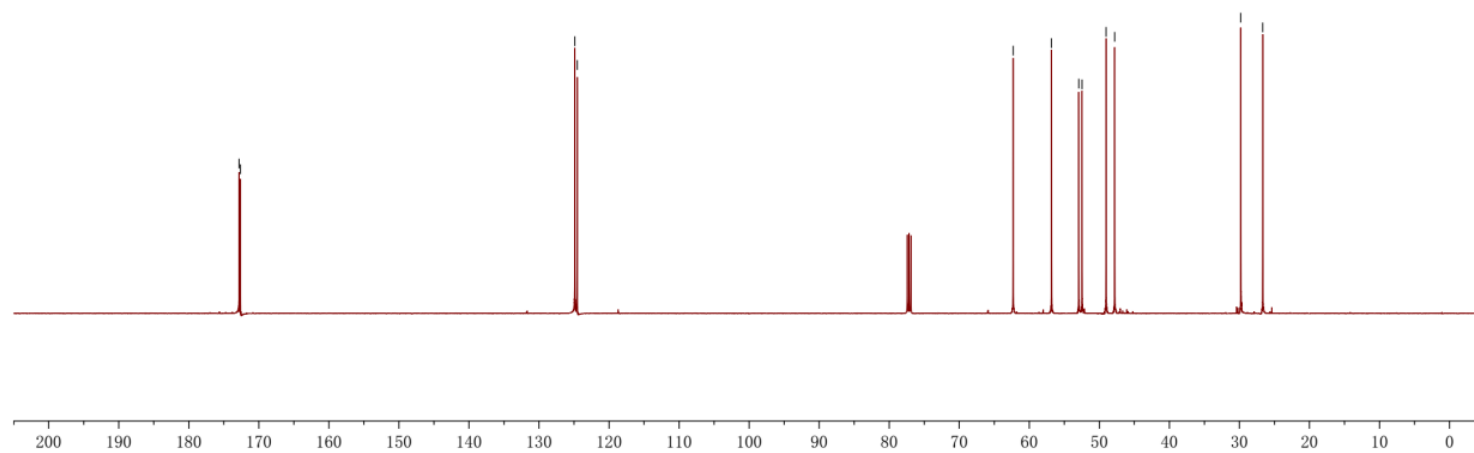

[Go back to table of contents](#)

**2-Methyl-1-(methylsulfonyl)propyl acetate (17a)**

**2-Methyl-2-(methylsulfonyl)propyl acetate (17b)**

**2-Methyl-3-(methylsulfonyl)propyl acetate (17c)**

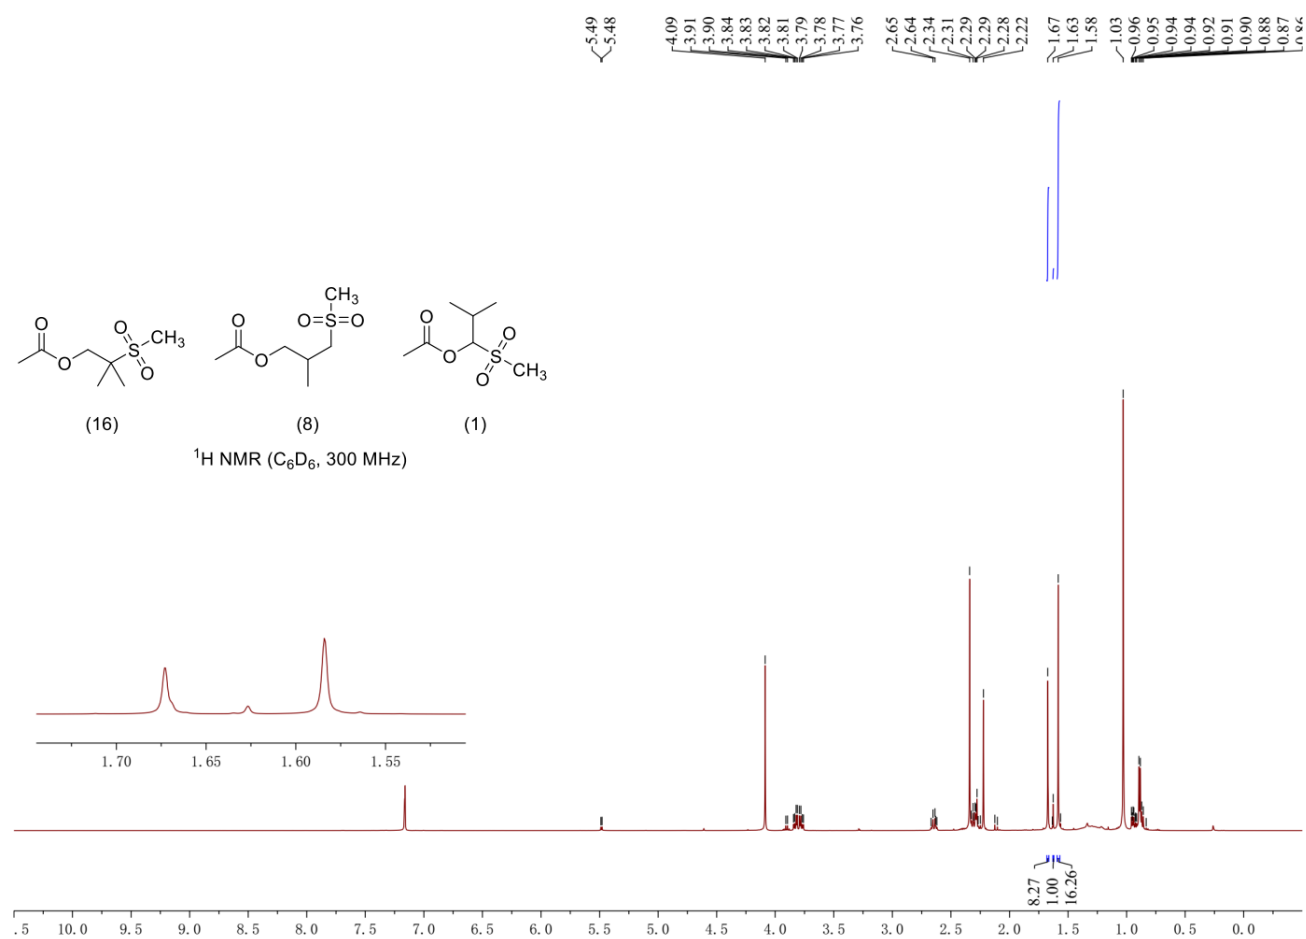

[Go back to table of contents](#)

**2-Methyl-1-(methylsulfonyl)propyl acetate (17a)**

**2-Methyl-2-(methylsulfonyl)propyl acetate (17b)**

**2-Methyl-3-(methylsulfonyl)propyl acetate (17c)**

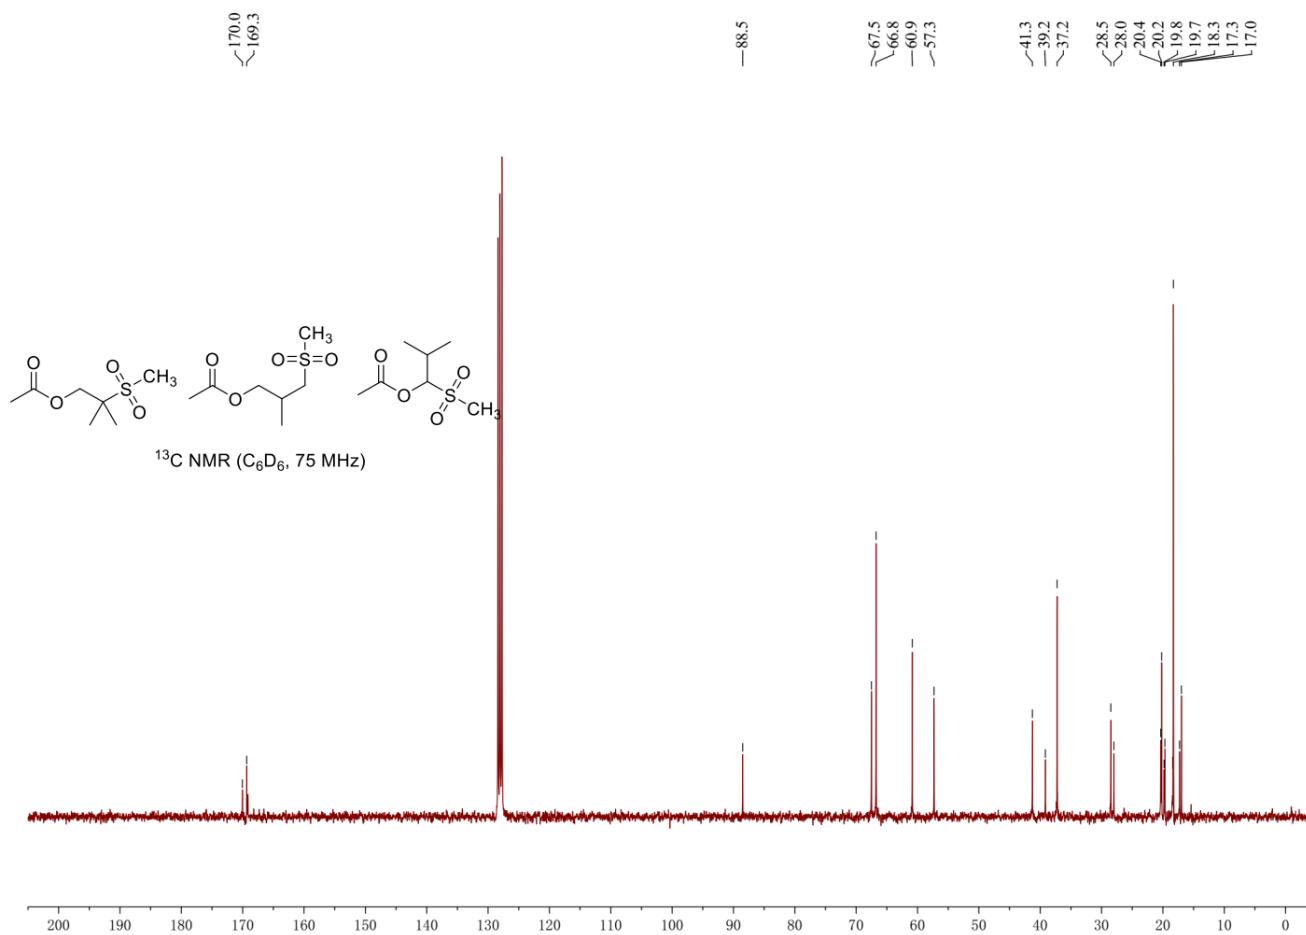

### 5-(Allylsulfonyl)-4-methylpentanenitrile (18a)

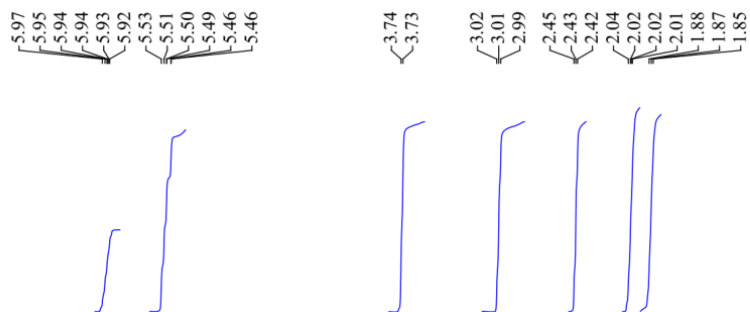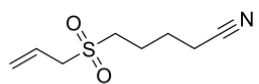

$^1\text{H}$  NMR ( $\text{CDCl}_3$ , 500 MHz)

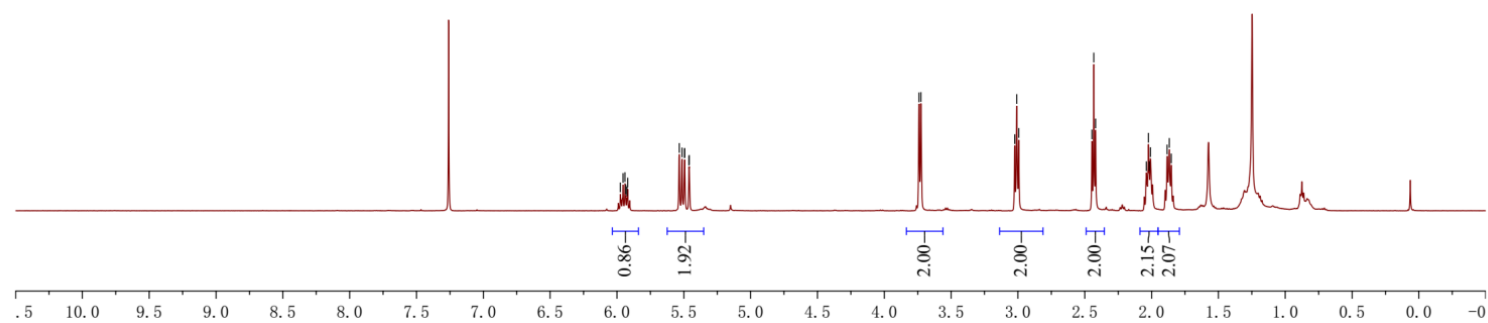

[Go back to table of contents](#)

### 5-(Allylsulfonyl)-4-methylpentanenitrile (18a)

125.12  
125.07  
118.91

58.25  
50.02

29.85  
24.34  
21.09  
17.08

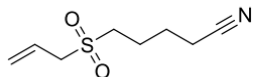

<sup>13</sup>C NMR (CDCl<sub>3</sub>, 125 MHz)

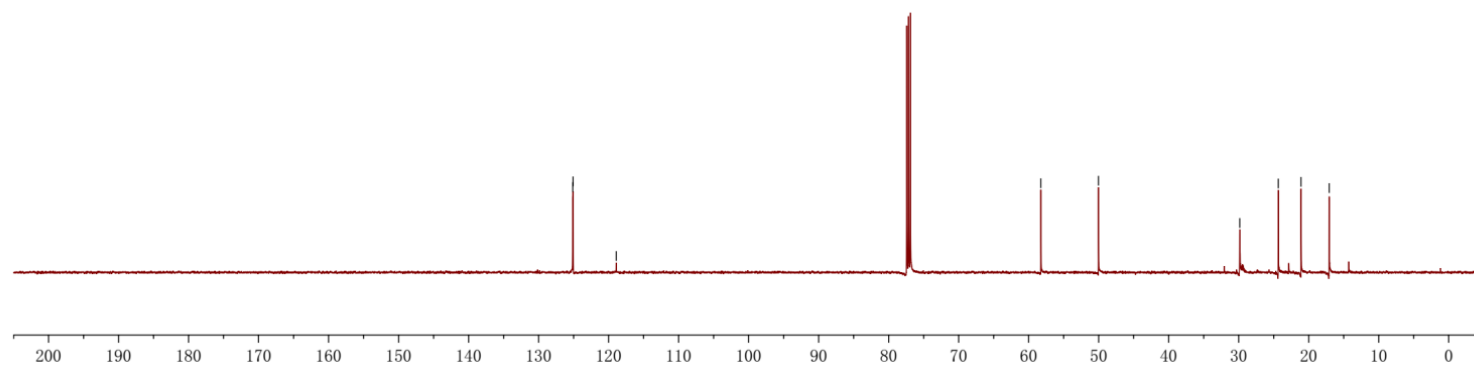

[Go back to table of contents](#)



### 4-(Allylsulfonyl)-4-methylpentanenitrile (18b)

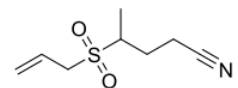

$^1\text{H NMR}$  ( $\text{CDCl}_3$ , 500 MHz)

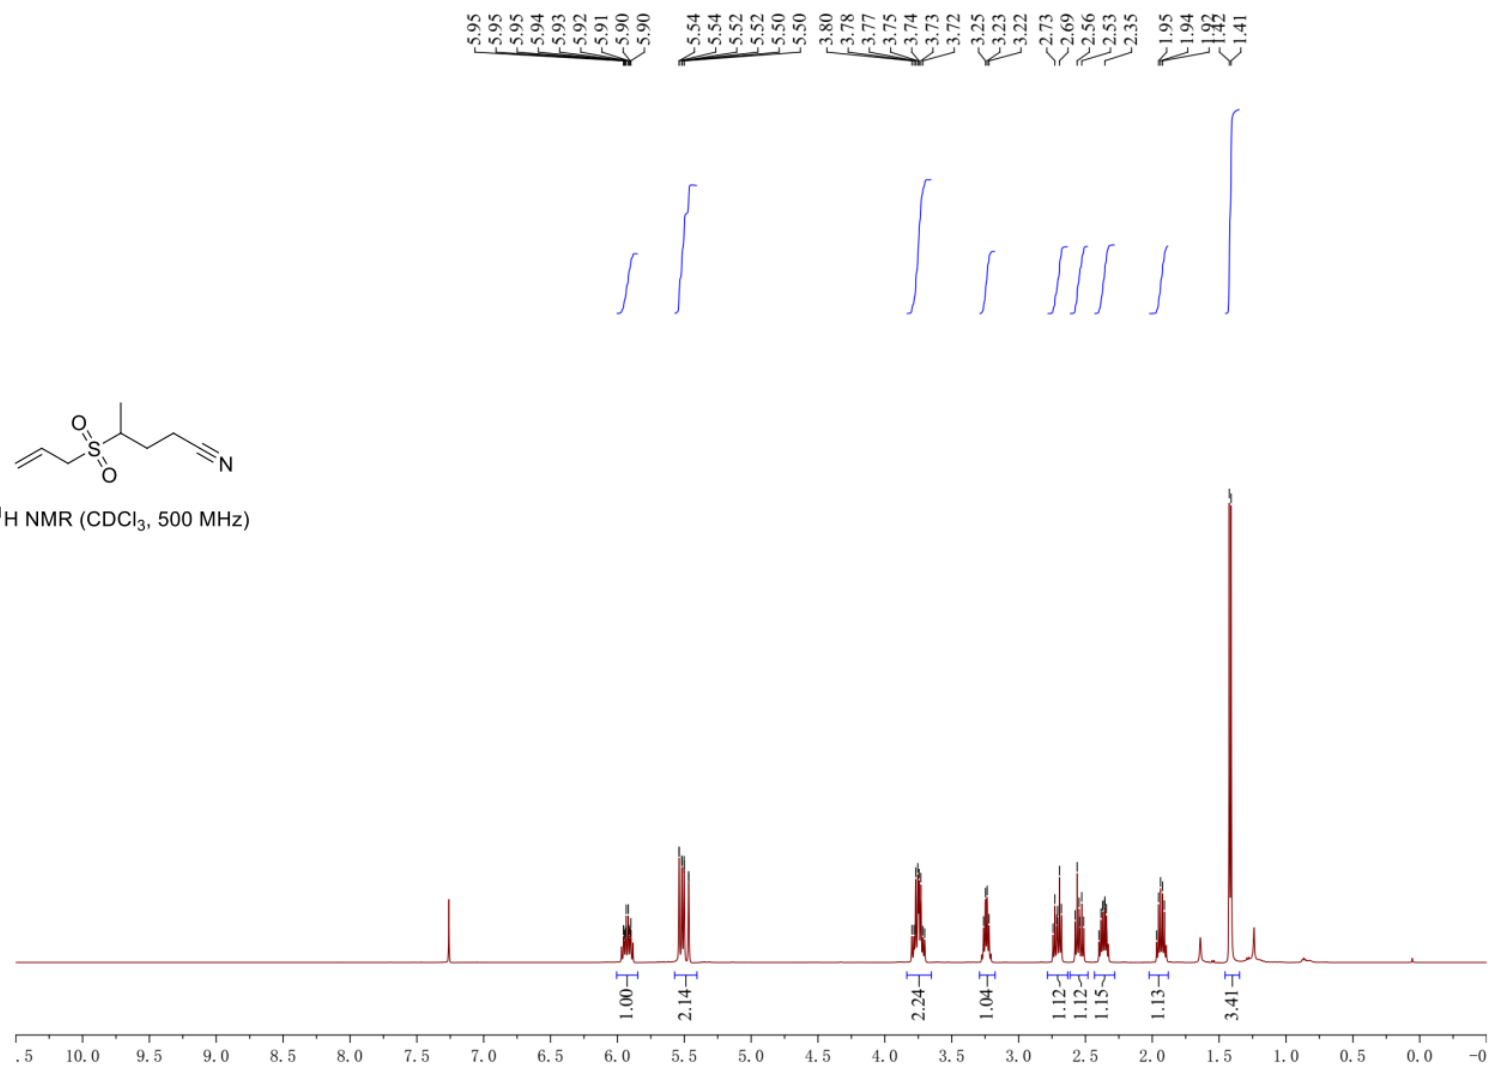

[Go back to table of contents](#)

### 4-(Allylsulfonyl)-4-methylpentanenitrile (18b)

~125.18  
~124.49  
~118.52

~55.69  
~53.96

~25.06  
~15.07  
~13.74

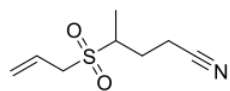

<sup>13</sup>C NMR (CDCl<sub>3</sub>, 125 MHz)

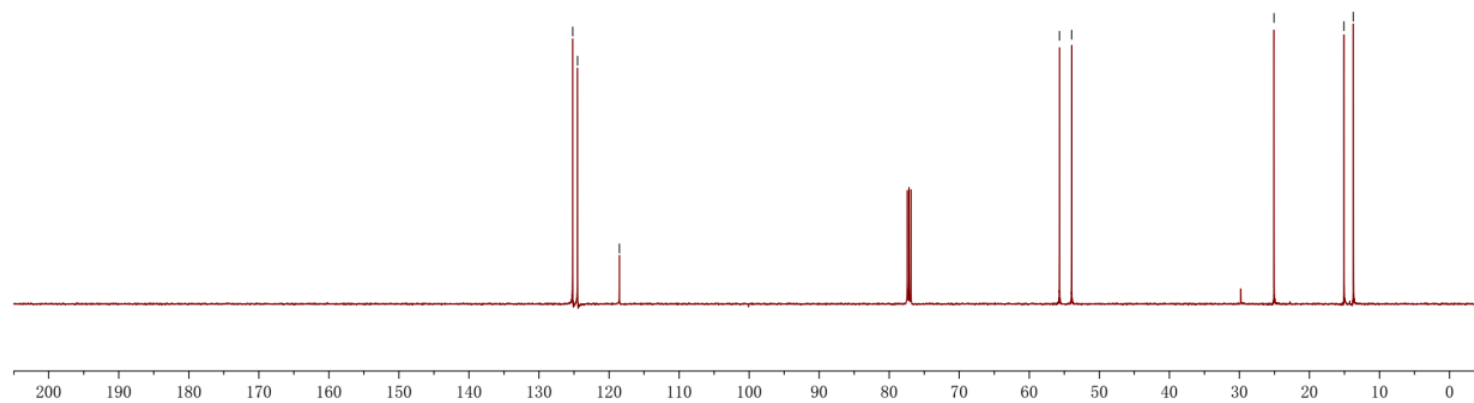

[Go back to table of contents](#)

(1,2-*cis*)-2-(allylsulfonyl)cyclopentane-1-carbonitrile (19a)

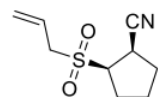

$^1\text{H NMR}$  ( $\text{CDCl}_3$ , 500 MHz)

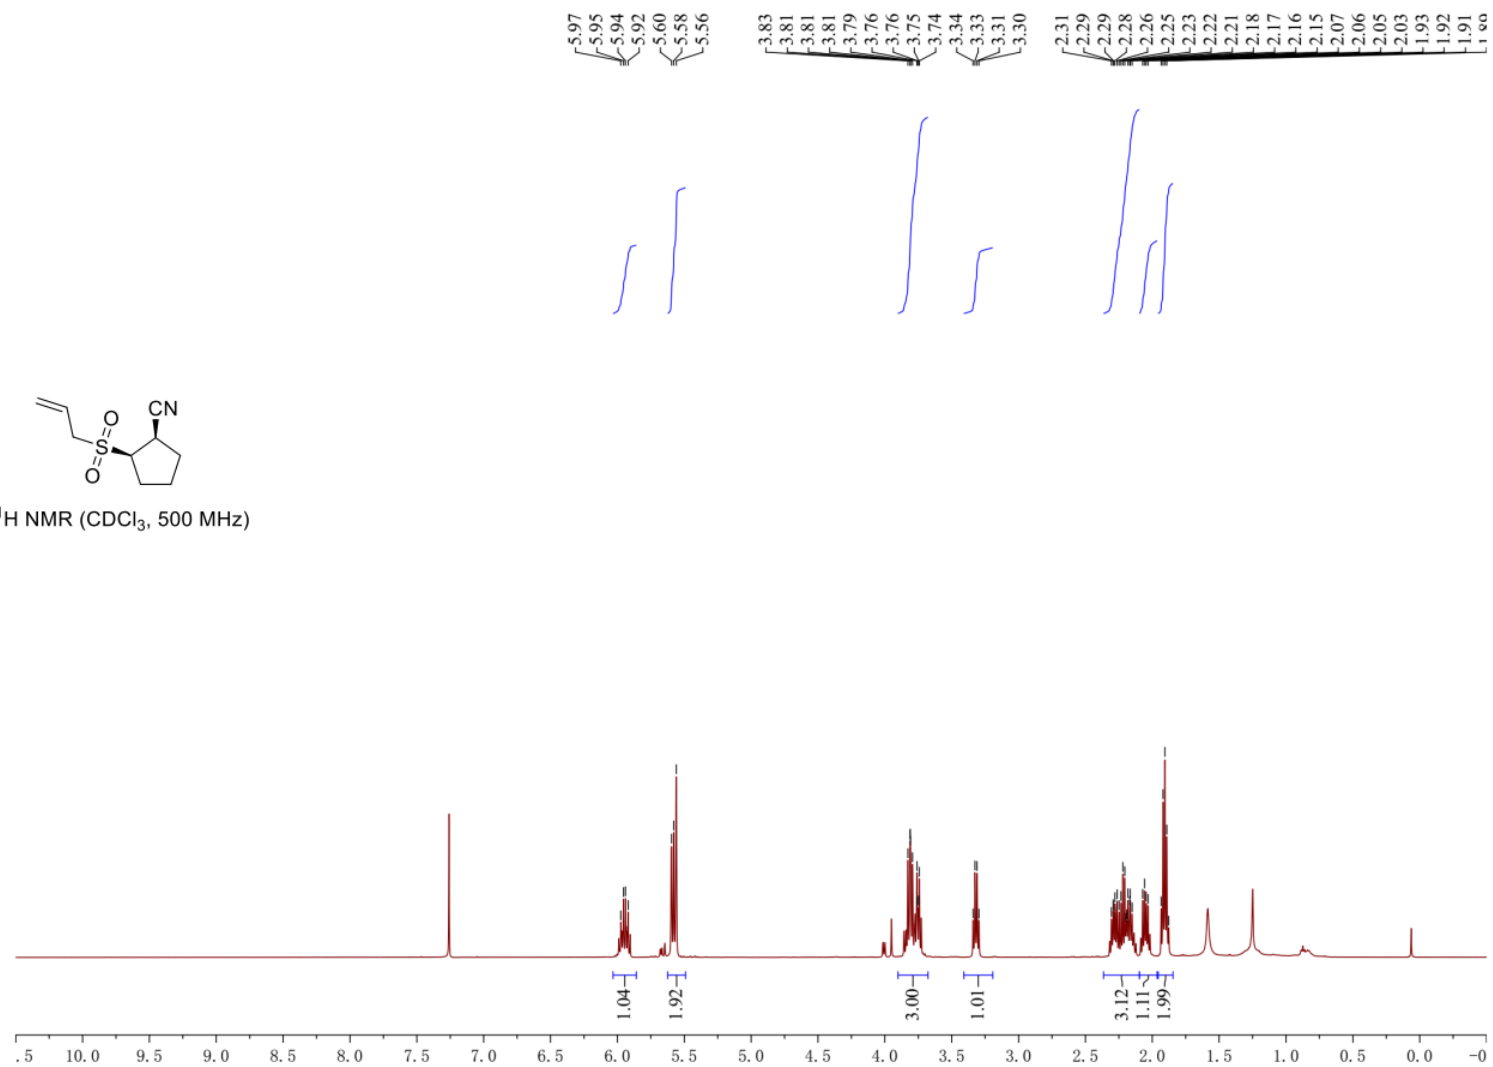

[Go back to table of contents](#)

**(1,2-*cis*)-2-(allylsulfonyl)cyclopentane-1-carbonitrile (19a)**

125.84  
124.31  
120.52

62.66  
57.48

32.49  
30.00  
26.62  
25.43

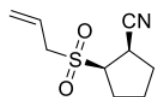

$^{13}\text{C}$  NMR ( $\text{CDCl}_3$ , 125 MHz)

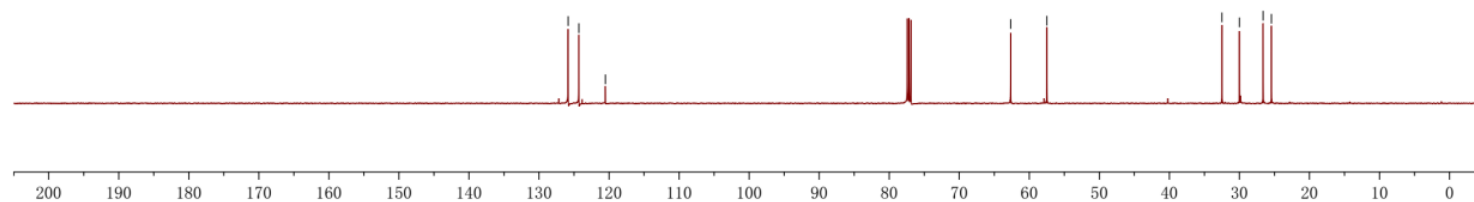

[Go back to table of contents](#)

(1,3-*trans*)-2-(allylsulfonyl)cyclopentane-1-carbonitrile (19b)

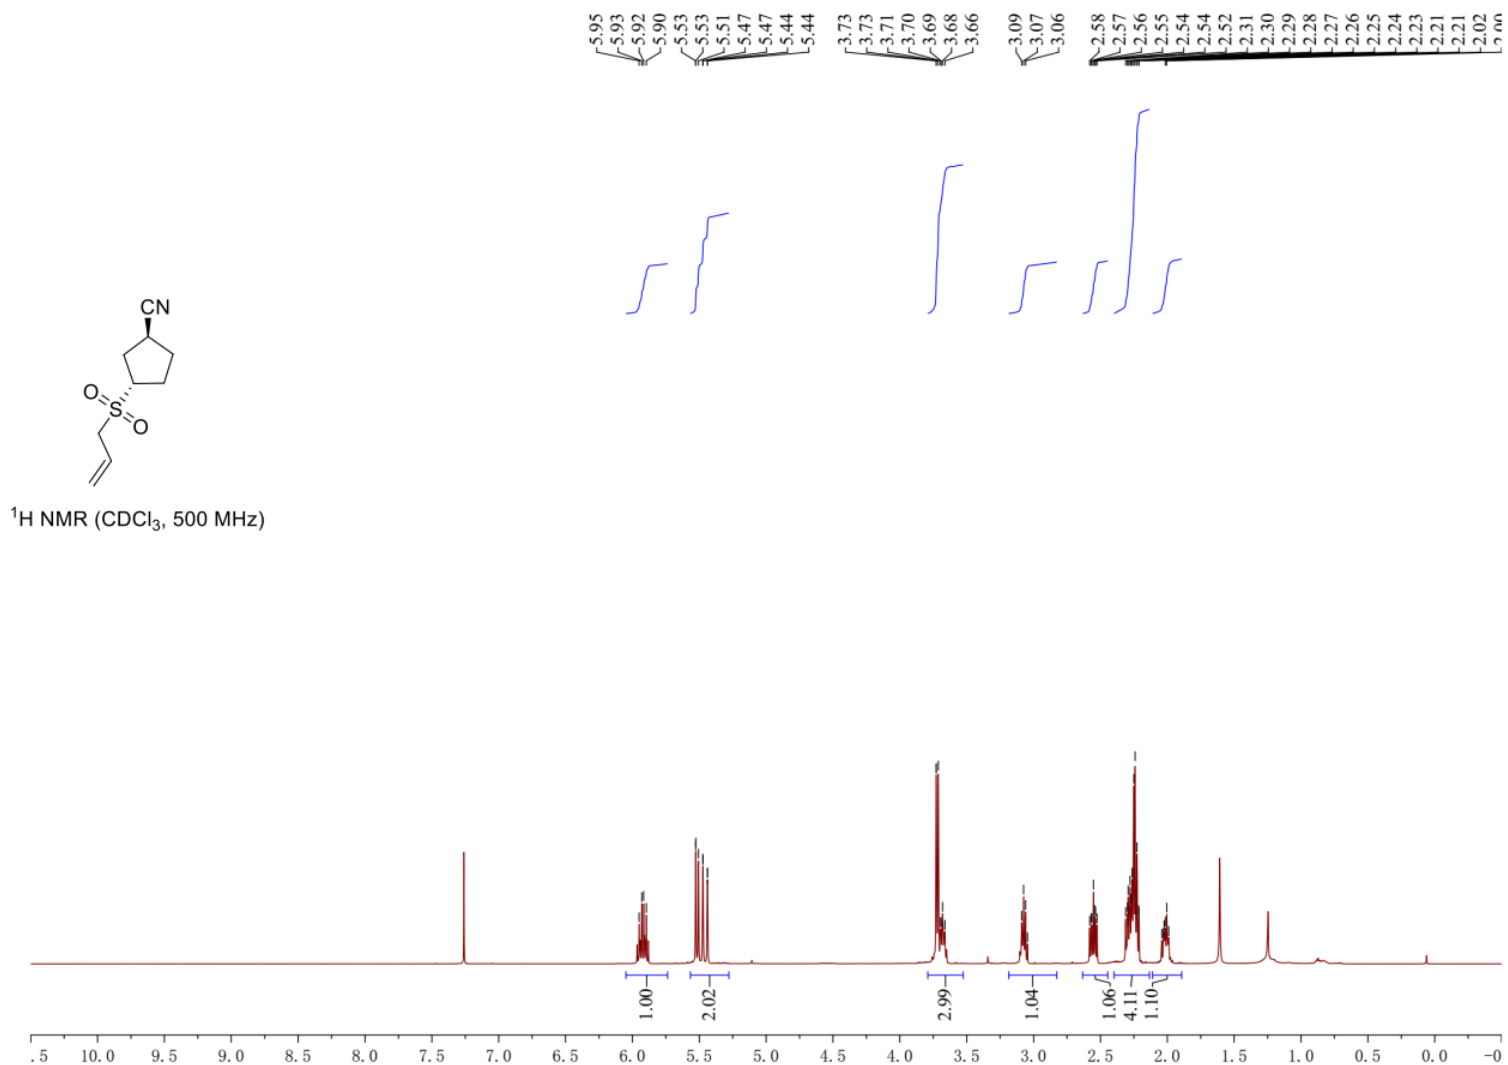

(1,3-*trans*)-2-(allylsulfonyl)cyclopentane-1-carbonitrile (19b)

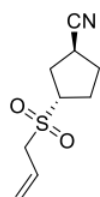

$^{13}\text{C}$  NMR ( $\text{CDCl}_3$ , 125 MHz)

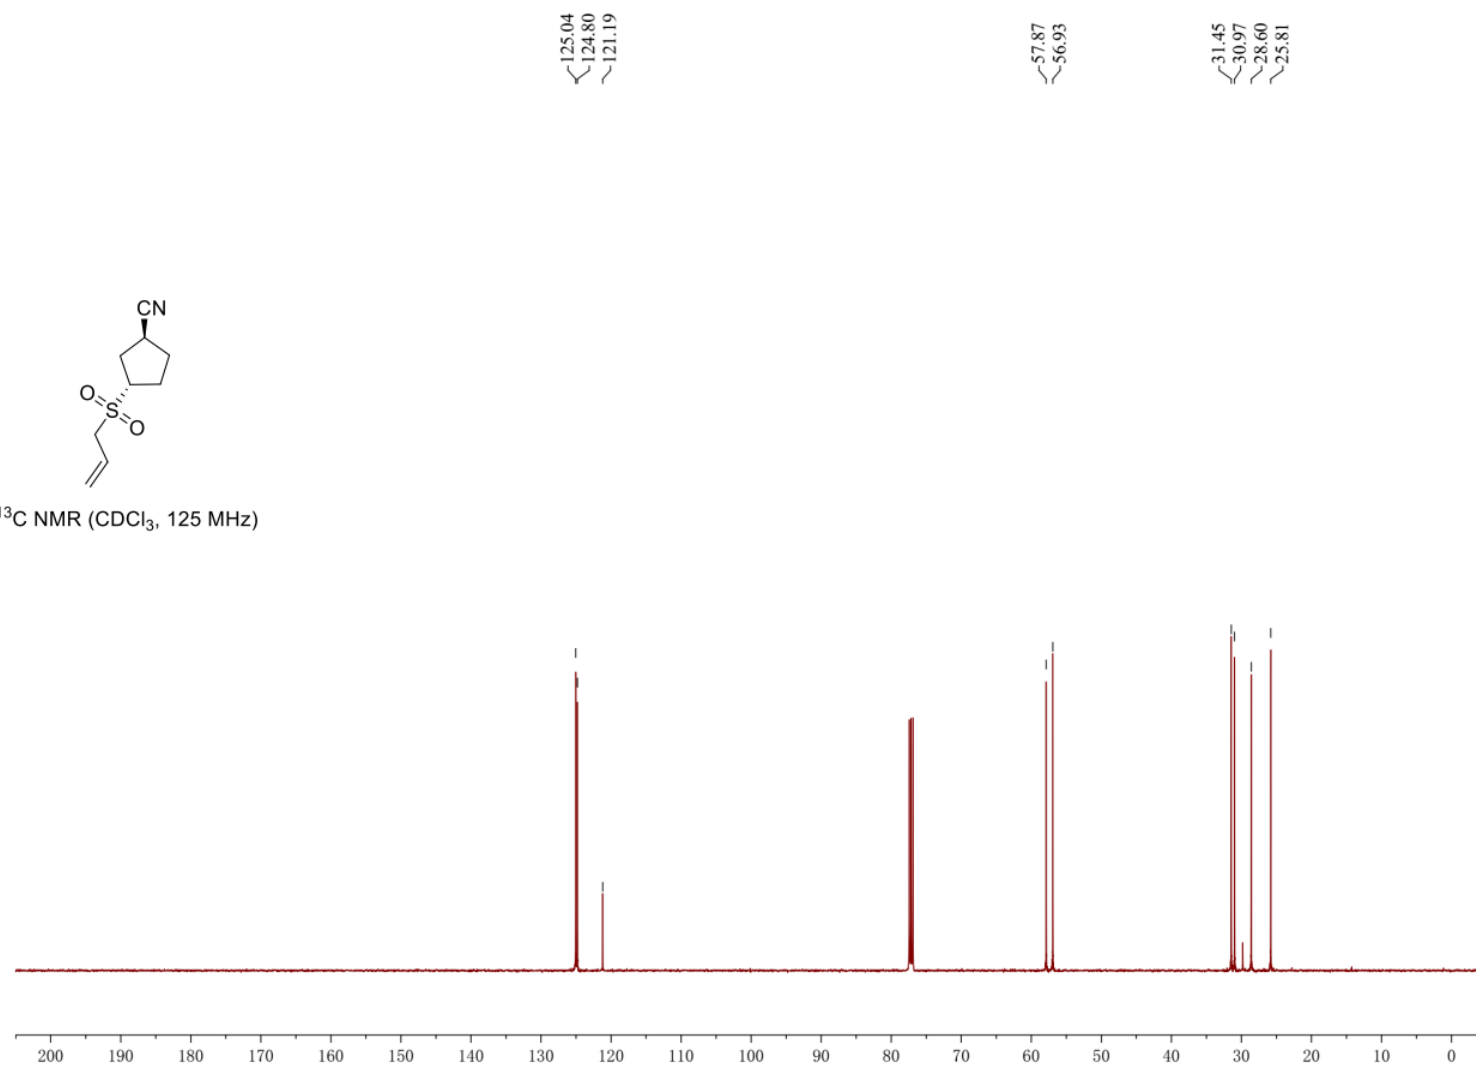

[Go back to table of contents](#)

(1,3-*cis*)-2-(allylsulfonyl)cyclopentane-1-carbonitrile (19c)

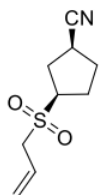

<sup>1</sup>H NMR (CDCl<sub>3</sub>, 500 MHz)

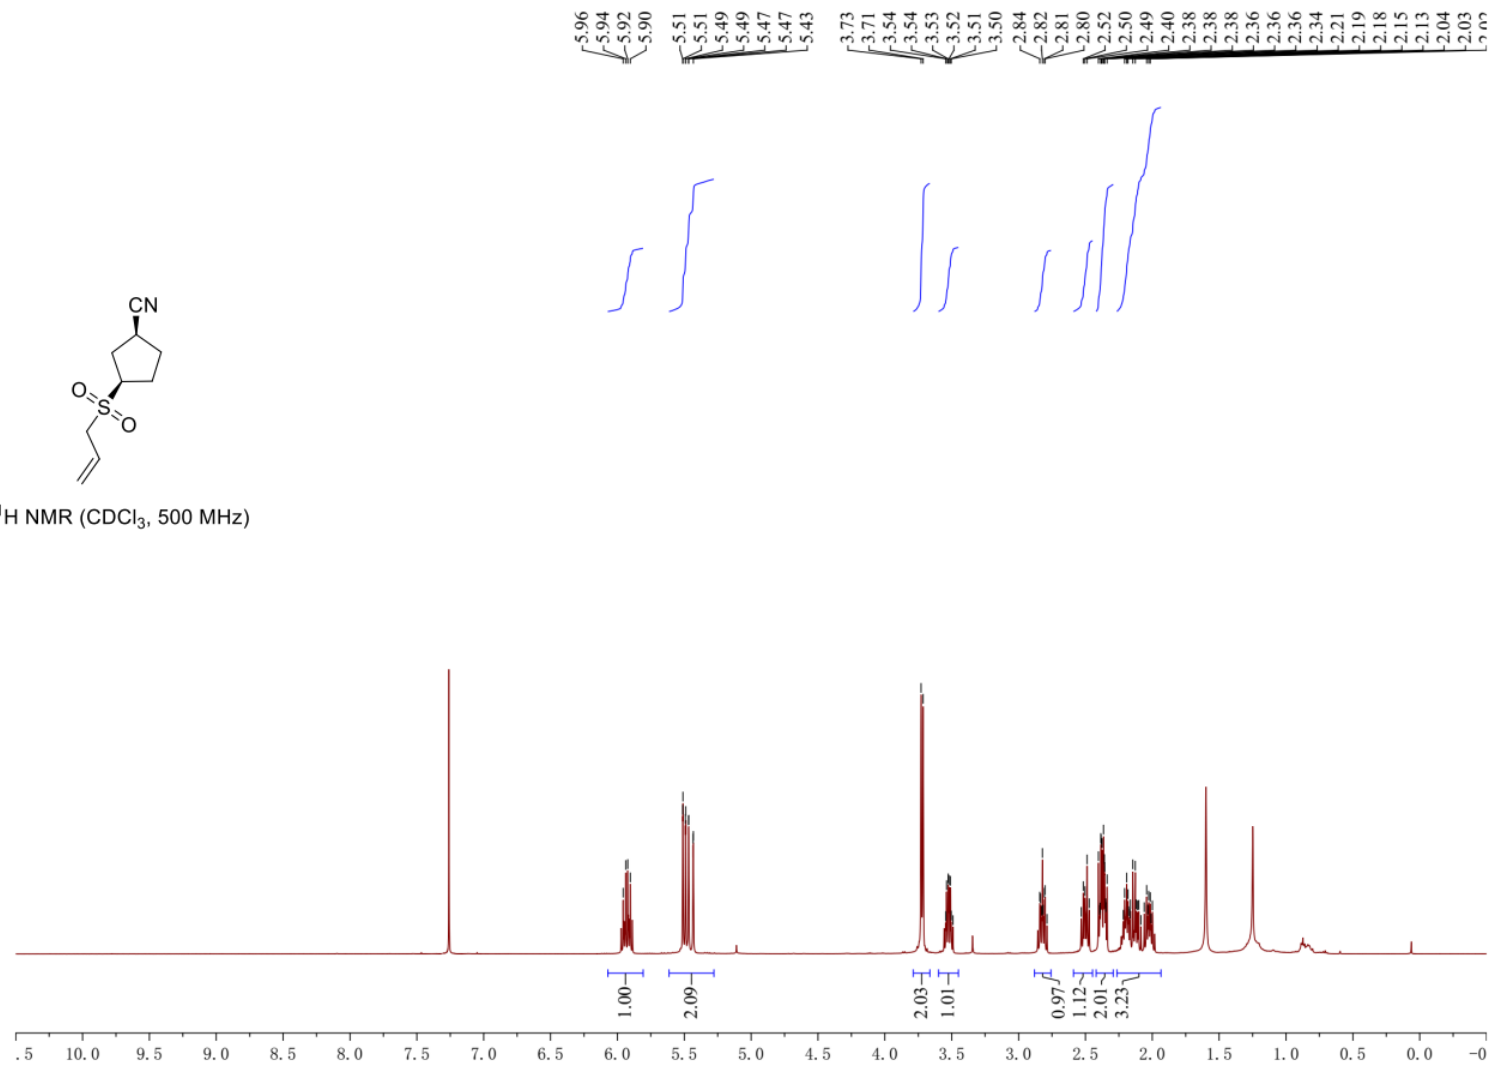

**(1,3-*cis*)-2-(allylsulfonyl)cyclopentane-1-carbonitrile (19c)**

~124.94  
~124.85  
~120.47

~58.29  
~57.02

~31.25  
~30.71  
~28.50  
~25.97

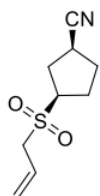

<sup>13</sup>C NMR (CDCl<sub>3</sub>, 125 MHz)

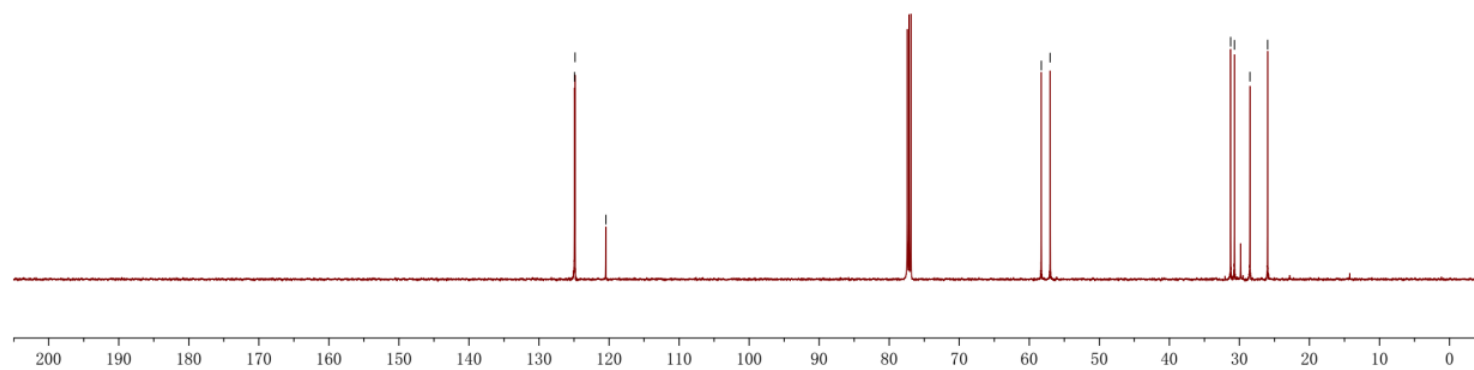

[Go back to table of contents](#)



### 1-(1-(Allylsulfonyl)ethyl)-4-fluorobenzene (20)

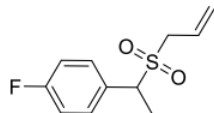

$^1\text{H NMR}$  ( $\text{CDCl}_3$ , 500 MHz)

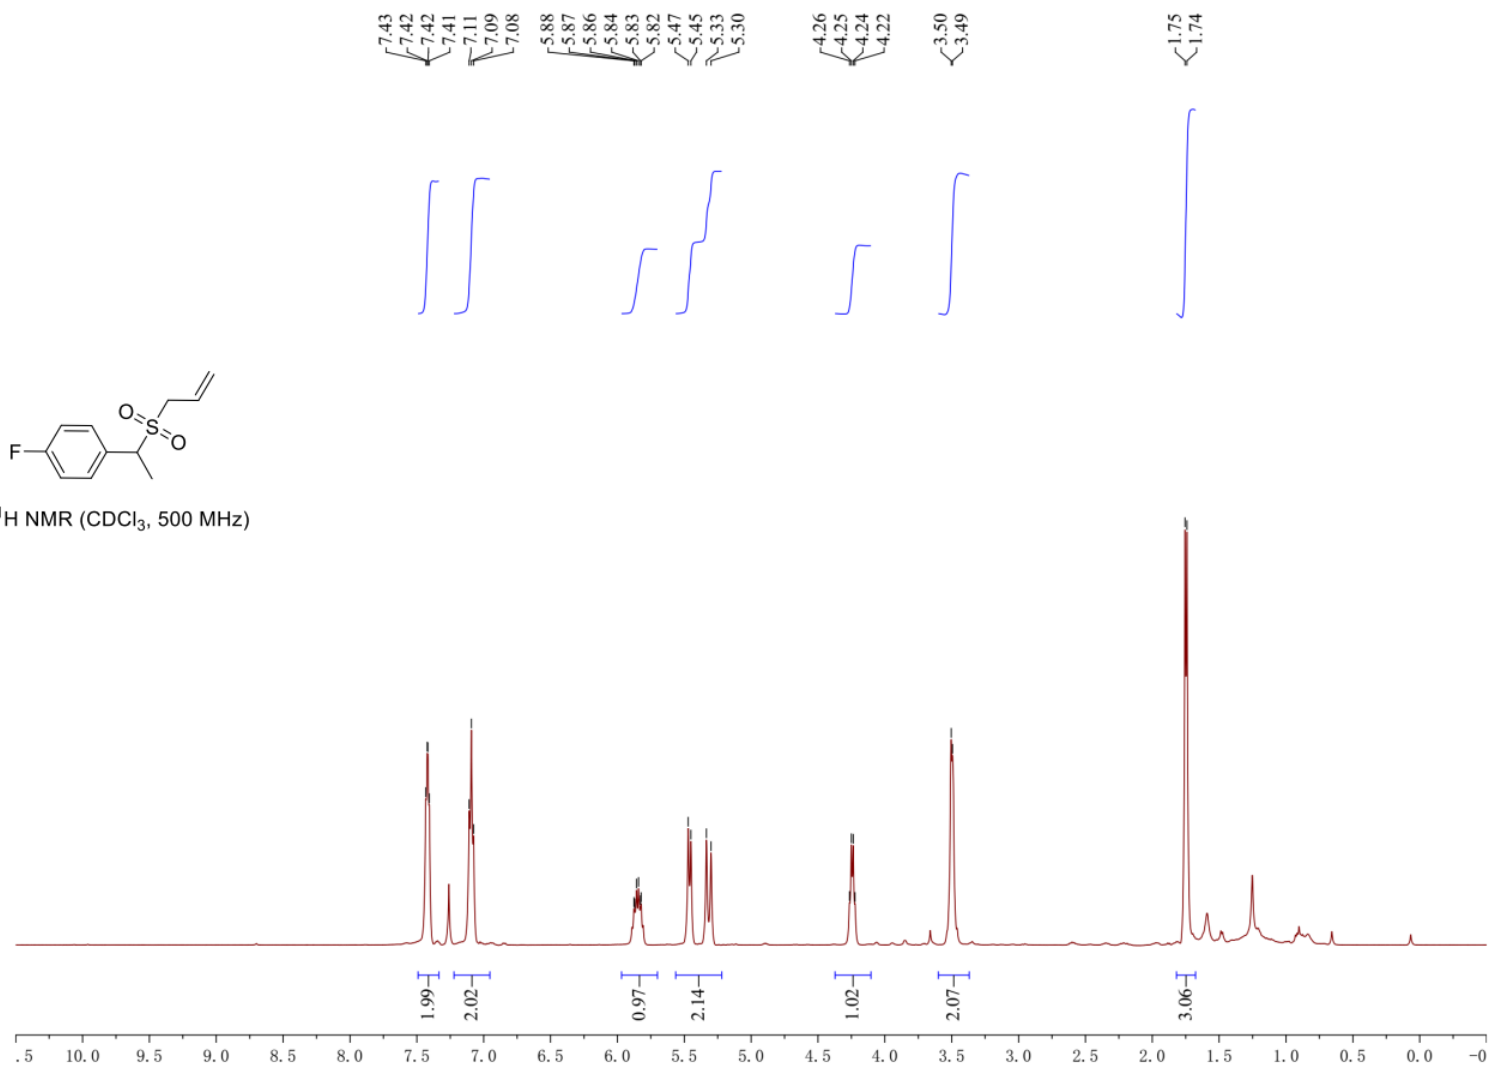

[Go back to table of contents](#)

*trans*-3-Methyl-1,2-oxathiolane 2-oxide (21a)

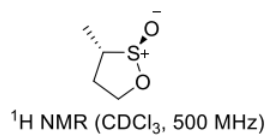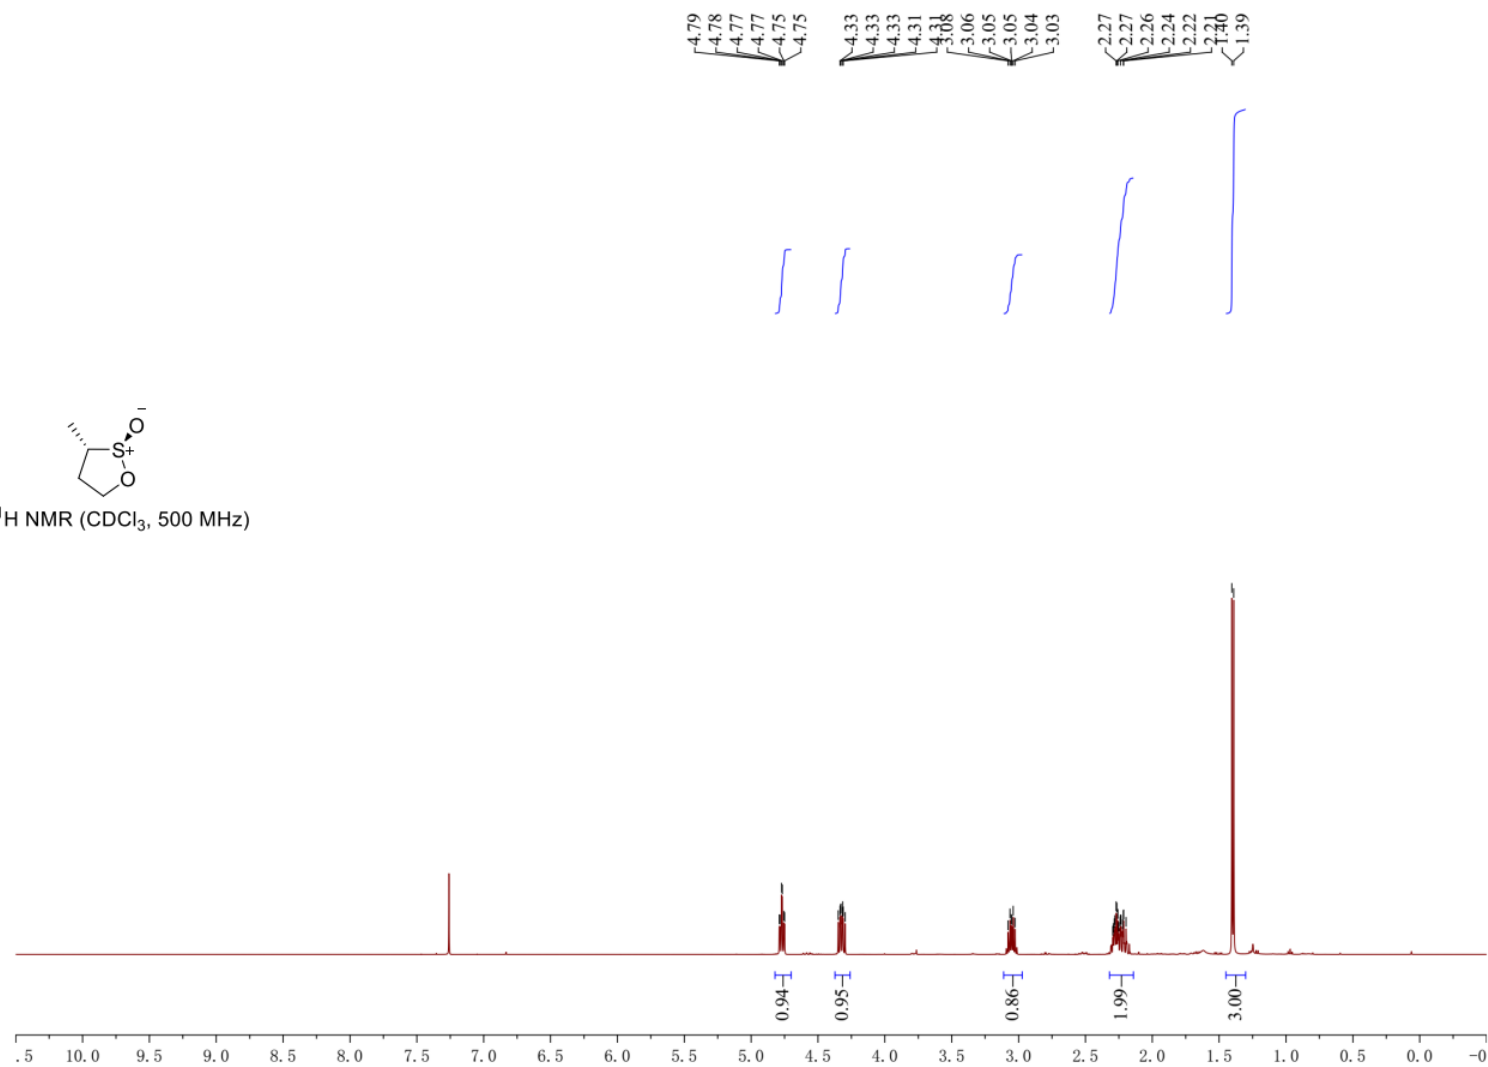

*trans*-3-Methyl-1,2-oxathiolane 2-oxide (21a)

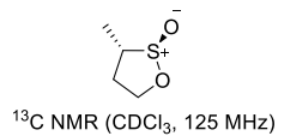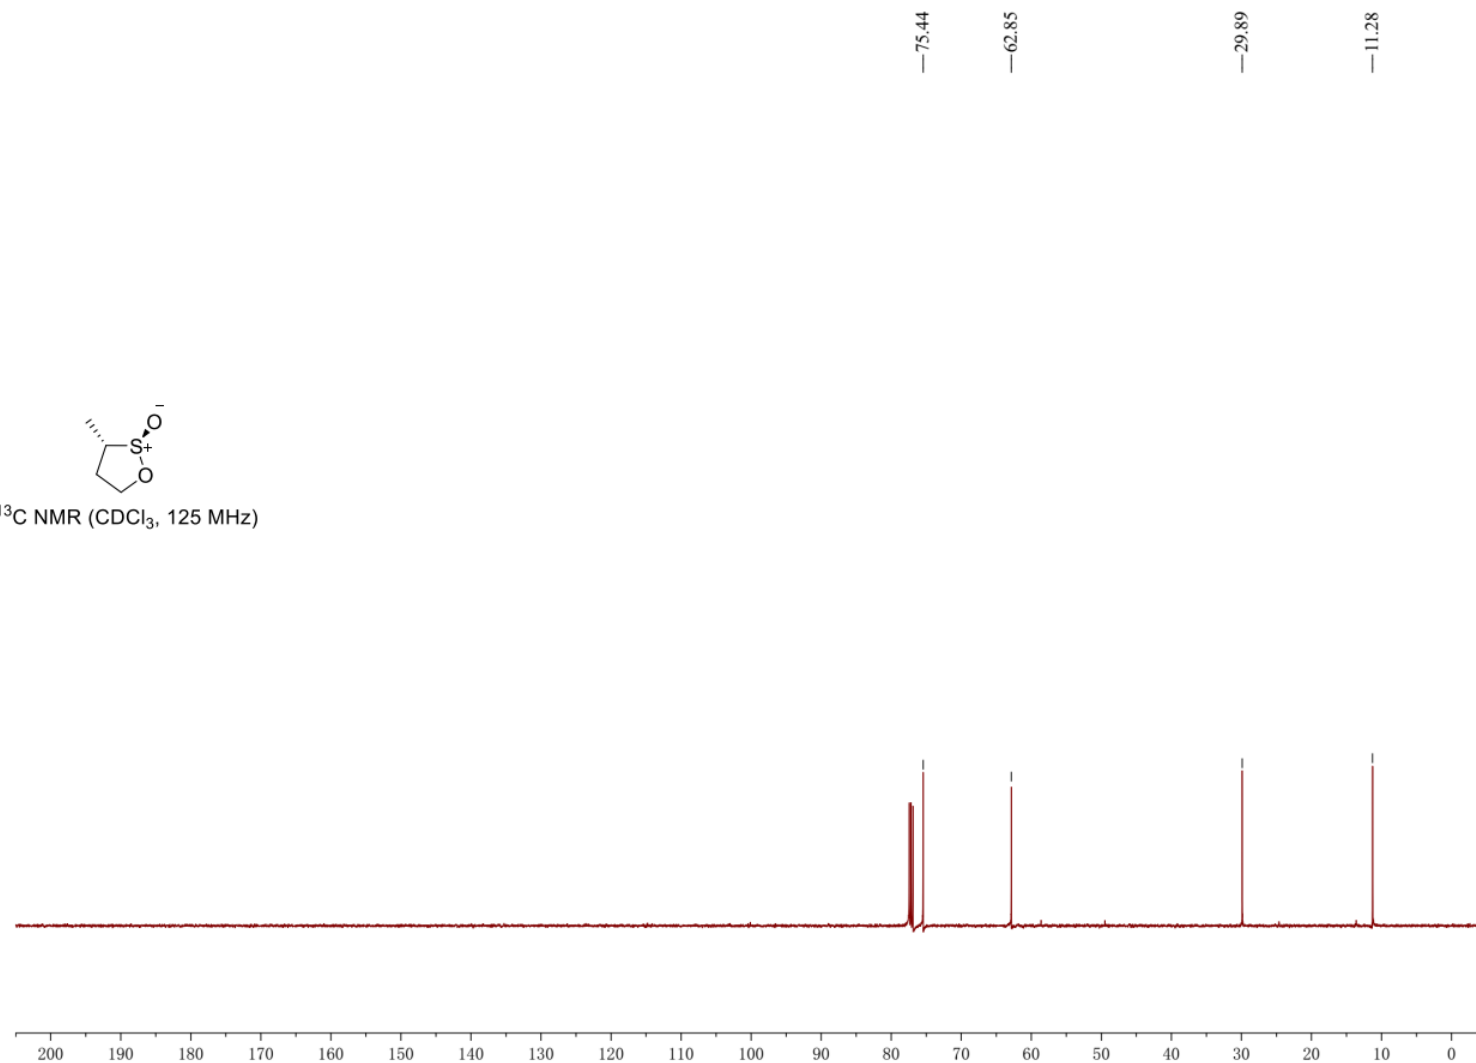

*cis*-3-Methyl-1,2-oxathiolane 2-oxide (21b)

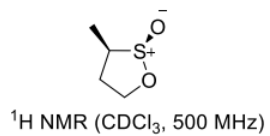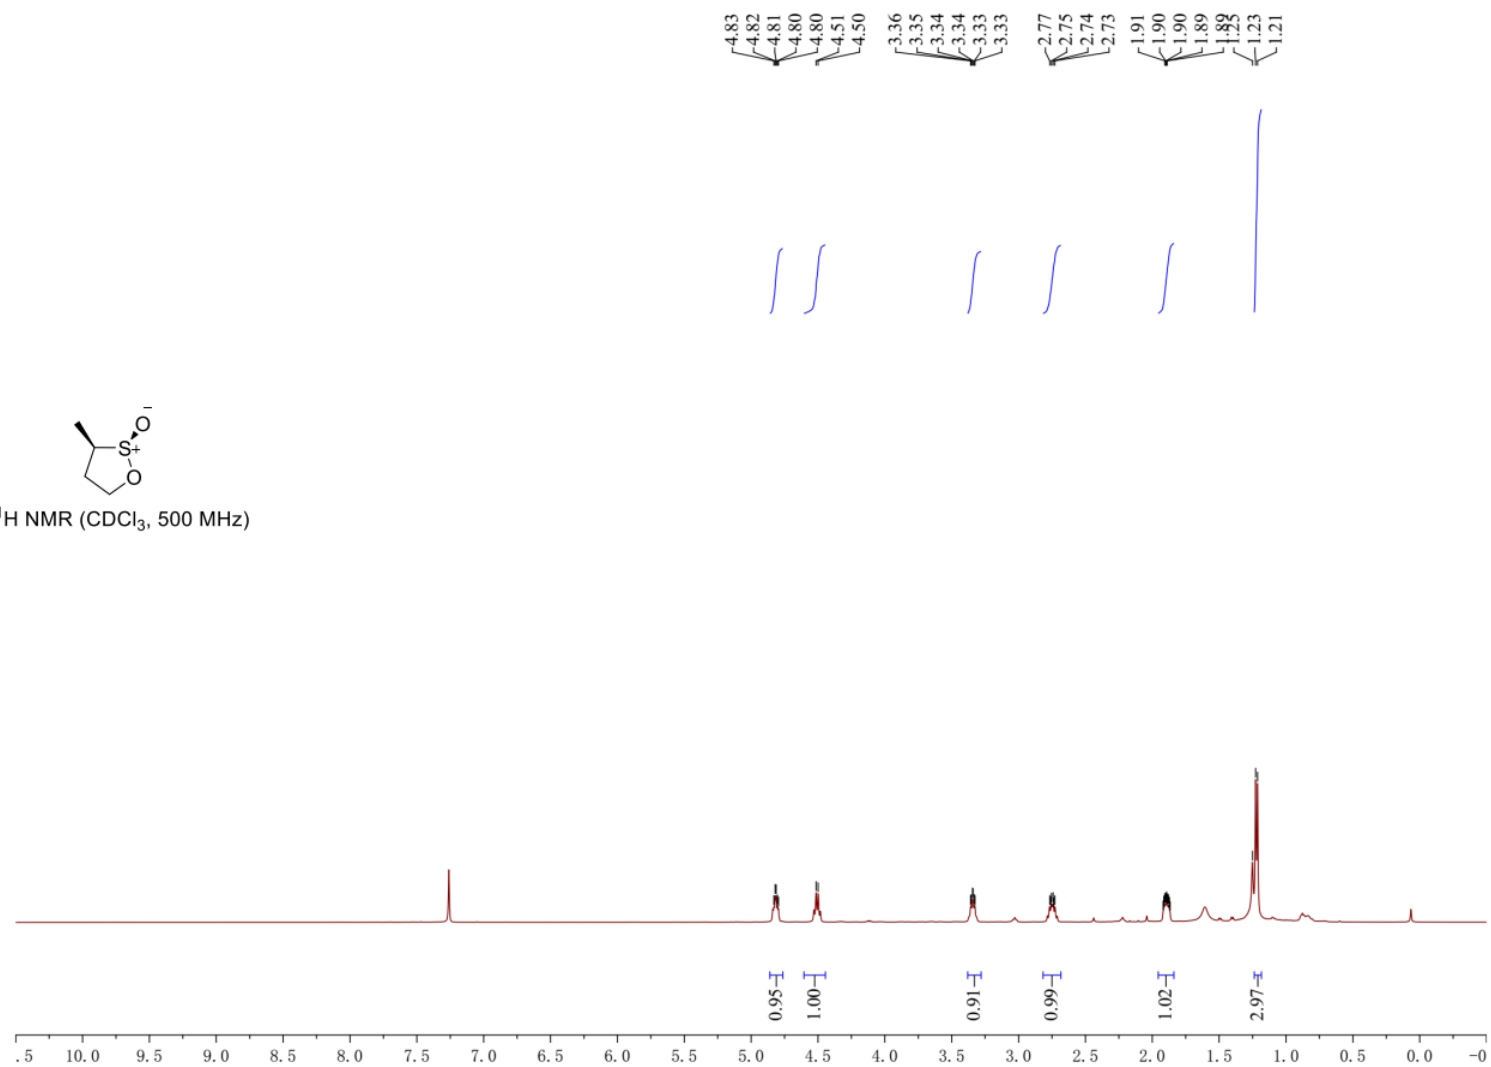

*cis*-3-Methyl-1,2-oxathiolane 2-oxide (21b)

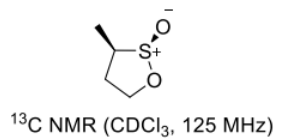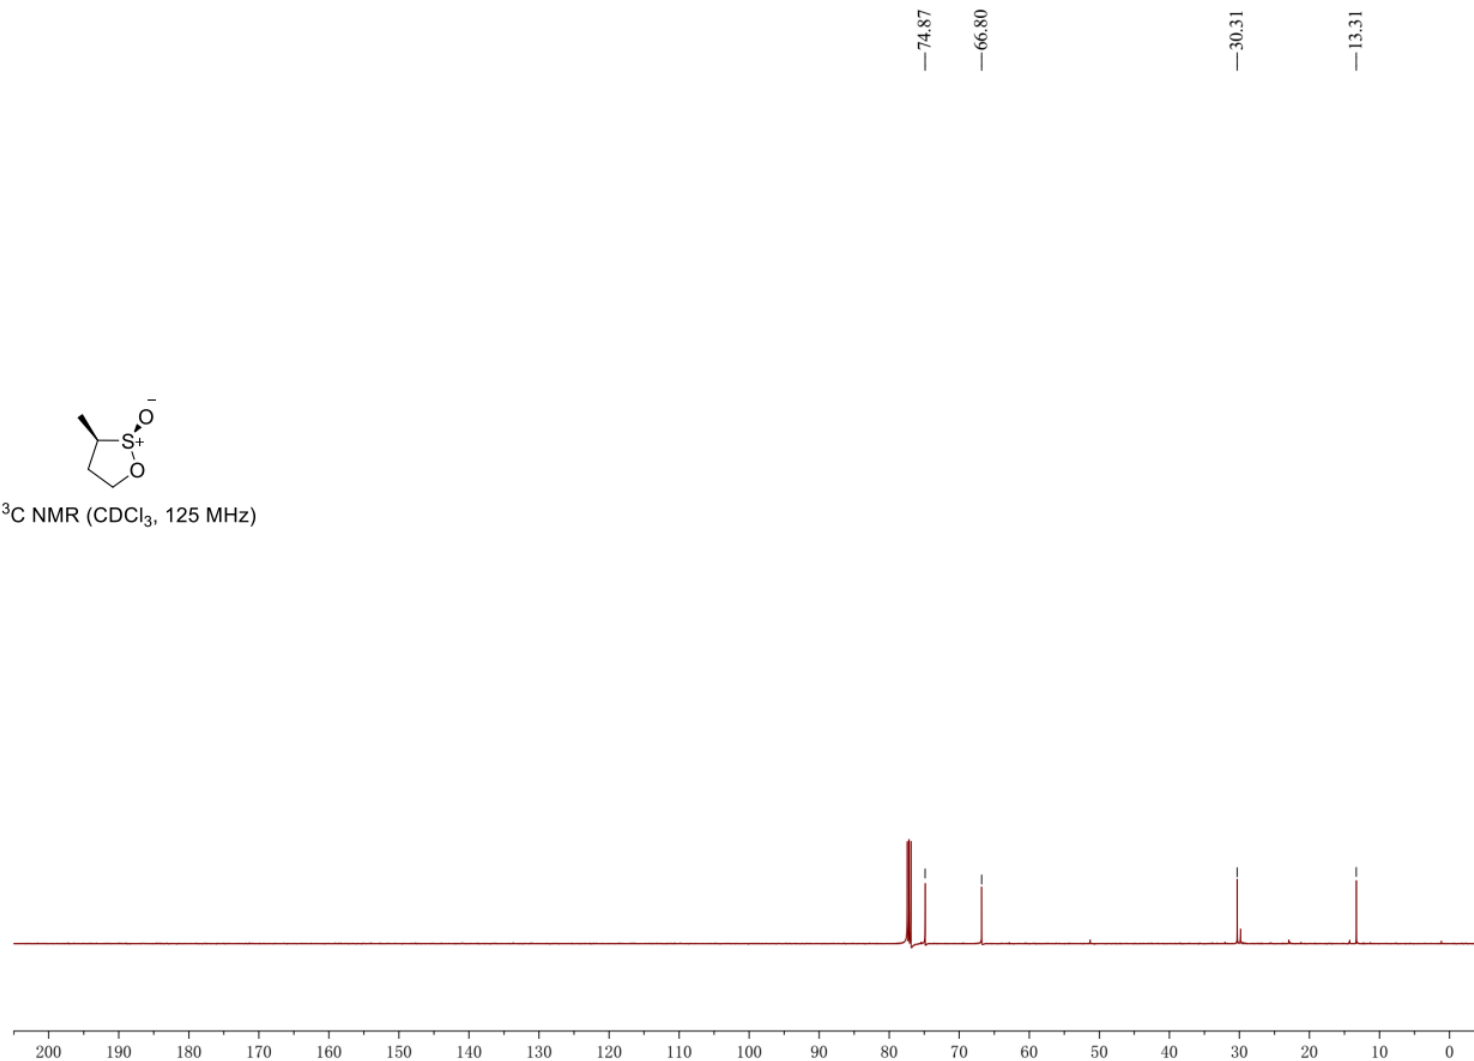

**N-(4-(Allylsulfonyl)butyl)-2,2,2-trifluoroacetamide (22a)**

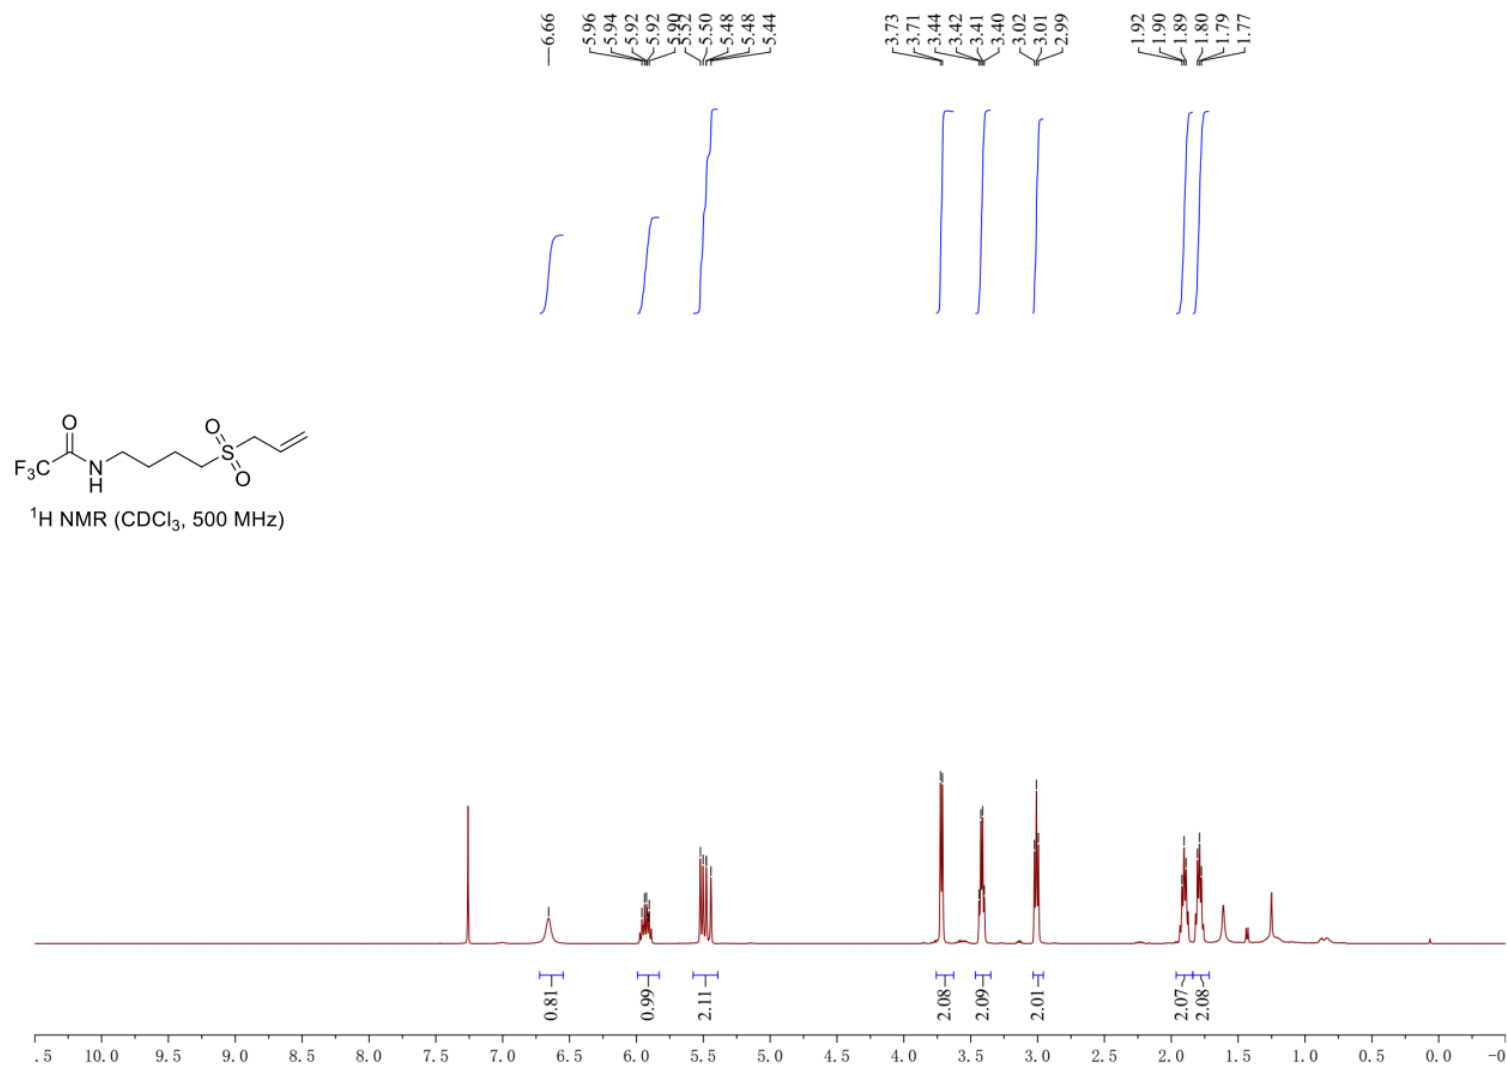

[Go back to table of contents](#)

### N-(4-(Allylsulfonyl)butyl)-2,2,2-trifluoroacetamide (22a)

157.77  
157.48  
125.02  
119.66  
117.06  
114.77  
112.57  
100.14  
58.30  
50.34  
39.24  
27.77  
18.99

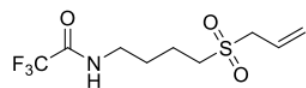

<sup>13</sup>C NMR (CDCl<sub>3</sub>, 125 MHz)

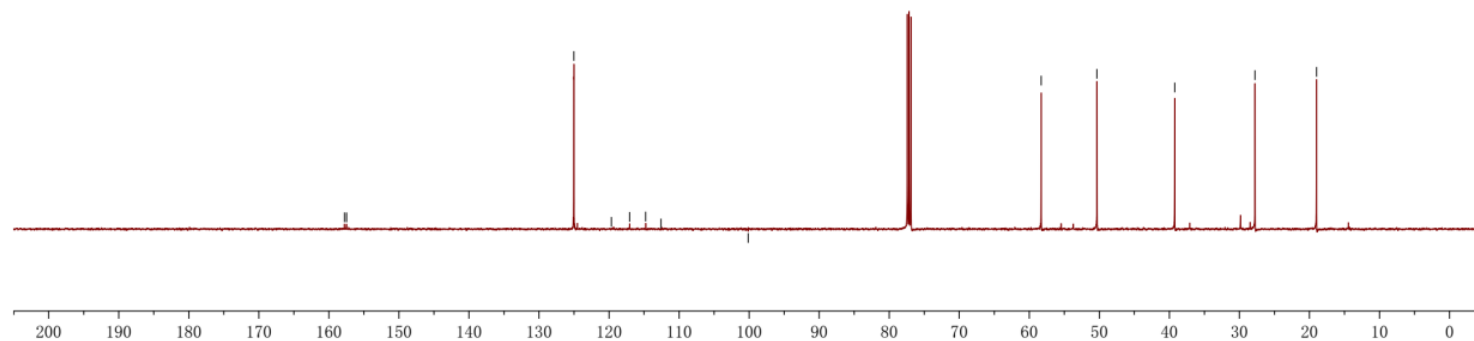

[Go back to table of contents](#)

### N-(3-(Allylsulfonyl)butyl)-2,2,2-trifluoroacetamide (22b)

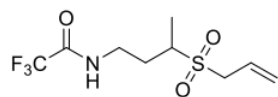

<sup>1</sup>H NMR (CDCl<sub>3</sub>, 500 MHz)

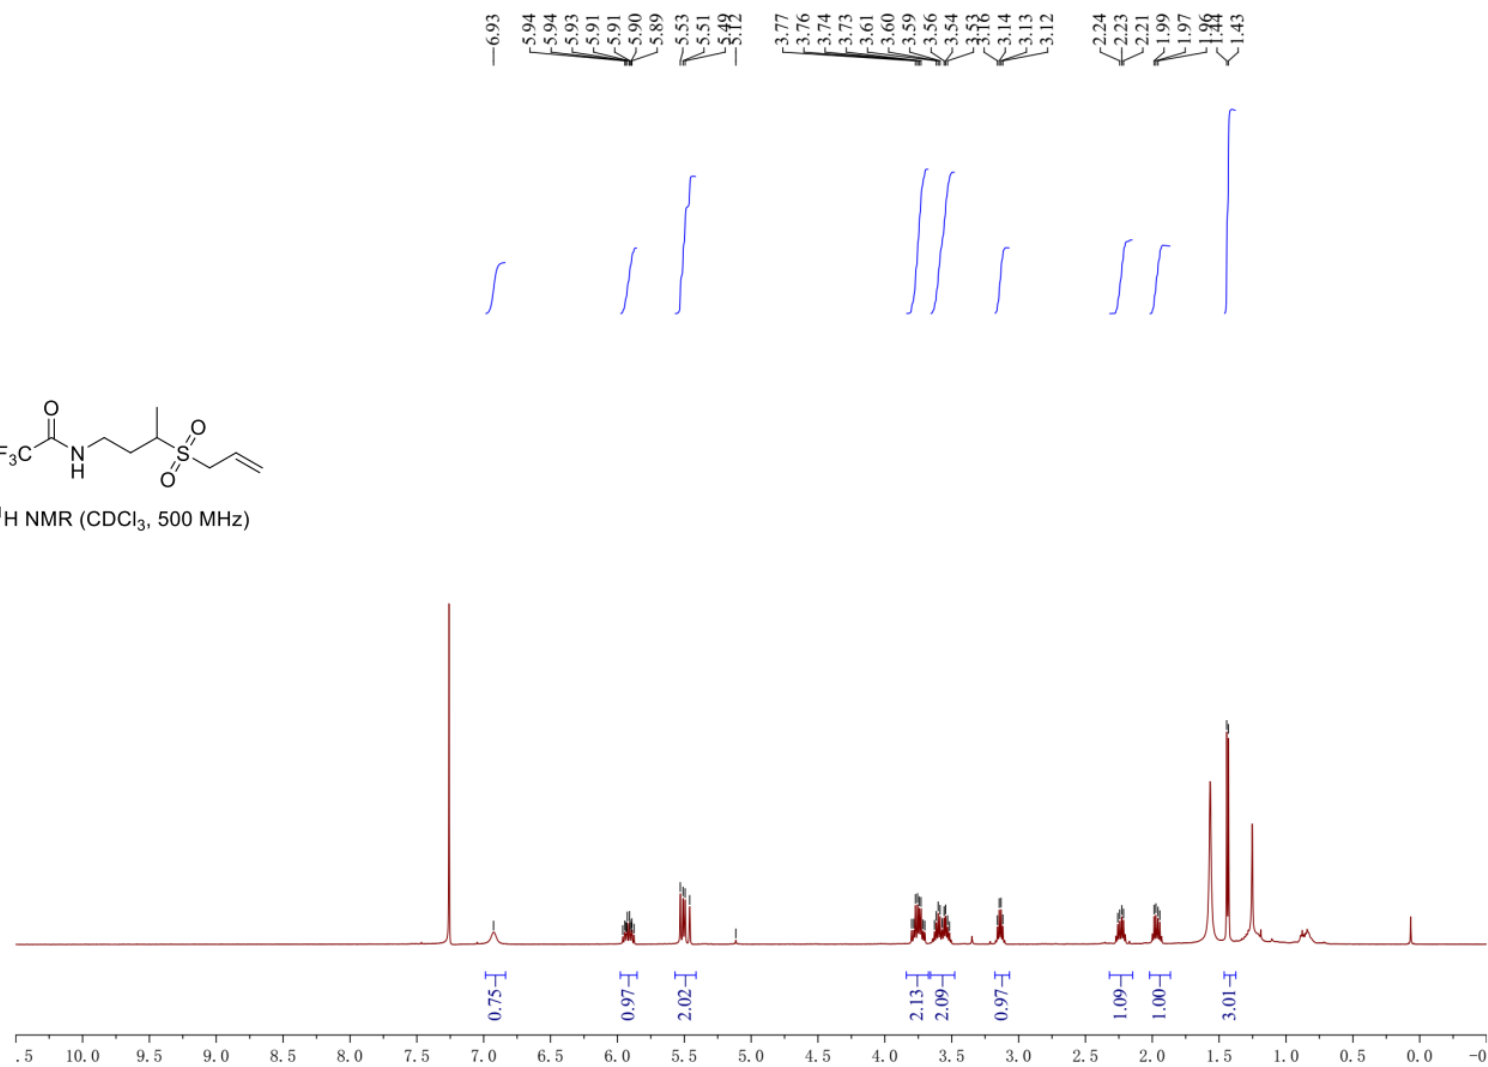

[Go back to table of contents](#)



### N-(3-(Allylsulfonyl)butyl)-2,2,2-trifluoroacetamide (22b)

158.19  
157.89  
157.60  
157.30

125.14  
124.47  
119.32  
117.03  
114.75  
112.46

55.41  
53.71

37.08

28.40

14.38

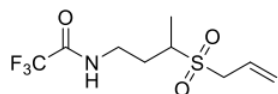

<sup>13</sup>C NMR (CDCl<sub>3</sub>, 125 MHz)

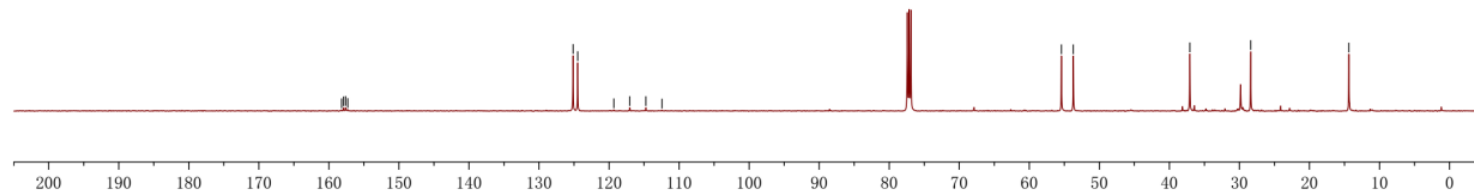

[Go back to table of contents](#)

### N-(2-(Allylsulfonyl)butyl)-2,2,2-trifluoroacetamide (22c)

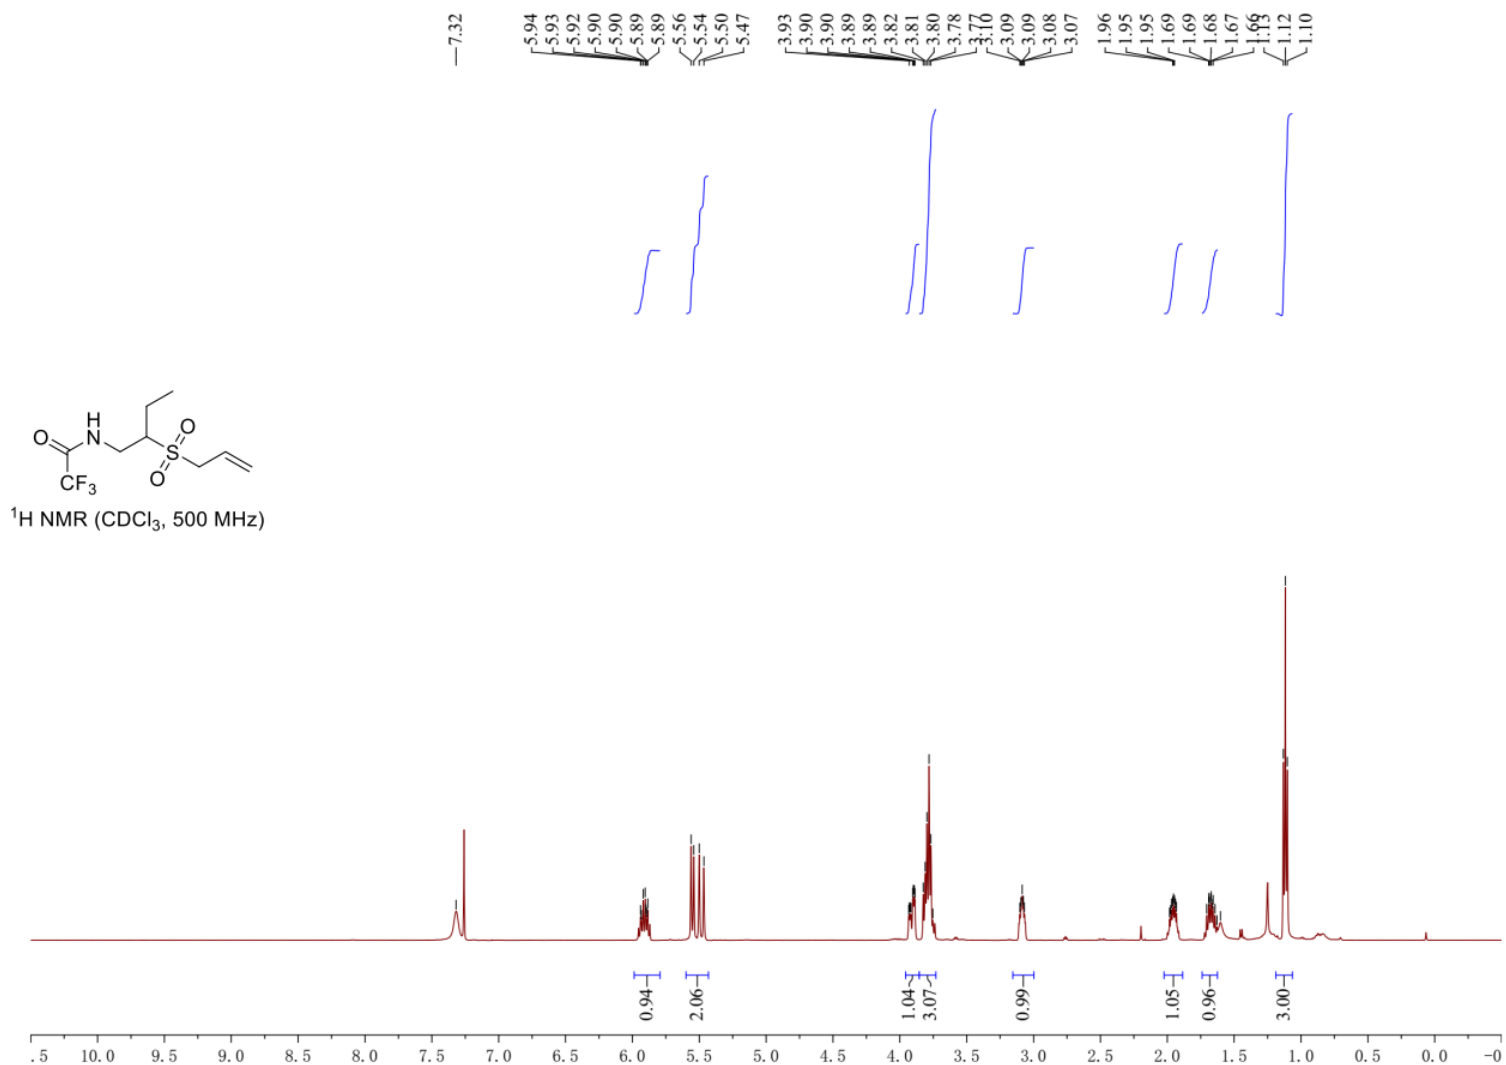

### N-(2-(Allylsulfonyl)butyl)-2,2,2-trifluoroacetamide (22c)

157.74  
157.44

125.66  
124.23

116.92  
114.63

61.01  
56.77

36.15

19.66

11.13

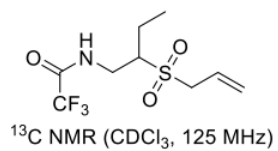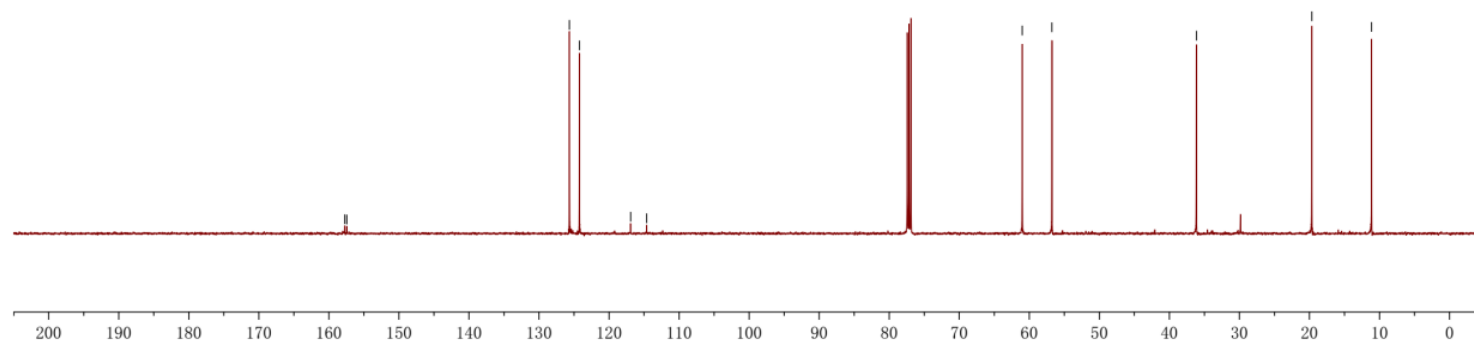

[Go back to table of contents](#)

### Methyl C<sup>4</sup>-(allylsulfonyl)(2,2,2-trifluoroacetyl)-L-valinate (23)

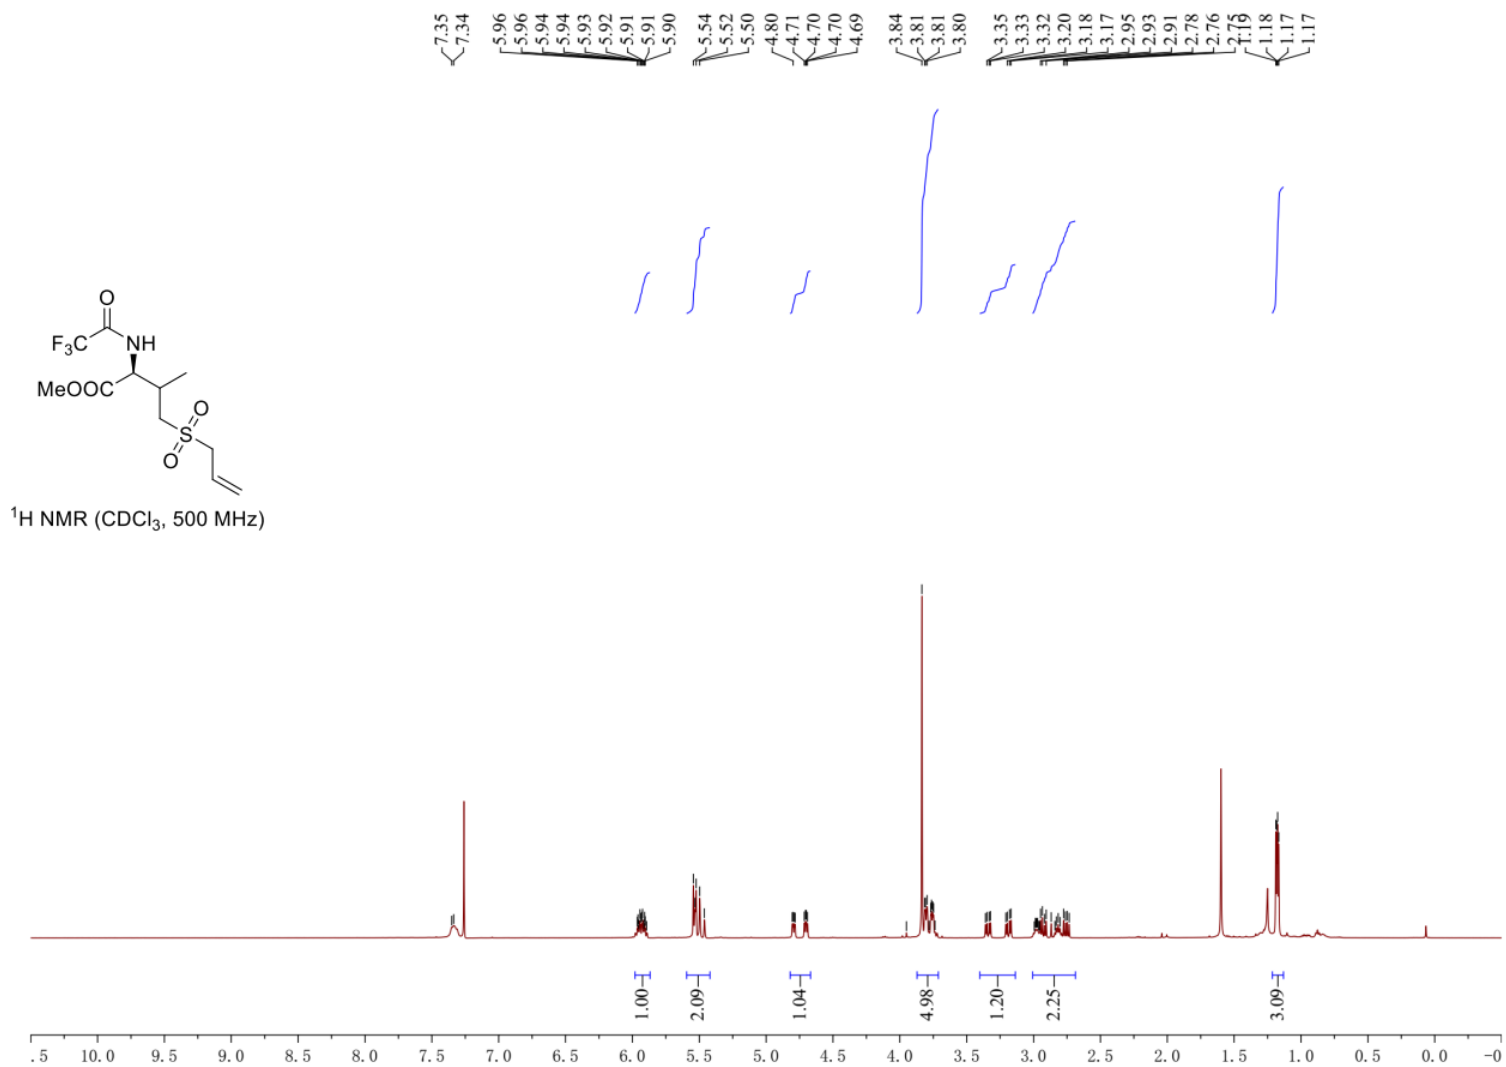

[Go back to table of contents](#)

### Methyl C<sup>4</sup>-(allylsulfonyl)(2,2,2-trifluoroacetyl)-L-valinate (23)

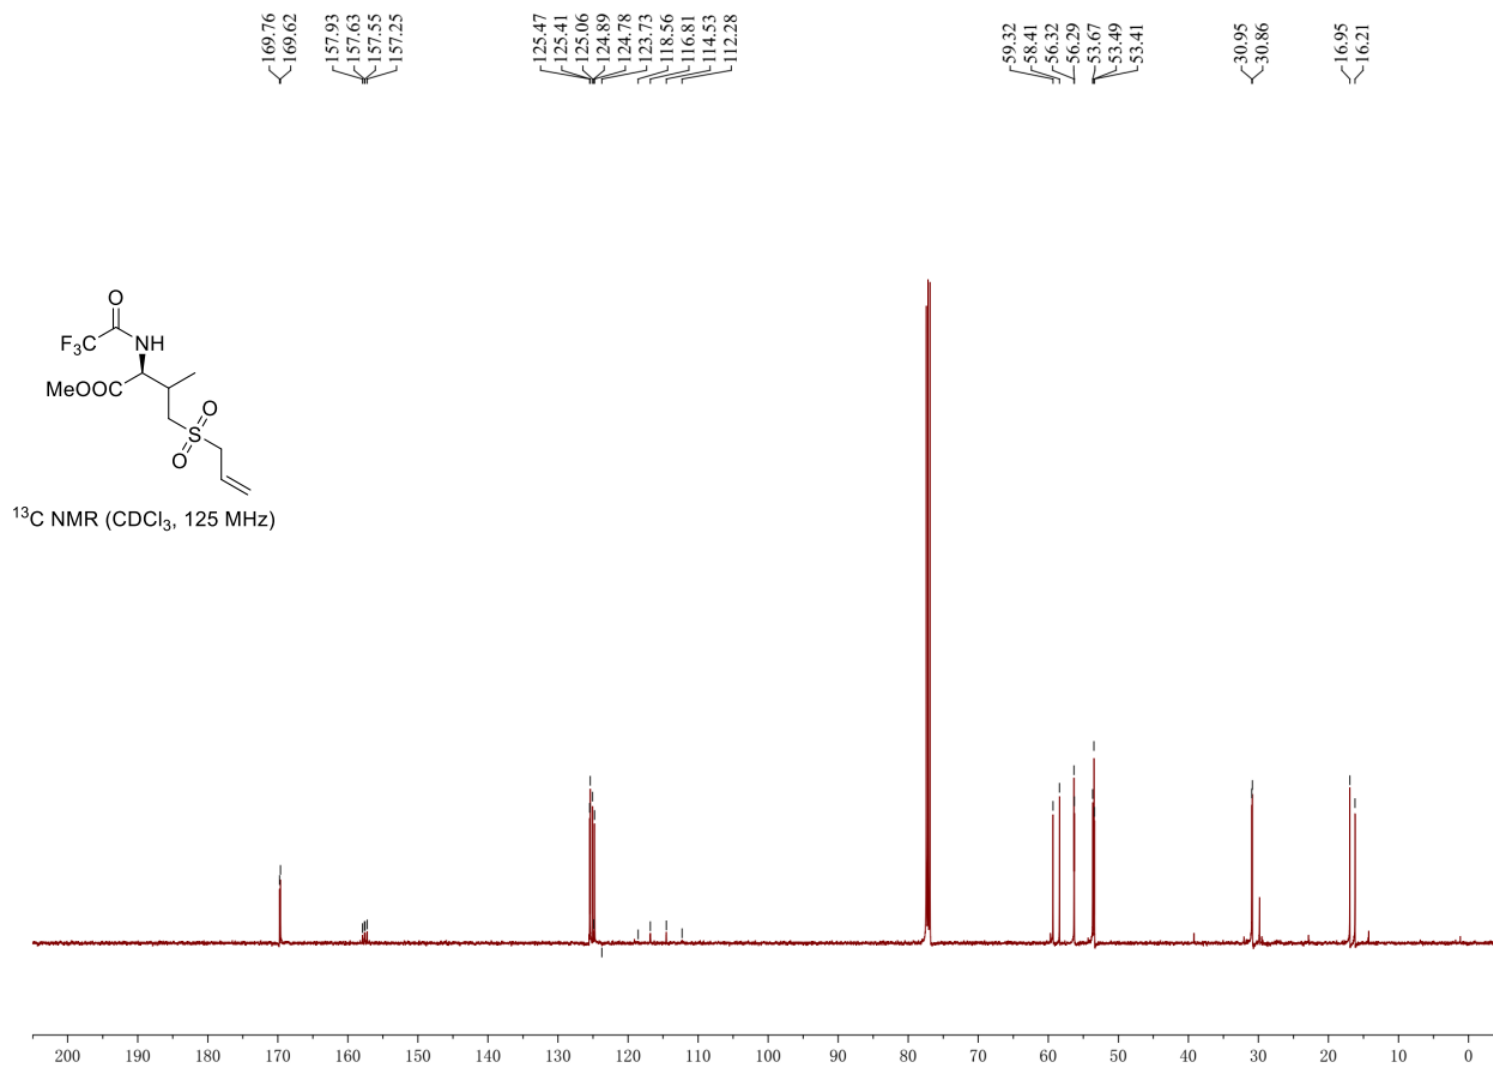

[Go back to table of contents](#)

Methyl 2-(4-(3-(allylsulfonyl)-2-methylpropyl)phenyl)propanoate (24a)

Methyl 2-(4-(2-(allylsulfonyl)-2-methylpropyl)phenyl)propanoate (24b)

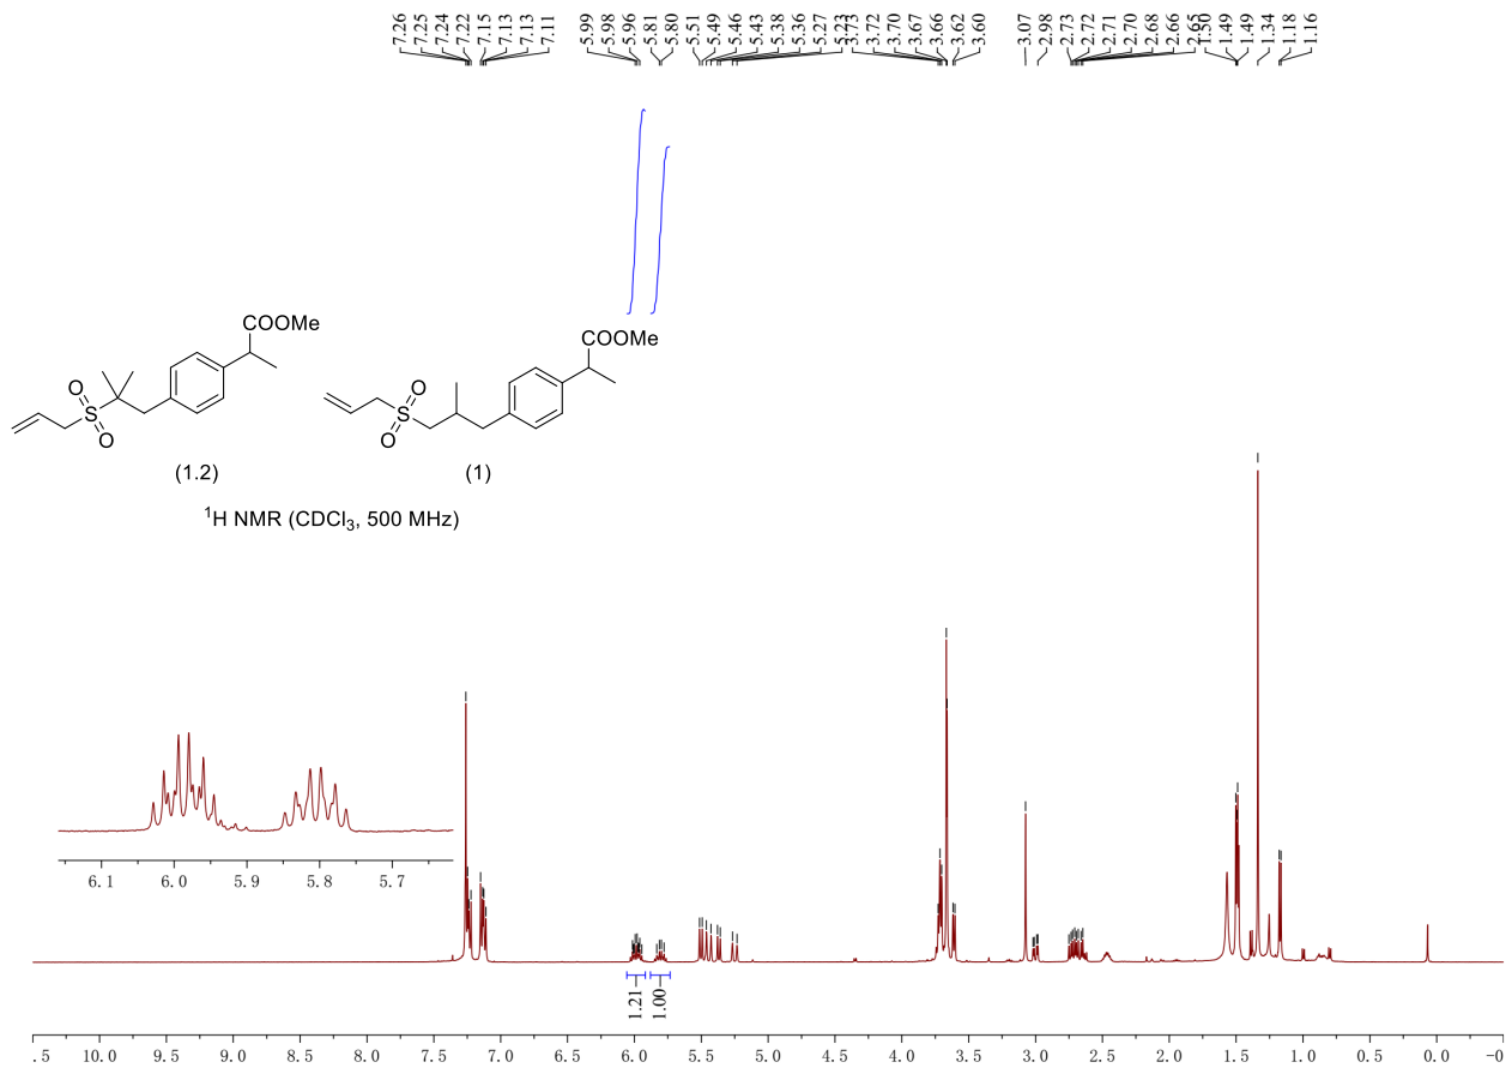

[Go back to table of contents](#)

**Methyl 2-(4-(3-(allylsulfonyl)-2-methylpropyl)phenyl)propanoate (24a)**

**Methyl 2-(4-(2-(allylsulfonyl)-2-methylpropyl)phenyl)propanoate (24b)**

175.14  
175.04

139.68  
138.97  
137.89  
133.84  
131.39  
129.70  
127.78  
127.60  
125.30  
124.62  
124.46

64.03  
58.94  
56.16  
52.54  
52.23  
52.18  
45.16  
42.65  
40.19  
30.36  
20.73  
20.26  
18.73

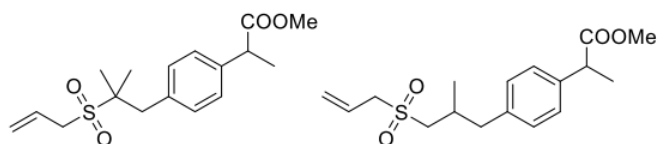

$^{13}\text{C}$  NMR ( $\text{CDCl}_3$ , 125 MHz)

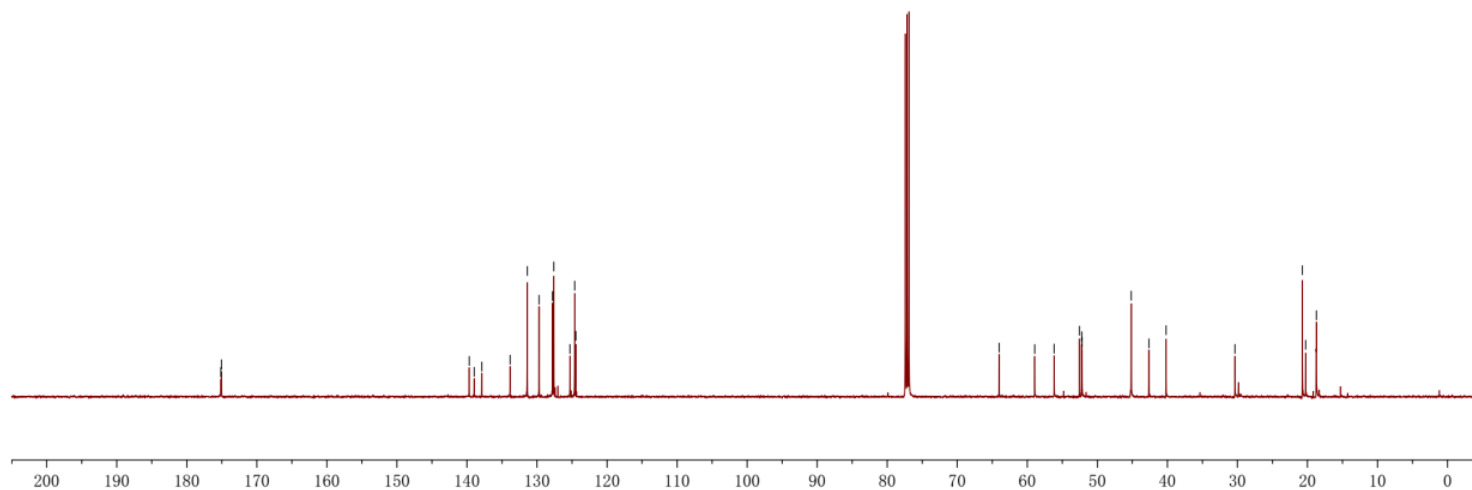

[Go back to table of contents](#)

## 2-(Allylsulfonyl)-1,4-dioxane (25)

5.89  
5.88  
5.87  
5.86  
5.85  
5.84  
5.83  
5.82  
5.82  
5.80  
5.47  
5.46  
5.42  
4.57  
4.57  
4.56  
4.55  
4.22  
4.21  
4.20  
4.20  
4.19  
4.18  
4.18  
4.17  
4.08  
4.06  
4.05  
4.04  
4.02  
4.01  
3.99  
3.99  
3.93  
3.91  
3.90  
3.88  
3.74  
3.73  
3.72  
3.71  
3.70  
3.69  
3.67  
3.66  
3.64

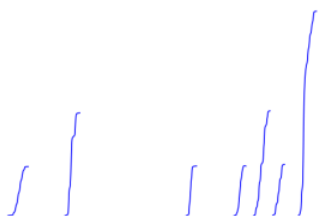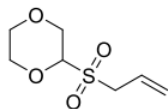

$^1\text{H}$  NMR ( $\text{CDCl}_3$ , 500 MHz)

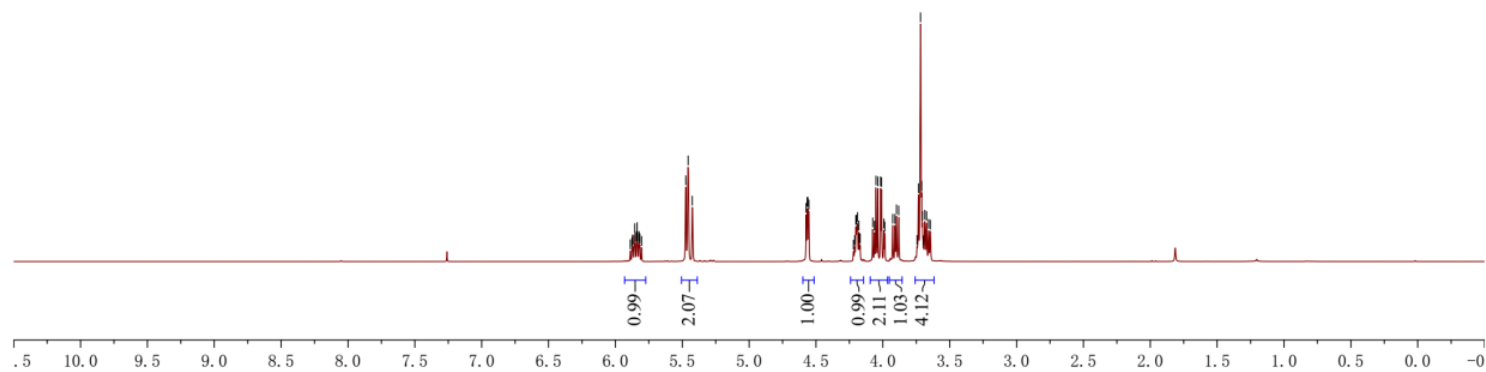

[Go back to table of contents](#)



## 2-(Allylsulfonyl)-1,4-dioxane (25)

125.21  
124.06  
83.35  
65.95  
65.51  
62.45  
54.69

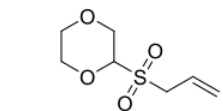

$^{13}\text{C}$  NMR ( $\text{CDCl}_3$ , 125 MHz)

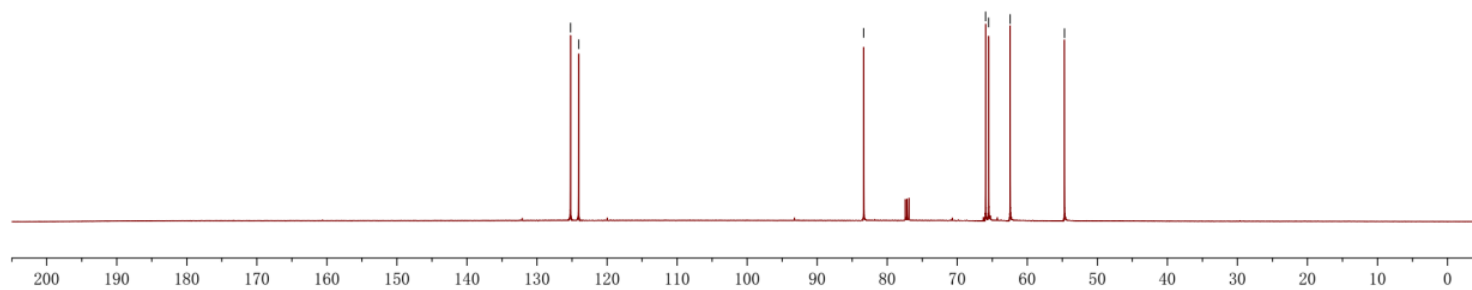

[Go back to table of contents](#)

## 2-(Allylsulfonyl)tetrahydrofuran (26)

5.96  
5.95  
5.94  
5.94  
5.92  
5.92  
5.91  
5.91  
5.90  
5.89  
5.89  
5.89  
5.87  
5.81  
5.49  
5.47  
4.96  
4.95  
4.95  
4.94  
4.17  
4.16  
4.14  
4.13  
4.07  
4.06  
4.05  
4.04  
4.03  
3.95  
3.94  
3.93  
3.91  
3.71  
3.70  
3.69  
3.67  
3.59  
2.58  
2.57  
2.56  
2.55  
2.55  
2.54  
2.53  
2.27  
2.26  
2.25  
2.24  
2.23  
2.22  
2.22  
2.21  
2.21  
2.20  
2.20  
2.19  
2.17  
2.04  
1.99  
1.99  
1.98  
1.97  
1.97  
1.96  
1.96  
1.95  
1.94  
1.94

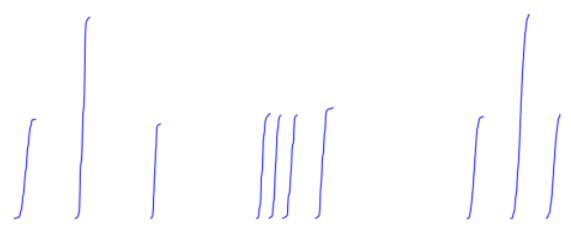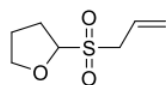

$^1\text{H}$  NMR ( $\text{CDCl}_3$ , 500 MHz)

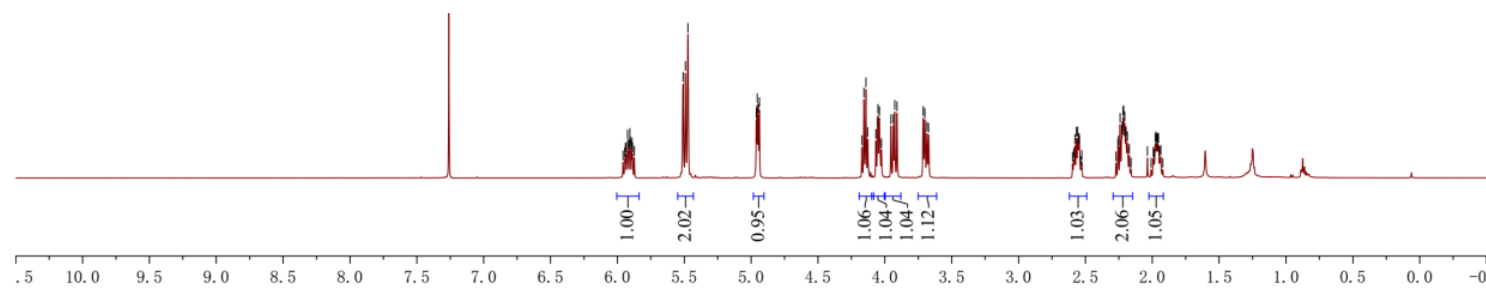

[Go back to table of contents](#)

## 2-(Allylsulfonyl)tetrahydrofuran (26)

124.92  
124.64  
89.89  
71.16  
54.15  
25.17  
24.62

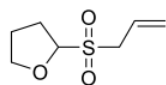

$^{13}\text{C}$  NMR ( $\text{CDCl}_3$ , 125 MHz)

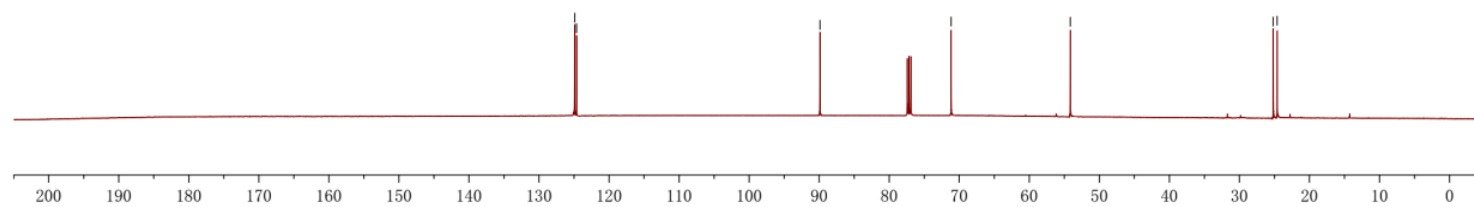

[Go back to table of contents](#)

### 3-(((Methoxymethoxy)methyl)sulfonyl)prop-1-ene (27)

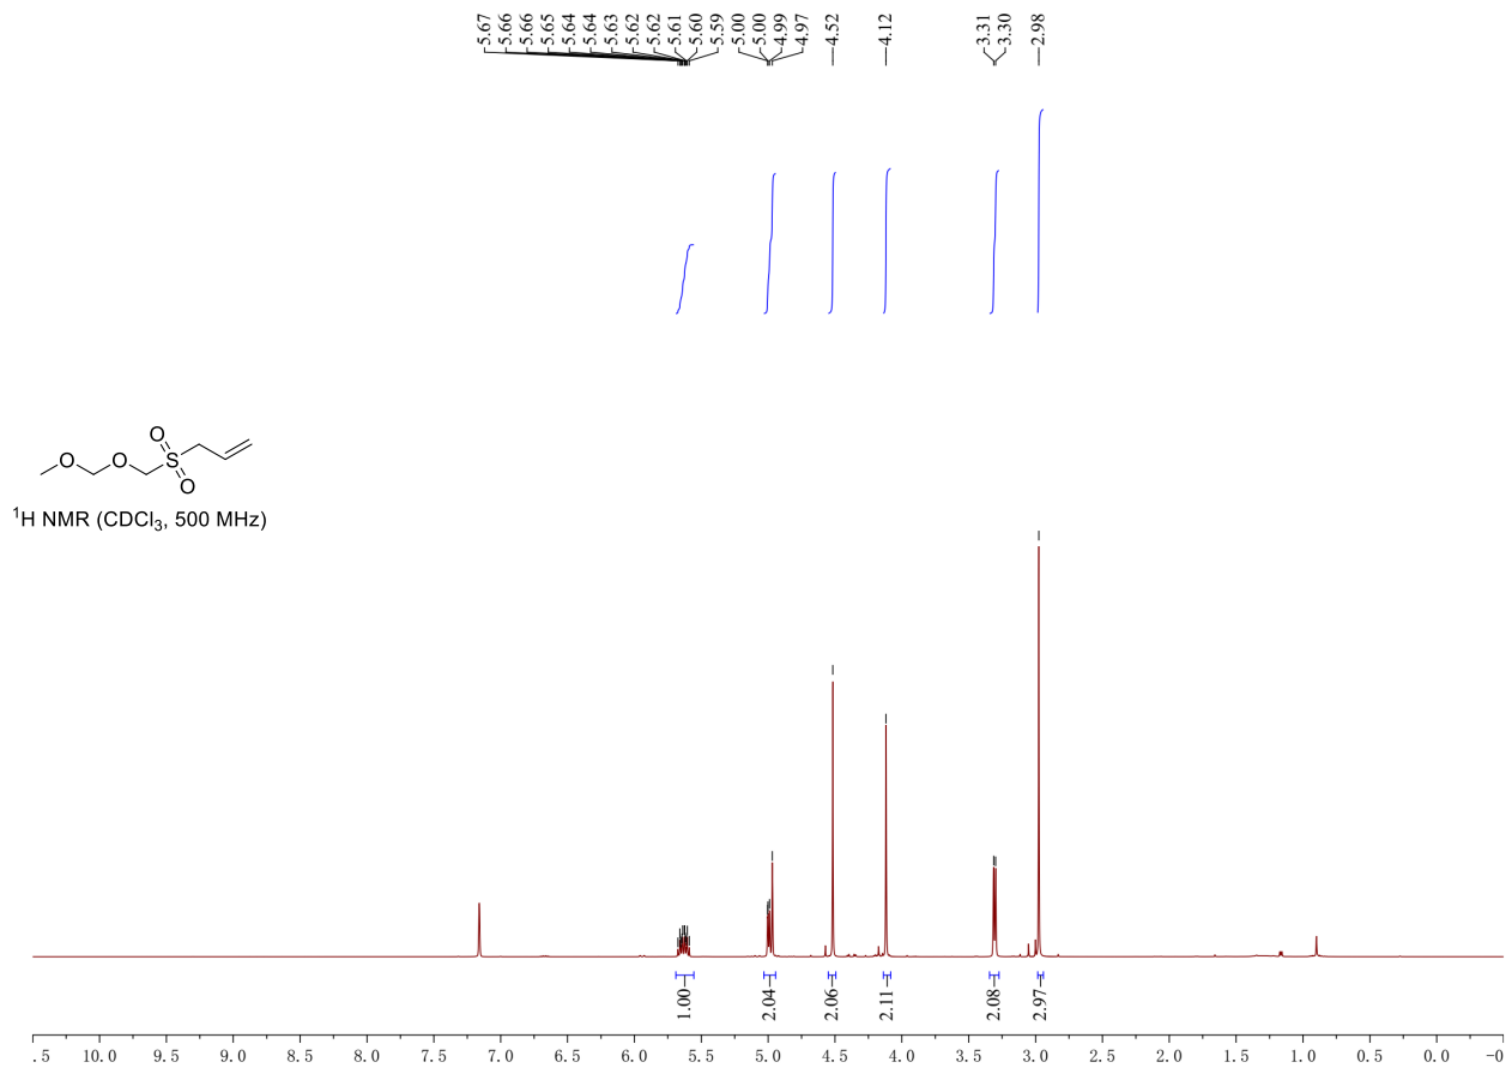

[Go back to table of contents](#)

### 3-(((Methoxymethoxy)methyl)sulfonyl)prop-1-ene (27)

125.42  
123.85  
96.96  
77.22  
55.82  
54.70

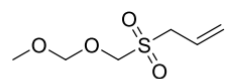

<sup>13</sup>C NMR (CDCl<sub>3</sub>, 125 MHz)

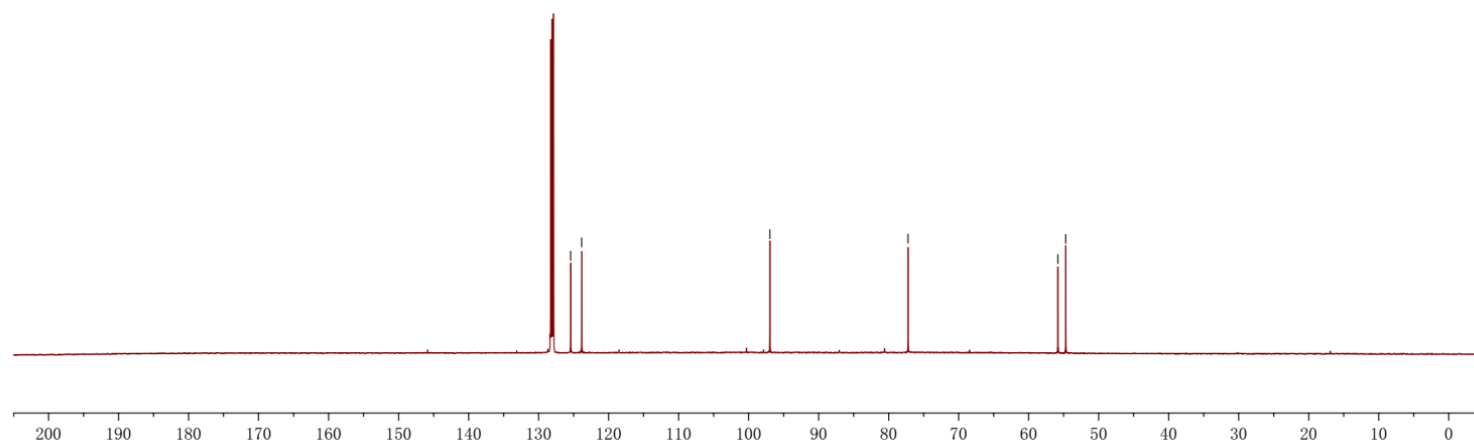

[Go back to table of contents](#)

3-((*tert*-Butoxymethyl)sulfonyl)prop-1-ene (28)

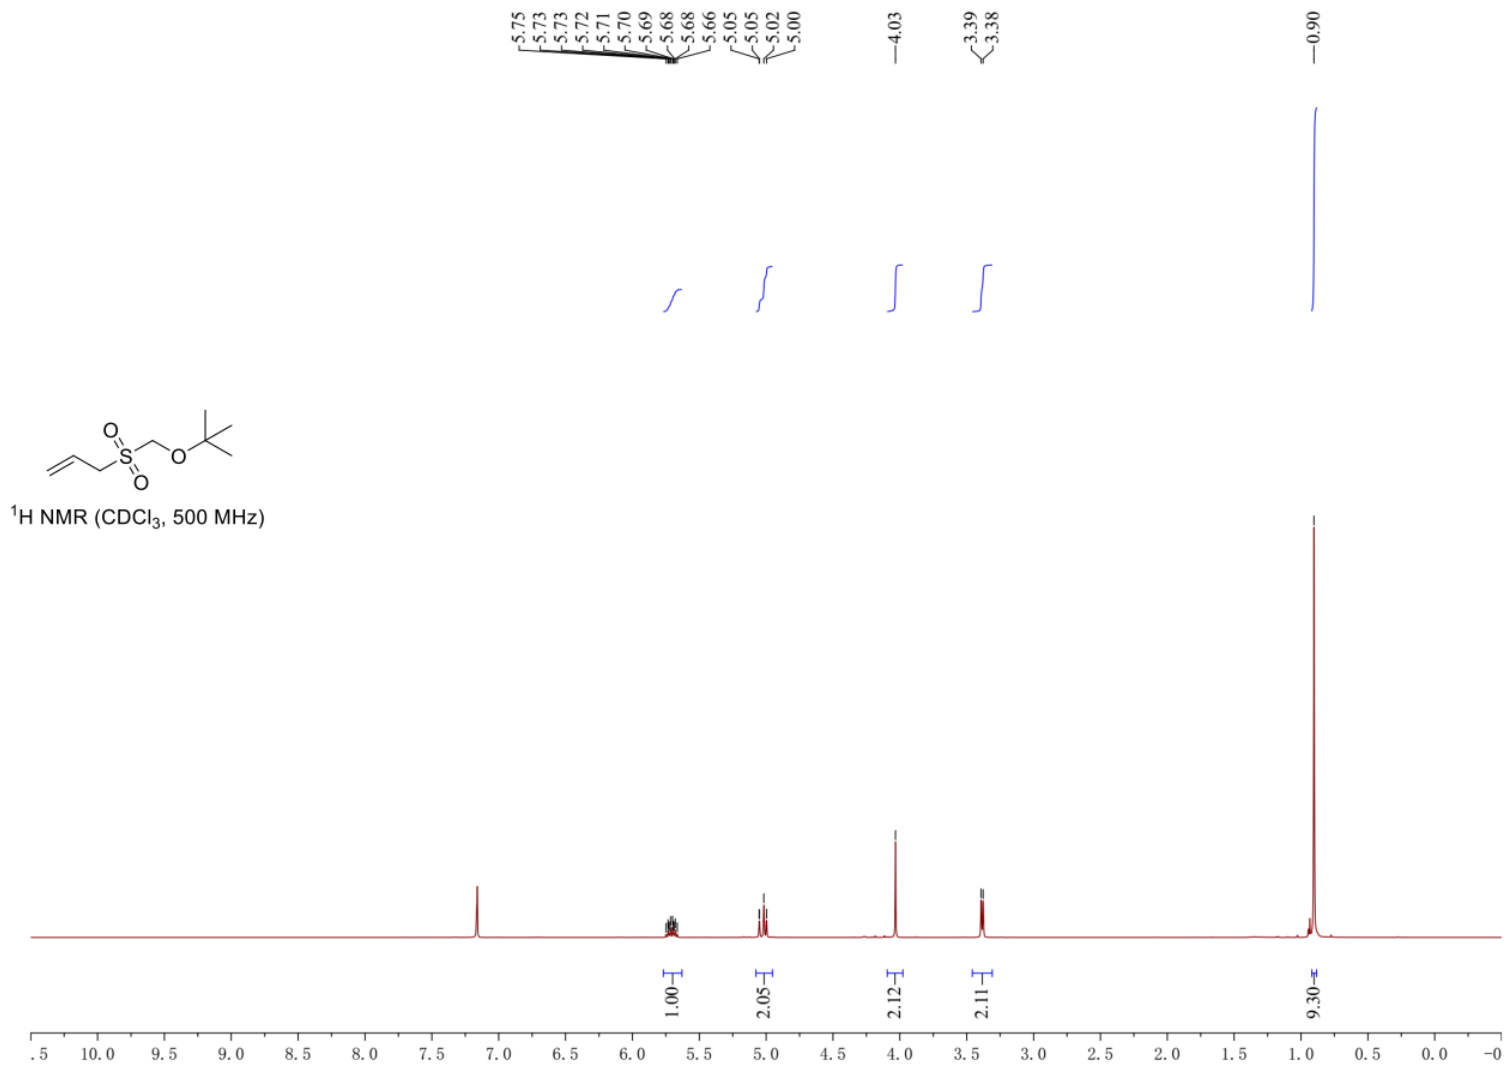

[Go back to table of contents](#)

### 3-((*tert*-Butoxymethyl)sulfonyl)prop-1-ene (28)

125.69  
123.57

77.04  
75.56

54.30

27.29

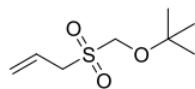

<sup>13</sup>C NMR (CDCl<sub>3</sub>, 125 MHz)

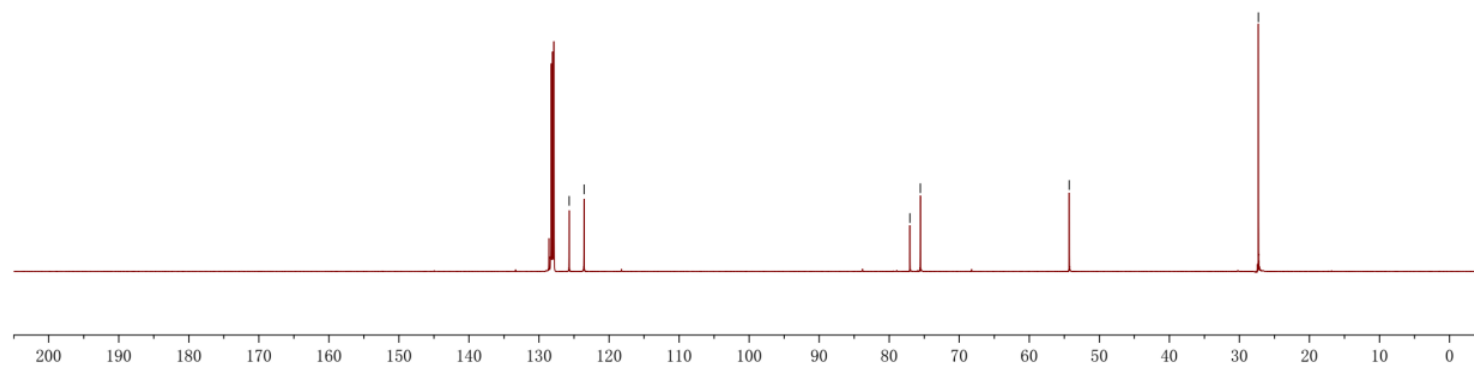

[Go back to table of contents](#)





## 2-(Allylsulfonyl)-1,4,7,10,13-pentaoxacyclopentadecane (29)

~125.08  
~123.79  
—94.65  
73.09  
71.01  
70.92  
70.88  
70.79  
70.73  
70.64  
69.62  
—55.84

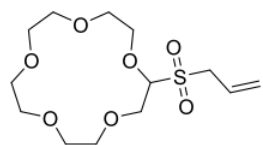

$^{13}\text{C}$  NMR ( $\text{C}_6\text{D}_6$ , 125 MHz)

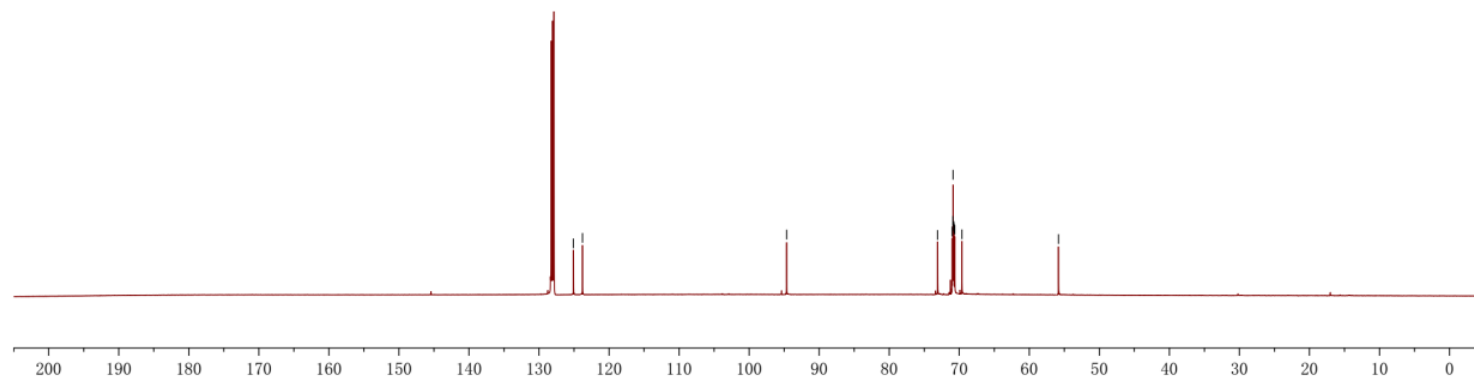

[Go back to table of contents](#)

## 2-(Allylsulfonyl)-1,4,7,10,13,16-hexaoxacyclooctadecane (30)

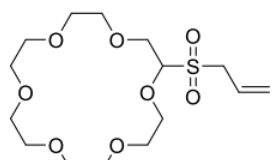

$^1\text{H NMR}$  ( $\text{C}_6\text{D}_6$ , 500 MHz)

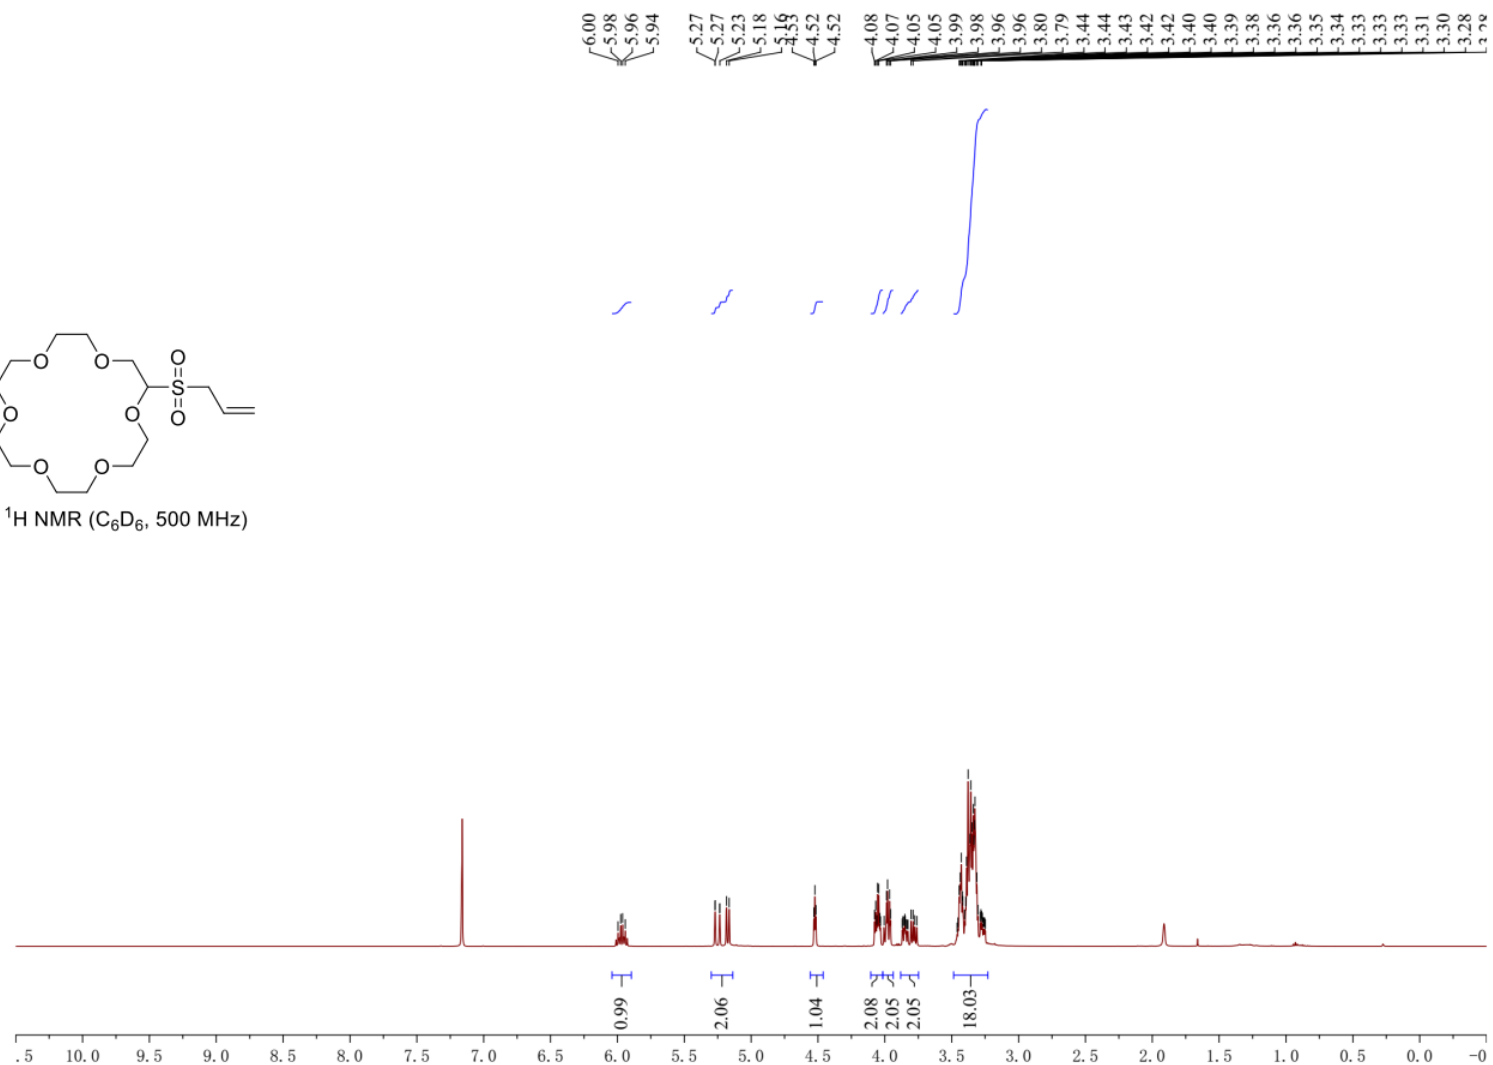

[Go back to table of contents](#)

## 2-(Allylsulfonyl)-1,4,7,10,13,16-hexaoxacyclooctadecane (30)

~125.13  
~123.95  
-94.82  
72.39  
71.29  
71.02  
70.97  
70.93  
70.85  
70.81  
70.76  
69.79  
-56.01

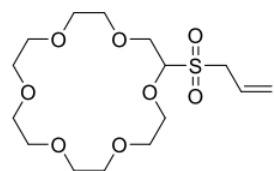

$^{13}\text{C}$  NMR ( $\text{C}_6\text{D}_6$ , 125 MHz)

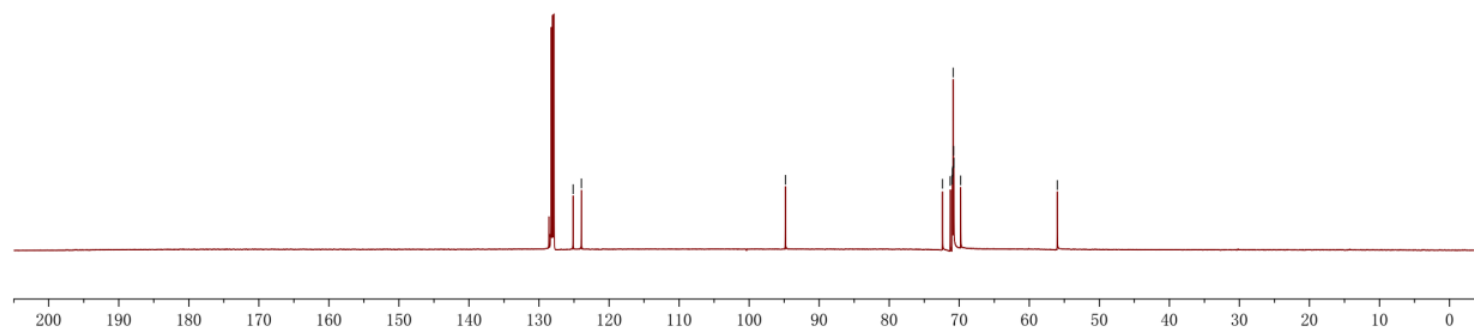

[Go back to table of contents](#)

(3*R*,3*aR*,6*R*,6*aR*)-3-((Allylsulfonyl)methoxy)-6-methoxyhexahydrofuro[3,2-*b*]furan (31a)

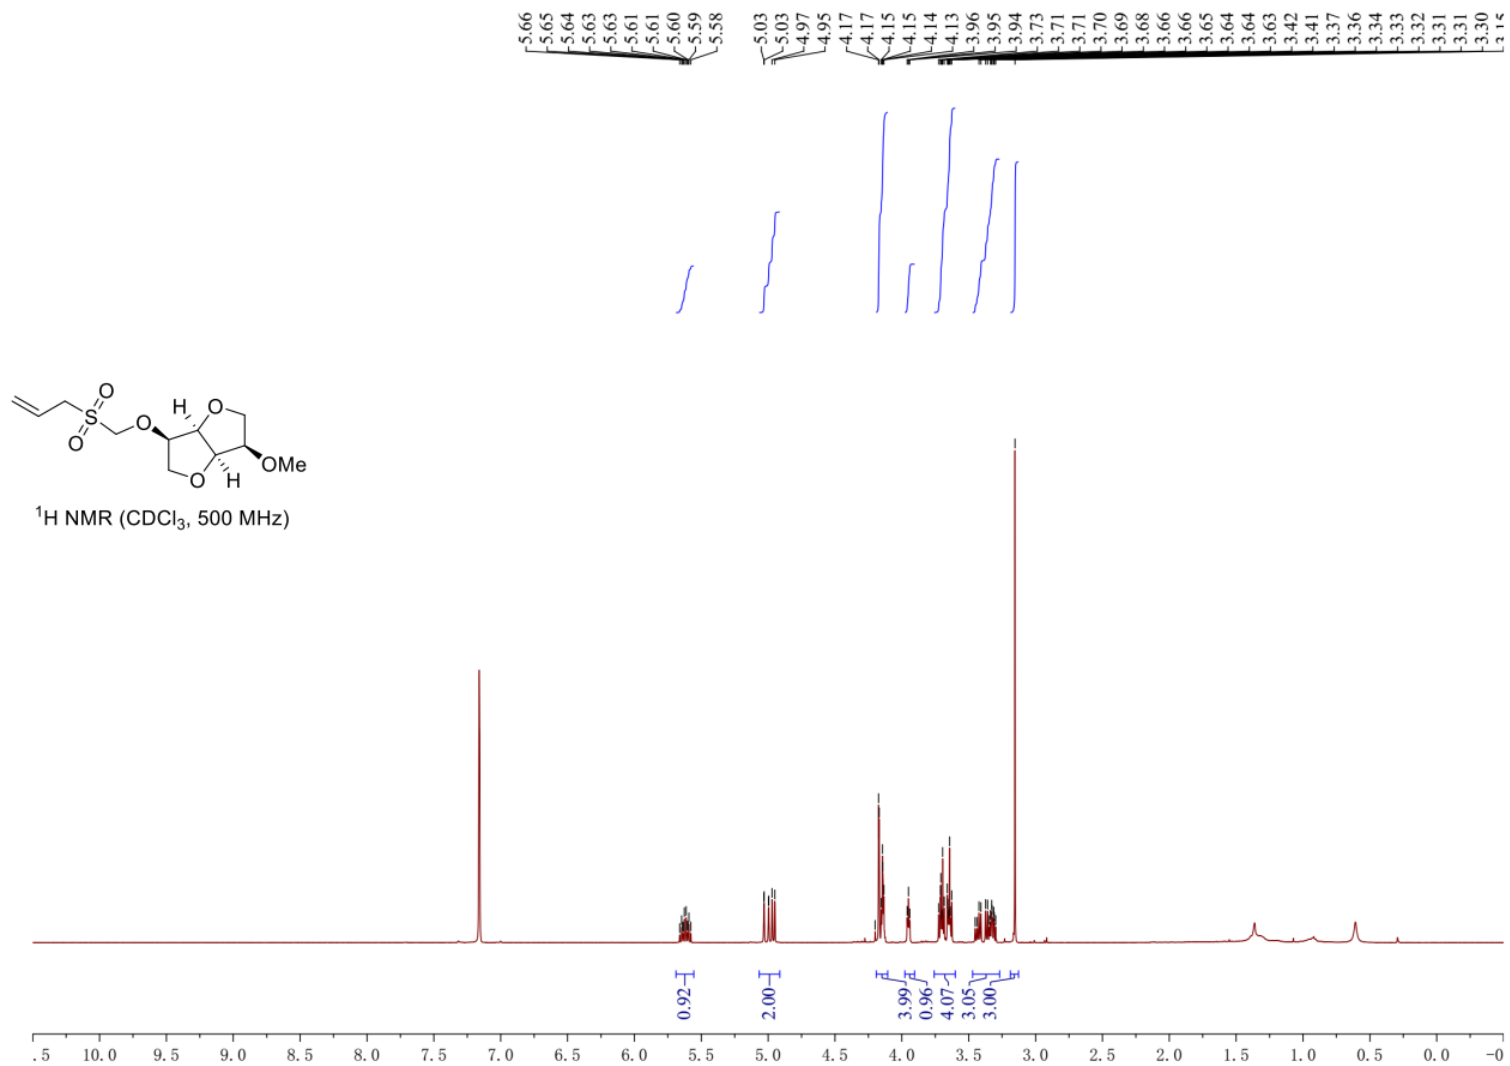

[Go back to table of contents](#)

(3*R*,3*aR*,6*R*,6*aR*)-3-((Allylsulfonyl)methoxy)-6-methoxyhexahydrofuro[3,2-*b*]furan (31a)

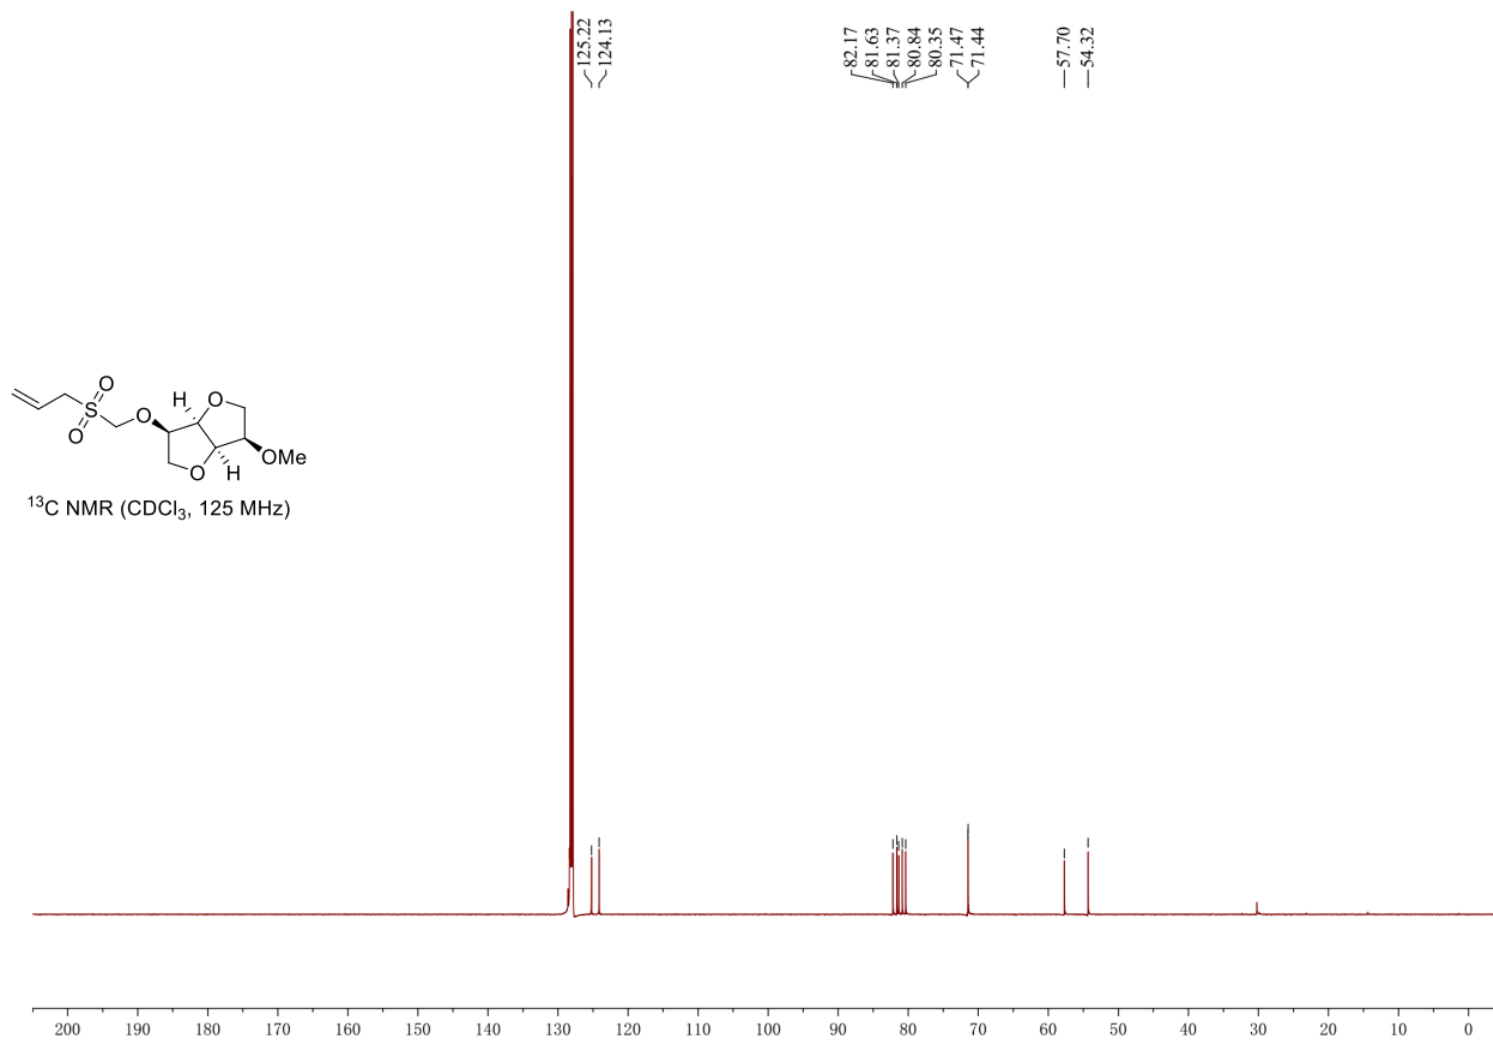

[Go back to table of contents](#)

(3*R*,3*aS*,6*R*,6*aR*)-3*a*-(Allylsulfonyl)-3,6-dimethoxyhexahydrofuro[3,2-*b*]furan (31b)

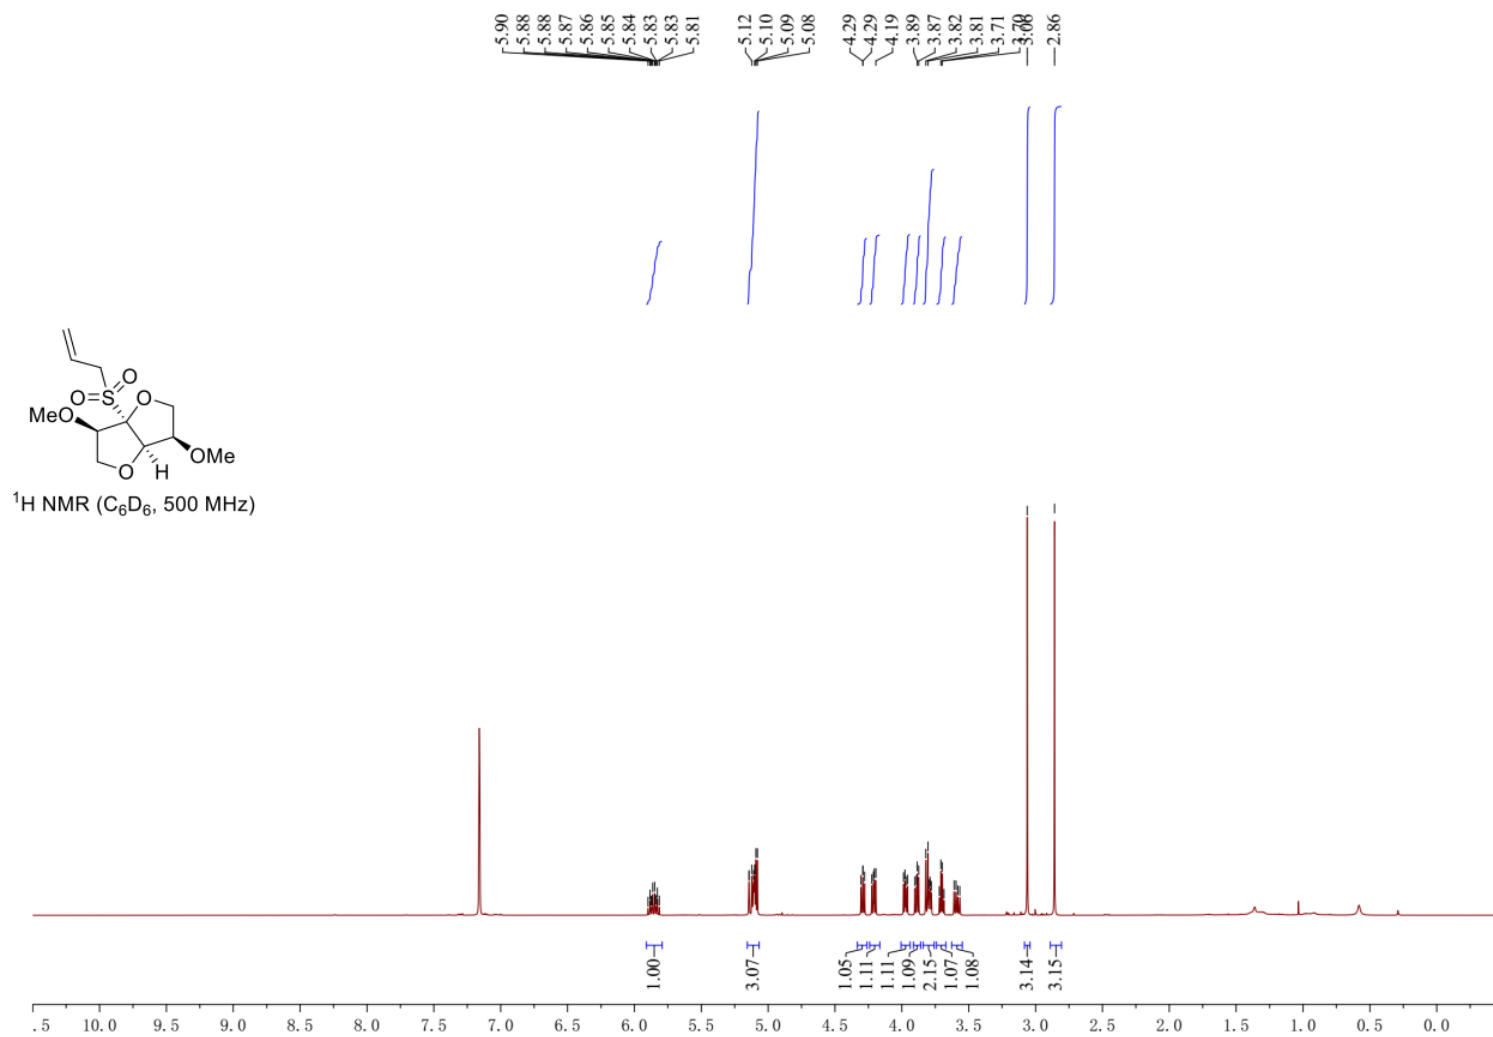

[Go back to table of contents](#)

**(3*R*,3*aS*,6*R*,6*aR*)-3*a*-(Allylsulfonyl)-3,6-dimethoxyhexahydrofuro[3,2-*b*]furan (31b)**

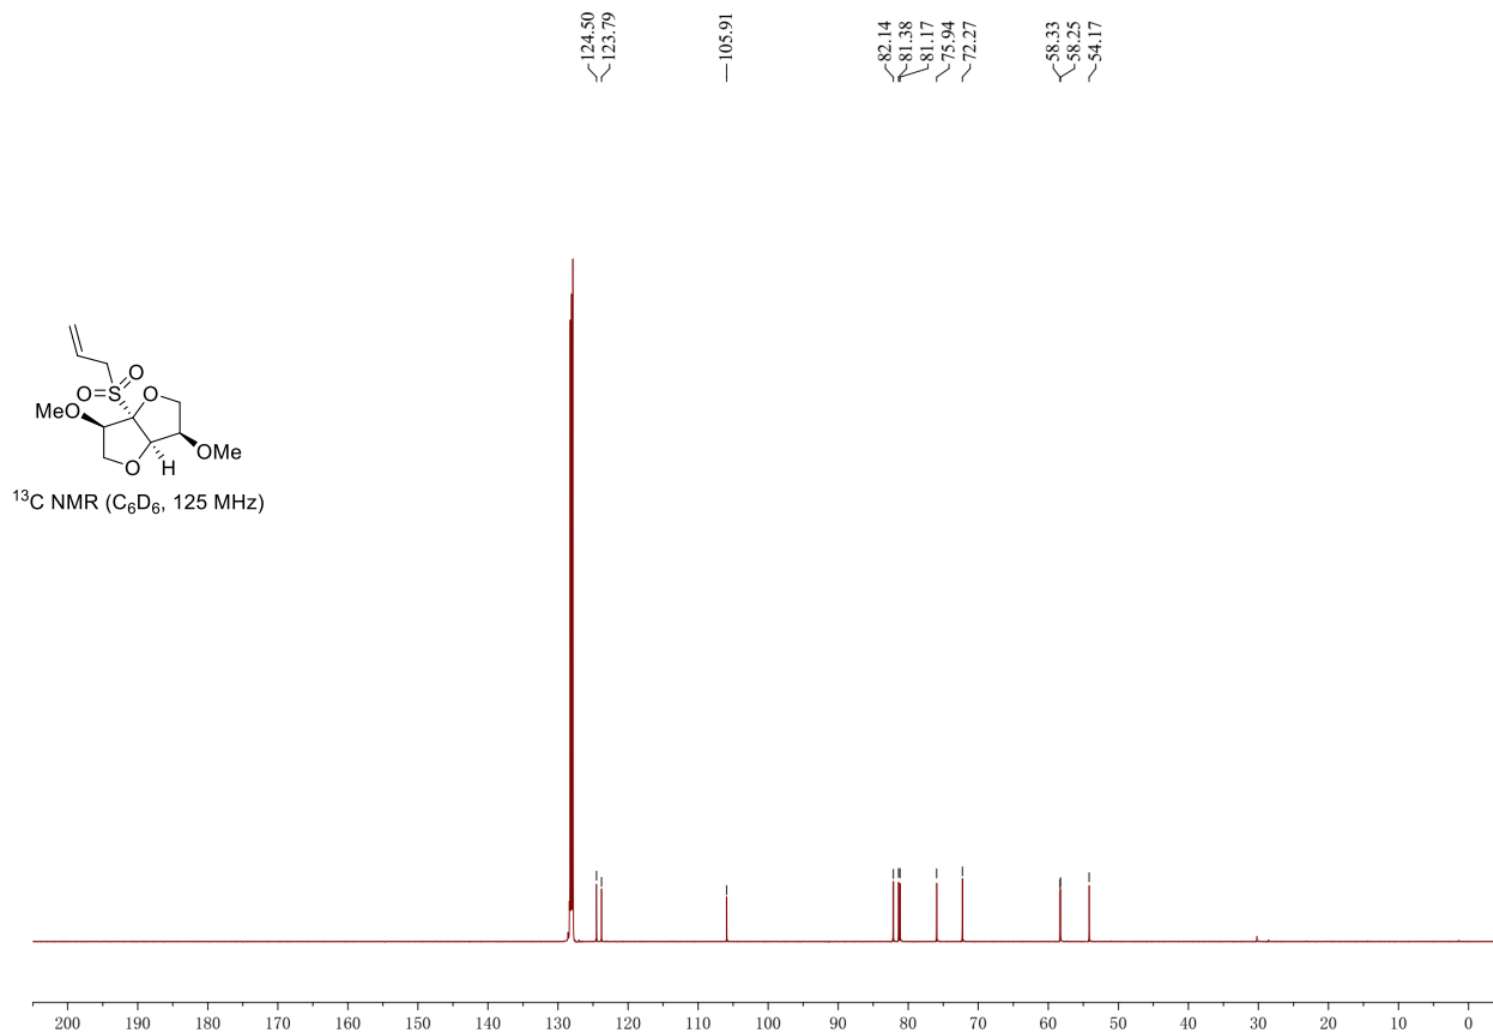

(2*R*,3*S*,3*aS*,6*R*,6*aR*)-2-(Allylsulfonyl)-3,6-dimethoxyhexahydrofuro[3,2-*b*]furan (31c)

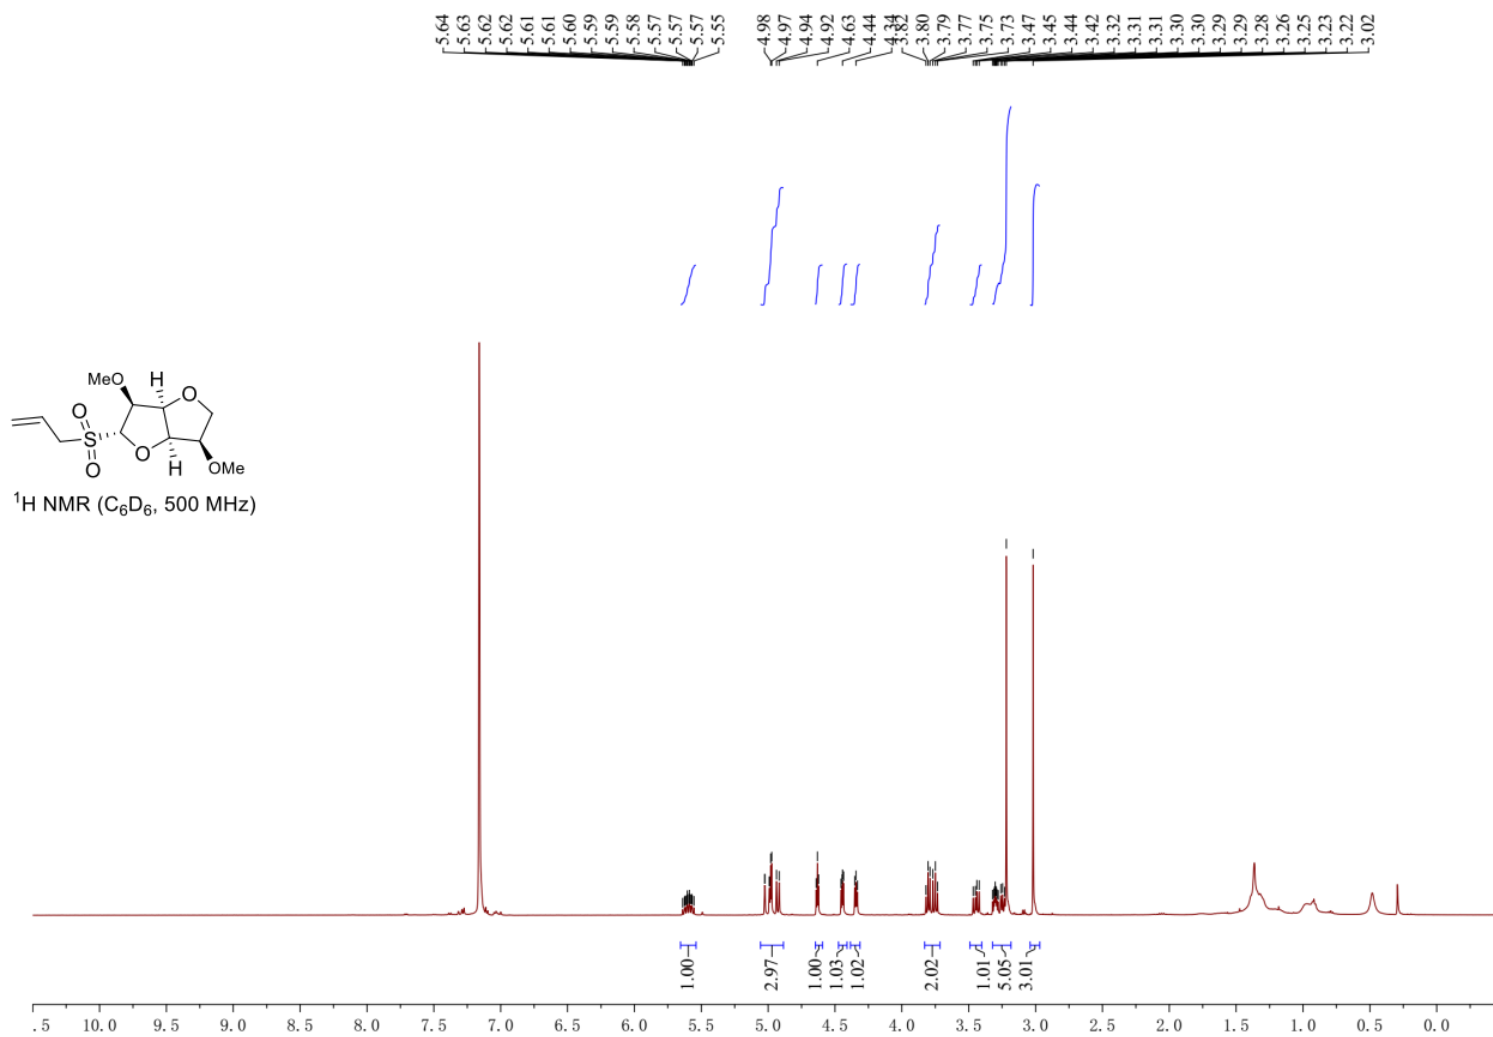



(2*R*,3*S*,3*aS*,6*R*,6*aR*)-2-(Allylsulfonyl)-3,6-dimethoxyhexahydrofuro[3,2-*b*]furan (31c)

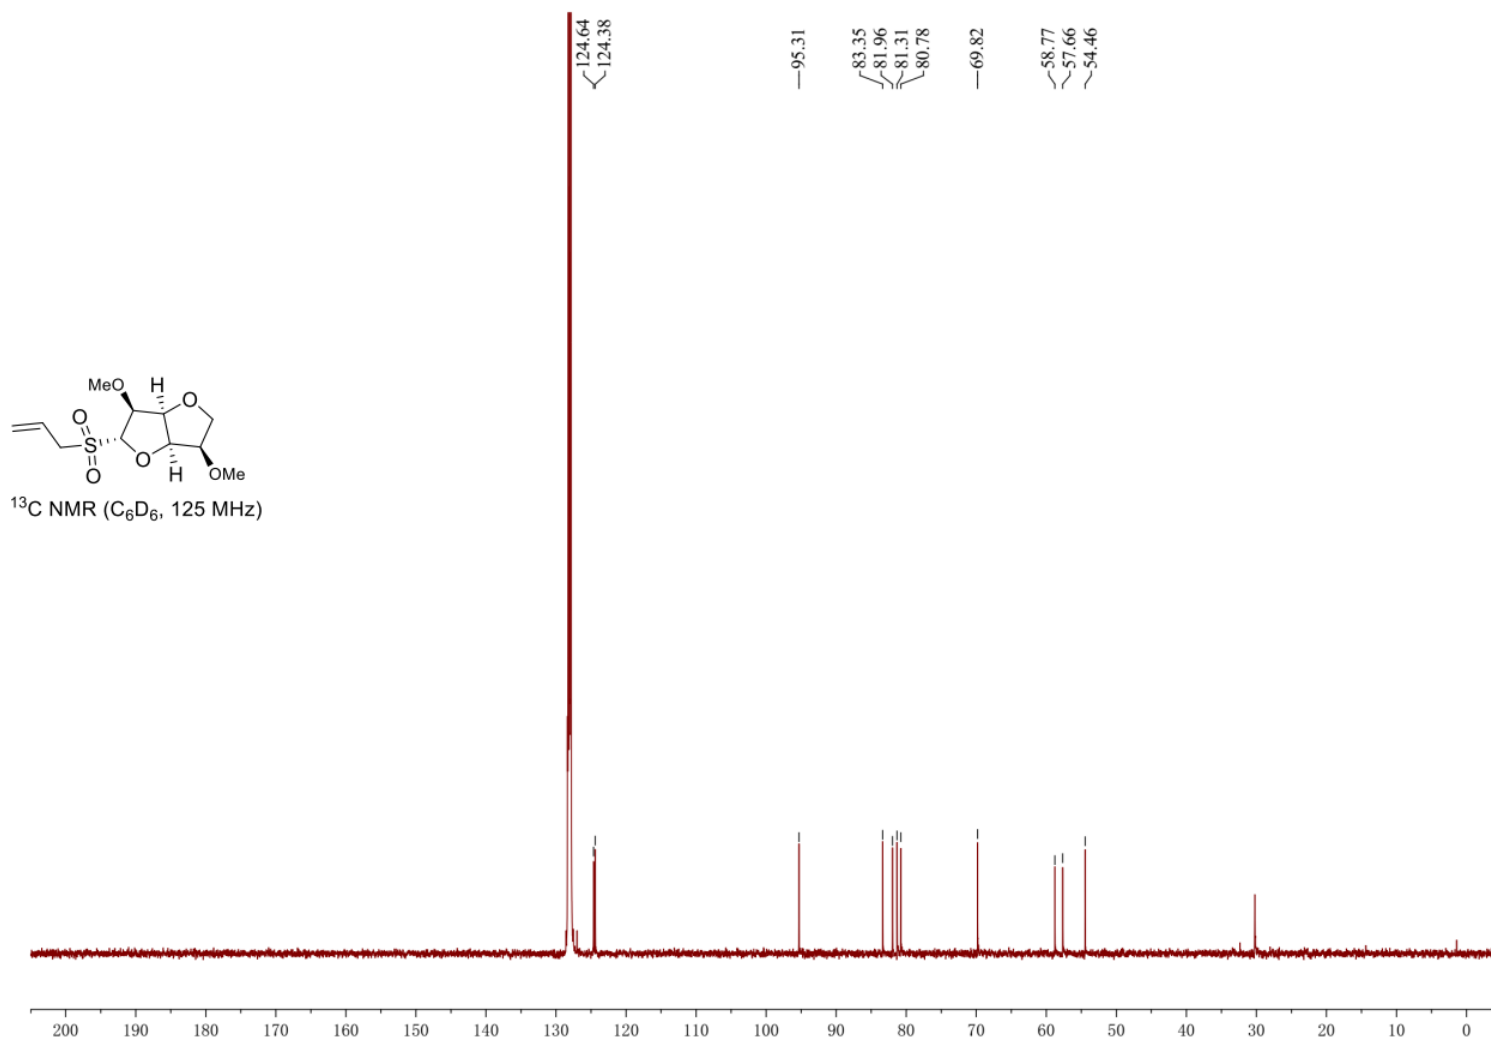

[Go back to table of contents](#)

### 4-Methyl-4-(methylsulfonyl)pentan-2-one (33)

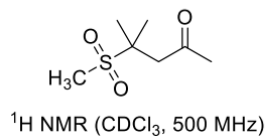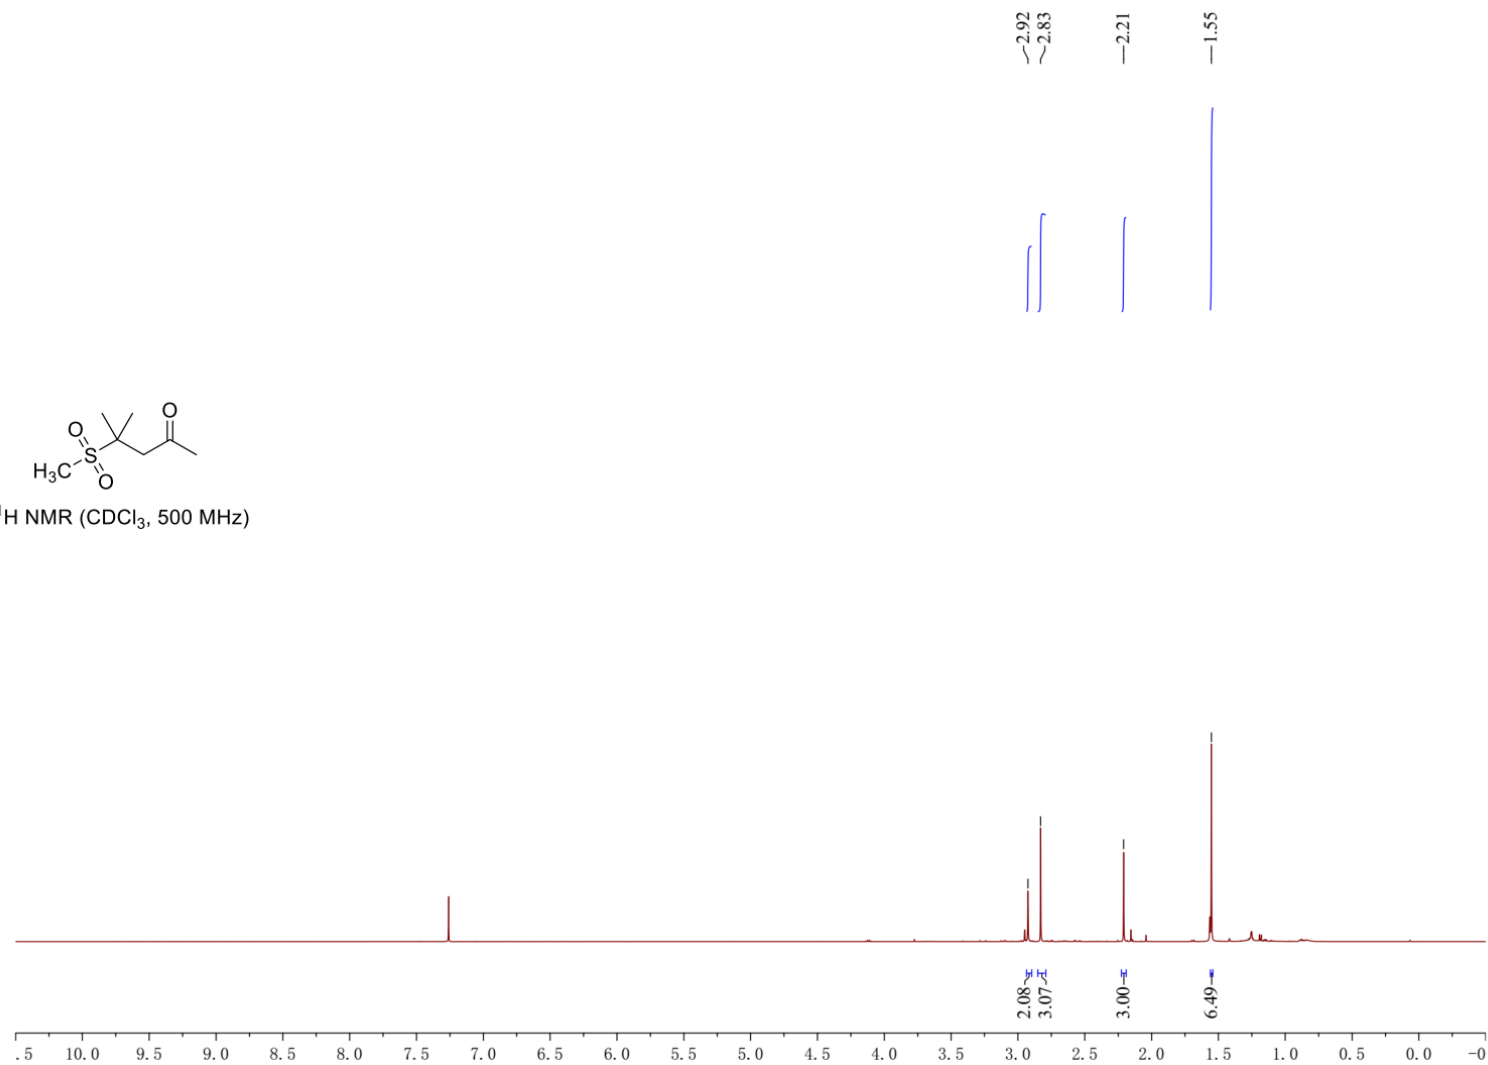

### 4-Methyl-4-(methylsulfonyl)pentan-2-one (33)

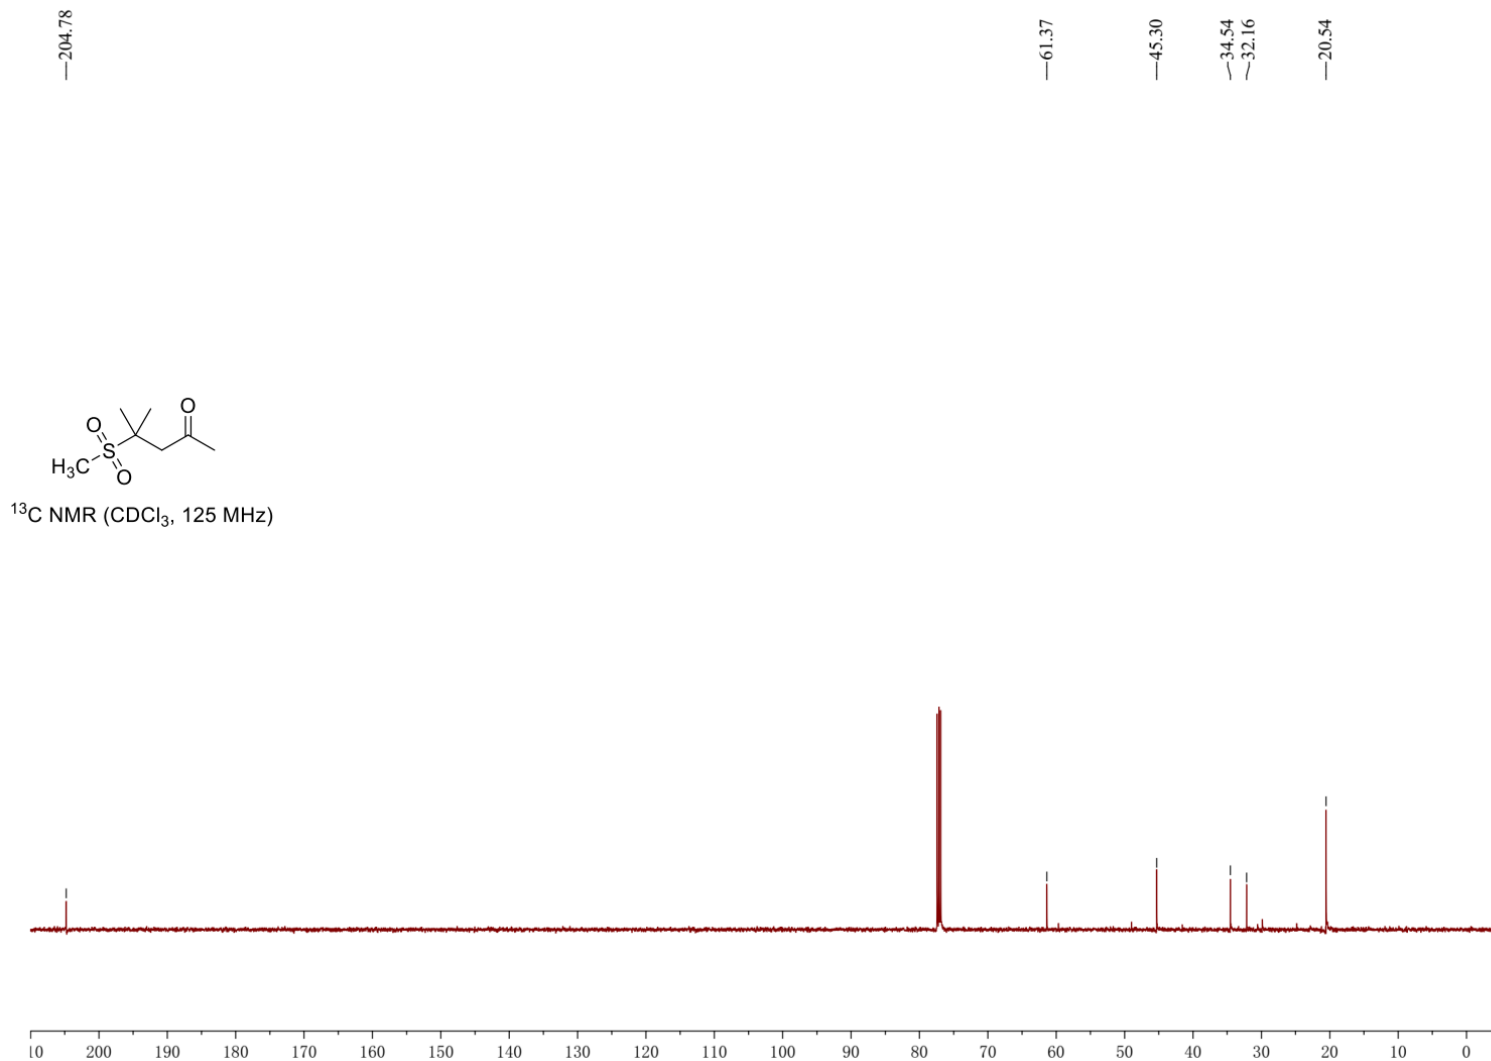

[Go back to table of contents](#)

### 4-Methyl-5-(methylsulfonyl)pentan-2-one (34)

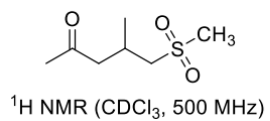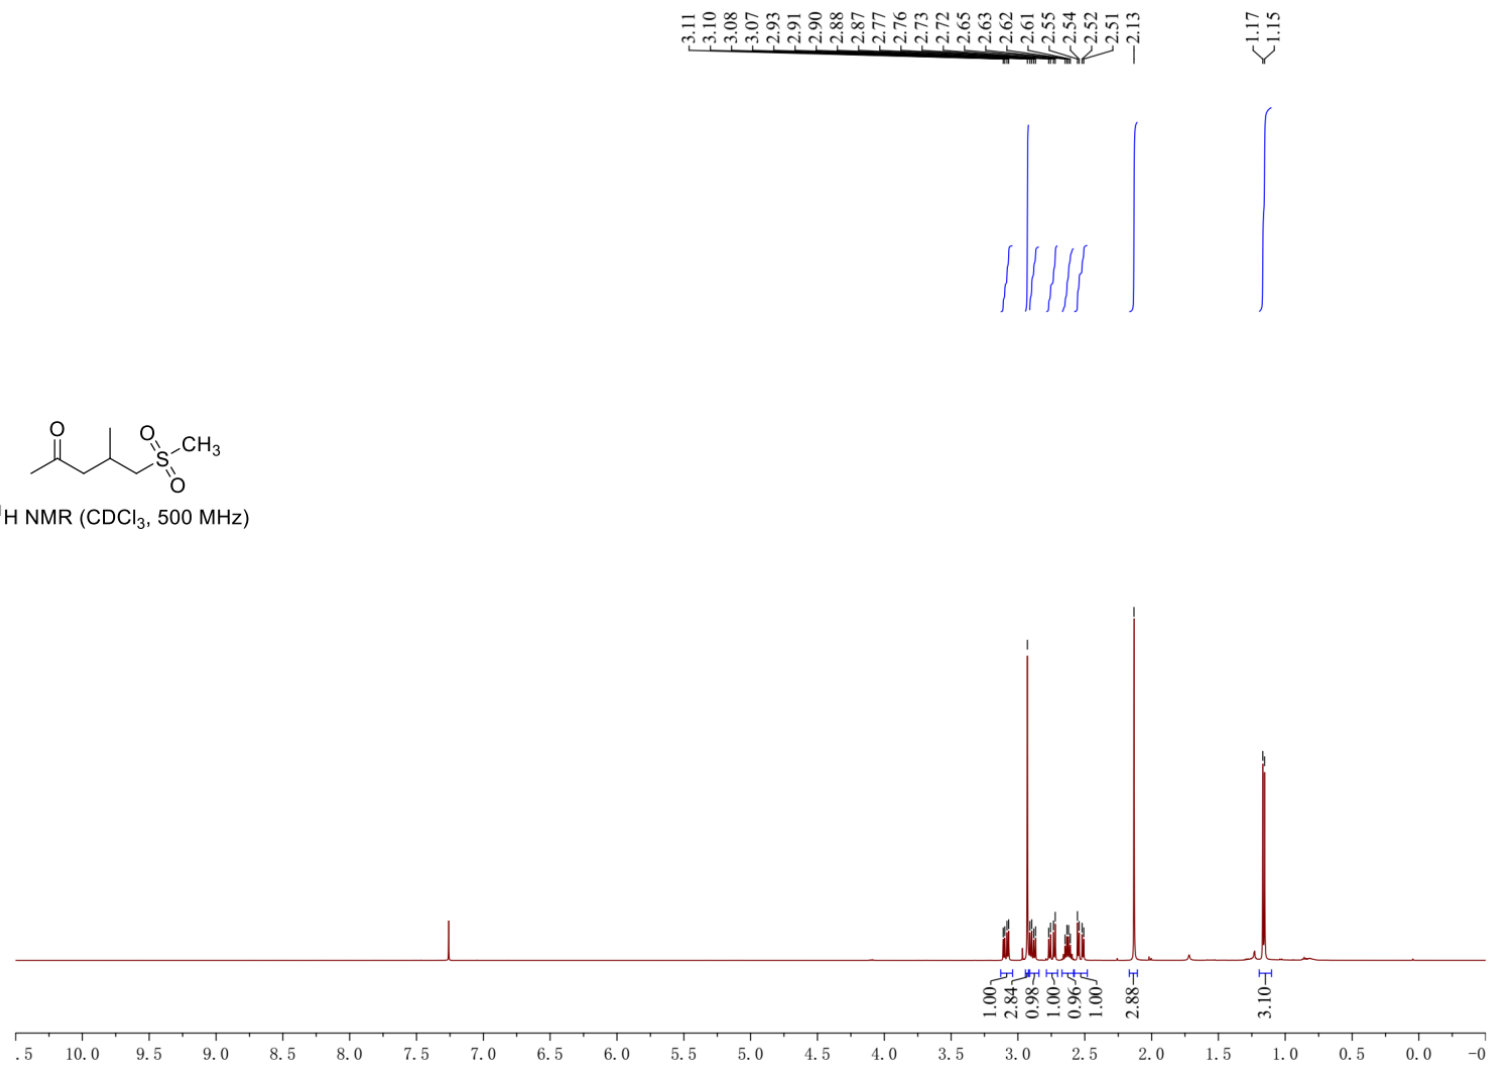

### 4-Methyl-5-(methylsulfonyl)pentan-2-one (34)

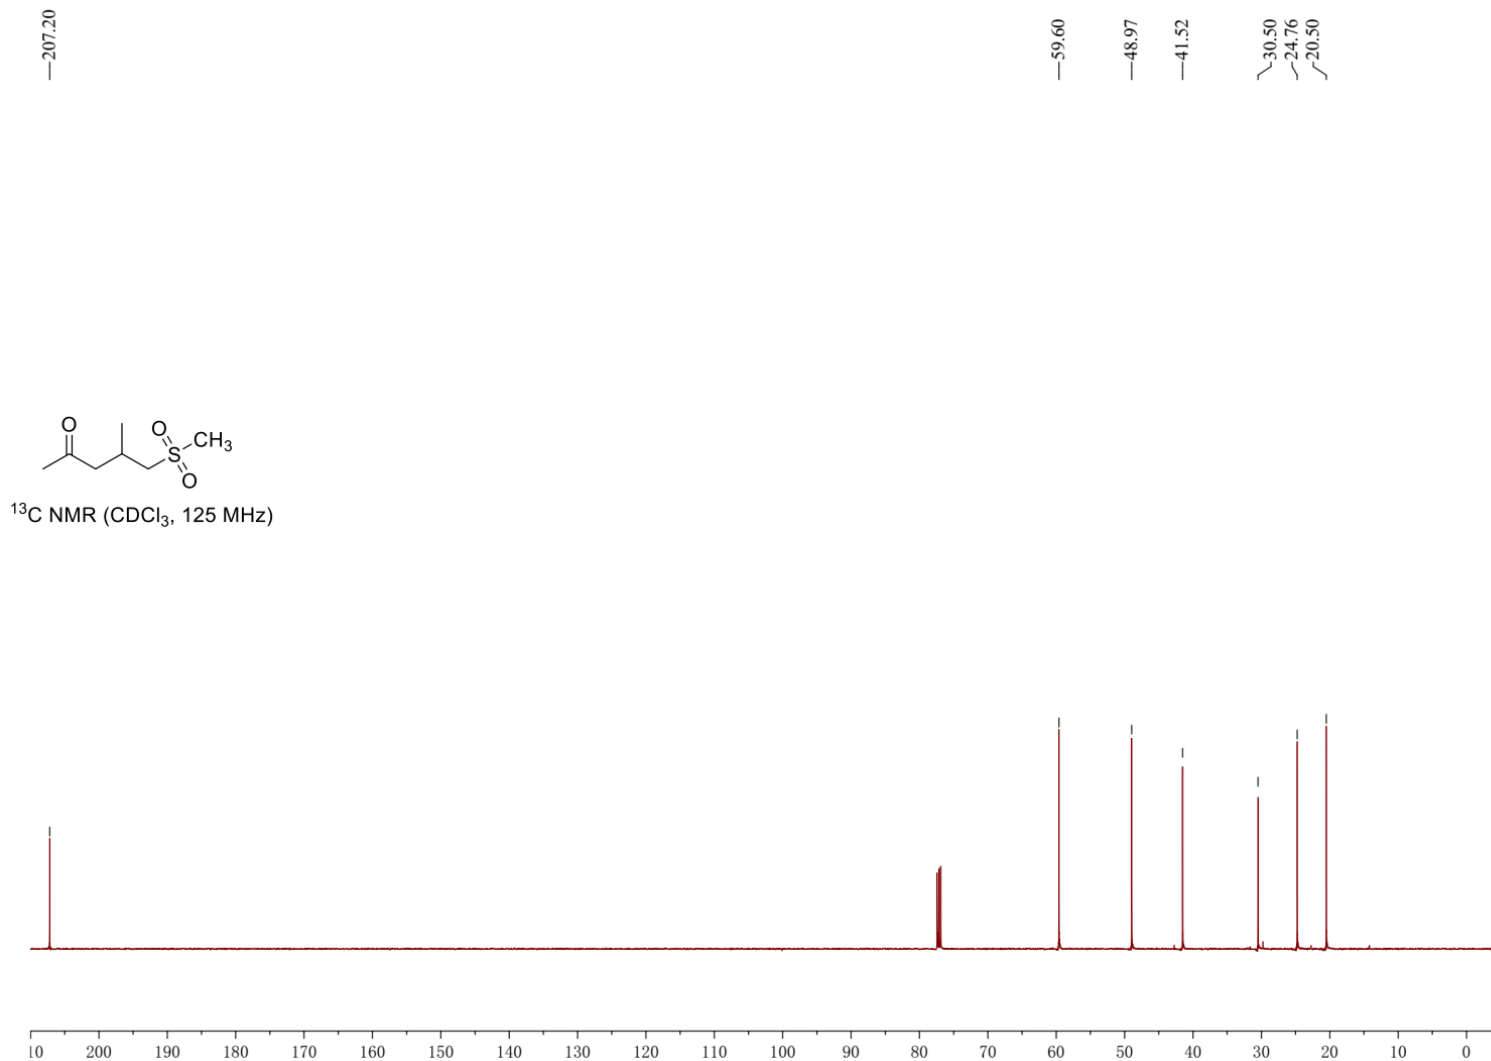

[Go back to table of contents](#)

### 1-(Methylsulfonyl)heptan-4-one (S1)

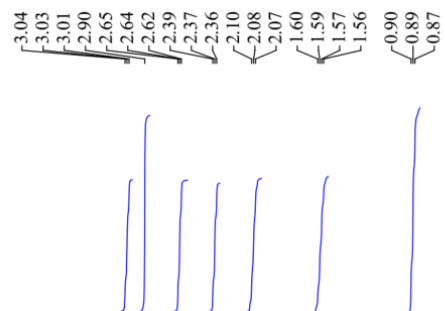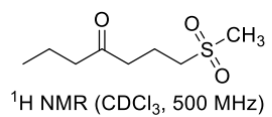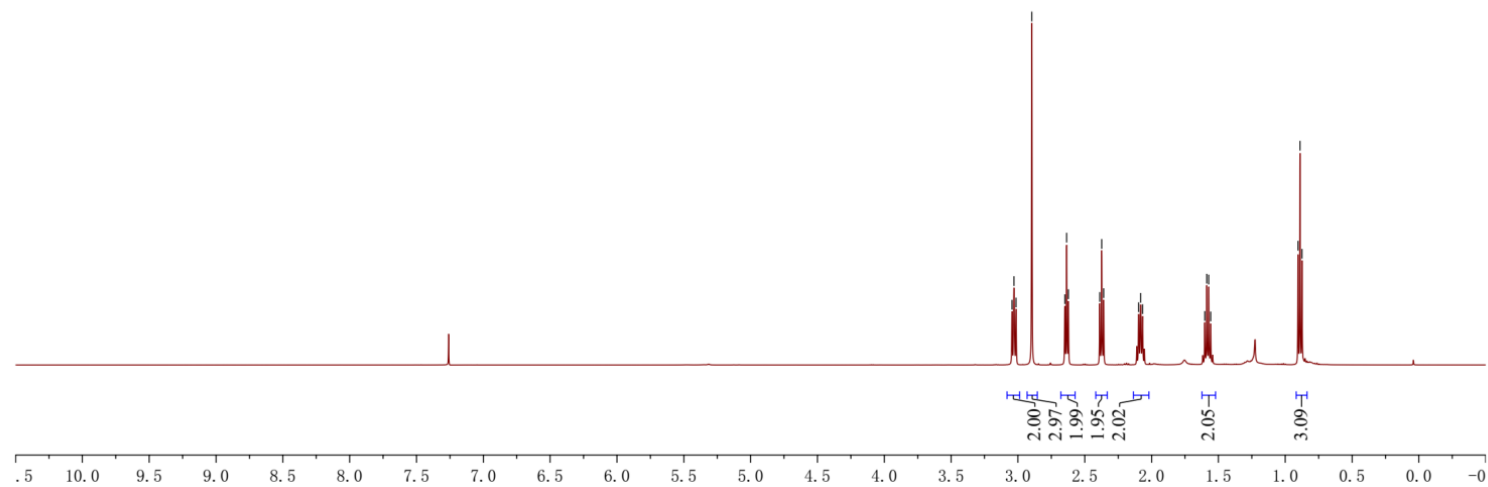

[Go back to table of contents](#)

# 1-(Methylsulfonyl)heptan-4-one (S1)

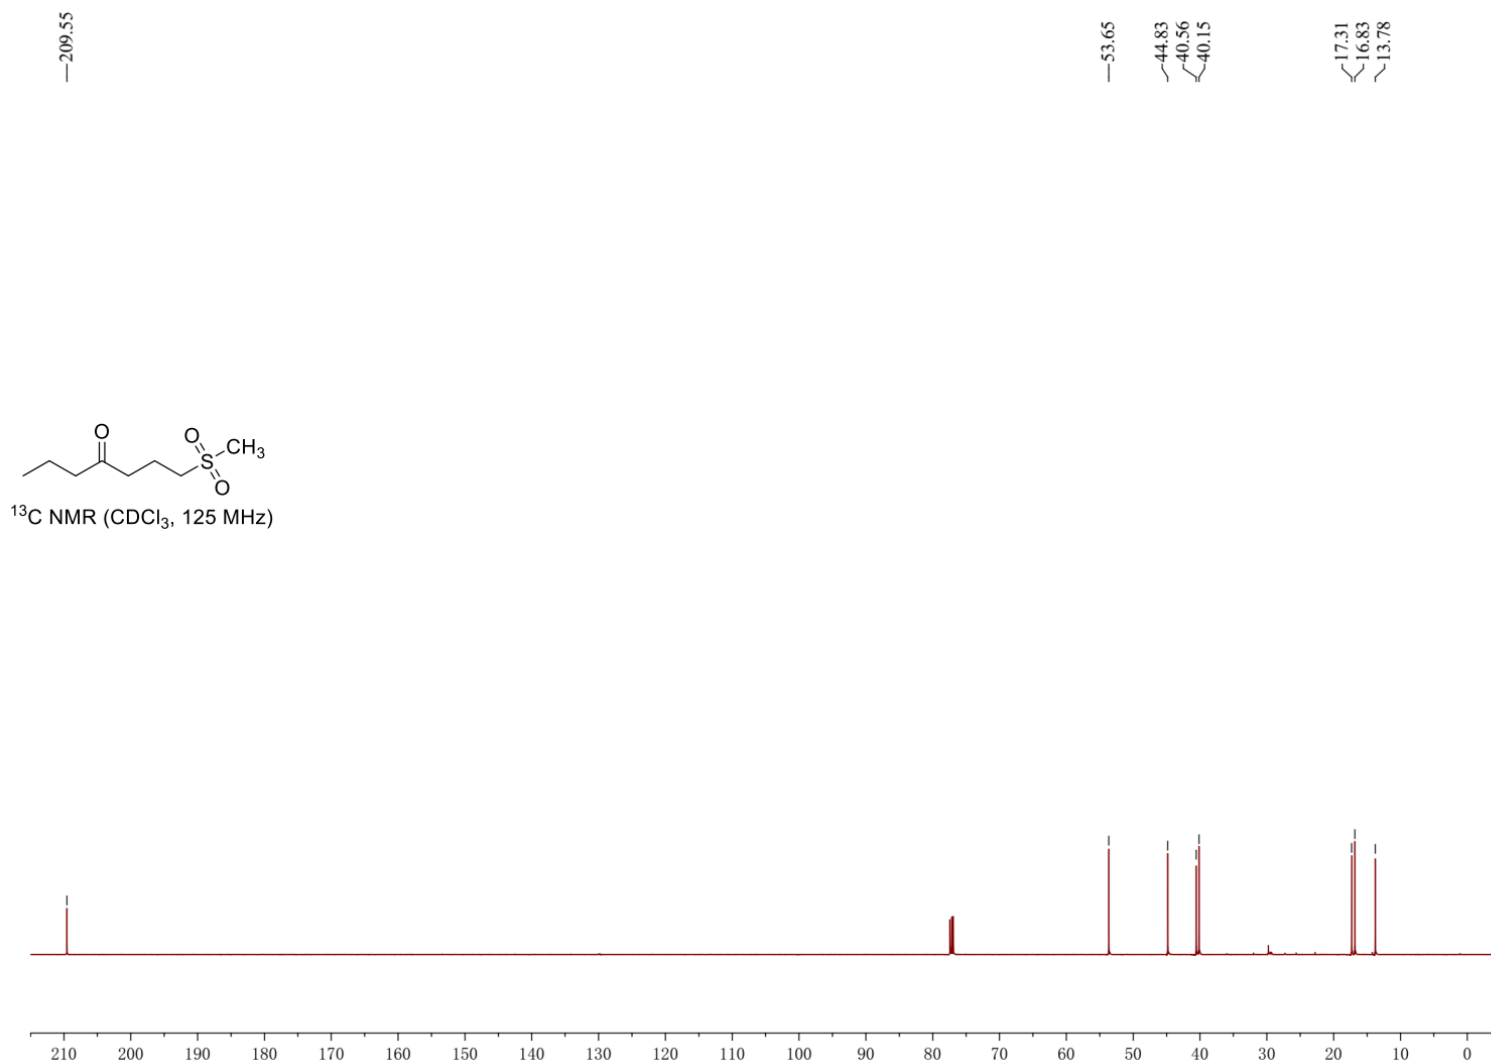

[Go back to table of contents](#)

## 2-(Methylsulfonyl)heptan-4-one (S2)

3.61  
3.60  
3.60  
3.59  
3.58  
3.57  
3.14  
2.84  
2.60  
2.58  
2.56  
2.55  
2.44  
2.42  
1.61  
1.60  
1.58  
1.38  
0.92  
0.90  
0.89

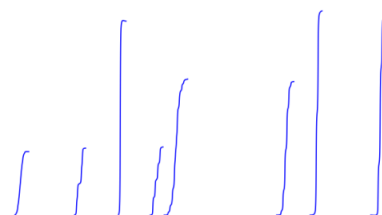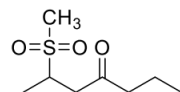

$^1\text{H}$  NMR ( $\text{CDCl}_3$ , 500 MHz)

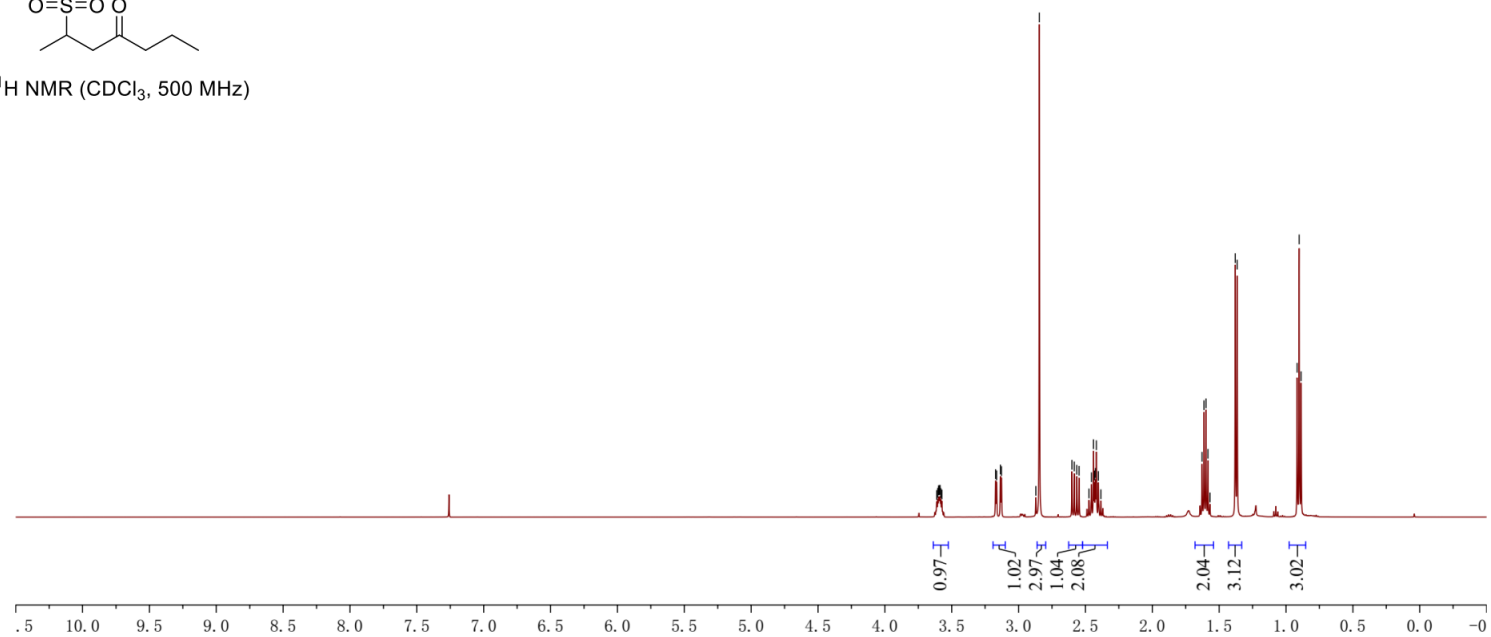

[Go back to table of contents](#)



## 2-(Methylsulfonyl)heptan-4-one (S2)

—206.57

—54.37

—45.24

—41.38

—38.35

—17.25

—14.62

—13.70

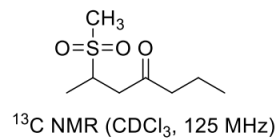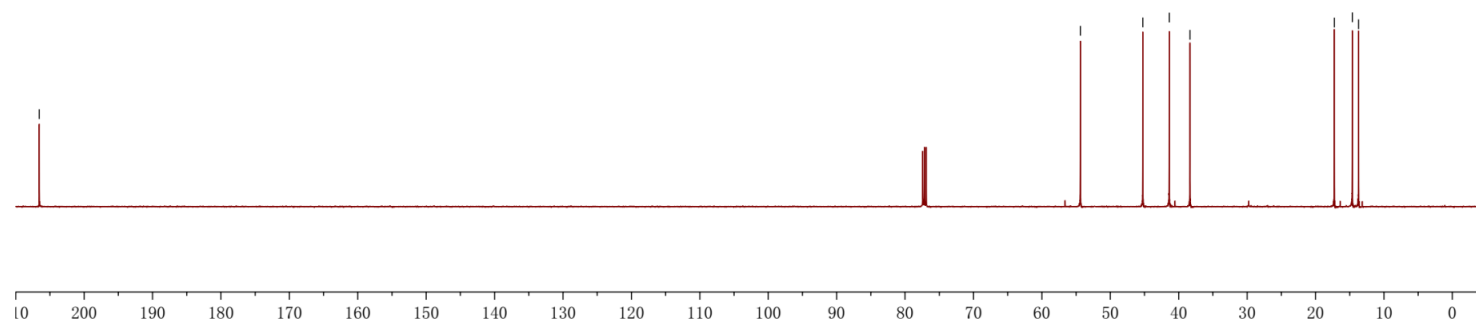

[Go back to table of contents](#)

### Methyl (1*R*\*,2*R*\*)-2-(allylsulfonyl)cyclopentane-1-carboxylate (S3)

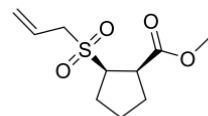

<sup>1</sup>H NMR (CDCl<sub>3</sub>, 500 MHz)

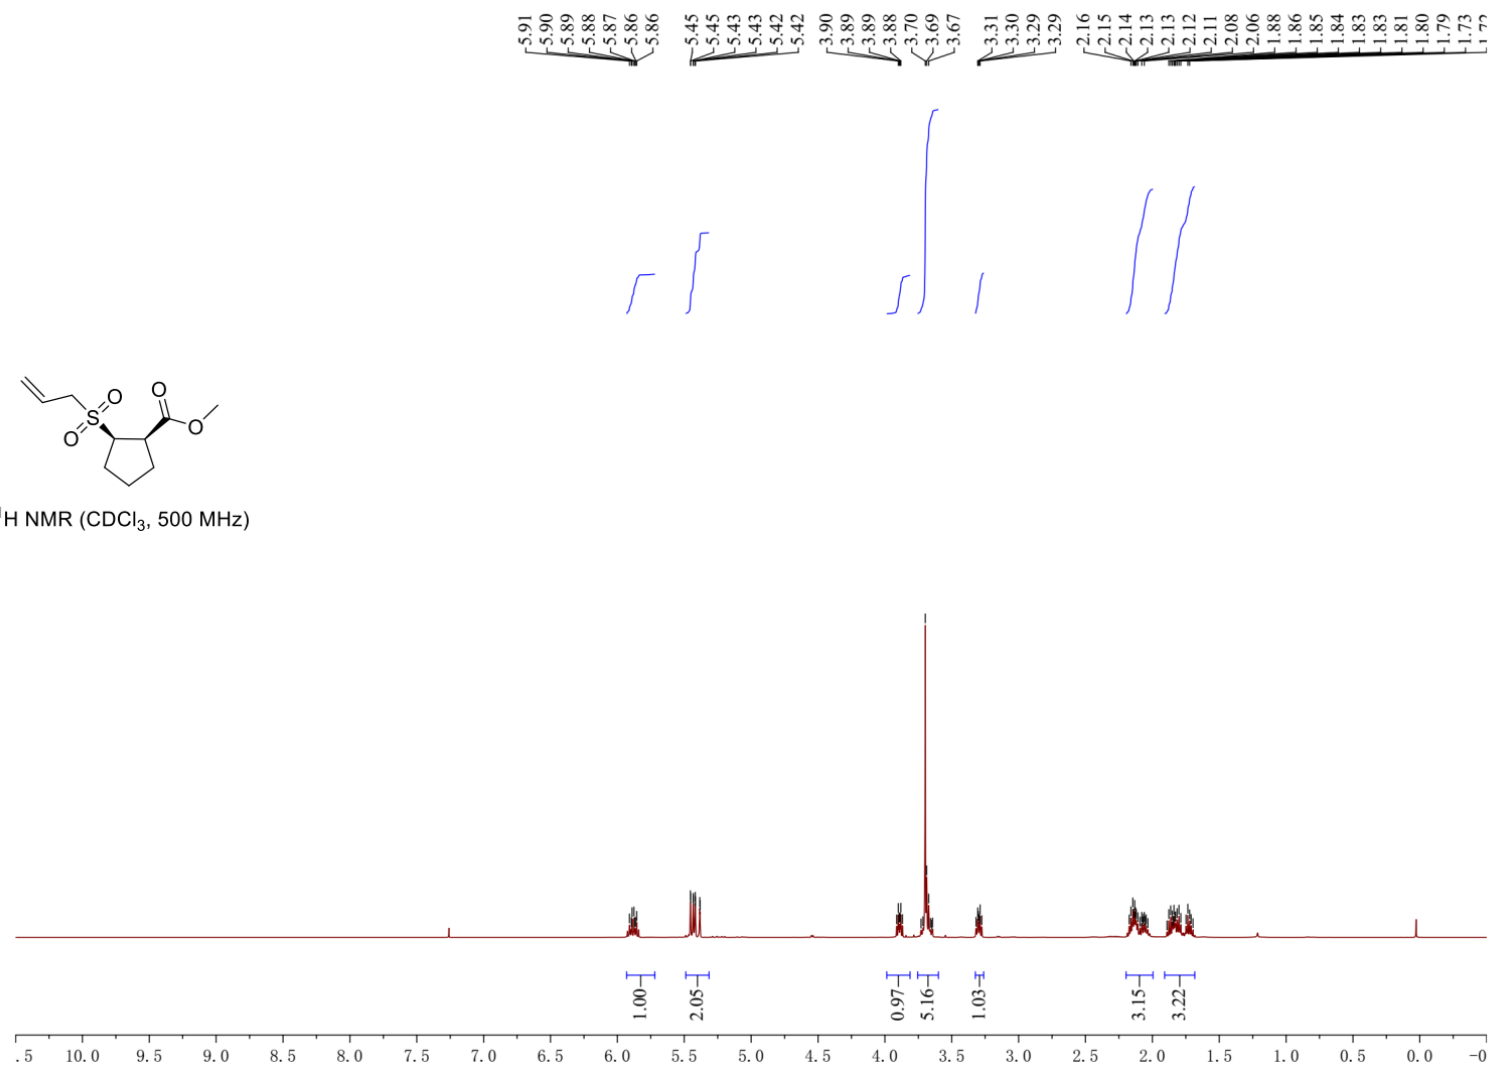

[Go back to table of contents](#)

### Methyl (1*R*\*,2*R*\*)-2-(allylsulfonyl)cyclopentane-1-carboxylate (S3)

—174.15

—124.69  
—124.64

—62.14  
—56.96  
—52.52

—44.72

—31.77  
—27.39  
—25.93

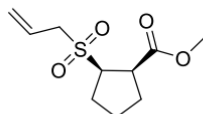

<sup>13</sup>C NMR (CDCl<sub>3</sub>, 125 MHz)

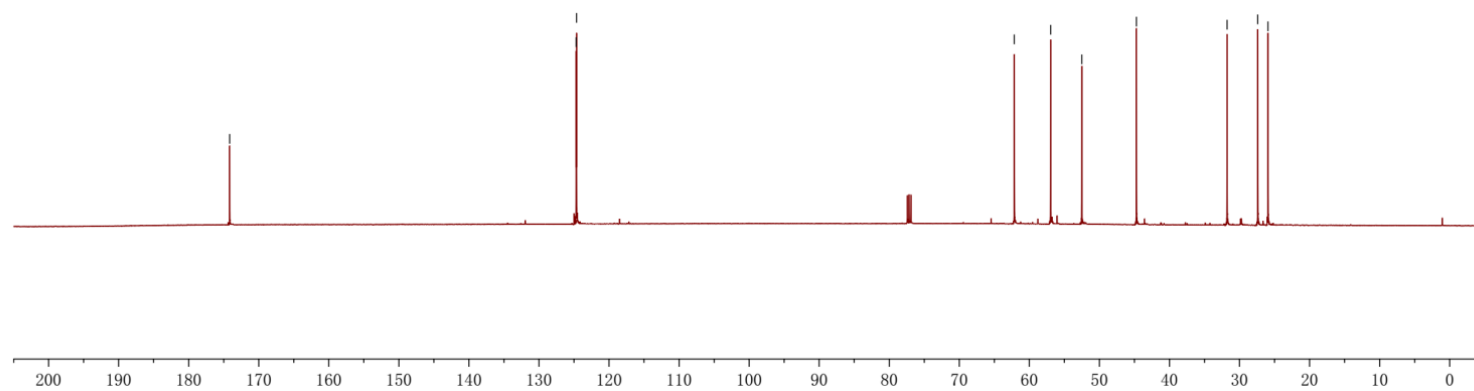

[Go back to table of contents](#)

### Methyl (1*S*\*,3*S*\*)-3-(allylsulfonyl)cyclopentane-1-carboxylate (S4)

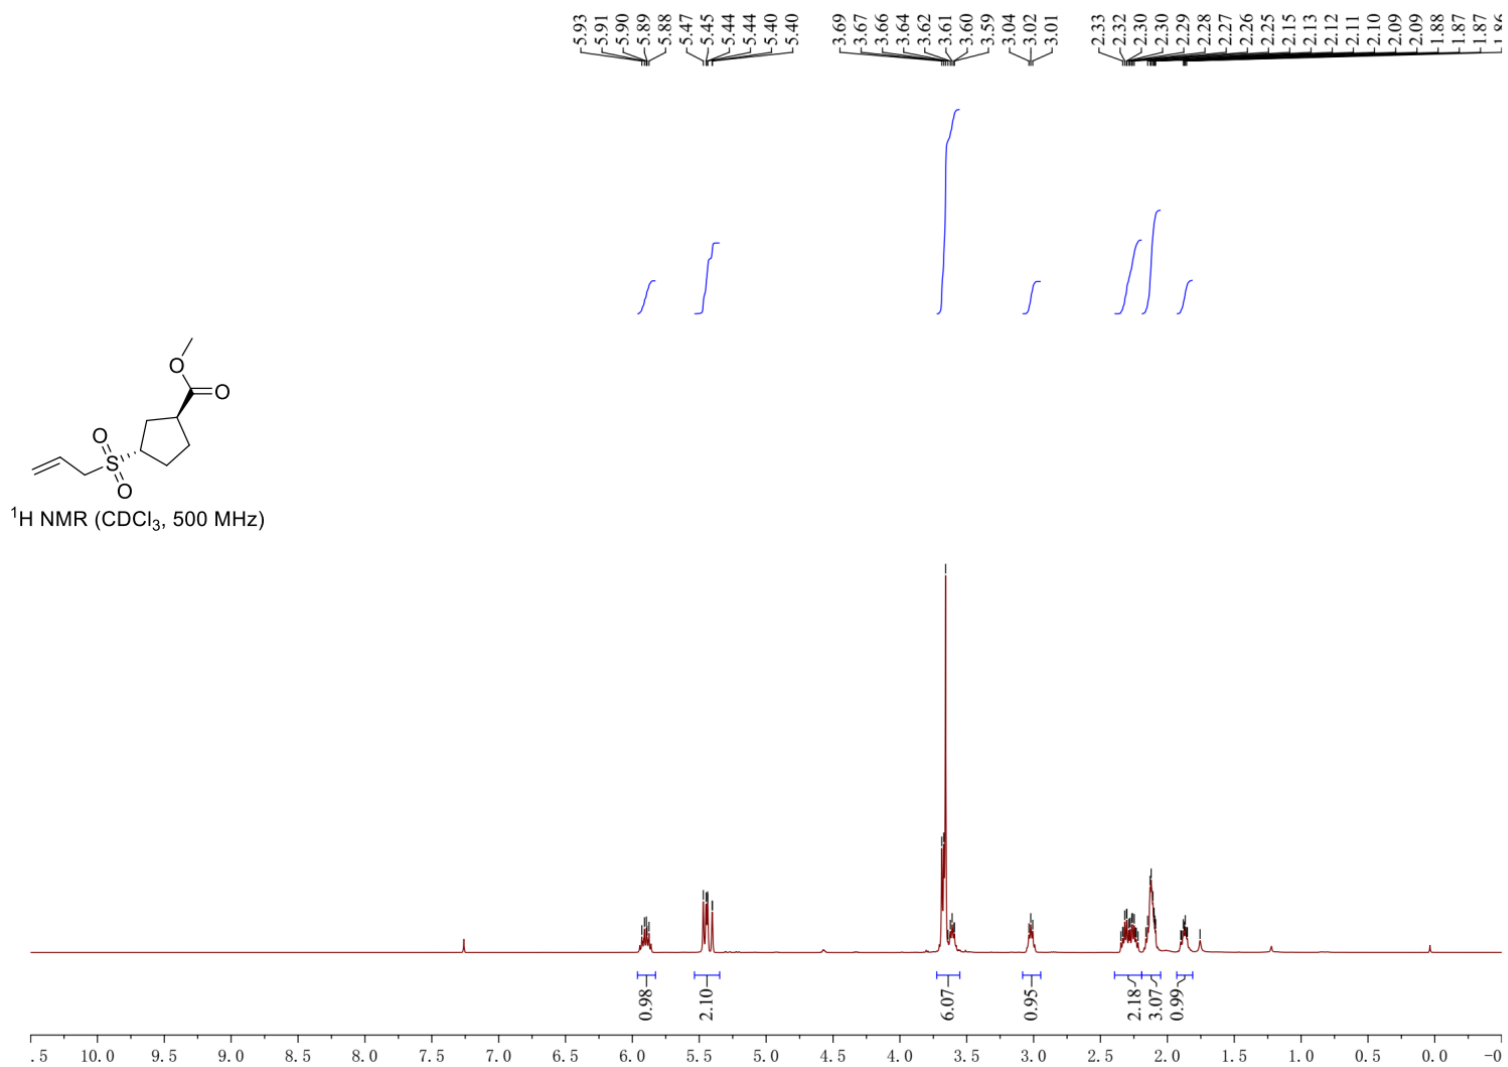

### Methyl (1*S*\*,3*S*\*)-3-(allylsulfonyl)cyclopentane-1-carboxylate (S4)

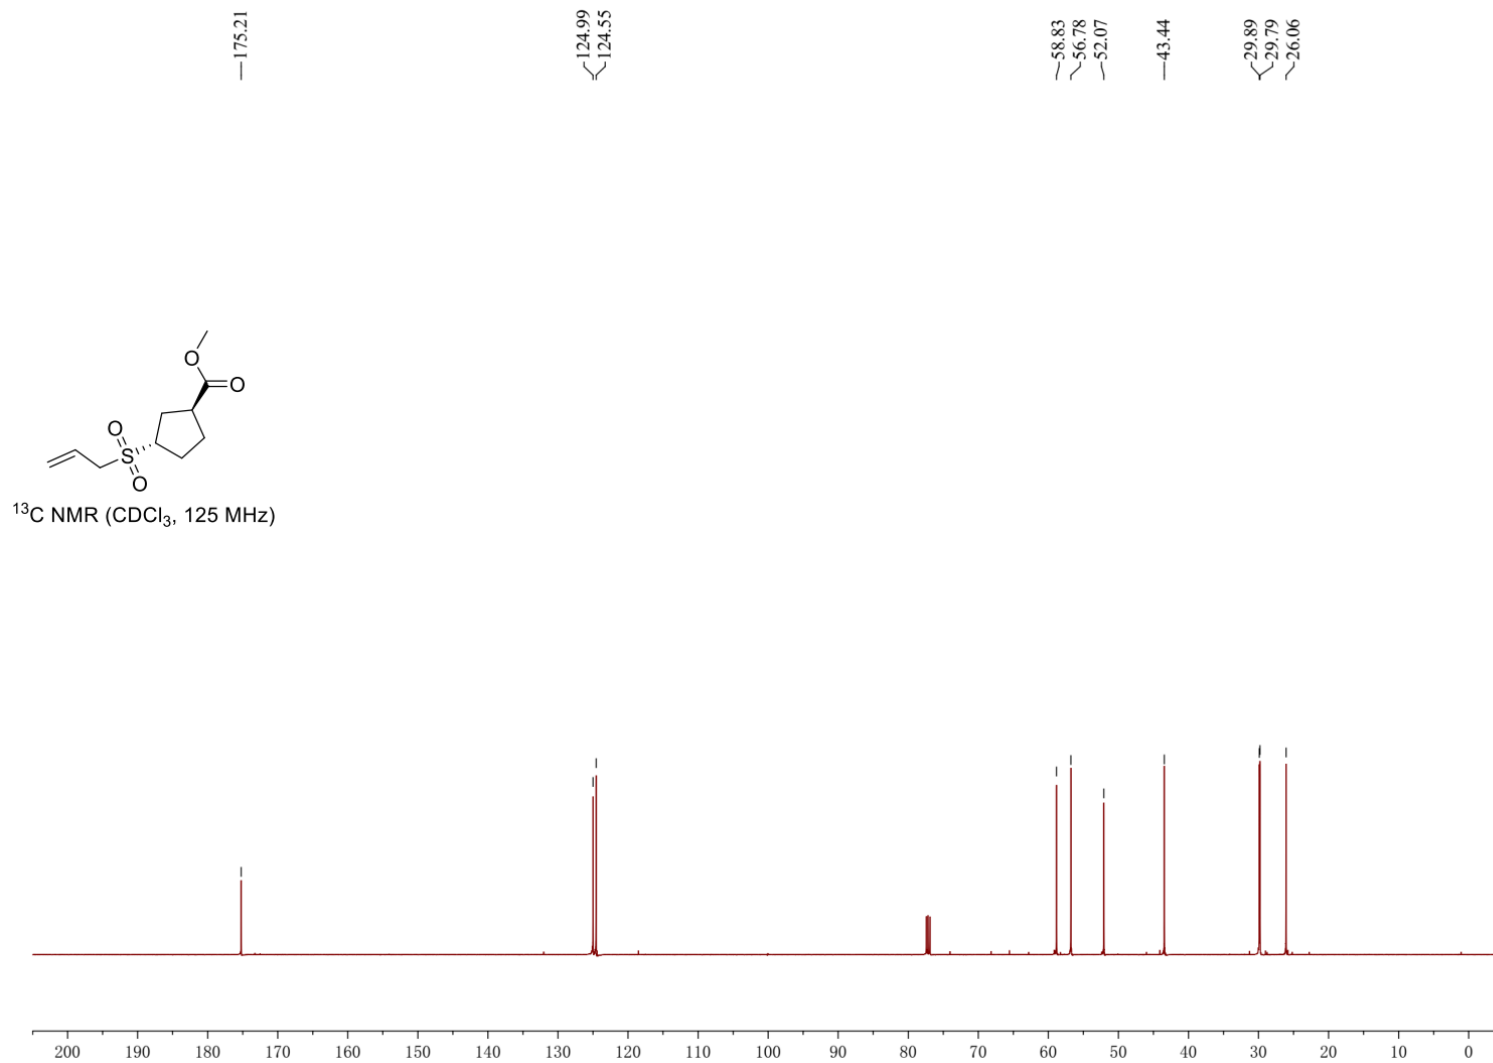

[Go back to table of contents](#)

# Methyl (1*S*\*,3*R*\*)-3-(allylsulfonyl)cyclopentane-1-carboxylate (S5)

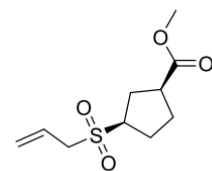

<sup>1</sup>H NMR (CDCl<sub>3</sub>, 500 MHz)

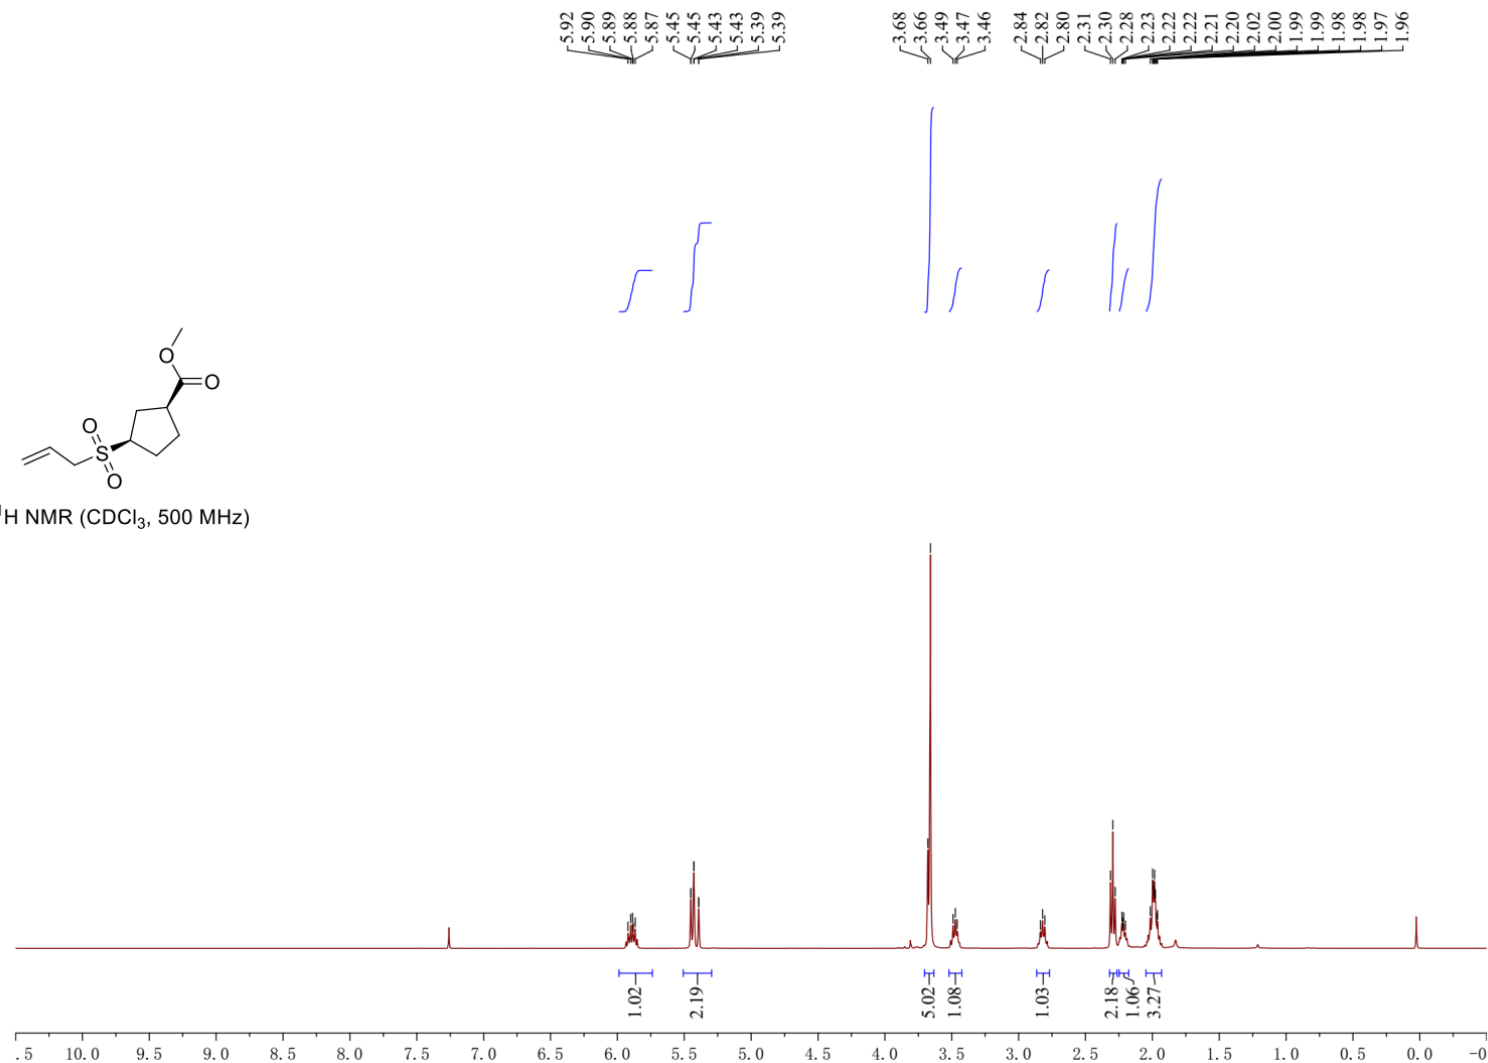

[Go back to table of contents](#)

### Methyl (1*S*\*,3*R*\*)-3-(allylsulfonyl)cyclopentane-1-carboxylate (S5)

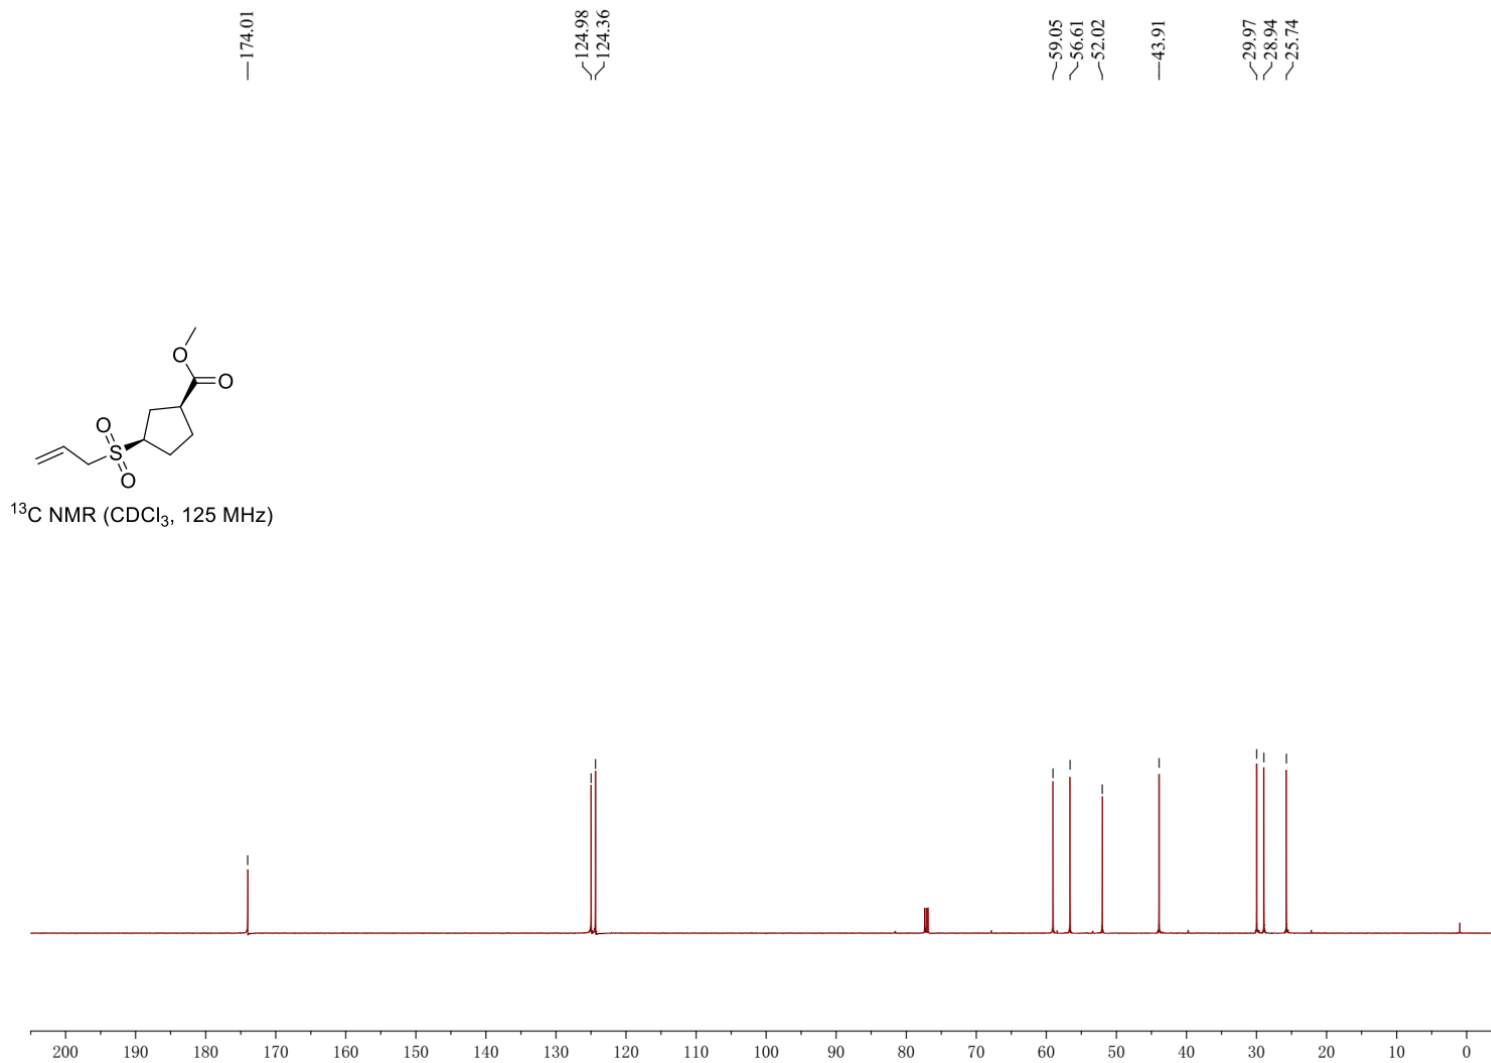

[Go back to table of contents](#)

# Cycloheptanesulfinic acid (37)

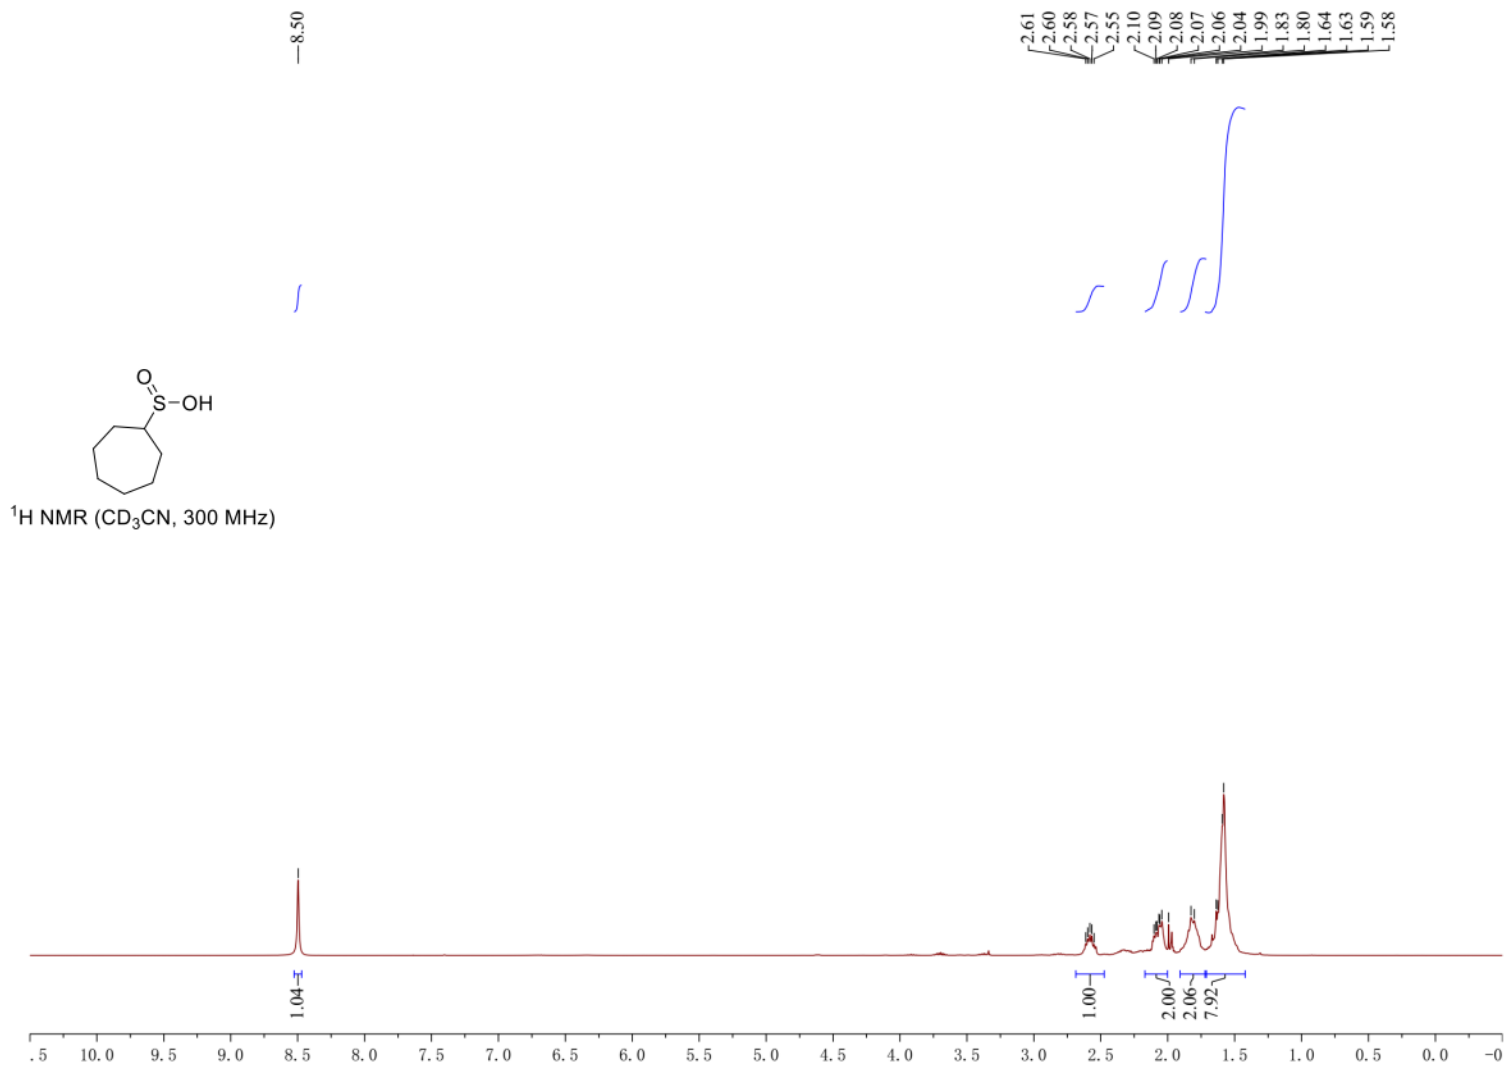

[Go back to table of contents](#)



# Cycloheptanesulfinic acid (37)

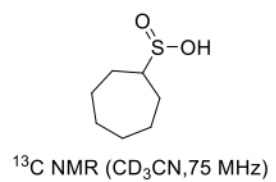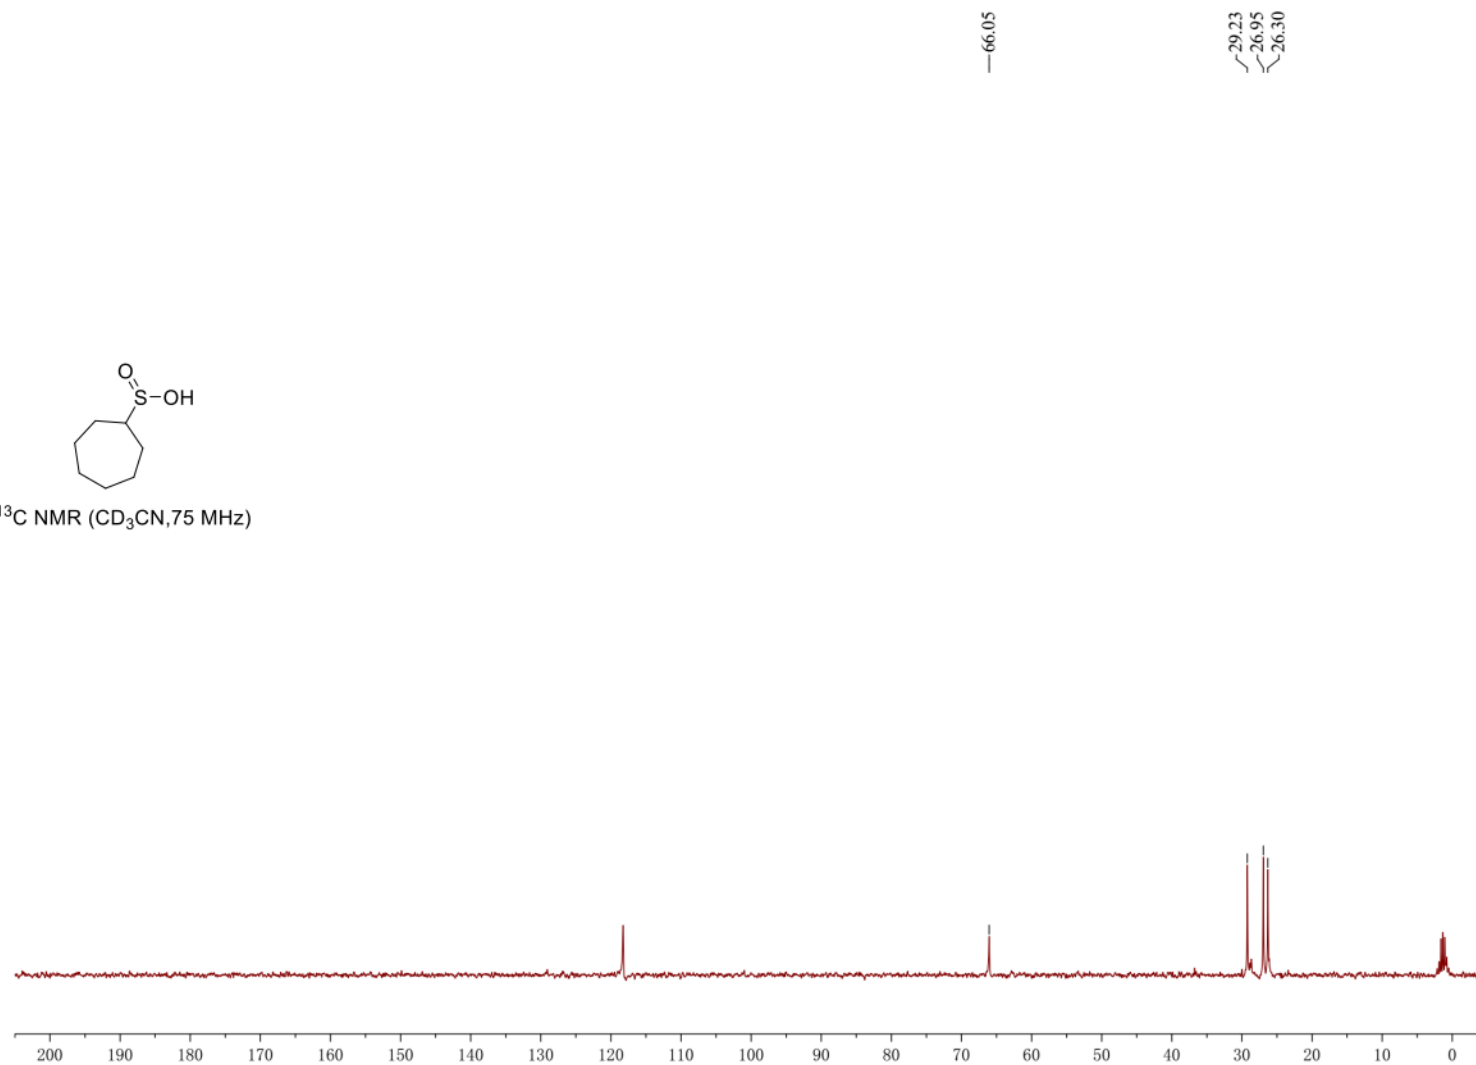

[Go back to table of contents](#)

# Sodium cycloheptanesulfinate (38)

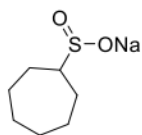

$^1\text{H NMR}$  ( $\text{CD}_3\text{OD}$ , 300 MHz)

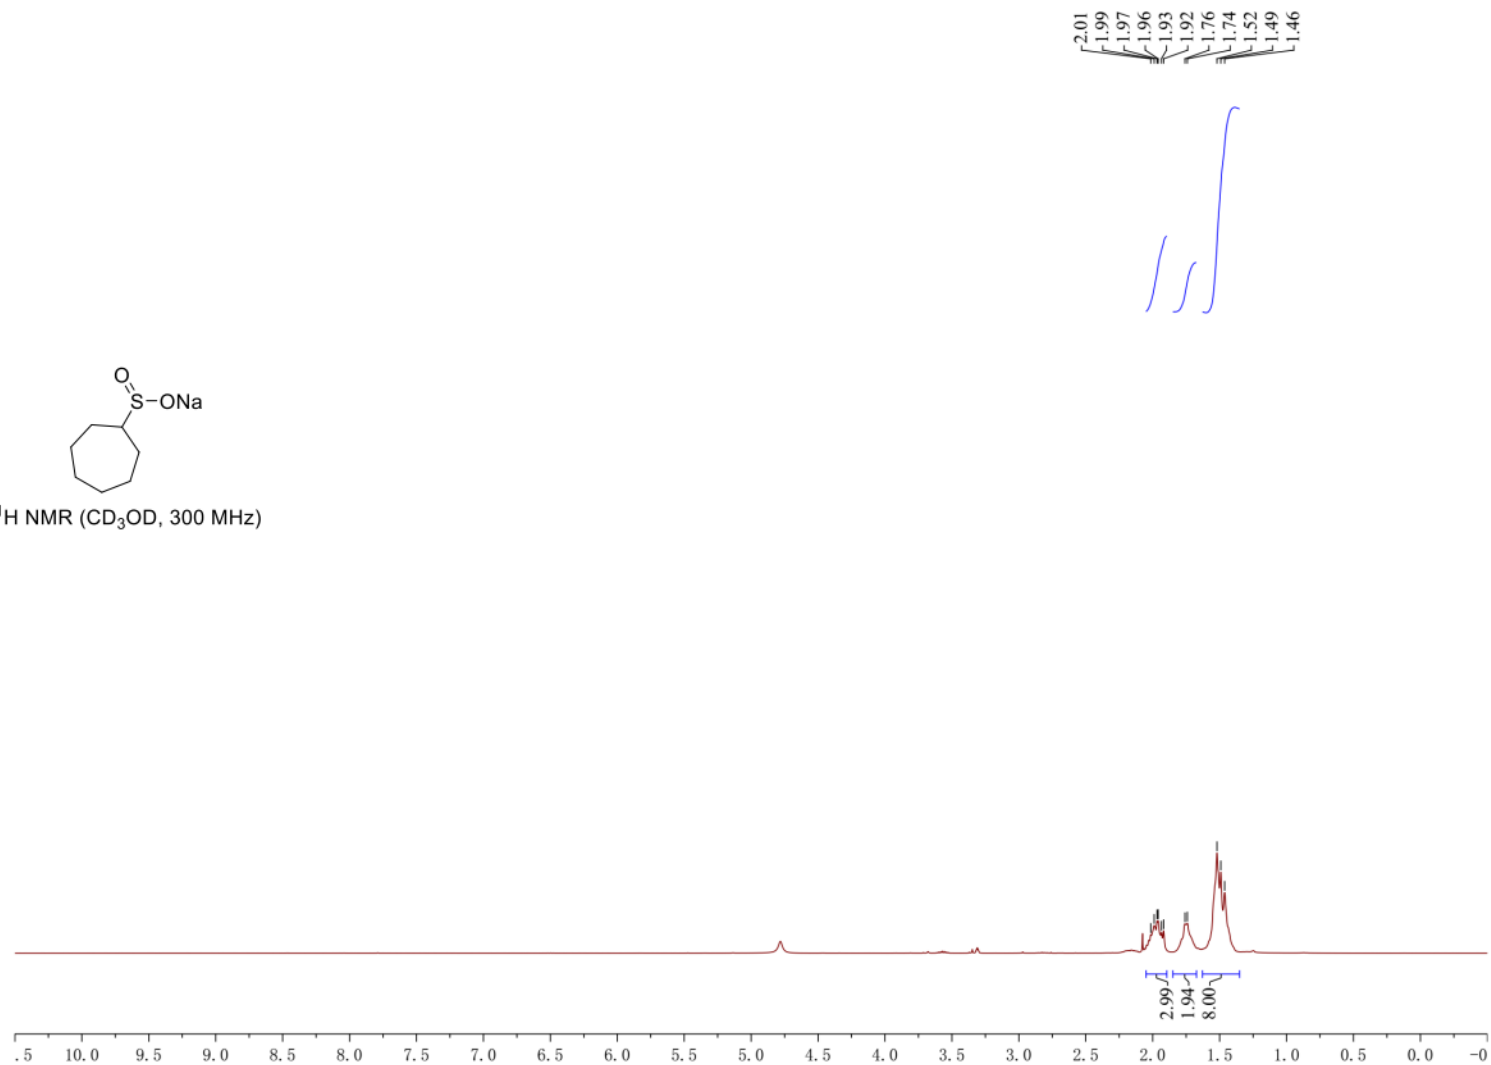

[Go back to table of contents](#)

# Sodium cycloheptanesulfinate (38)

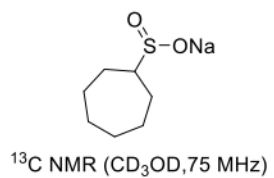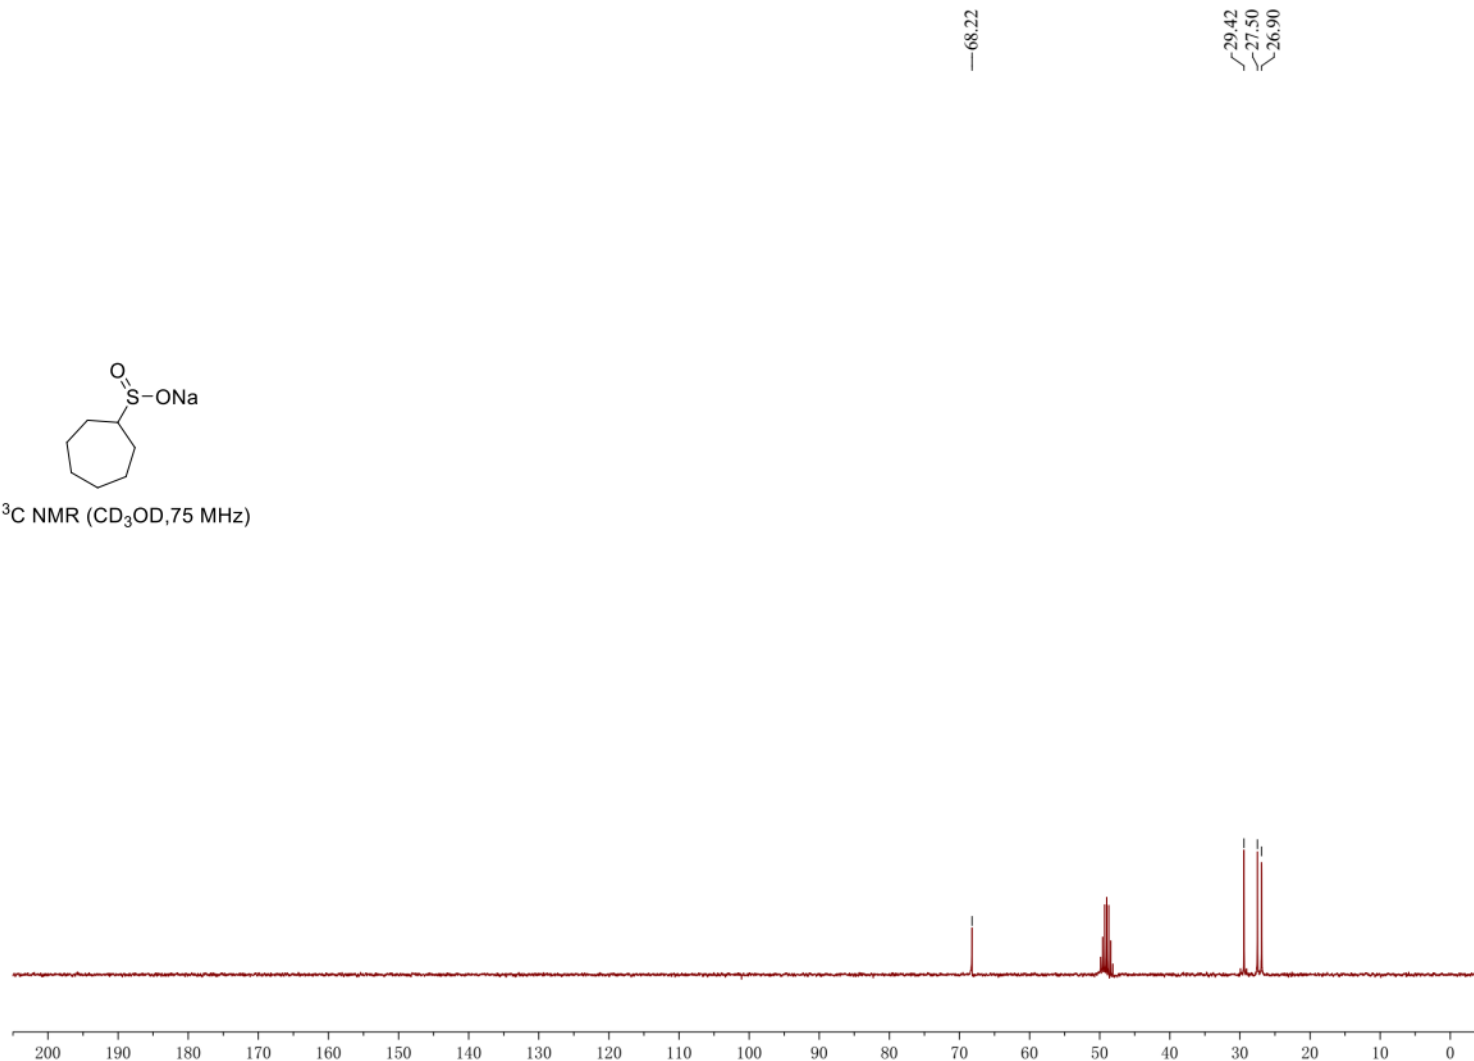

### 4-(Cyclohexylsulfonyl)morpholine (39)

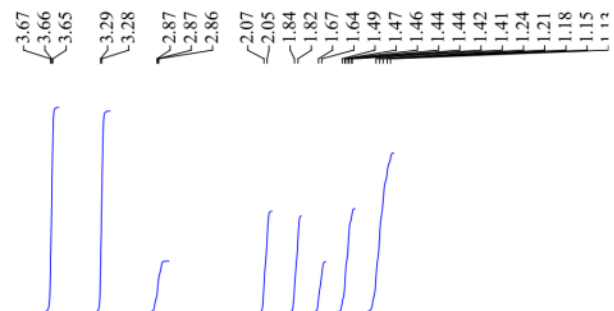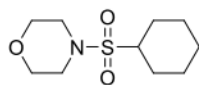

<sup>1</sup>H NMR (CDCl<sub>3</sub>, 500 MHz)

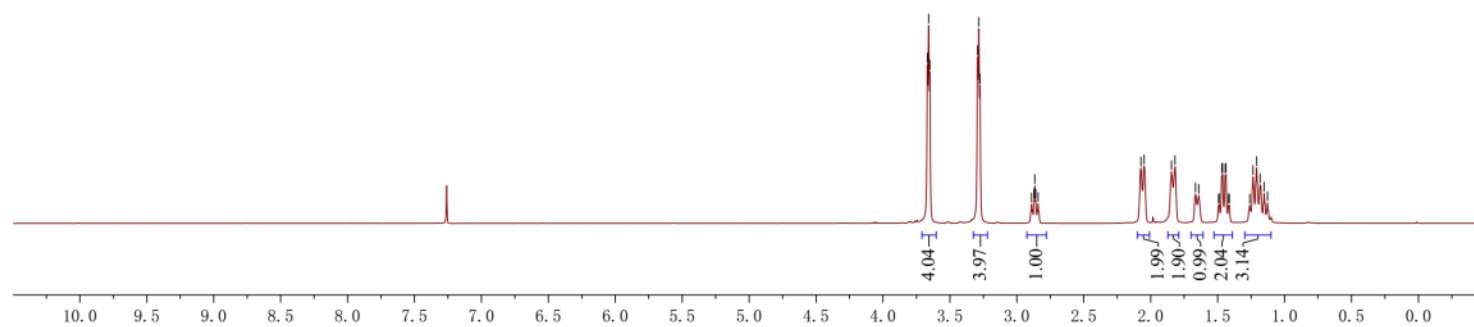

### 4-(Cyclohexylsulfonyl)morpholine (39)

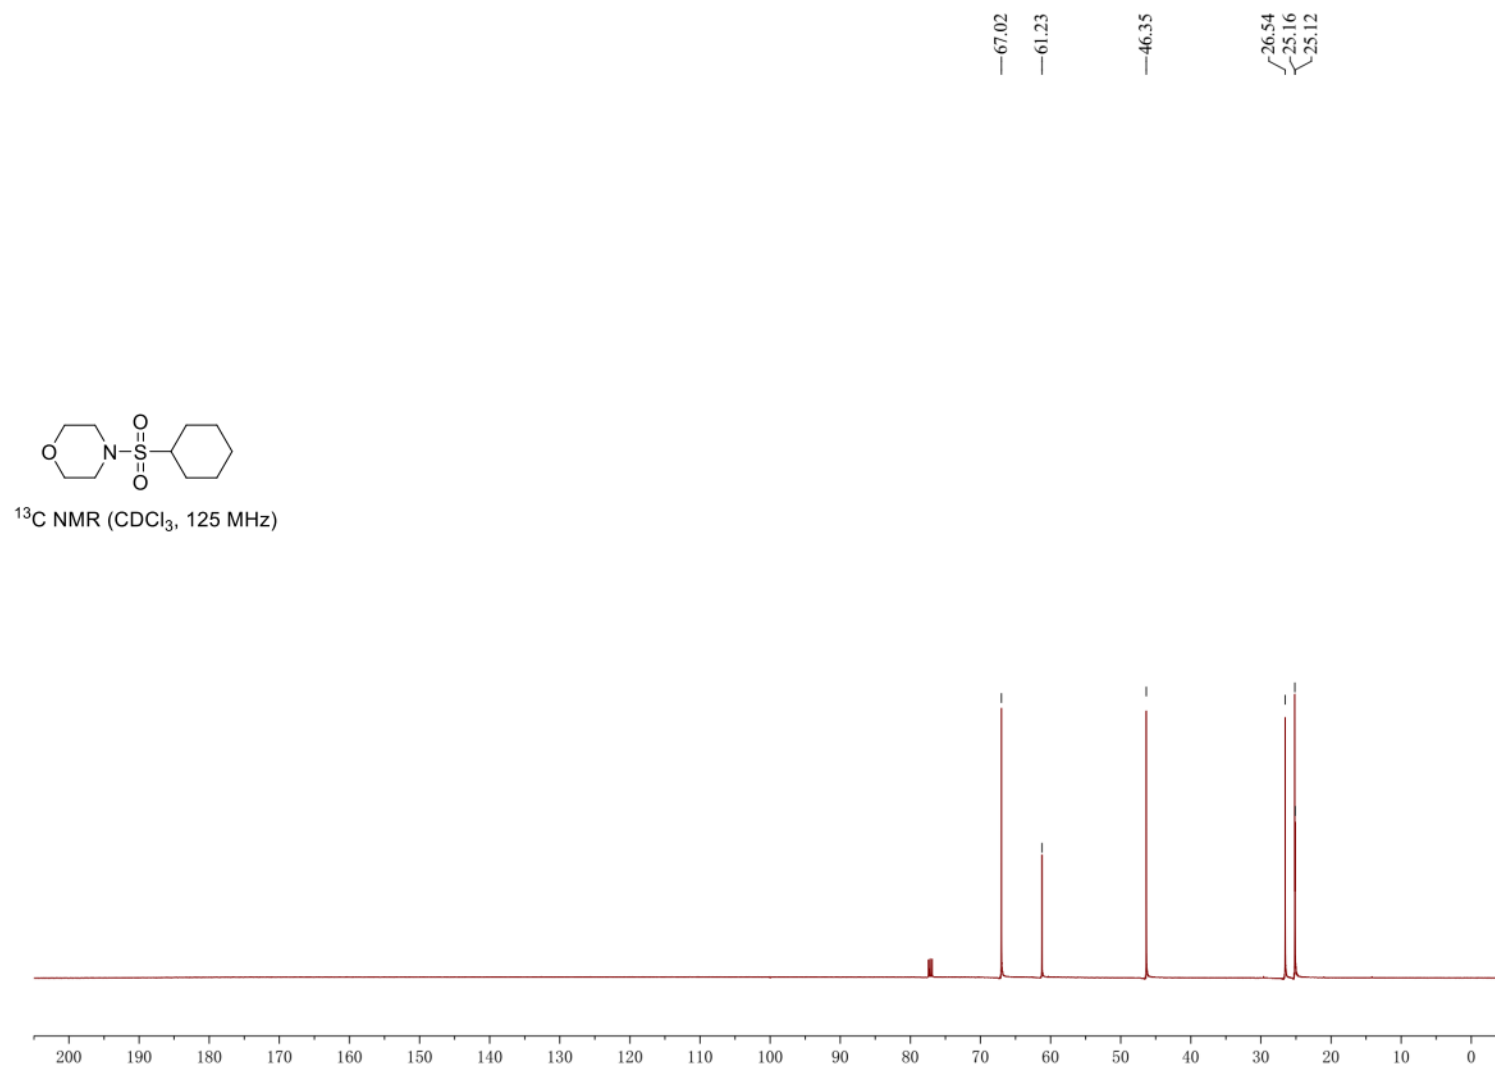

[Go back to table of contents](#)

## 2-(Cyclopentylsulfonyl)-1,2,3,4-tetrahydroisoquinoline (40)

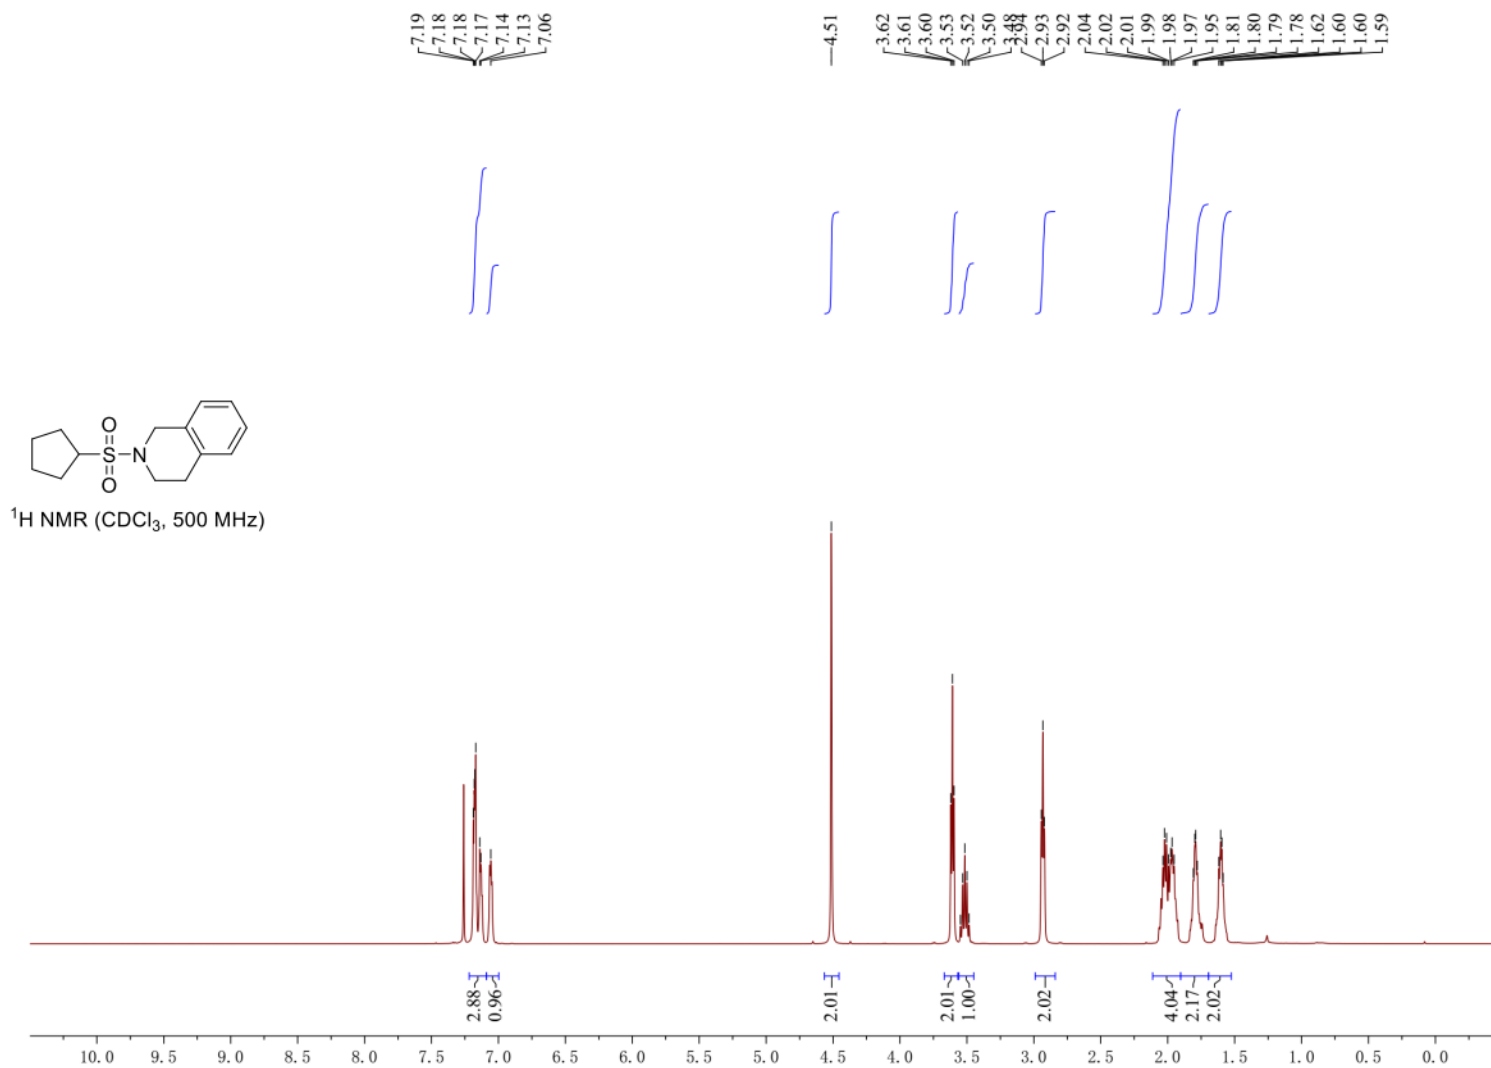

## 2-(Cyclopentylsulfonyl)-1,2,3,4-tetrahydroisoquinoline (40)

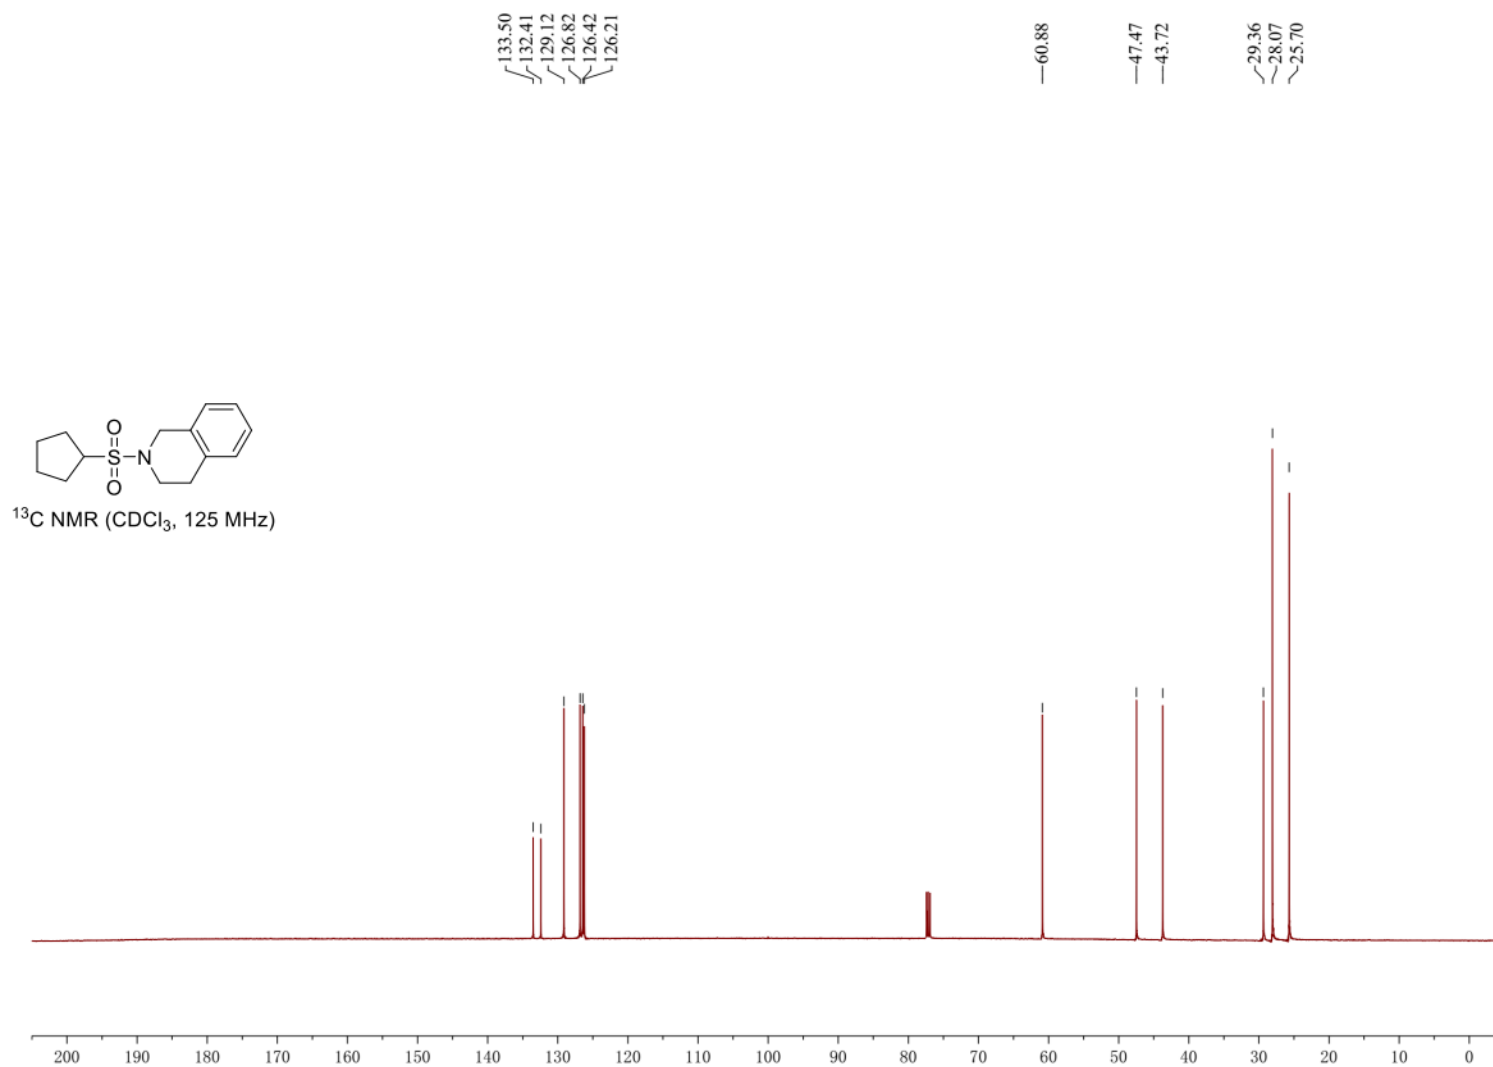

[Go back to table of contents](#)

**(R)-N-(1-(4-Methoxyphenyl)ethyl)cyclopentanesulfonamide (41)**

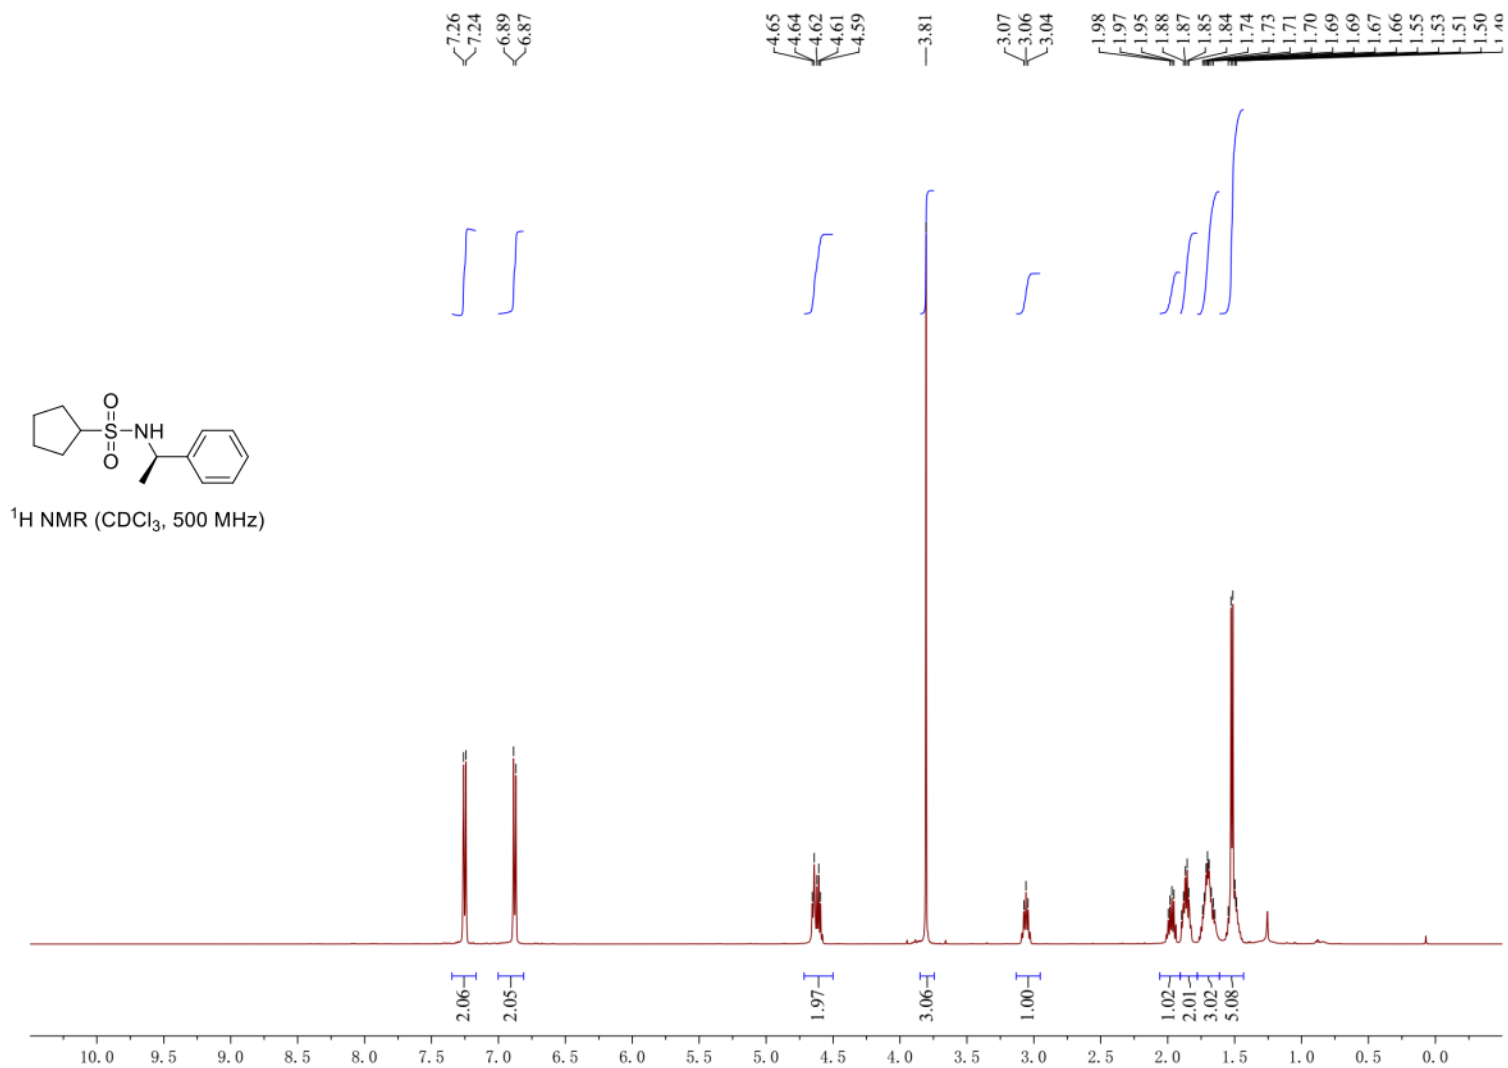



**(R)-N-(1-(4-Methoxyphenyl)ethyl)cyclopentanesulfonamide (41)**

—159.18                      —135.28      —127.48                      —114.20                                              —62.42      —55.43      —53.27                                              28.43      27.83      26.17      25.91      24.61

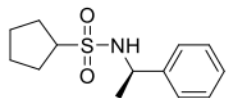

<sup>13</sup>C NMR (CDCl<sub>3</sub>, 125 MHz)

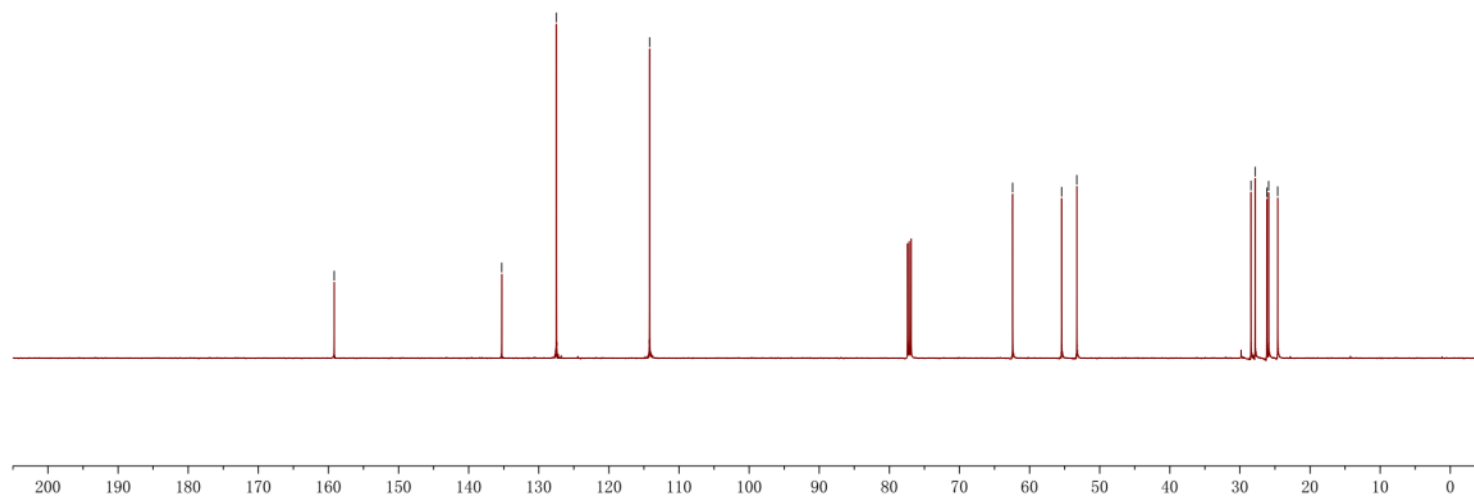

## 2,6-Dimethyl-1-(morpholinosulfonyl)heptan-4-one (42)

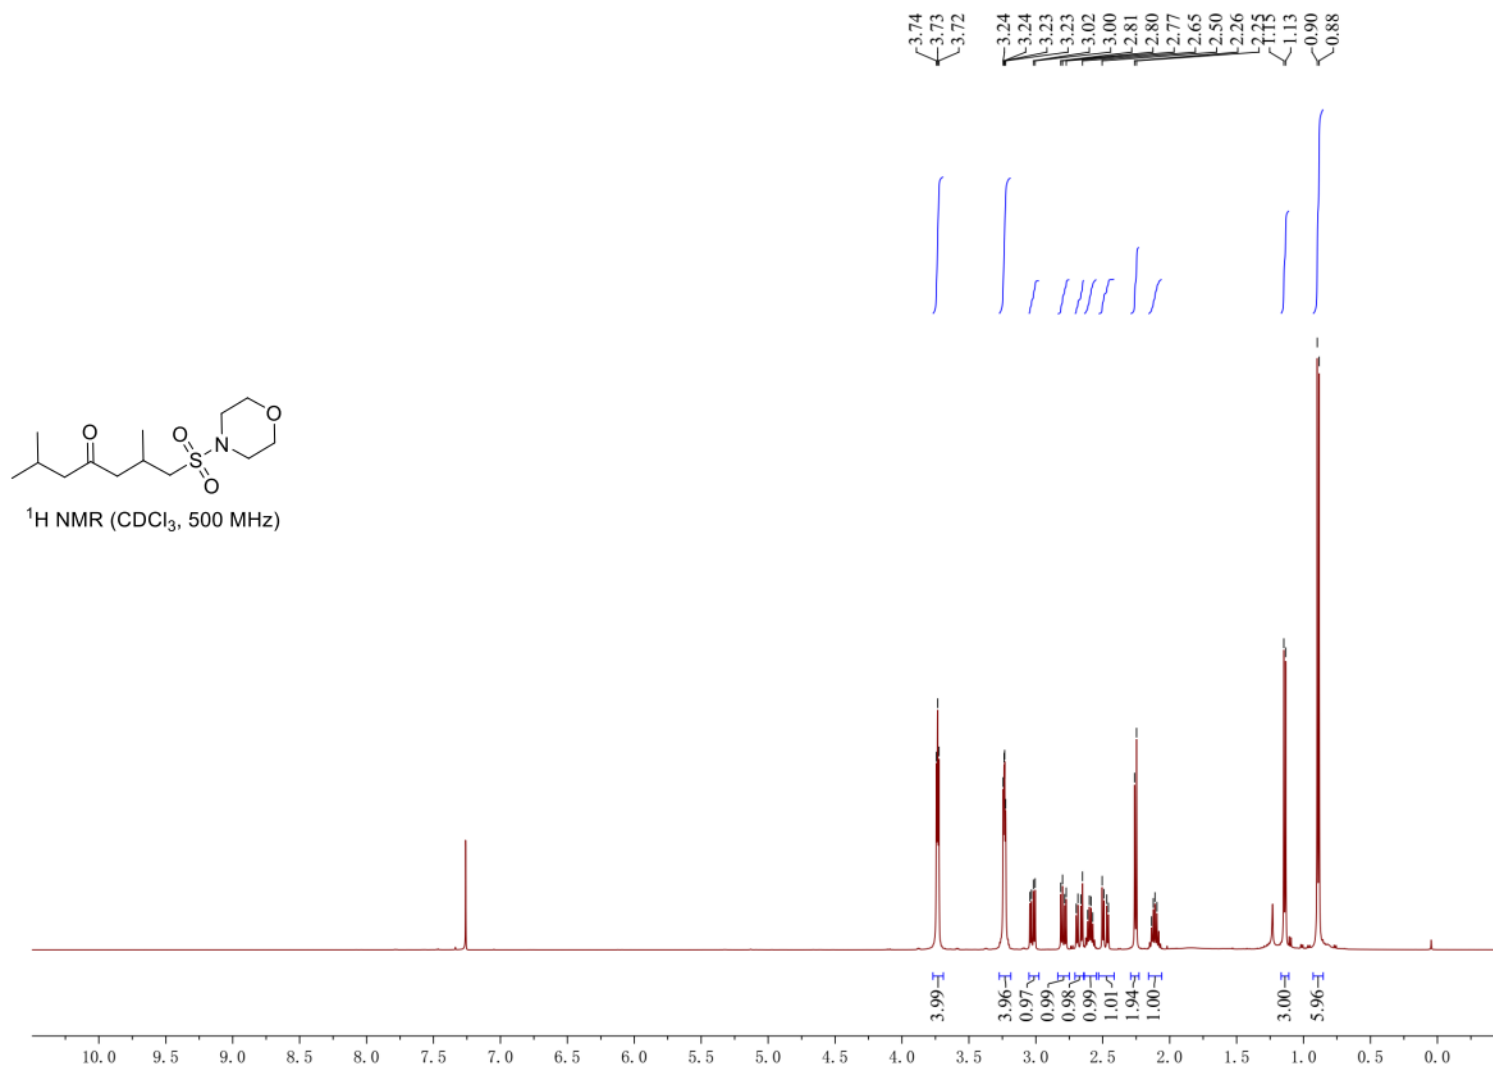

## 2,6-Dimethyl-1-(morpholinosulfonyl)heptan-4-one (42)

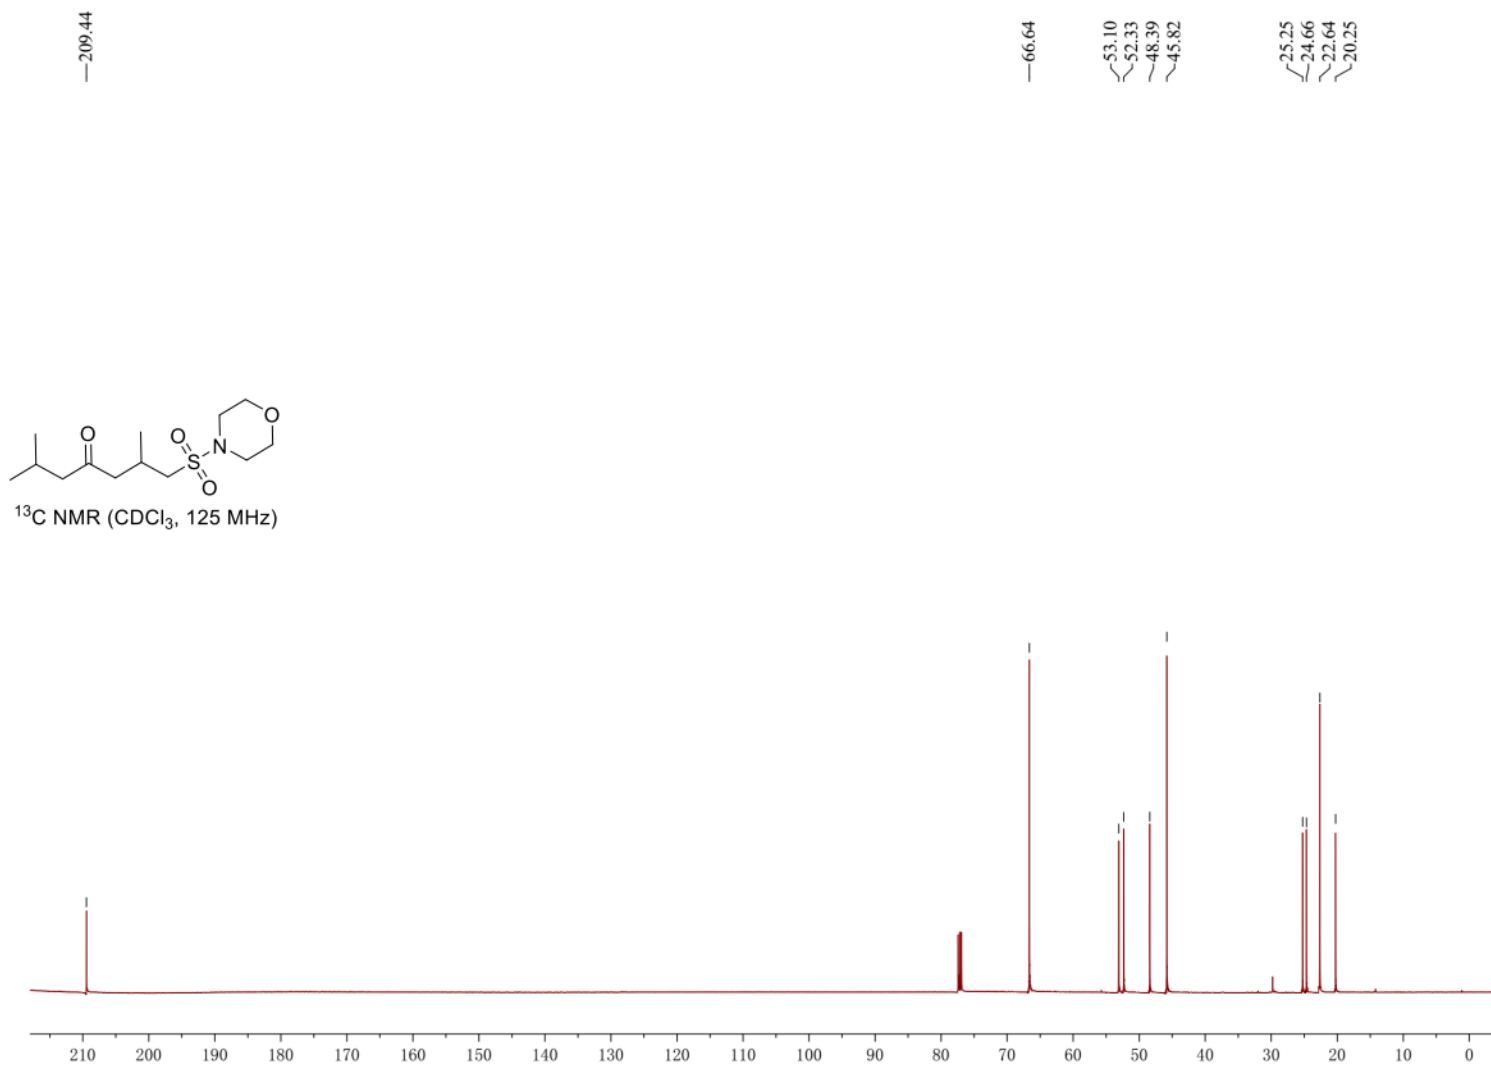

[Go back to table of contents](#)

1-((3,4-Dihydroisoquinolin-2(1H)-yl)sulfonyl)-2,6-dimethylheptan-4-one (43)

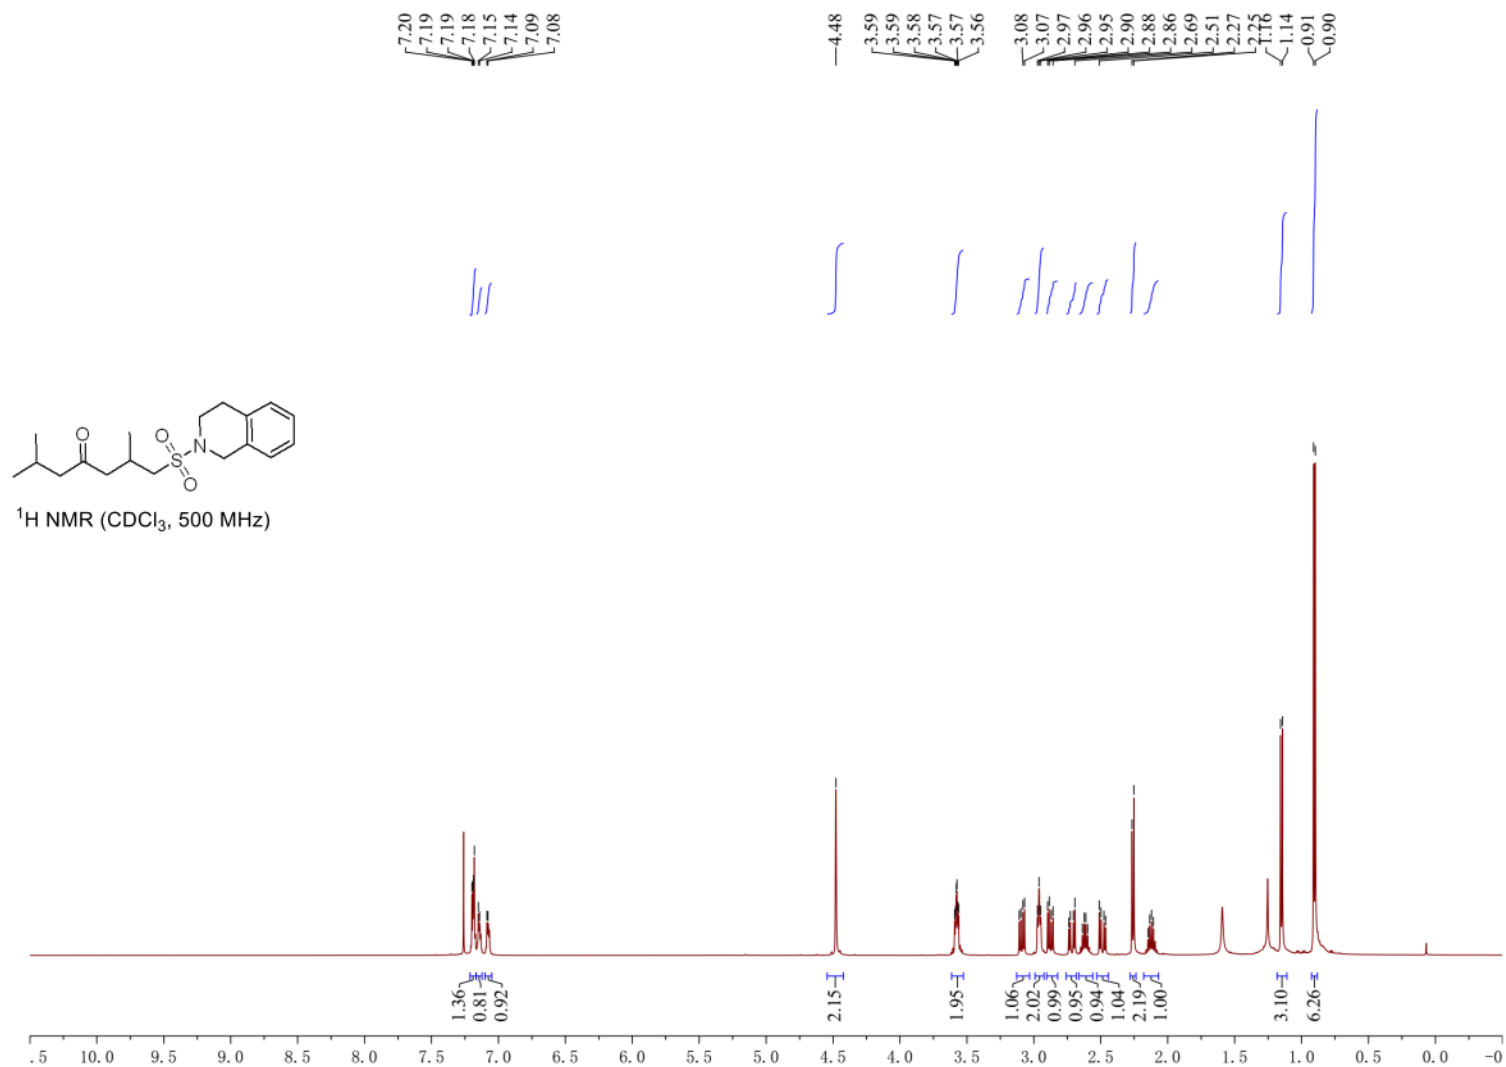

1-((3,4-Dihydroisoquinolin-2(1H)-yl)sulfonyl)-2,6-dimethylheptan-4-one (43)

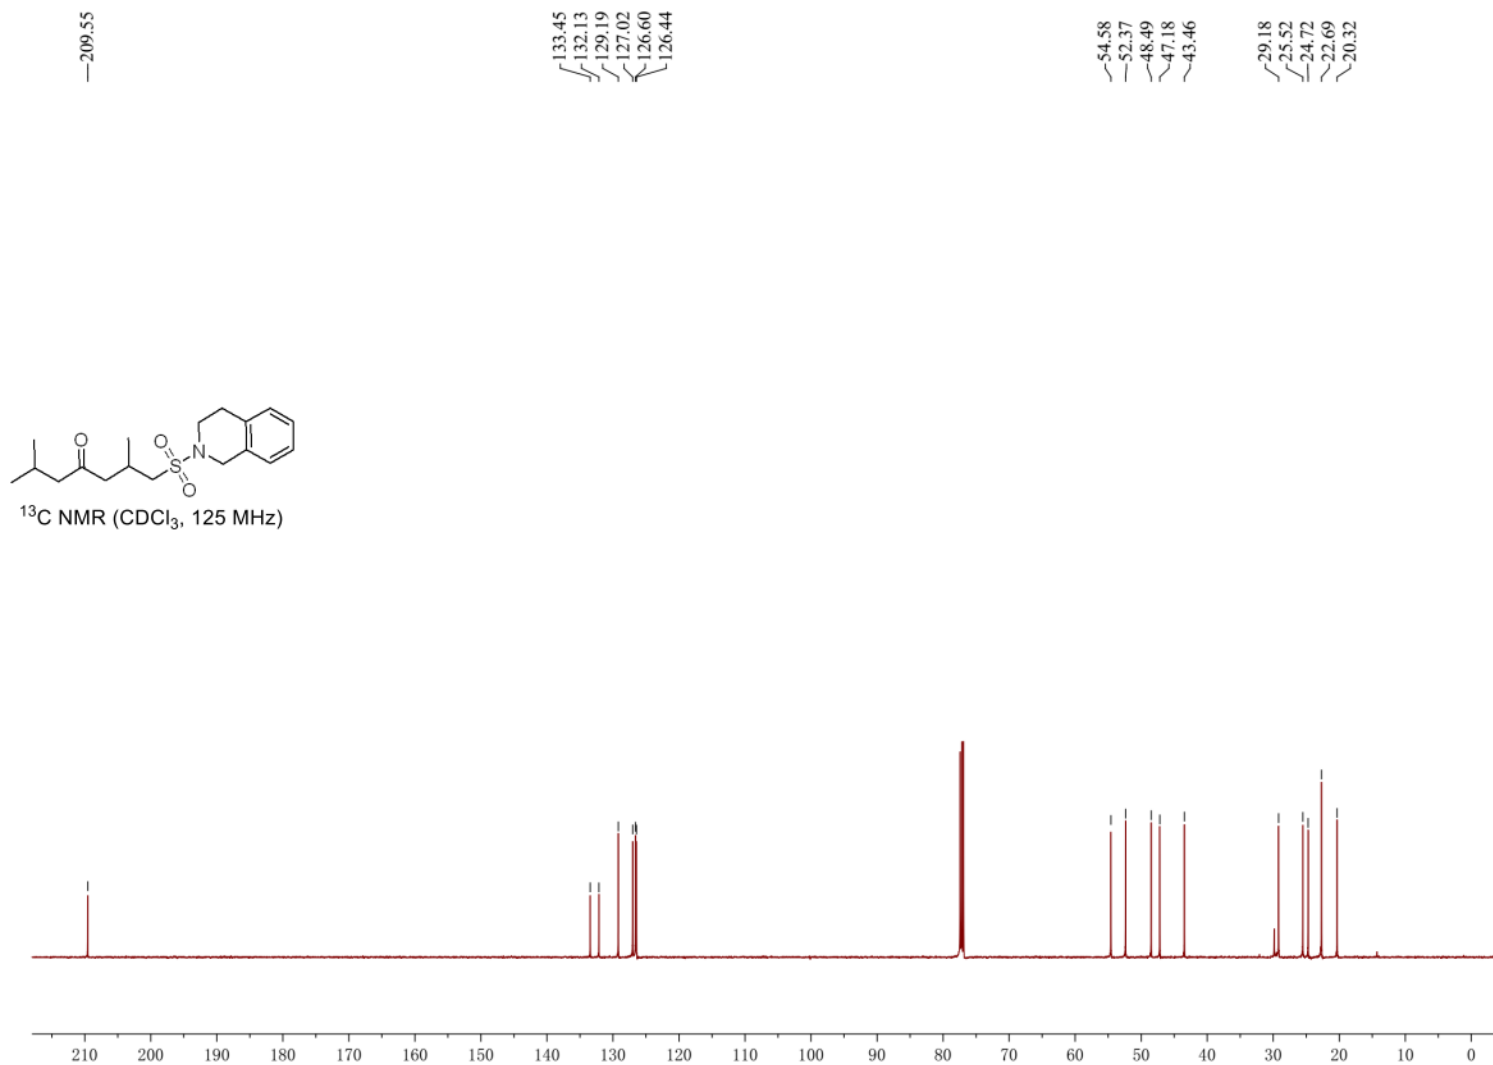

[Go back to table of contents](#)

### 2,6-Dimethyl-4-oxoheptane-1-sulfonyl fluoride (44)

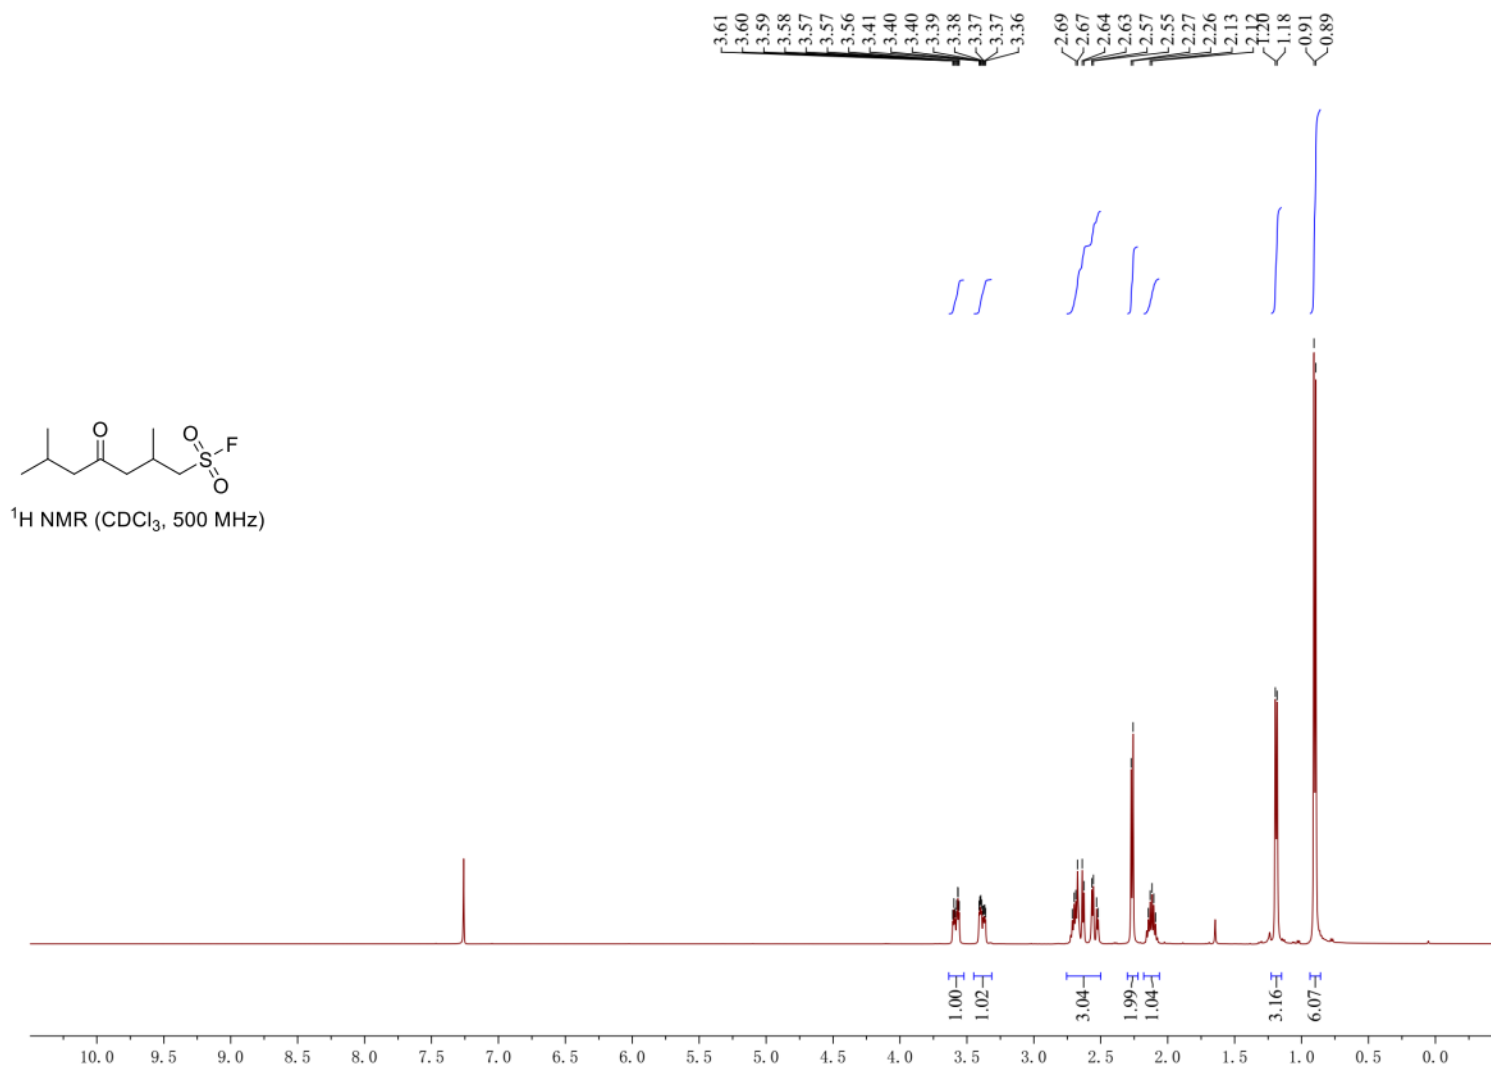

[Go back to table of contents](#)

## 2,6-Dimethyl-4-oxoheptane-1-sulfonyl fluoride (44)

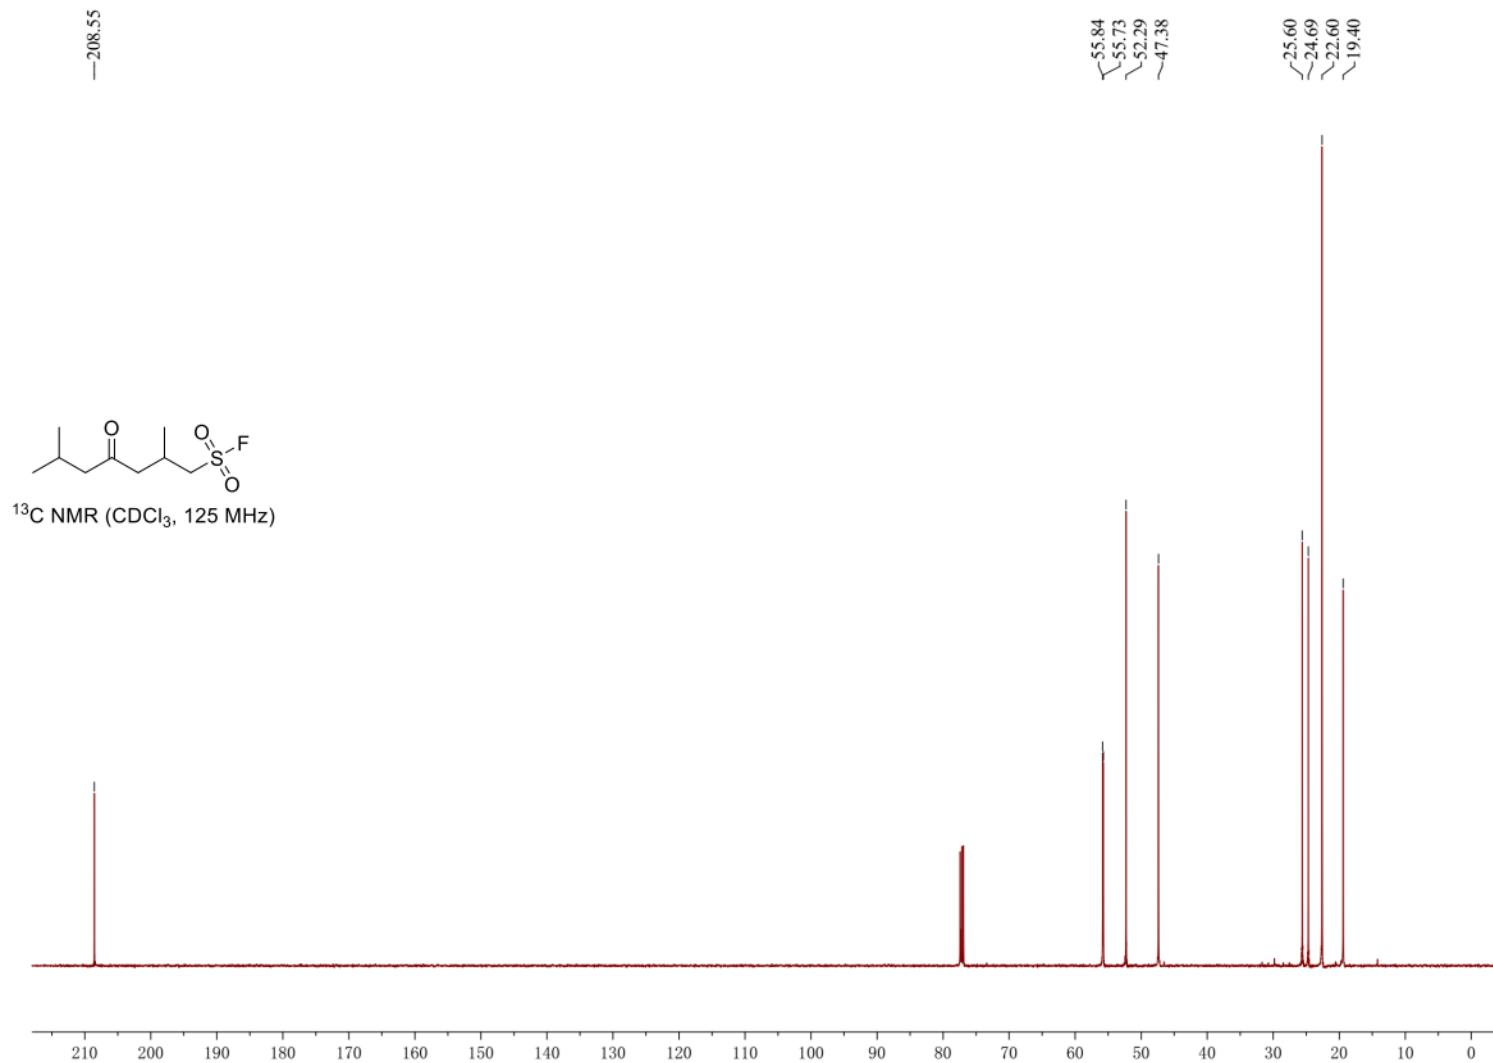

[Go back to table of contents](#)

### 3-Oxopentane-1-sulfonyl fluoride (45)

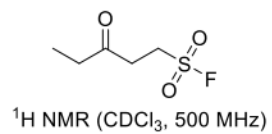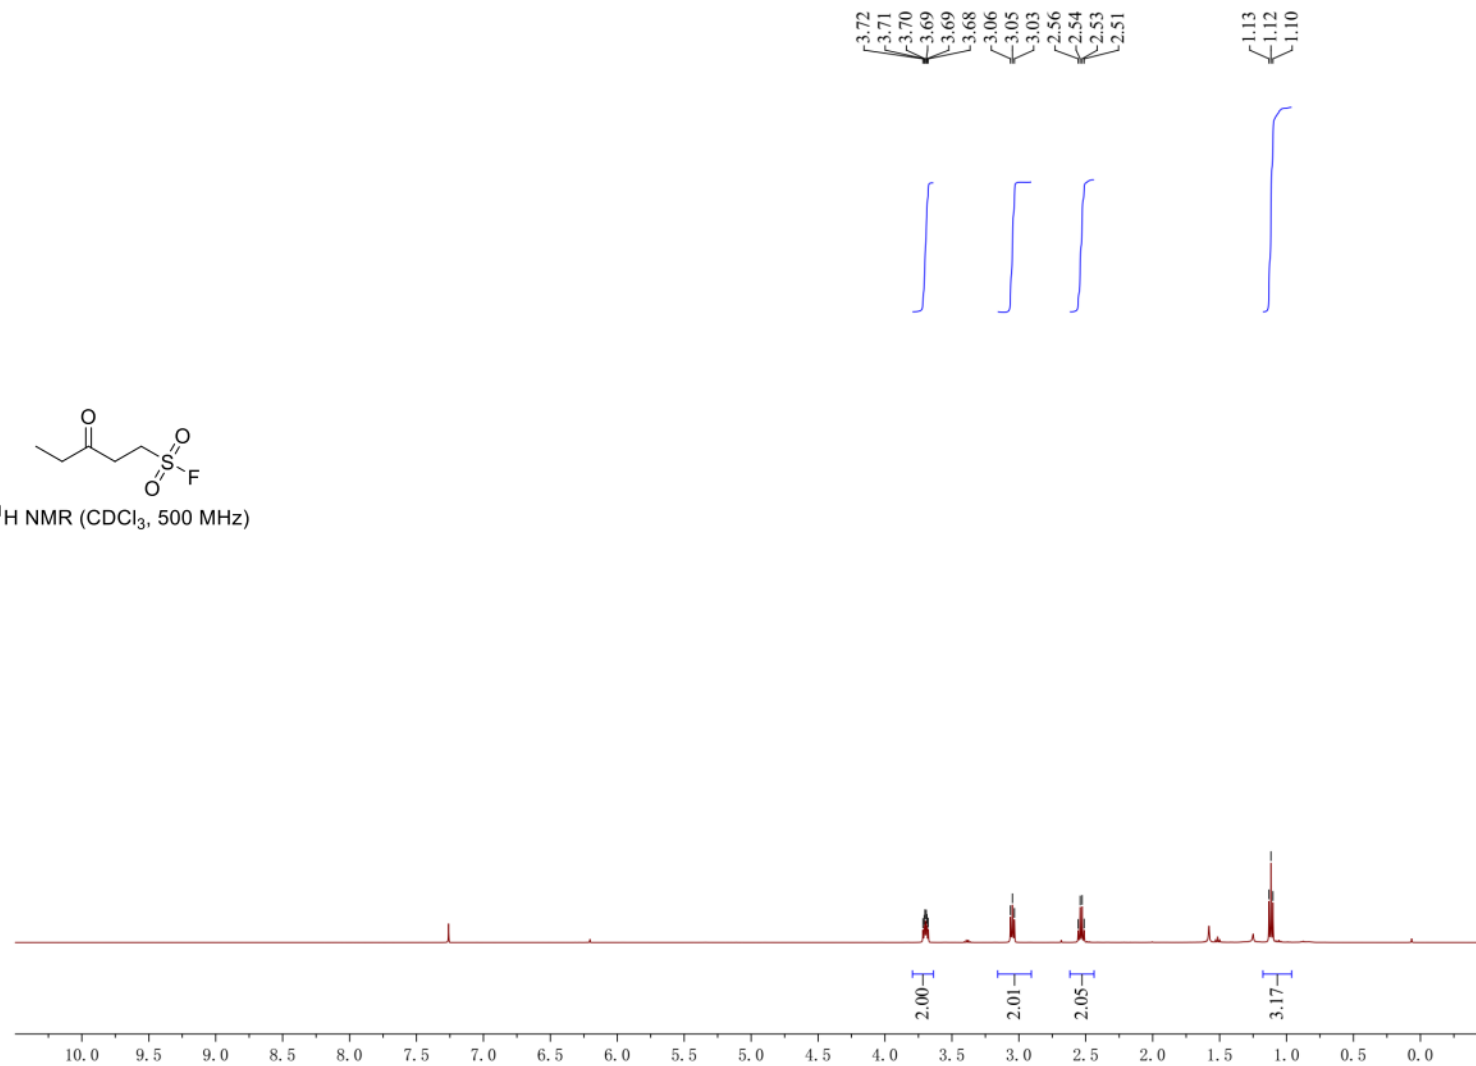

[Go back to table of contents](#)



### 3-Oxopentane-1-sulfonyl fluoride (45)

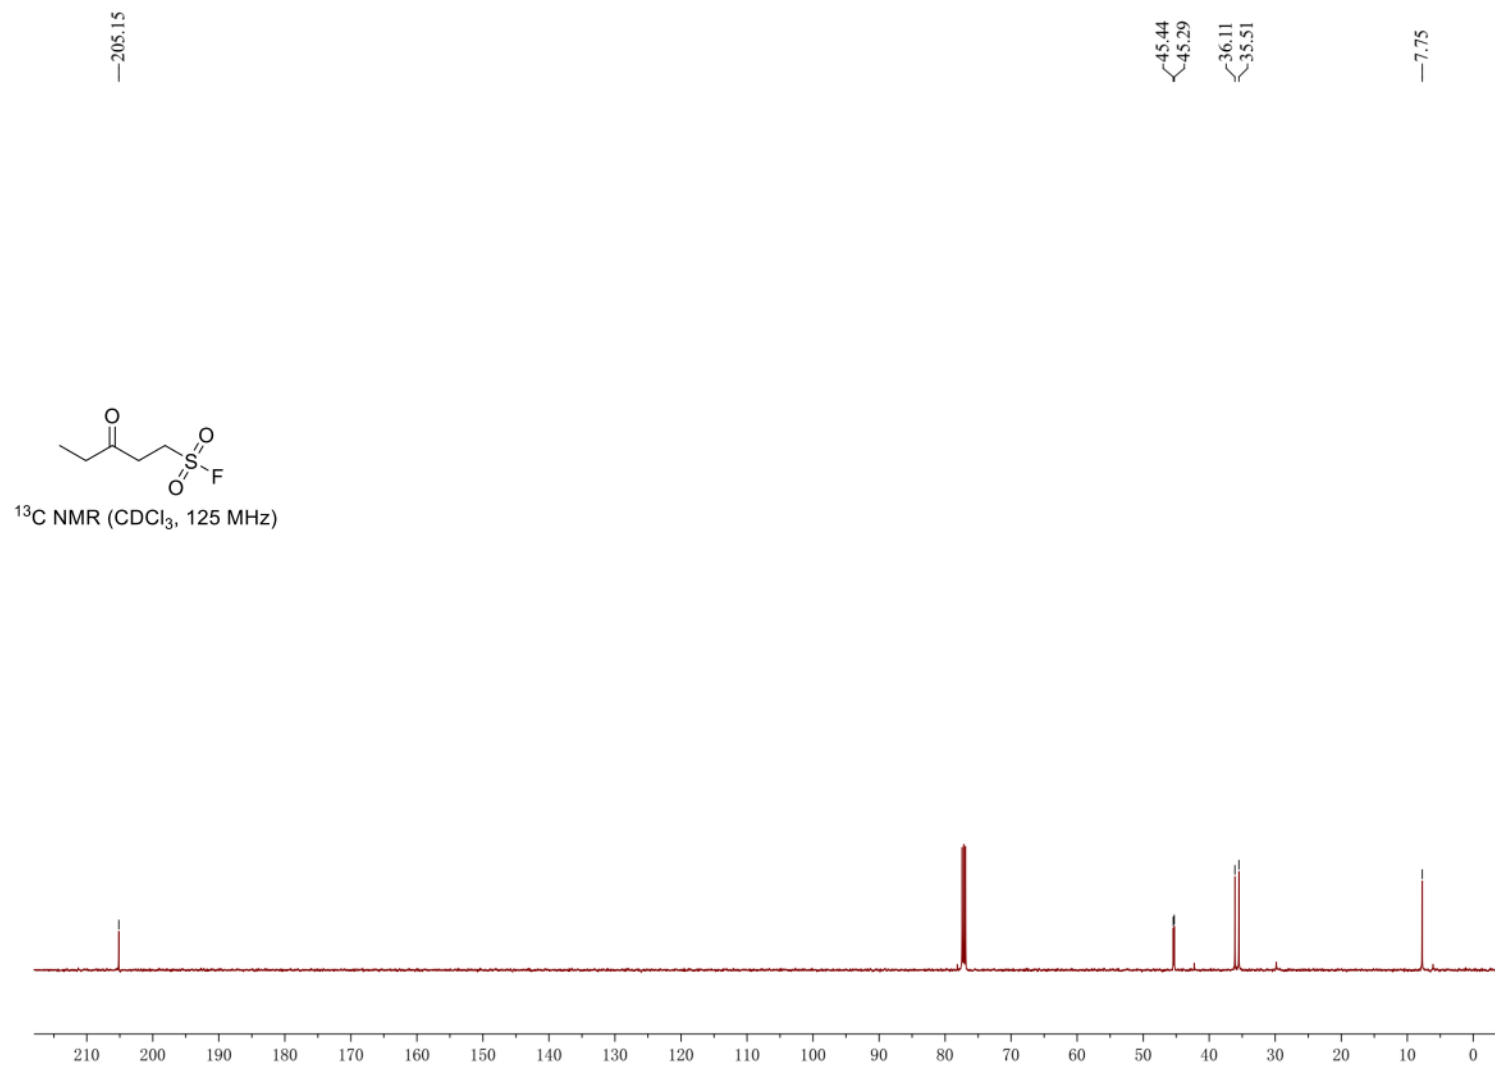

[Go back to table of contents](#)

### 7-Chloro-4-(cyclohexylsulfonyl)quinoline (46)

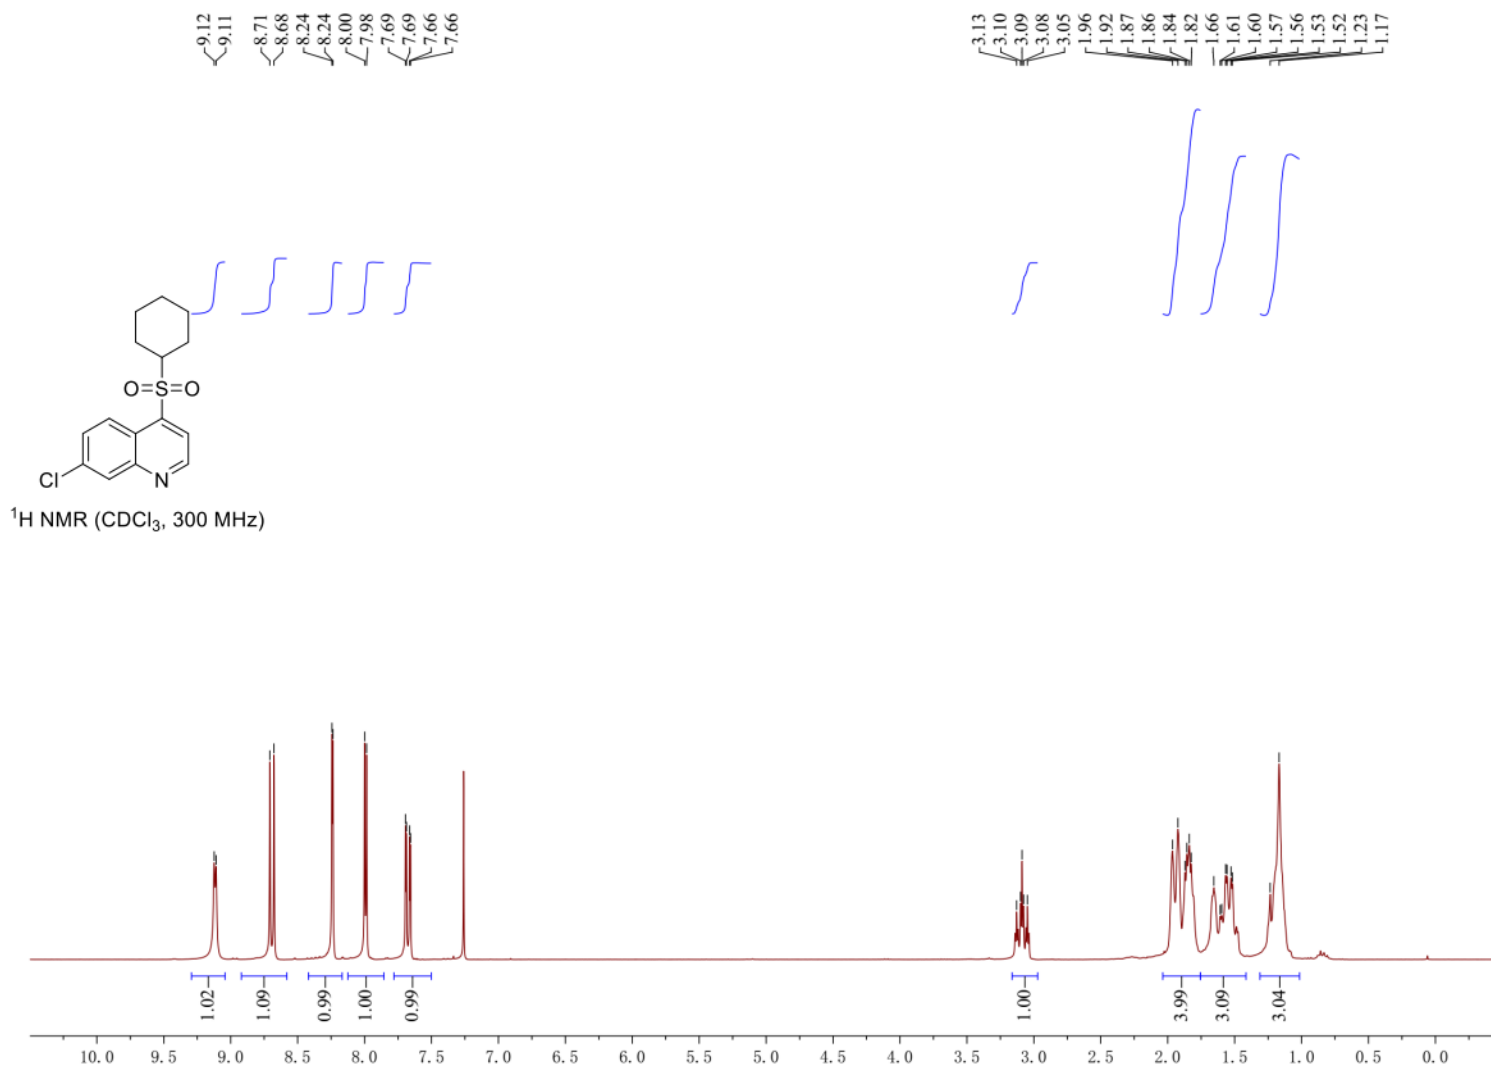

### 7-Chloro-4-(cyclohexylsulfonyl)quinoline (46)

150.74  
149.91  
141.76  
136.70  
129.99  
129.64  
125.88  
123.53  
63.87  
25.09  
24.95

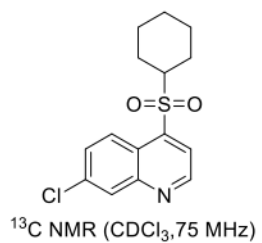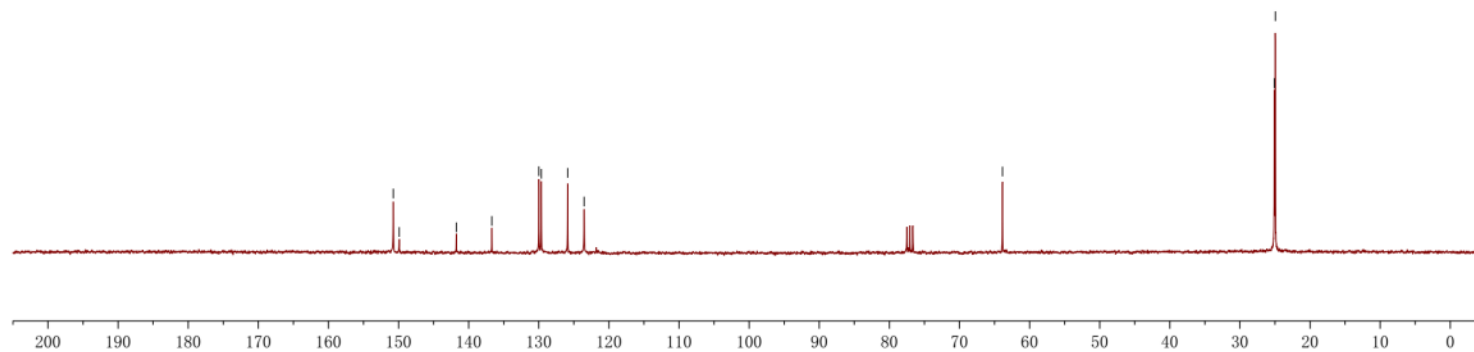

# Sodium cyclopentanesulfinate (47)

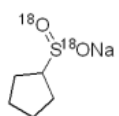

<sup>1</sup>H NMR (500 MHz, CD<sub>3</sub>OD)

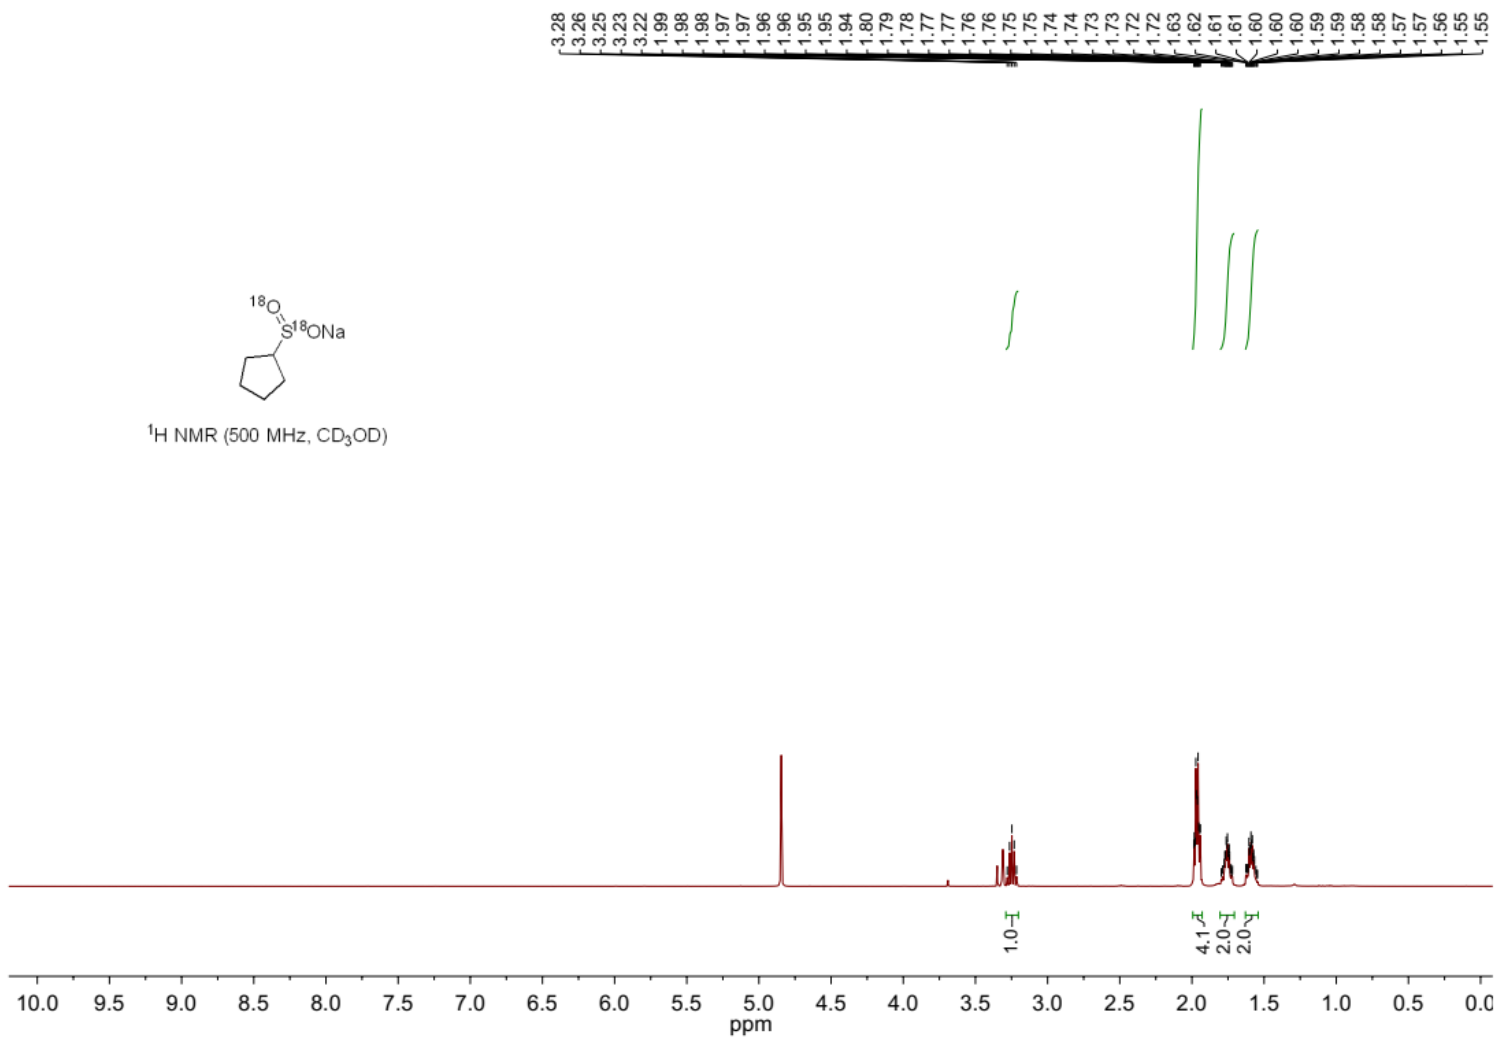

# Sodium cyclopentanesulfinate (47)

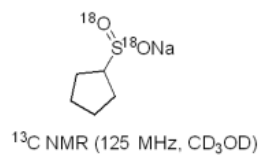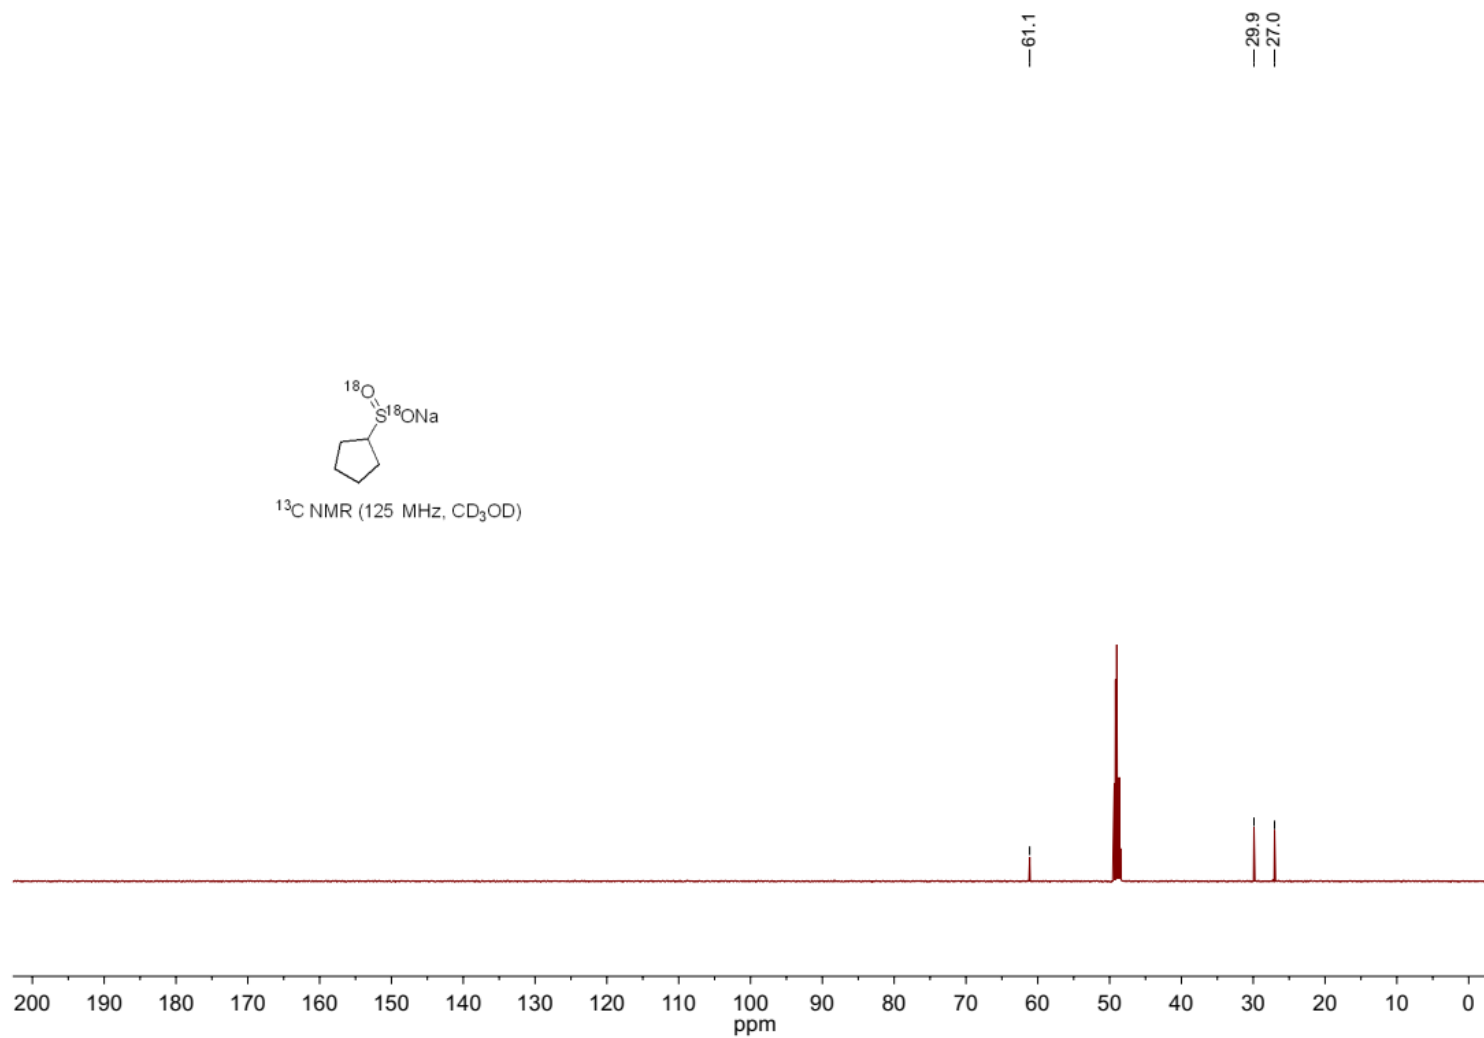

### 7-Chloro-4-(cyclopentylsulfonyl)quinoline (48)

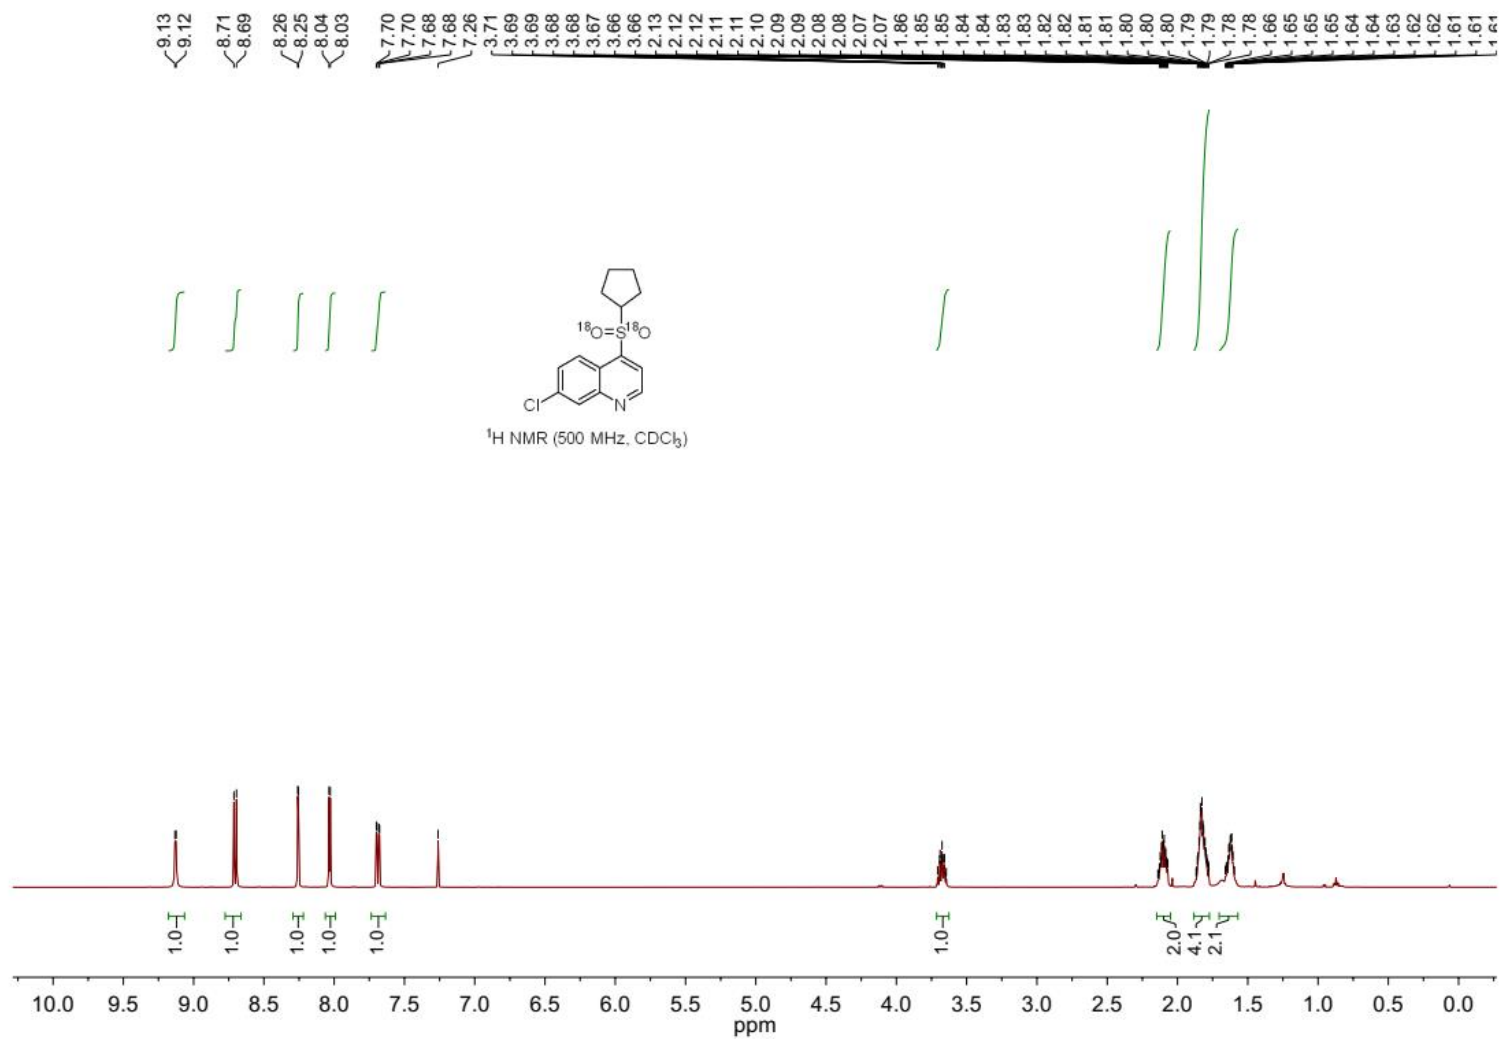

### 7-Chloro-4-(cyclopentylsulfonyl)quinoline (48)

151.0  
150.1  
143.1  
136.8  
130.1  
129.8  
125.8  
122.8  
121.5  
64.4  
27.3  
26.0

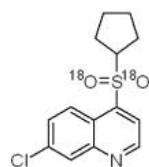

<sup>13</sup>C NMR (125 MHz, CDCl<sub>3</sub>)

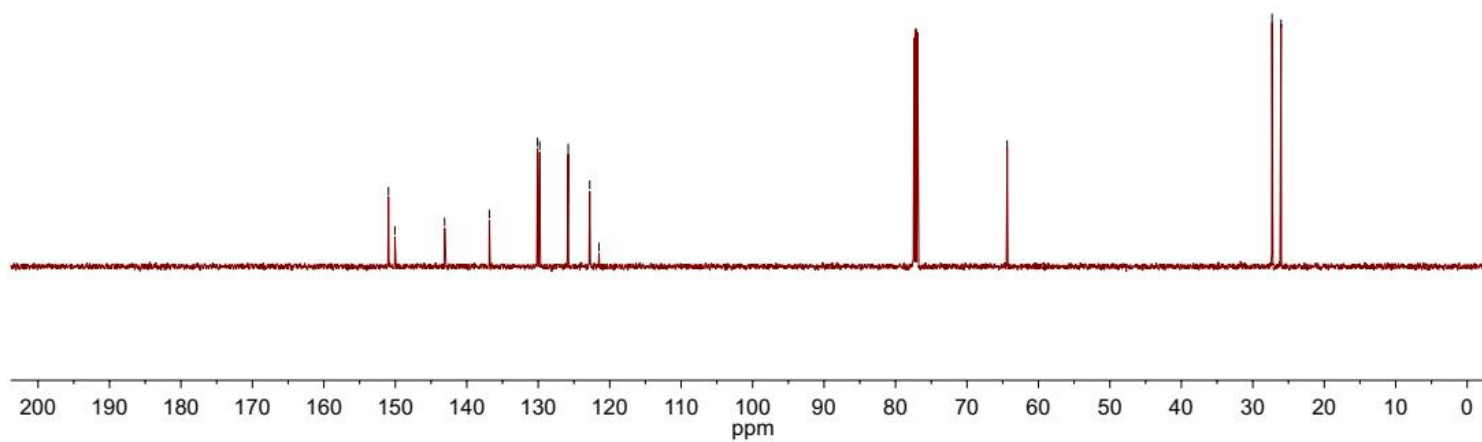

[Go back to table of contents](#)

## References

- 1 L. R. Reddy, B. V. S. Reddy and E. J. Corey, *Org. Lett.*, 2006, **8**, 2819–2821.
- 2 A. Ortiz, L. Quintero, H. Hernandez, S. Maldonado, G. Mendoza and S. Bernes, *Tetrahedron Lett.*, 2003, **44**, 1129–1132.
- 3 G-X. Li, C. A. Morales-Rivera, F. Gao, Y. Wang, G. He, P. Liu and G. Chen, *Chem. Sci.*, 2017, **8**, 7180–7185.
- 4 E. M. Espinoza, J. A. Clark, J. Soliman, J. B. Derr, M. Morales and V. I. Vullev, *J. Electrochem. Soc.*, 2019, **116**, H3175–H3187.
- 5 N. J. Bunce, J. Lamarre and S. P. Vaish, *Photochem. Photobiol.*, 1984, **39**, 531–533.
- 6 J. M. Zaķis, K. Ozols, I. Novosjolova, R. Vilšķērsts, A. Mishnev and M. Turks, *J. Org. Chem.*, 2020, **85**, 4753–4771.
- 7 S. Chen, Y. Li, M. Wang and X. Jiang, *Green Chem.*, 2020, **22**, 322–326.
- 8 B. Zheng, T. Jia and P. J. Walsh, *Org. Lett.*, 2013, **15**, 1690–1693.
- 9 J. F. King and R. Rathore, *Tetrahedron Lett.*, 1989, **30**, 2763–2766.
- 10 Texas Advanced Computing Center (TACC), The University of Texas at Austin
- 11 Gaussian 16, Revision A.03, M. J. Frisch, G. W. Trucks, H. B. Schlegel, G. E. Scuseria, M. A. Robb, J. R. Cheeseman, G. Scalmani, V. Barone, G. A. Petersson, H. Nakatsuji, X. Li, M. Caricato, A. V. Marenich, J. Bloino, B. G. Janesko, R. Gomperts, B. Mennucci, H. P. Hratchian, J. V. Ortiz, A. F. Izmaylov, J. L. Sonnenberg, D. Williams-Young, F. Ding, F. Lipparini, F. Egidi, J. Goings, B. Peng, A. Petrone, T. Henderson, D. Ranasinghe, V. G. Zakrzewski, J. Gao, N. Rega, G. Zheng, W. Liang, M. Hada, M. Ehara, K. Toyota, R. Fukuda, J. Hasegawa, M. Ishida, T. Nakajima, Y. Honda, O. Kitao, H. Nakai, T. Vreven, K. Throssell, J. A. Montgomery, Jr., J. E. Peralta, F. Ogliaro, M. J. Bearpark, J. J. Heyd, E. N. Brothers, K. N. Kudin, V. N. Staroverov, T. A. Keith, R. Kobayashi, J. Normand, K. Raghavachari, A. P. Rendell, J. C. Burant, S. S. Iyengar, J. Tomasi, M. Cossi, J. M. Millam, M. Klene, C. Adamo, R. Cammi, J. W. Ochterski, R. L.



- Martin, K. Morokuma, O. Farkas, J. B. Foresman and D. J. Fox, Gaussian, Inc., Wallingford CT, 2016.
- 12 P. Pracht, F. Bohle and S. Grimme, *Phys. Chem. Chem. Phys.*, 2020, **22**, 7169–7192.
- 13 S. Grimme, C. Bannwarth and P. Shushkov, *J Chem. Theory Comput.*, 2017, **13**, 1989–2009.
- 14 C. Bannwarth, S. Ehlert and S. Grimme, *J. Chem. Theory Comput.*, 2019, **15**, 1652–1671.
- 15 CYLview, 1.0b, C. Y. Legault, Université de Sherbrooke, 2009 (<http://www.cylview.org>).
- 16 F. Neese, *WIREs: Comput. Mol. Sci.*, 2012, **2**, 73–78.
- 17 F. Neese, *WIREs: Comput. Mol. Sci.*, 2017, **8**, e1327.
- 18 (a) C. Riplinger and F. Neese, *J. Chem. Phys.*, 2013, **138**, 034106; (b) M. Sparta, B. Sandhoefer, A. Hansen and F. Neese, *J. Chem. Phys.*, 2013, **139**, 134101.
- 19 J. A. People, M. Head-Gordon and K. Raghavachari, *J. Chem. Phys.*, 1987, **87**, 5968–5975.
- 20 G. D. Purvis and R. J. Bartlett, *J. Chem. Phys.*, 1982, **76**, 1910–1918.
- 21 R. A. Kendall, T. H. Dunning Jr. and R. J. Harrison, *J. Chem. Phys.* 1992, **96**, 6796–6806.
- 22 Y. Shao, E. Gan, A. Epifanovsky, A. T. B. Gilbert, M. Wormit, J. Kussmann, A. W. Lange, A. Behn, J. Deng, X. Feng, D. Ghosh, M. Goldey, P. R. Horn, L. D. Jacobson, I. Kaliman, R. Z. Khaliullin, T. Kúš, A. Landau, J. Liu, E. I. Proynov, Y. M. Rhee, R. M. Richard, M. A. Rohrdanz, R. P. Steele, E. J. Sundstrom, H. L. Woodcock III, P. M. Zimmerman, D. Zuev, B. Albrecht, E. Alguire, B. Austin, G. J. O. Beran, Y. A. Bernard, E. Berquist, K. Brandhorst, K. B. Bravaya, S. T. Brown, D. Casanova, C.-M. Chang, Y. Chen, S. H. Chien, K. D. Closser, D. L. Crittenden, M. Diedenhofen, R. A. DiStasio Jr., H. Dop, A. D. Dutoi, R. G. Edgar, S. Fatehi, L. Frusti-Molnar, A. Ghysels, A. Golubeva-Zadorozhnaya, J. Gomes, M. W. D. Hanson-Heine, P. H. P. Harbach, A. W. Hauser, E. G. Hohenstein, Z. C. Holden, T.-C. Jagau, H. Ji, B. Kaduk, K. Khistyayev, J. Kim, J. Kim,

- R. A. King, P. Klunzinger, D. Kosenkov, T. Kowalczyk, C. M. Krauter, K. U. Lao, A. Laurent, K. V. Lawler, S. V. Levchenko, C. Y. Lin, F. Liu, E. Livshits, R. C. Lochan, A. Luenser, P. Manohar, S. F. Manzer, S.-P. Mao, N. Mardirossian, A. V. Marenich, S. A. Maurer, N. J. Mayhall, C. M. Oana, R. Olivares-Amaya, D. P. O'Neill, J. A. Parkhill, T. M. Perrine, R. Peverati, P. A. Pieniazek, A. Prociuk, D. R. Rehn, E. Rosta, N. J. Russ, N. Sergueev, S. M. Sharada, S. Sharma, D. W. Small, A. Sodt, T. Stein, D. Stück, Y.-C. Su, A. J. W. Thom, T. Tsuchimochi, L. Vogt, O. Vydrov, T. Wang, M. A. Watson, J. Wenzel, A. White, C. F. Williams, V. Vanovschi, S. Yeganeh, S. R. Yost, Z.-Q. You, Y. Zhang, X. Zhang, Y. Zhou, B. R. Brooks, G. K. L. Chan, D. M. Chipman, C. J. Cramer, W. A. Goddard III, M. S. Gordon, W. J. Hehre, A. Klamt, H. F. Schaefer III, M. W. Schmidt, C. D. Sherrill, D. G. Truhlar, A. Warshel, X. Xua, A. Aspuru-Guzik, R. Baer, A. T. Bell, N. A. Besley, J.-D. Chai, A. Dreuw, B. D. Dunietz, T. R. Furlani, S. R. Gwaltney, C.-P. Hsu, Y. Jung, J. Kong, D. S. Lambrecht, W. Liang, C. Ochsenfeld, V. A. Rassolov, L. V. Slipchenko, J. E. Subotnik, T. Van Voorhis, J. M. Herbert, A. I. Krylov, P. M. W. Gill and M. Head-Gordon, *Mol. Phys.*, 2015, **113**, 184–215.
- 23 NBO 7.0. E. D. Glendening, J. K. Badenhoop, A. E. Reed, J. E. Carpenter, J. A. Bohmann, C. M. Morales, P. Karafiloglou, C. R. Landis and F. Weinhold, Theoretical Chemistry Institute, University of Wisconsin, Madison, **2018**.
- 24 Chemcraft - graphical software for visualization of quantum chemistry computations.  
<https://www.chemcraftprog.com>
- 25 T. Lu and F. Chen, *J. Comp. Chem.*, 2012, **33**, 580–592.
- 26 Humphrey, W., Dalke, A. and Schulten, K. "VMD - Visual Molecular Dynamics", *J. Molec. Graphics*, 1996, **14**, 33–38.
- 27 S. Grimme, J. Antony, S. Ehrlich and H. Krieg, *J. Chem. Phys.*, 2010, **132**, 154104.
- 28 Y. Zhao and D. G. Truhlar, *J. Phys. Chem. A*, 2005, **109**, 5656–5667.
- 29 F. Weigend and R. Ahlrichs, *Phys. Chem. Chem. Phys.*, 2005, **7**, 3297–3305.

- 30 J. L. Pascual-Ahuir, E. Silla and I. Tuñón, *J. Comp. Chem.*, 1994, **15**, 1127–1138.
- 31 S. Miertuš and J. Tomasi, *Chem. Phys.*, 1982, **65**, 239–245.
- 32 S. Miertuš, E. Scrocco and J. Tomasi, *Chem. Phys.*, 1981, **55**, 117–129.
- 33 B. Allard, A. Casadevall, G. Casadevall and C. Largeau, *Nouv. J. Chim.*, 1979, **3**, 335–342.
- 34 Derived as a square of the refractive index  $n = 1.275$  at 25 °C: E. E. Drott, *Liquid Chromatography of Polymers and Related Materials*, ed. J. Cazes, Marcel Dekker, New York, 1977, vol. 8.
- 35 A. Hansen, C. Bannwarth, S. Grimme, P. Petrović, C. Werlé and J.-P. Djukic, *ChemistryOpen*, 2014, **3**, 177–189.
- 36 (a) G. Luchini, J. V. Alegre-Requena, Y. Guan, I. Funes-Ardoiz and R. S. Paton, GoodVibes: GoodVibes v3.0.1 (2019); (b) G. Luchini, J. V. Alegre-Requena, Y. Guan, I. Funes-Ardoiz and R. S. Paton, *F1000Research* 2020, **9**, 291.
- 37 J.-D. Chai and M. Head-Gordon, *Phys. Chem. Chem. Phys.*, 2008, **10**, 6615–6620.
- 38 F. Weigend and R. Ahlrichs, *Phys. Chem. Chem. Phys.*, 2005, **7**, 3297–3305.
- 39 L. Goerigk and S. Grimme, *J. Chem. Theory Comput.*, 2011, **7**, 291–309.
- 40 L. Goerigk, ccA. Hansen, C. Bauer, S. Ehrlich, A. Najibi and S. Grimme, *Phys. Chem. Chem. Phys.*, 2017, **19**, 32184.
- 41 (a) K. Morokuma, *J. Chem. Phys.*, 1971, **55**, 1236–1244; (b) L. P. Wolters and F. M. Bickelhaupt, *WIREs Comput. Mol. Sci.*, 2015, **5**, 324–343; (c) F. M. Bickelhaupt and K. N. Houk, *Angew. Chem., Int. Ed.*, 2017, **56**, 10070–10086; (d) D. H. Ess and K. N. Houk, *J. Am. Chem. Soc.*, 2007, **129**, 10646–10647.
- 42 (a) R. Z. Khaliullin, E. A. Cobar, R. C. Lochan, A. T. Bell and M. Head-Gordon, *J. Phys. Chem. A*, 2007, **111**, 8753–8765; (b) P. R. Horn, E. J. Sundstrom, T. A. Baker and M. Head-Gordon, *J. Chem. Phys.*, 2013, **138**, 134119; (c) P. R. Horn, Y. Mao and M. Head-Gordon, *Phys. Chem. Chem. Phys.*, 2016, **18**, 23067.

- 43 R. Z. Khaliullin, A. T. Bell and M. Head-Gordon, *J. Chem. Phys.* 2008, **128**, 184112.
- 44 A. A. Isse and A. Gennaro, *J. Phys. Chem. B*, 2010, **114**, 7894–7899.
- 45 (a) M. Sparta and F. Neese, *Chem. Soc. Rev.*, 2014, **43**, 5032–5041; (b) I. Sandler, J. Chen, M. Taylor, S. Sharma and J. Ho, *J. Phys. Chem.*, 2021, **125**, 1553–1563.
- 46 D. G. Liakos, M. Sparta, M. K. Kesharwani, J. M. L. Martin and F. Neese, *J. Chem. Theory. Comput.*, 2015, **11**, 1525–1539.
